# Supplementary material
Source: publisher figshare collection journal article supplement (https://acs.figshare.com/ndownloader/files/3879355)
Supplement: Supplementary file 1 [file 3879355]

data_publication_text
_publ_requested_journal          'Inorganic Chemistry'
_publ_contact_author_name        'Tadeusz M. Muziol'
_publ_contact_author_address     
;Nicolaus Copernicus University
Faculty of Chemistry
Gagarina 7, 
87-100 Torun, Poland
;
_publ_contact_author_email       tmuziol@chem.uni.torun.pl
_publ_contact_author_phone       '+48 56 6114976'
loop_
_publ_author_name
_publ_author_address
'Muziol, Tadeusz M.'
;Nicolaus Copernicus University
Faculty of Chemistry
Gagarina 7, 
87-100 Torun, Poland
;
'Piszczek, Piotr'
;Nicolaus Copernicus University
Faculty of Chemistry
Gagarina 7, 
87-100 Torun, Poland
;
'Radtke, Aleksandra'
;Nicolaus Copernicus University
Faculty of Chemistry
Gagarina 7, 
87-100 Torun, Poland
;
'Wojtczak, Andrzej'
;Nicolaus Copernicus University
Faculty of Chemistry
Gagarina 7, 
87-100 Torun, Poland
;
 
data_structure6

_audit_creation_method           SHELXL-2013
_chemical_name_systematic        ?
_chemical_name_common            ?
_chemical_formula_moiety         'Ti4 O4 4(C5 H9 O2) 4(C4 H9 O1); 0.5(C7 H8)'
_chemical_formula_sum            'C39.50 H76 O16 Ti4'
_chemical_melting_point          ?

_exptl_crystal_description       ?
_exptl_crystal_colour            colourless

_diffrn_ambient_temperature      292(2)
_chemical_formula_weight         998.60

loop_
_atom_type_symbol
_atom_type_description
_atom_type_scat_dispersion_real
_atom_type_scat_dispersion_imag
_atom_type_scat_source
C C 0.0033 0.0016 'International Tables Vol C Tables 4.2.6.8 and 6.1.1.4'
H H 0.0000 0.0000 'International Tables Vol C Tables 4.2.6.8 and 6.1.1.4'
O O 0.0106 0.0060 'International Tables Vol C Tables 4.2.6.8 and 6.1.1.4'
Ti Ti 0.2776 0.4457 'International Tables Vol C Tables 4.2.6.8 and 6.1.1.4'

_space_group_crystal_system      monoclinic
_space_group_IT_number           11
_space_group_name_H-M_alt        'P 21/m'
_space_group_name_Hall           '-P 2yb'

_shelx_space_group_comment       
;
The symmetry employed for this shelxl refinement is uniquely defined
by the following loop, which should always be used as a source of
symmetry information in preference to the above space-group names.
They are only intended as comments.
;

loop_
_space_group_symop_operation_xyz
'x, y, z'
'-x, y+1/2, -z'
'-x, -y, -z'
'x, -y-1/2, z'

_cell_length_a                   12.962(3)
_cell_length_b                   16.979(3)
_cell_length_c                   13.317(3)
_cell_angle_alpha                90
_cell_angle_beta                 104.16(3)
_cell_angle_gamma                90
_cell_volume                     2841.8(11)
_cell_formula_units_Z            2
_cell_measurement_temperature    292(2)
_cell_measurement_reflns_used    ?
_cell_measurement_theta_min      ?
_cell_measurement_theta_max      ?
_exptl_crystal_density_meas      ?
_exptl_crystal_density_method    ?
_exptl_crystal_density_diffrn    1.167
_exptl_crystal_F_000             1058
_exptl_transmission_factor_min   ?
_exptl_transmission_factor_max   ?
_exptl_crystal_size_max          0.800
_exptl_crystal_size_mid          0.400
_exptl_crystal_size_min          0.200
_exptl_absorpt_coefficient_mu    0.596
_shelx_estimated_absorpt_T_min   0.647
_shelx_estimated_absorpt_T_max   0.890
_exptl_absorpt_correction_type   numerical
_exptl_absorpt_correction_T_min  0.6473
_exptl_absorpt_correction_T_max  0.8902
_exptl_absorpt_process_details   'CrysAlis CCD, Oxford 2001'

_exptl_special_details           
;
 ?
;
_diffrn_radiation_probe          x-ray
_diffrn_radiation_type           MoK\a
_diffrn_radiation_wavelength     0.71073
_diffrn_source                   'fine-focus sealed X-ray tube'
_diffrn_measurement_device_type  'Oxford Sapphire CCD diffractometer'
_diffrn_measurement_method       'phi and omega scans'
_diffrn_detector_area_resol_mean ?
_diffrn_reflns_number            21589
_diffrn_reflns_av_unetI/netI     0.0408
_diffrn_reflns_av_R_equivalents  0.0606
_diffrn_reflns_limit_h_min       -16
_diffrn_reflns_limit_h_max       16
_diffrn_reflns_limit_k_min       -21
_diffrn_reflns_limit_k_max       20
_diffrn_reflns_limit_l_min       -16
_diffrn_reflns_limit_l_max       14
_diffrn_reflns_theta_min         2.303
_diffrn_reflns_theta_max         26.372
_diffrn_reflns_theta_full        25.242
_diffrn_measured_fraction_theta_max 0.999
_diffrn_measured_fraction_theta_full 0.998
_diffrn_reflns_Laue_measured_fraction_max 0.999
_diffrn_reflns_Laue_measured_fraction_full 0.998
_diffrn_reflns_point_group_measured_fraction_max 0.999
_diffrn_reflns_point_group_measured_fraction_full 0.998
_reflns_number_total             6013
_reflns_number_gt                4840
_reflns_threshold_expression     'I > 2\s(I)'
_reflns_Friedel_coverage         0.000
_reflns_Friedel_fraction_max     .
_reflns_Friedel_fraction_full    .

_reflns_special_details          
;
 Reflections were merged by SHELXL according to the crystal
 class for the calculation of statistics and refinement.
 
 _reflns_Friedel_fraction is defined as the number of unique
 Friedel pairs measured divided by the number that would be
 possible theoretically, ignoring centric projections and
 systematic absences.
;

_computing_data_collection       CrysAlisCCD
_computing_cell_refinement       ?
_computing_data_reduction        'CrysAlis 171'
_computing_structure_solution    'SHELXS-97 (Sheldrick, 1990)'
_computing_structure_refinement  'SHELXL-2013 (Sheldrick, 2013)'
_computing_molecular_graphics    ?
_computing_publication_material  CIFTAB

_refine_special_details          
;
 ?
;
_refine_ls_structure_factor_coef Fsqd
_refine_ls_matrix_type           full
_refine_ls_weighting_scheme      calc
_refine_ls_weighting_details     
'w=1/[\s^2^(Fo^2^)+(0.1655P)^2^+1.0041P] where P=(Fo^2^+2Fc^2^)/3'
_atom_sites_solution_primary     ?
_atom_sites_solution_secondary   ?
_atom_sites_solution_hydrogens   mixed
_refine_ls_hydrogen_treatment    constr
_refine_ls_extinction_method     none
_refine_ls_extinction_coef       .
_refine_ls_number_reflns         6013
_refine_ls_number_parameters     352
_refine_ls_number_restraints     136
_refine_ls_R_factor_all          0.0876
_refine_ls_R_factor_gt           0.0761
_refine_ls_wR_factor_ref         0.2399
_refine_ls_wR_factor_gt          0.2220
_refine_ls_goodness_of_fit_ref   1.077
_refine_ls_restrained_S_all      1.606
_refine_ls_shift/su_max          0.001
_refine_ls_shift/su_mean         0.000

loop_
_atom_site_label
_atom_site_type_symbol
_atom_site_fract_x
_atom_site_fract_y
_atom_site_fract_z
_atom_site_U_iso_or_equiv
_atom_site_adp_type
_atom_site_occupancy
_atom_site_site_symmetry_order
_atom_site_calc_flag
_atom_site_refinement_flags_posn
_atom_site_refinement_flags_adp
_atom_site_refinement_flags_occupancy
_atom_site_disorder_assembly
_atom_site_disorder_group
Ti1 Ti 0.95585(6) 0.7500 0.43915(6) 0.0340(2) Uani 1 2 d S T P . .
Ti2 Ti 0.72513(6) 0.7500 0.37877(6) 0.0359(2) Uani 1 2 d S T P . .
Ti3 Ti 0.84411(4) 0.66460(4) 0.24337(4) 0.0391(2) Uani 1 1 d . . . . .
O1 O 0.9428(2) 0.7500 0.2784(2) 0.0339(6) Uani 1 2 d S T P . .
O2 O 0.84082(17) 0.67662(12) 0.39986(16) 0.0333(5) Uani 1 1 d . . . . .
O3 O 0.7438(2) 0.7500 0.2286(2) 0.0379(7) Uani 1 2 d S T P . .
O4 O 1.06097(19) 0.66252(14) 0.43227(19) 0.0462(6) Uani 1 1 d . . . . .
O5 O 0.96734(19) 0.58959(14) 0.3021(2) 0.0493(6) Uani 1 1 d . . . . .
O6 O 0.7255(2) 0.58662(16) 0.2445(2) 0.0530(6) Uani 1 1 d . . . . .
O7 O 0.62313(19) 0.65800(15) 0.3229(2) 0.0480(6) Uani 1 1 d . . . . .
O10 O 0.9898(3) 0.7500 0.5749(3) 0.0522(9) Uani 1 2 d S T P B .
O9 O 0.6863(3) 0.7500 0.4965(3) 0.0518(9) Uani 1 2 d S T P . .
O8 O 0.8424(2) 0.64198(19) 0.1143(2) 0.0588(7) Uani 1 1 d . . . . .
C1 C 1.0513(3) 0.6052(2) 0.3714(3) 0.0446(8) Uani 1 1 d . . . . .
C6 C 0.6418(3) 0.5965(2) 0.2763(3) 0.0500(8) Uani 1 1 d . . . . .
C2 C 1.1454(3) 0.5481(3) 0.3834(3) 0.0580(10) Uani 1 1 d . . . . .
C15 C 0.6256(5) 0.7500 0.5715(5) 0.0596(14) Uani 1 2 d S T P . .
C7 C 0.5605(3) 0.5305(3) 0.2544(4) 0.0668(11) Uani 1 1 d . . . . .
C18 C 1.0564(6) 0.7500 0.6770(4) 0.0690(17) Uani 1 2 d S T P . .
C11 C 0.8310(4) 0.5998(3) 0.0212(3) 0.0752(14) Uani 1 1 d . . . . .
C12 C 0.8237(7) 0.5154(4) 0.0414(6) 0.125(3) Uani 1 1 d . . . . .
H12A H 0.7606 0.5053 0.0650 0.187 Uiso 1 1 calc R U . . .
H12B H 0.8851 0.4992 0.0936 0.187 Uiso 1 1 calc R U . . .
H12C H 0.8205 0.4864 -0.0211 0.187 Uiso 1 1 calc R U . . .
C8 C 0.515(2) 0.538(2) 0.1339(17) 0.146(12) Uani 0.529 1 d . U P A 1
H8A H 0.5722 0.5476 0.1015 0.220 Uiso 0.529 1 calc R U P A 1
H8B H 0.4649 0.5803 0.1191 0.220 Uiso 0.529 1 calc R U P A 1
H8C H 0.4800 0.4894 0.1075 0.220 Uiso 0.529 1 calc R U P A 1
C9 C 0.4777(18) 0.5350(11) 0.313(2) 0.112(6) Uani 0.529 1 d . U P A 1
H9A H 0.5096 0.5264 0.3855 0.168 Uiso 0.529 1 calc R U P A 1
H9B H 0.4248 0.4954 0.2887 0.168 Uiso 0.529 1 calc R U P A 1
H9C H 0.4451 0.5861 0.3041 0.168 Uiso 0.529 1 calc R U P A 1
C10 C 0.627(2) 0.4566(16) 0.286(3) 0.198(16) Uani 0.529 1 d . U P A 1
H10A H 0.6449 0.4517 0.3604 0.297 Uiso 0.529 1 calc R U P A 1
H10B H 0.6915 0.4603 0.2628 0.297 Uiso 0.529 1 calc R U P A 1
H10C H 0.5875 0.4112 0.2558 0.297 Uiso 0.529 1 calc R U P A 1
C8B C 0.480(3) 0.5476(19) 0.161(3) 0.19(2) Uani 0.4709 1 d . U P A 2
H8BA H 0.4338 0.5881 0.1748 0.284 Uiso 0.4709 1 calc R U P A 2
H8BB H 0.4394 0.5009 0.1380 0.284 Uiso 0.4709 1 calc R U P A 2
H8BC H 0.5135 0.5651 0.1082 0.284 Uiso 0.4709 1 calc R U P A 2
C9B C 0.505(4) 0.537(3) 0.345(5) 0.29(3) Uani 0.4709 1 d . U P A 2
H9BA H 0.5581 0.5453 0.4090 0.436 Uiso 0.4709 1 calc R U P A 2
H9BB H 0.4674 0.4891 0.3502 0.436 Uiso 0.4709 1 calc R U P A 2
H9BC H 0.4565 0.5804 0.3333 0.436 Uiso 0.4709 1 calc R U P A 2
C10B C 0.6081(16) 0.4497(12) 0.257(2) 0.089(6) Uani 0.4709 1 d . U P A 2
H10D H 0.6606 0.4427 0.3214 0.133 Uiso 0.4709 1 calc R U P A 2
H10E H 0.6408 0.4438 0.2004 0.133 Uiso 0.4709 1 calc R U P A 2
H10F H 0.5531 0.4109 0.2520 0.133 Uiso 0.4709 1 calc R U P A 2
C13 C 0.9265(8) 0.6201(6) -0.0193(7) 0.167(4) Uani 1 1 d . . . . .
H13A H 0.9876 0.6264 0.0377 0.250 Uiso 1 1 calc R U . . .
H13B H 0.9133 0.6684 -0.0580 0.250 Uiso 1 1 calc R U . . .
H13C H 0.9394 0.5786 -0.0635 0.250 Uiso 1 1 calc R U . . .
C16 C 0.5092(7) 0.7500 0.5116(10) 0.147(5) Uani 1 2 d S T P . .
H16A H 0.4937 0.7974 0.4714 0.220 Uiso 1 1 d R U . . .
H16C H 0.4651 0.7500 0.5598 0.220 Uiso 1 2 d R U P . .
C14 C 0.7310(7) 0.6262(5) -0.0508(6) 0.154(4) Uani 1 1 d . . . . .
H14A H 0.6719 0.6138 -0.0221 0.230 Uiso 1 1 calc R U . . .
H14B H 0.7226 0.5999 -0.1161 0.230 Uiso 1 1 calc R U . . .
H14C H 0.7338 0.6821 -0.0608 0.230 Uiso 1 1 calc R U . . .
C17 C 0.6509(8) 0.6780(5) 0.6330(7) 0.160(4) Uani 1 1 d . . . . .
H17A H 0.7268 0.6727 0.6566 0.240 Uiso 1 1 calc R U . . .
H17B H 0.6225 0.6333 0.5912 0.240 Uiso 1 1 calc R U . . .
H17C H 0.6202 0.6807 0.6916 0.240 Uiso 1 1 calc R U . . .
C19 C 0.9784(19) 0.7500 0.7482(11) 0.147(10) Uani 0.5767 2 d S TU P B 1
H19A H 0.9060 0.7500 0.7081 0.221 Uiso 0.5767 2 d R U P B 1
H19B H 0.9912 0.7038 0.7911 0.221 Uiso 0.5767 1 d R U P B 1
C20 C 1.1177(15) 0.6761(11) 0.6910(10) 0.134(8) Uani 0.5767 1 d . U P B 1
H20A H 1.0729 0.6338 0.6580 0.200 Uiso 0.5767 1 calc R U P B 1
H20B H 1.1429 0.6651 0.7636 0.200 Uiso 0.5767 1 calc R U P B 1
H20C H 1.1773 0.6813 0.6605 0.200 Uiso 0.5767 1 calc R U P B 1
C19B C 1.1740(15) 0.7500 0.6575(18) 0.133(11) Uani 0.4233 2 d S TU P B 2
H19D H 1.1701 0.7500 0.5863 0.200 Uiso 0.4233 2 d R U P B 2
H19E H 1.2109 0.7038 0.6904 0.200 Uiso 0.4233 1 d R U P B 2
C20B C 1.045(2) 0.6786(15) 0.7284(15) 0.165(13) Uani 0.4233 1 d . U P B 2
H20D H 1.0354 0.6901 0.7962 0.248 Uiso 0.4233 1 calc R U P B 2
H20E H 1.1076 0.6470 0.7346 0.248 Uiso 0.4233 1 calc R U P B 2
H20F H 0.9841 0.6505 0.6893 0.248 Uiso 0.4233 1 calc R U P B 2
C3 C 1.2495(4) 0.5941(4) 0.4272(5) 0.0973(19) Uani 1 1 d . U . . .
H3A H 1.2503 0.6130 0.4953 0.146 Uiso 1 1 calc R U . . .
H3B H 1.2535 0.6379 0.3827 0.146 Uiso 1 1 calc R U . . .
H3C H 1.3093 0.5599 0.4308 0.146 Uiso 1 1 calc R U . . .
C4 C 1.1460(5) 0.5117(4) 0.2794(4) 0.0918(18) Uani 1 1 d . U . . .
H4A H 1.1614 0.5516 0.2341 0.138 Uiso 1 1 calc R U . . .
H4B H 1.0775 0.4891 0.2493 0.138 Uiso 1 1 calc R U . . .
H4C H 1.1994 0.4713 0.2890 0.138 Uiso 1 1 calc R U . . .
C5 C 1.1330(5) 0.4862(3) 0.4622(5) 0.0916(18) Uani 1 1 d . U . . .
H5A H 1.1310 0.5115 0.5262 0.137 Uiso 1 1 calc R U . . .
H5B H 1.1921 0.4504 0.4739 0.137 Uiso 1 1 calc R U . . .
H5C H 1.0680 0.4576 0.4364 0.137 Uiso 1 1 calc R U . . .
C64 C 0.190(2) 0.7500 0.146(3) 0.189(14) Uani 0.5 2 d DS TU P C 1
H64A H 0.1278 0.7500 0.1683 0.227 Uiso 0.5 2 calc R U P C 1
C66 C 0.3741(18) 0.7500 0.1687(16) 0.118(8) Uani 0.5 2 d DS TU P C 1
H66A H 0.4414 0.7500 0.2137 0.142 Uiso 0.5 2 calc R U P C 1
C61 C 0.373(2) 0.7500 0.0687(19) 0.207(16) Uani 0.5 2 d DS TU P C 1
C67 C 0.478(2) 0.7500 0.032(3) 0.30(3) Uani 0.5 2 d DS TU P C 1
H67A H 0.5535 0.7500 0.0574 0.362 Uiso 0.5 2 d R U P C 1
H67B H 0.4559 0.7038 -0.0095 0.362 Uiso 0.5 1 d R U P C 1
C62 C 0.278(2) 0.7500 -0.0023(19) 0.241(19) Uani 0.5 2 d DS TU P C 1
H62A H 0.2715 0.7500 -0.0734 0.289 Uiso 0.5 2 calc R U P C 1
C63 C 0.189(2) 0.7500 0.043(2) 0.24(2) Uani 0.5 2 d DS TU P C 1
H63A H 0.1224 0.7500 -0.0031 0.283 Uiso 0.5 2 calc R U P C 1
C65 C 0.290(3) 0.7500 0.2160(18) 0.193(16) Uani 0.5 2 d DS TU P C 1
H65A H 0.2997 0.7500 0.2875 0.231 Uiso 0.5 2 calc R U P C 1

loop_
_atom_site_aniso_label
_atom_site_aniso_U_11
_atom_site_aniso_U_22
_atom_site_aniso_U_33
_atom_site_aniso_U_23
_atom_site_aniso_U_13
_atom_site_aniso_U_12
Ti1 0.0367(4) 0.0359(4) 0.0276(4) 0.000 0.0043(3) 0.000
Ti2 0.0365(4) 0.0398(5) 0.0343(4) 0.000 0.0143(3) 0.000
Ti3 0.0364(4) 0.0480(4) 0.0338(4) -0.0112(2) 0.0105(2) -0.0032(2)
O1 0.0260(13) 0.0423(16) 0.0340(15) 0.000 0.0083(11) 0.000
O2 0.0364(11) 0.0305(10) 0.0340(11) 0.0011(8) 0.0105(9) -0.0005(8)
O3 0.0302(14) 0.0492(18) 0.0337(15) 0.000 0.0064(12) 0.000
O4 0.0442(13) 0.0436(13) 0.0475(14) 0.0040(10) 0.0048(10) 0.0072(9)
O5 0.0456(13) 0.0443(13) 0.0604(15) -0.0075(11) 0.0179(12) 0.0046(10)
O6 0.0455(13) 0.0546(15) 0.0597(16) -0.0209(12) 0.0146(11) -0.0118(11)
O7 0.0410(12) 0.0504(14) 0.0548(15) -0.0049(11) 0.0160(11) -0.0088(10)
O10 0.062(2) 0.060(2) 0.0286(16) 0.000 -0.0003(15) 0.000
O9 0.060(2) 0.058(2) 0.0454(19) 0.000 0.0286(17) 0.000
O8 0.0519(15) 0.083(2) 0.0417(13) -0.0238(13) 0.0131(11) -0.0042(13)
C1 0.0445(17) 0.0429(18) 0.0508(19) 0.0071(14) 0.0201(15) 0.0062(14)
C6 0.0441(18) 0.055(2) 0.051(2) -0.0068(16) 0.0108(15) -0.0124(15)
C2 0.056(2) 0.062(2) 0.061(2) 0.0070(18) 0.0229(18) 0.0198(18)
C15 0.071(3) 0.065(3) 0.057(3) 0.000 0.042(3) 0.000
C7 0.050(2) 0.065(3) 0.084(3) -0.012(2) 0.015(2) -0.0177(19)
C18 0.082(4) 0.082(4) 0.032(3) 0.000 -0.009(3) 0.000
C11 0.104(4) 0.084(3) 0.041(2) -0.028(2) 0.024(2) -0.016(3)
C12 0.184(8) 0.083(4) 0.120(5) -0.039(4) 0.062(5) -0.007(4)
C8 0.123(18) 0.23(3) 0.076(8) -0.037(11) 0.002(10) -0.119(17)
C9 0.096(9) 0.081(8) 0.192(17) -0.054(10) 0.099(11) -0.062(9)
C10 0.17(2) 0.069(12) 0.32(4) 0.026(18) -0.01(2) -0.059(12)
C8B 0.12(2) 0.136(19) 0.23(4) 0.06(2) -0.10(2) -0.076(16)
C9B 0.27(4) 0.25(3) 0.46(7) -0.25(4) 0.29(5) -0.23(3)
C10B 0.072(8) 0.053(8) 0.157(14) -0.047(8) 0.058(9) -0.030(6)
C13 0.218(10) 0.171(8) 0.165(8) -0.085(7) 0.150(8) -0.066(7)
C16 0.061(5) 0.226(15) 0.164(11) 0.000 0.048(6) 0.000
C14 0.181(9) 0.137(7) 0.096(5) -0.018(5) -0.055(5) -0.028(6)
C17 0.205(9) 0.139(6) 0.186(9) 0.089(6) 0.143(8) 0.044(6)
C19 0.152(18) 0.27(3) 0.032(7) 0.000 0.037(9) 0.000
C20 0.171(17) 0.145(13) 0.058(7) -0.002(7) -0.025(8) 0.081(13)
C19B 0.050(10) 0.24(4) 0.083(15) 0.000 -0.027(10) 0.000
C20B 0.24(4) 0.15(2) 0.062(12) 0.052(13) -0.054(15) -0.05(2)
C3 0.048(2) 0.121(5) 0.123(5) 0.000(4) 0.022(3) 0.014(3)
C4 0.091(4) 0.110(4) 0.083(3) -0.005(3) 0.038(3) 0.046(3)
C5 0.102(4) 0.078(3) 0.107(4) 0.037(3) 0.050(3) 0.036(3)
C64 0.23(3) 0.105(18) 0.23(3) 0.000 0.05(3) 0.000
C66 0.140(16) 0.066(9) 0.099(13) 0.000 -0.065(12) 0.000
C61 0.30(4) 0.060(12) 0.26(4) 0.000 0.08(3) 0.000
C67 0.23(4) 0.09(2) 0.54(8) 0.000 0.02(5) 0.000
C62 0.19(3) 0.30(3) 0.15(2) 0.000 -0.11(2) 0.000
C63 0.14(3) 0.29(4) 0.21(3) 0.000 -0.09(2) 0.000
C65 0.34(4) 0.048(10) 0.16(2) 0.000 0.00(3) 0.000

_geom_special_details            
;
 All esds (except the esd in the dihedral angle between two l.s. planes)
 are estimated using the full covariance matrix.  The cell esds are taken
 into account individually in the estimation of esds in distances, angles
 and torsion angles; correlations between esds in cell parameters are only
 used when they are defined by crystal symmetry.  An approximate (isotropic)
 treatment of cell esds is used for estimating esds involving l.s. planes.
;

loop_
_geom_bond_atom_site_label_1
_geom_bond_atom_site_label_2
_geom_bond_distance
_geom_bond_site_symmetry_2
_geom_bond_publ_flag
Ti1 O10 1.752(3) . ?
Ti1 O2 1.915(2) 4_575 ?
Ti1 O2 1.915(2) . ?
Ti1 O4 2.033(2) . ?
Ti1 O4 2.033(2) 4_575 ?
Ti1 O1 2.106(3) . ?
Ti1 Ti2 2.9006(13) . ?
Ti1 Ti3 3.0249(11) 4_575 ?
Ti1 Ti3 3.0249(11) . ?
Ti2 O9 1.761(3) . ?
Ti2 O2 1.917(2) . ?
Ti2 O2 1.917(2) 4_575 ?
Ti2 O7 2.064(2) 4_575 ?
Ti2 O7 2.064(2) . ?
Ti2 O3 2.072(3) . ?
Ti2 Ti3 3.0154(10) 4_575 ?
Ti2 Ti3 3.0154(10) . ?
Ti3 O8 1.756(2) . ?
Ti3 O1 1.9139(19) . ?
Ti3 O3 1.925(2) . ?
Ti3 O6 2.032(3) . ?
Ti3 O5 2.043(3) . ?
Ti3 O2 2.105(2) . ?
Ti3 Ti3 2.8999(13) 4_575 ?
O1 Ti3 1.9138(19) 4_575 ?
O3 Ti3 1.925(2) 4_575 ?
O4 C1 1.254(4) . ?
O5 C1 1.270(4) . ?
O6 C6 1.268(4) . ?
O7 C6 1.268(5) . ?
O10 C18 1.422(6) . ?
O9 C15 1.414(6) . ?
O8 C11 1.408(4) . ?
C1 C2 1.536(5) . ?
C6 C7 1.517(5) . ?
C2 C5 1.522(6) . ?
C2 C4 1.519(6) . ?
C2 C3 1.544(7) . ?
C15 C17 1.464(7) . ?
C15 C17 1.464(7) 4_575 ?
C15 C16 1.524(12) . ?
C7 C9 1.48(2) . ?
C7 C8B 1.44(3) . ?
C7 C10B 1.50(2) . ?
C7 C10 1.52(3) . ?
C7 C8 1.57(2) . ?
C7 C9B 1.55(5) . ?
C18 C20B 1.42(2) 4_575 ?
C18 C20B 1.42(2) . ?
C18 C20 1.472(14) 4_575 ?
C18 C20 1.472(14) . ?
C18 C19 1.546(18) . ?
C18 C19B 1.61(2) . ?
C11 C12 1.465(9) . ?
C11 C14 1.480(9) . ?
C11 C13 1.507(8) . ?
C12 H12A 0.9600 . ?
C12 H12B 0.9600 . ?
C12 H12C 0.9600 . ?
C8 H8A 0.9600 . ?
C8 H8B 0.9600 . ?
C8 H8C 0.9600 . ?
C9 H9A 0.9600 . ?
C9 H9B 0.9600 . ?
C9 H9C 0.9600 . ?
C10 H10A 0.9600 . ?
C10 H10B 0.9600 . ?
C10 H10C 0.9600 . ?
C8B H8BA 0.9600 . ?
C8B H8BB 0.9600 . ?
C8B H8BC 0.9600 . ?
C9B H9BA 0.9600 . ?
C9B H9BB 0.9600 . ?
C9B H9BC 0.9600 . ?
C10B H10D 0.9600 . ?
C10B H10E 0.9600 . ?
C10B H10F 0.9600 . ?
C13 H13A 0.9600 . ?
C13 H13B 0.9600 . ?
C13 H13C 0.9600 . ?
C16 H16A 0.9601 . ?
C16 H16C 0.9589 . ?
C14 H14A 0.9600 . ?
C14 H14B 0.9600 . ?
C14 H14C 0.9600 . ?
C17 H17A 0.9600 . ?
C17 H17B 0.9600 . ?
C17 H17C 0.9600 . ?
C19 H19A 0.9600 . ?
C19 H19B 0.9601 . ?
C20 H20A 0.9600 . ?
C20 H20B 0.9600 . ?
C20 H20C 0.9600 . ?
C19B H19D 0.9374 . ?
C19B H19E 0.9656 . ?
C20B H20D 0.9600 . ?
C20B H20E 0.9600 . ?
C20B H20F 0.9600 . ?
C3 H3A 0.9600 . ?
C3 H3B 0.9600 . ?
C3 H3C 0.9600 . ?
C4 H4A 0.9600 . ?
C4 H4B 0.9600 . ?
C4 H4C 0.9600 . ?
C5 H5A 0.9600 . ?
C5 H5B 0.9600 . ?
C5 H5C 0.9600 . ?
C64 C63 1.368(17) . ?
C64 C65 1.401(17) . ?
C64 H64A 0.9300 . ?
C66 C61 1.328(16) . ?
C66 C65 1.380(17) . ?
C66 H66A 0.9300 . ?
C61 C62 1.356(17) . ?
C61 C67 1.551(16) . ?
C67 H67A 0.9600 . ?
C67 H67B 0.9601 . ?
C62 C63 1.423(5) . ?
C62 H62A 0.9300 . ?
C63 H63A 0.9300 . ?
C65 H65A 0.9300 . ?

loop_
_geom_angle_atom_site_label_1
_geom_angle_atom_site_label_2
_geom_angle_atom_site_label_3
_geom_angle
_geom_angle_site_symmetry_1
_geom_angle_site_symmetry_3
_geom_angle_publ_flag
O10 Ti1 O2 105.32(12) . 4_575 ?
O10 Ti1 O2 105.32(12) . . ?
O2 Ti1 O2 81.17(13) 4_575 . ?
O10 Ti1 O4 92.54(12) . . ?
O2 Ti1 O4 161.57(10) 4_575 . ?
O2 Ti1 O4 89.89(10) . . ?
O10 Ti1 O4 92.54(12) . 4_575 ?
O2 Ti1 O4 89.88(10) 4_575 4_575 ?
O2 Ti1 O4 161.57(10) . 4_575 ?
O4 Ti1 O4 93.89(14) . 4_575 ?
O10 Ti1 O1 170.38(16) . . ?
O2 Ti1 O1 81.87(9) 4_575 . ?
O2 Ti1 O1 81.87(9) . . ?
O4 Ti1 O1 80.93(9) . . ?
O4 Ti1 O1 80.93(9) 4_575 . ?
O10 Ti1 Ti2 105.53(14) . . ?
O2 Ti1 Ti2 40.82(6) 4_575 . ?
O2 Ti1 Ti2 40.82(6) . . ?
O4 Ti1 Ti2 130.13(7) . . ?
O4 Ti1 Ti2 130.13(7) 4_575 . ?
O1 Ti1 Ti2 84.09(8) . . ?
O10 Ti1 Ti3 146.66(7) . 4_575 ?
O2 Ti1 Ti3 43.62(7) 4_575 4_575 ?
O2 Ti1 Ti3 84.24(7) . 4_575 ?
O4 Ti1 Ti3 119.76(8) . 4_575 ?
O4 Ti1 Ti3 78.22(8) 4_575 4_575 ?
O1 Ti1 Ti3 38.85(5) . 4_575 ?
Ti2 Ti1 Ti3 61.14(3) . 4_575 ?
O10 Ti1 Ti3 146.66(7) . . ?
O2 Ti1 Ti3 84.24(7) 4_575 . ?
O2 Ti1 Ti3 43.62(7) . . ?
O4 Ti1 Ti3 78.22(8) . . ?
O4 Ti1 Ti3 119.76(8) 4_575 . ?
O1 Ti1 Ti3 38.85(5) . . ?
Ti2 Ti1 Ti3 61.14(3) . . ?
Ti3 Ti1 Ti3 57.28(3) 4_575 . ?
O9 Ti2 O2 104.69(12) . . ?
O9 Ti2 O2 104.69(12) . 4_575 ?
O2 Ti2 O2 81.09(13) . 4_575 ?
O9 Ti2 O7 91.34(12) . 4_575 ?
O2 Ti2 O7 162.55(10) . 4_575 ?
O2 Ti2 O7 88.29(10) 4_575 4_575 ?
O9 Ti2 O7 91.34(12) . . ?
O2 Ti2 O7 88.29(10) . . ?
O2 Ti2 O7 162.54(10) 4_575 . ?
O7 Ti2 O7 98.36(15) 4_575 . ?
O9 Ti2 O3 170.39(16) . . ?
O2 Ti2 O3 82.51(9) . . ?
O2 Ti2 O3 82.51(9) 4_575 . ?
O7 Ti2 O3 82.41(9) 4_575 . ?
O7 Ti2 O3 82.41(9) . . ?
O9 Ti2 Ti1 104.68(14) . . ?
O2 Ti2 Ti1 40.78(6) . . ?
O2 Ti2 Ti1 40.78(6) 4_575 . ?
O7 Ti2 Ti1 128.76(7) 4_575 . ?
O7 Ti2 Ti1 128.76(7) . . ?
O3 Ti2 Ti1 84.94(9) . . ?
O9 Ti2 Ti3 146.34(7) . 4_575 ?
O2 Ti2 Ti3 84.49(7) . 4_575 ?
O2 Ti2 Ti3 43.85(7) 4_575 4_575 ?
O7 Ti2 Ti3 78.28(7) 4_575 4_575 ?
O7 Ti2 Ti3 121.64(8) . 4_575 ?
O3 Ti2 Ti3 39.24(6) . 4_575 ?
Ti1 Ti2 Ti3 61.46(3) . 4_575 ?
O9 Ti2 Ti3 146.34(7) . . ?
O2 Ti2 Ti3 43.85(7) . . ?
O2 Ti2 Ti3 84.49(7) 4_575 . ?
O7 Ti2 Ti3 121.64(8) 4_575 . ?
O7 Ti2 Ti3 78.28(7) . . ?
O3 Ti2 Ti3 39.24(6) . . ?
Ti1 Ti2 Ti3 61.47(3) . . ?
Ti3 Ti2 Ti3 57.48(3) 4_575 . ?
O8 Ti3 O1 104.58(13) . . ?
O8 Ti3 O3 102.62(14) . . ?
O1 Ti3 O3 81.29(10) . . ?
O8 Ti3 O6 92.09(13) . . ?
O1 Ti3 O6 162.47(11) . . ?
O3 Ti3 O6 89.89(10) . . ?
O8 Ti3 O5 93.44(13) . . ?
O1 Ti3 O5 88.05(10) . . ?
O3 Ti3 O5 162.51(12) . . ?
O6 Ti3 O5 96.49(11) . . ?
O8 Ti3 O2 172.70(12) . . ?
O1 Ti3 O2 81.93(11) . . ?
O3 Ti3 O2 81.44(11) . . ?
O6 Ti3 O2 81.78(10) . . ?
O5 Ti3 O2 83.37(10) . . ?
O8 Ti3 Ti3 102.63(11) . 4_575 ?
O1 Ti3 Ti3 40.74(7) . 4_575 ?
O3 Ti3 Ti3 41.14(7) . 4_575 ?
O6 Ti3 Ti3 130.67(8) . 4_575 ?
O5 Ti3 Ti3 128.56(7) . 4_575 ?
O2 Ti3 Ti3 84.44(6) . 4_575 ?
O8 Ti3 Ti2 143.58(10) . . ?
O1 Ti3 Ti2 84.21(8) . . ?
O3 Ti3 Ti2 42.90(9) . . ?
O6 Ti3 Ti2 79.06(7) . . ?
O5 Ti3 Ti2 122.48(8) . . ?
O2 Ti3 Ti2 39.11(6) . . ?
Ti3 Ti3 Ti2 61.259(15) 4_575 . ?
O8 Ti3 Ti1 146.84(10) . . ?
O1 Ti3 Ti1 43.66(9) . . ?
O3 Ti3 Ti1 84.03(9) . . ?
O6 Ti3 Ti1 120.63(8) . . ?
O5 Ti3 Ti1 78.70(8) . . ?
O2 Ti3 Ti1 38.88(6) . . ?
Ti3 Ti3 Ti1 61.357(16) 4_575 . ?
Ti2 Ti3 Ti1 57.40(3) . . ?
Ti3 O1 Ti3 98.51(13) 4_575 . ?
Ti3 O1 Ti1 97.49(10) 4_575 . ?
Ti3 O1 Ti1 97.49(10) . . ?
Ti1 O2 Ti2 98.40(10) . . ?
Ti1 O2 Ti3 97.50(9) . . ?
Ti2 O2 Ti3 97.04(9) . . ?
Ti3 O3 Ti3 97.71(13) 4_575 . ?
Ti3 O3 Ti2 97.87(11) 4_575 . ?
Ti3 O3 Ti2 97.87(11) . . ?
C1 O4 Ti1 129.4(2) . . ?
C1 O5 Ti3 126.8(2) . . ?
C6 O6 Ti3 128.8(2) . . ?
C6 O7 Ti2 128.1(2) . . ?
C18 O10 Ti1 158.0(4) . . ?
C15 O9 Ti2 163.4(4) . . ?
C11 O8 Ti3 161.2(3) . . ?
O4 C1 O5 124.3(3) . . ?
O4 C1 C2 118.1(3) . . ?
O5 C1 C2 117.5(3) . . ?
O6 C6 O7 123.6(3) . . ?
O6 C6 C7 116.7(3) . . ?
O7 C6 C7 119.7(3) . . ?
C5 C2 C4 111.9(5) . . ?
C5 C2 C3 108.6(4) . . ?
C4 C2 C3 110.6(4) . . ?
C5 C2 C1 107.0(3) . . ?
C4 C2 C1 110.1(3) . . ?
C3 C2 C1 108.6(4) . . ?
O9 C15 C17 107.9(4) . . ?
O9 C15 C17 107.9(4) . 4_575 ?
C17 C15 C17 113.3(10) . 4_575 ?
O9 C15 C16 106.3(6) . . ?
C17 C15 C16 110.5(5) . . ?
C17 C15 C16 110.5(5) 4_575 . ?
C8B C7 C10B 114.3(18) . . ?
C9 C7 C10 109.3(16) . . ?
C9 C7 C6 114.8(9) . . ?
C8B C7 C6 109.8(12) . . ?
C10B C7 C6 114.1(7) . . ?
C10 C7 C6 103.6(10) . . ?
C9 C7 C8 113.4(16) . . ?
C10 C7 C8 113.2(19) . . ?
C6 C7 C8 102.1(10) . . ?
C8B C7 C9B 107(3) . . ?
C10B C7 C9B 108(2) . . ?
C6 C7 C9B 103.2(12) . . ?
C20B C18 C20B 117(3) 4_575 . ?
C20B C18 O10 110.5(9) 4_575 . ?
C20B C18 O10 110.6(9) . . ?
O10 C18 C20 107.7(6) . 4_575 ?
O10 C18 C20 107.7(6) . . ?
C20 C18 C20 116.9(19) 4_575 . ?
O10 C18 C19 104.6(9) . . ?
C20 C18 C19 109.6(9) 4_575 . ?
C20 C18 C19 109.6(9) . . ?
C20B C18 C19B 107.1(15) 4_575 . ?
C20B C18 C19B 107.1(15) . . ?
O10 C18 C19B 102.9(9) . . ?
O8 C11 C12 109.5(4) . . ?
O8 C11 C14 107.6(5) . . ?
C12 C11 C14 109.2(6) . . ?
O8 C11 C13 106.3(5) . . ?
C12 C11 C13 112.7(7) . . ?
C14 C11 C13 111.3(7) . . ?
C11 C12 H12A 109.5 . . ?
C11 C12 H12B 109.5 . . ?
H12A C12 H12B 109.5 . . ?
C11 C12 H12C 109.5 . . ?
H12A C12 H12C 109.5 . . ?
H12B C12 H12C 109.5 . . ?
C7 C8 H8A 109.5 . . ?
C7 C8 H8B 109.5 . . ?
H8A C8 H8B 109.5 . . ?
C7 C8 H8C 109.5 . . ?
H8A C8 H8C 109.5 . . ?
H8B C8 H8C 109.5 . . ?
C7 C9 H9A 109.5 . . ?
C7 C9 H9B 109.5 . . ?
H9A C9 H9B 109.5 . . ?
C7 C9 H9C 109.5 . . ?
H9A C9 H9C 109.5 . . ?
H9B C9 H9C 109.5 . . ?
C7 C10 H10A 109.5 . . ?
C7 C10 H10B 109.5 . . ?
H10A C10 H10B 109.5 . . ?
C7 C10 H10C 109.5 . . ?
H10A C10 H10C 109.5 . . ?
H10B C10 H10C 109.5 . . ?
C7 C8B H8BA 109.5 . . ?
C7 C8B H8BB 109.5 . . ?
H8BA C8B H8BB 109.5 . . ?
C7 C8B H8BC 109.5 . . ?
H8BA C8B H8BC 109.5 . . ?
H8BB C8B H8BC 109.5 . . ?
C7 C9B H9BA 109.5 . . ?
C7 C9B H9BB 109.5 . . ?
H9BA C9B H9BB 109.5 . . ?
C7 C9B H9BC 109.5 . . ?
H9BA C9B H9BC 109.5 . . ?
H9BB C9B H9BC 109.5 . . ?
C7 C10B H10D 109.5 . . ?
C7 C10B H10E 109.5 . . ?
H10D C10B H10E 109.5 . . ?
C7 C10B H10F 109.5 . . ?
H10D C10B H10F 109.5 . . ?
H10E C10B H10F 109.5 . . ?
C11 C13 H13A 109.5 . . ?
C11 C13 H13B 109.5 . . ?
H13A C13 H13B 109.5 . . ?
C11 C13 H13C 109.5 . . ?
H13A C13 H13C 109.5 . . ?
H13B C13 H13C 109.5 . . ?
C15 C16 H16A 109.7 . . ?
C15 C16 H16C 109.0 . . ?
H16A C16 H16C 107.2 . . ?
C11 C14 H14A 109.5 . . ?
C11 C14 H14B 109.5 . . ?
H14A C14 H14B 109.5 . . ?
C11 C14 H14C 109.5 . . ?
H14A C14 H14C 109.5 . . ?
H14B C14 H14C 109.5 . . ?
C15 C17 H17A 109.5 . . ?
C15 C17 H17B 109.5 . . ?
H17A C17 H17B 109.5 . . ?
C15 C17 H17C 109.5 . . ?
H17A C17 H17C 109.5 . . ?
H17B C17 H17C 109.5 . . ?
C18 C19 H19A 110.9 . . ?
C18 C19 H19B 108.8 . . ?
H19A C19 H19B 109.5 . . ?
C18 C20 H20A 109.5 . . ?
C18 C20 H20B 109.5 . . ?
H20A C20 H20B 109.5 . . ?
C18 C20 H20C 109.5 . . ?
H20A C20 H20C 109.5 . . ?
H20B C20 H20C 109.5 . . ?
C18 C19B H19D 110.1 . . ?
C18 C19B H19E 108.1 . . ?
H19D C19B H19E 110.9 . . ?
C18 C20B H20D 109.5 . . ?
C18 C20B H20E 109.5 . . ?
H20D C20B H20E 109.5 . . ?
C18 C20B H20F 109.5 . . ?
H20D C20B H20F 109.5 . . ?
H20E C20B H20F 109.5 . . ?
C2 C3 H3A 109.5 . . ?
C2 C3 H3B 109.5 . . ?
H3A C3 H3B 109.5 . . ?
C2 C3 H3C 109.5 . . ?
H3A C3 H3C 109.5 . . ?
H3B C3 H3C 109.5 . . ?
C2 C4 H4A 109.5 . . ?
C2 C4 H4B 109.5 . . ?
H4A C4 H4B 109.5 . . ?
C2 C4 H4C 109.5 . . ?
H4A C4 H4C 109.5 . . ?
H4B C4 H4C 109.5 . . ?
C2 C5 H5A 109.5 . . ?
C2 C5 H5B 109.5 . . ?
H5A C5 H5B 109.5 . . ?
C2 C5 H5C 109.5 . . ?
H5A C5 H5C 109.5 . . ?
H5B C5 H5C 109.5 . . ?
C63 C64 C65 116.7(17) . . ?
C63 C64 H64A 121.6 . . ?
C65 C64 H64A 121.6 . . ?
C61 C66 C65 129.8(17) . . ?
C61 C66 H66A 115.1 . . ?
C65 C66 H66A 115.1 . . ?
C66 C61 C62 119.0(19) . . ?
C66 C61 C67 121.4(18) . . ?
C62 C61 C67 119.7(17) . . ?
C61 C67 H67A 142.1 . . ?
C61 C67 H67B 91.5 . . ?
H67A C67 H67B 109.5 . . ?
C61 C62 C63 113(2) . . ?
C61 C62 H62A 123.3 . . ?
C63 C62 H62A 123.3 . . ?
C64 C63 C62 127.7(19) . . ?
C64 C63 H63A 116.1 . . ?
C62 C63 H63A 116.1 . . ?
C66 C65 C64 113.5(16) . . ?
C66 C65 H65A 123.3 . . ?
C64 C65 H65A 123.3 . . ?

loop_
_geom_torsion_atom_site_label_1
_geom_torsion_atom_site_label_2
_geom_torsion_atom_site_label_3
_geom_torsion_atom_site_label_4
_geom_torsion
_geom_torsion_site_symmetry_1
_geom_torsion_site_symmetry_2
_geom_torsion_site_symmetry_3
_geom_torsion_site_symmetry_4
_geom_torsion_publ_flag
O2 Ti1 O10 C18 -137.58(7) 4_575 . . . ?
O2 Ti1 O10 C18 137.58(7) . . . . ?
O4 Ti1 O10 C18 47.01(7) . . . . ?
O4 Ti1 O10 C18 -47.01(7) 4_575 . . . ?
Ti2 Ti1 O10 C18 180.000(3) . . . . ?
Ti3 Ti1 O10 C18 -119.29(18) 4_575 . . . ?
Ti3 Ti1 O10 C18 119.29(18) . . . . ?
O2 Ti2 O9 C15 -137.78(7) . . . . ?
O2 Ti2 O9 C15 137.78(7) 4_575 . . . ?
O7 Ti2 O9 C15 49.20(7) 4_575 . . . ?
O7 Ti2 O9 C15 -49.20(7) . . . . ?
Ti1 Ti2 O9 C15 180.000(5) . . . . ?
Ti3 Ti2 O9 C15 119.84(18) 4_575 . . . ?
Ti3 Ti2 O9 C15 -119.84(18) . . . . ?
O1 Ti3 O8 C11 154.5(9) . . . . ?
O3 Ti3 O8 C11 -121.3(10) . . . . ?
O6 Ti3 O8 C11 -31.0(10) . . . . ?
O5 Ti3 O8 C11 65.7(10) . . . . ?
Ti3 Ti3 O8 C11 -163.5(9) 4_575 . . . ?
Ti2 Ti3 O8 C11 -105.3(10) . . . . ?
Ti1 Ti3 O8 C11 140.2(9) . . . . ?
Ti1 O4 C1 O5 -3.1(5) . . . . ?
Ti1 O4 C1 C2 179.2(2) . . . . ?
Ti3 O5 C1 O4 18.1(5) . . . . ?
Ti3 O5 C1 C2 -164.2(2) . . . . ?
Ti3 O6 C6 O7 -6.7(6) . . . . ?
Ti3 O6 C6 C7 172.3(3) . . . . ?
Ti2 O7 C6 O6 -9.4(6) . . . . ?
Ti2 O7 C6 C7 171.7(3) . . . . ?
O4 C1 C2 C5 87.5(5) . . . . ?
O5 C1 C2 C5 -90.4(5) . . . . ?
O4 C1 C2 C4 -150.7(4) . . . . ?
O5 C1 C2 C4 31.4(5) . . . . ?
O4 C1 C2 C3 -29.5(5) . . . . ?
O5 C1 C2 C3 152.6(4) . . . . ?
Ti2 O9 C15 C17 118.6(6) . . . . ?
Ti2 O9 C15 C17 -118.6(6) . . . 4_575 ?
Ti2 O9 C15 C16 0.000(5) . . . . ?
O6 C6 C7 C9 165.9(13) . . . . ?
O7 C6 C7 C9 -15.1(14) . . . . ?
O6 C6 C7 C8B -95.7(19) . . . . ?
O7 C6 C7 C8B 83.3(19) . . . . ?
O6 C6 C7 C10B 34.1(12) . . . . ?
O7 C6 C7 C10B -146.9(12) . . . . ?
O6 C6 C7 C10 46.8(15) . . . . ?
O7 C6 C7 C10 -134.2(15) . . . . ?
O6 C6 C7 C8 -70.9(14) . . . . ?
O7 C6 C7 C8 108.1(14) . . . . ?
O6 C6 C7 C9B 151(3) . . . . ?
O7 C6 C7 C9B -30(3) . . . . ?
Ti1 O10 C18 C20B 114.1(17) . . . 4_575 ?
Ti1 O10 C18 C20B -114.1(17) . . . . ?
Ti1 O10 C18 C20 63.4(10) . . . 4_575 ?
Ti1 O10 C18 C20 -63.4(10) . . . . ?
Ti1 O10 C18 C19 180.000(4) . . . . ?
Ti1 O10 C18 C19B 0.000(5) . . . . ?
Ti3 O8 C11 C12 -13.5(13) . . . . ?
Ti3 O8 C11 C14 105.1(10) . . . . ?
Ti3 O8 C11 C13 -135.5(9) . . . . ?
C65 C66 C61 C62 0.000(3) . . . . ?
C65 C66 C61 C67 180.000(1) . . . . ?
C66 C61 C62 C63 0.000(2) . . . . ?
C67 C61 C62 C63 180.000(1) . . . . ?
C65 C64 C63 C62 0.000(2) . . . . ?
C61 C62 C63 C64 0.000(1) . . . . ?
C61 C66 C65 C64 0.000(4) . . . . ?
C63 C64 C65 C66 0.000(2) . . . . ?

_refine_diff_density_max         1.323
_refine_diff_density_min         -0.438
_refine_diff_density_rms         0.106

_shelxl_version_number           2013-4

_shelx_res_file                  
;
TITL ti7109 in P2(1)/m
CELL 0.71073  12.962  16.979  13.317  90.00 104.16  90.00
ZERR   2.00   0.003   0.003   0.003   0.00   0.03   0.00
LATT  1
SYMM -X, .5+Y, -Z
SFAC C H O TI
UNIT 79 152 32 8

SHEL 17 0.80

SIZE  0.8 0.4 0.2
TEMP  19

L.S. 50
BOND  $H
FMAP 2
PLAN 10

ACTA
CONF
ISOR  C3 C4 C5
ISOR  C8 C9 C10 C8B C9B C10B
ISOR  C19 C20 C19B C20B
ISOR 0.06 0.12 C61 C63 C64 C65 C67
ISOR 0.04 0.08 C62 C66
DFIX 1.40 0.005 C62 C63

OMIT  -3
OMIT  -9   0   1
OMIT   1   3   0
OMIT   1   1   0
OMIT   1   2   3

WGHT    0.165500    1.004100
FVAR       3.82224
TI1   4    0.955854    0.750000    0.439146    10.50000    0.03673    0.03589 =
         0.02756    0.00000    0.00428    0.00000
TI2   4    0.725134    0.750000    0.378772    10.50000    0.03651    0.03975 =
         0.03426    0.00000    0.01434    0.00000
TI3   4    0.844113    0.664602    0.243368    11.00000    0.03645    0.04802 =
         0.03384   -0.01122    0.01052   -0.00316
O1    3    0.942754    0.750000    0.278353    10.50000    0.02598    0.04226 =
         0.03401    0.00000    0.00826    0.00000
O2    3    0.840818    0.676623    0.399859    11.00000    0.03640    0.03050 =
         0.03400    0.00106    0.01052   -0.00052
O3    3    0.743781    0.750000    0.228617    10.50000    0.03022    0.04918 =
         0.03373    0.00000    0.00644    0.00000
O4    3    1.060974    0.662516    0.432272    11.00000    0.04415    0.04356 =
         0.04754    0.00404    0.00480    0.00723
O5    3    0.967340    0.589593    0.302136    11.00000    0.04564    0.04426 =
         0.06041   -0.00746    0.01785    0.00462
O6    3    0.725501    0.586616    0.244517    11.00000    0.04548    0.05462 =
         0.05968   -0.02093    0.01457   -0.01181
O7    3    0.623130    0.658003    0.322913    11.00000    0.04097    0.05045 =
         0.05477   -0.00495    0.01604   -0.00878
O10   3    0.989821    0.750000    0.574857    10.50000    0.06207    0.05989 =
         0.02862    0.00000   -0.00026    0.00000
O9    3    0.686268    0.750000    0.496533    10.50000    0.05986    0.05832 =
         0.04542    0.00000    0.02859    0.00000
O8    3    0.842414    0.641984    0.114328    11.00000    0.05194    0.08349 =
         0.04169   -0.02379    0.01309   -0.00415
C1    1    1.051268    0.605171    0.371354    11.00000    0.04451    0.04289 =
         0.05075    0.00711    0.02013    0.00615
C6    1    0.641827    0.596489    0.276284    11.00000    0.04405    0.05467 =
         0.05075   -0.00684    0.01080   -0.01241
C2    1    1.145441    0.548105    0.383381    11.00000    0.05580    0.06226 =
         0.06050    0.00703    0.02294    0.01984
C15   1    0.625565    0.750000    0.571460    10.50000    0.07105    0.06501 =
         0.05671    0.00000    0.04225    0.00000
C7    1    0.560531    0.530475    0.254387    11.00000    0.05031    0.06547 =
         0.08372   -0.01150    0.01481   -0.01767
C18   1    1.056443    0.750000    0.676998    10.50000    0.08173    0.08171 =
         0.03157    0.00000   -0.00894    0.00000
C11   1    0.830971    0.599783    0.021240    11.00000    0.10369    0.08390 =
         0.04128   -0.02840    0.02378   -0.01576
C12   1    0.823656    0.515411    0.041425    11.00000    0.18426    0.08345 =
         0.11989   -0.03932    0.06203   -0.00667
AFIX  33
H12A  2    0.760599    0.505303    0.064998    11.00000   -1.50000
H12B  2    0.885058    0.499231    0.093637    11.00000   -1.50000
H12C  2    0.820518    0.486406   -0.021131    11.00000   -1.50000
AFIX   0
PART   1
C8    1    0.514979    0.537622    0.133877    10.52905    0.12322    0.22903 =
         0.07559   -0.03725    0.00241   -0.11907
AFIX  33
H8A   2    0.572224    0.547567    0.101495    10.52905   -1.50000
H8B   2    0.464916    0.580267    0.119109    10.52905   -1.50000
H8C   2    0.480002    0.489394    0.107493    10.52905   -1.50000
AFIX   0
C9    1    0.477732    0.534984    0.313325    10.52905    0.09574    0.08115 =
         0.19242   -0.05420    0.09905   -0.06214
AFIX  33
H9A   2    0.509607    0.526444    0.385515    10.52905   -1.50000
H9B   2    0.424766    0.495356    0.288660    10.52905   -1.50000
H9C   2    0.445061    0.586078    0.304068    10.52905   -1.50000
AFIX   0
C10   1    0.627267    0.456578    0.286292    10.52905    0.16626    0.06924 =
         0.32260    0.02648   -0.00795   -0.05916
AFIX  33
H10A  2    0.644853    0.451700    0.360354    10.52905   -1.50000
H10B  2    0.691473    0.460286    0.262817    10.52905   -1.50000
H10C  2    0.587507    0.411205    0.255798    10.52905   -1.50000
AFIX   0
PART   2
C8B   1    0.480083    0.547585    0.161032    10.47095    0.12186    0.13626 =
         0.23451    0.06189   -0.10013   -0.07555
AFIX  33
H8BA  2    0.433806    0.588145    0.174809    10.47095   -1.50000
H8BB  2    0.439399    0.500885    0.138031    10.47095   -1.50000
H8BC  2    0.513536    0.565104    0.108161    10.47095   -1.50000
AFIX   0
C9B   1    0.505350    0.536942    0.345414    10.47095    0.27113    0.24543 =
         0.46198   -0.24604    0.29381   -0.23260
AFIX  33
H9BA  2    0.558139    0.545330    0.408976    10.47095   -1.50000
H9BB  2    0.467372    0.489101    0.350211    10.47095   -1.50000
H9BC  2    0.456469    0.580386    0.333259    10.47095   -1.50000
AFIX   0
C10B  1    0.608068    0.449680    0.257293    10.47095    0.07232    0.05279 =
         0.15657   -0.04708    0.05825   -0.03007
AFIX  33
H10D  2    0.660631    0.442709    0.321353    10.47095   -1.50000
H10E  2    0.640846    0.443776    0.200421    10.47095   -1.50000
H10F  2    0.553141    0.410862    0.251964    10.47095   -1.50000
AFIX   0
PART   0
C13   1    0.926492    0.620134   -0.019312    11.00000    0.21773    0.17075 =
         0.16549   -0.08476    0.15005   -0.06574
AFIX  33
H13A  2    0.987608    0.626446    0.037726    11.00000   -1.50000
H13B  2    0.913289    0.668362   -0.057959    11.00000   -1.50000
H13C  2    0.939428    0.578557   -0.063537    11.00000   -1.50000
AFIX   0
C16   1    0.509209    0.750000    0.511574    10.50000    0.06098    0.22636 =
         0.16443    0.00000    0.04843    0.00000
AFIX   3
H16A  2    0.493689    0.797410    0.471423    11.00000   -1.50000
H16C  2    0.465099    0.750000    0.559823    10.50000   -1.50000
AFIX   0
C14   1    0.731013    0.626213   -0.050756    11.00000    0.18139    0.13665 =
         0.09621   -0.01790   -0.05504   -0.02819
AFIX  33
H14A  2    0.671862    0.613788   -0.022070    11.00000   -1.50000
H14B  2    0.722584    0.599901   -0.116073    11.00000   -1.50000
H14C  2    0.733774    0.682088   -0.060814    11.00000   -1.50000
AFIX   0
C17   1    0.650936    0.677980    0.633007    11.00000    0.20461    0.13864 =
         0.18636    0.08921    0.14304    0.04379
AFIX  33
H17A  2    0.726755    0.672691    0.656631    11.00000   -1.50000
H17B  2    0.622491    0.633296    0.591159    11.00000   -1.50000
H17C  2    0.620199    0.680726    0.691589    11.00000   -1.50000
AFIX   0
PART   1
C19   1    0.978431    0.750000    0.748185    10.28835    0.15214    0.26535 =
         0.03209    0.00000    0.03748    0.00000
AFIX   3
H19A  2    0.905980    0.750000    0.708094    10.28835   -1.50000
H19B  2    0.991159    0.703830    0.791065    10.57670   -1.50000
AFIX   0
C20   1    1.117708    0.676122    0.690975    10.57670    0.17081    0.14489 =
         0.05765   -0.00183   -0.02499    0.08090
AFIX  33
H20A  2    1.072949    0.633784    0.657992    10.57670   -1.50000
H20B  2    1.142881    0.665107    0.763565    10.57670   -1.50000
H20C  2    1.177252    0.681290    0.660483    10.57670   -1.50000
AFIX   0
PART   2
C19B  1    1.174025    0.750000    0.657500    10.21165    0.04981    0.24339 =
         0.08348    0.00000   -0.02696    0.00000
AFIX   3
H19D  2    1.170088    0.750000    0.586271    10.21165   -1.50000
H19E  2    1.210933    0.703835    0.690377    10.42330   -1.50000
AFIX   0
C20B  1    1.044941    0.678629    0.728409    10.42330    0.23674    0.15034 =
         0.06226    0.05179   -0.05381   -0.05220
AFIX  33
H20D  2    1.035412    0.690102    0.796154    10.42330   -1.50000
H20E  2    1.107561    0.646983    0.734599    10.42330   -1.50000
H20F  2    0.984060    0.650468    0.689292    10.42330   -1.50000
AFIX   0
PART   0
C3    1    1.249474    0.594070    0.427184    11.00000    0.04825    0.12080 =
         0.12321   -0.00007    0.02189    0.01405
AFIX  33
H3A   2    1.250299    0.613026    0.495292    11.00000   -1.50000
H3B   2    1.253545    0.637868    0.382727    11.00000   -1.50000
H3C   2    1.309274    0.559899    0.430773    11.00000   -1.50000
AFIX   0
C4    1    1.145993    0.511660    0.279366    11.00000    0.09096    0.10950 =
         0.08330   -0.00490    0.03753    0.04574
AFIX  33
H4A   2    1.161408    0.551572    0.234093    11.00000   -1.50000
H4B   2    1.077516    0.489058    0.249283    11.00000   -1.50000
H4C   2    1.199401    0.471313    0.288975    11.00000   -1.50000
AFIX   0
C5    1    1.132973    0.486187    0.462248    11.00000    0.10244    0.07846 =
         0.10654    0.03690    0.05001    0.03597
AFIX  33
H5A   2    1.130961    0.511503    0.526200    11.00000   -1.50000
H5B   2    1.192080    0.450424    0.473923    11.00000   -1.50000
H5C   2    1.068014    0.457588    0.436356    11.00000   -1.50000
AFIX   0
DFIX  1.54 0.02  C61 C67
DFIX  1.39 0.02 C61 C62 C62 C63 C63 C64 C64 C65
DFIX  1.39 0.02 C65 C66 C66 C61
DFIX  2.407 0.03 C62 C63  C62 C64  C63 C65
DFIX  2.407 0.03 C64 C66  C65 C61  C66 C66
DFIX  2.53 0.02 C67 C66  C67 C62
PART  1
C64   1    0.190359    0.750000    0.145875    10.25000    0.22541    0.10463 =
         0.23204    0.00000    0.04764    0.00000
AFIX  43
H64A  2    0.127795    0.750000    0.168269    10.25000   -1.20000
AFIX   0
C66   1    0.374050    0.750000    0.168699    10.25000    0.13957    0.06564 =
         0.09938    0.00000   -0.06538    0.00000
AFIX  43
H66A  2    0.441394    0.750000    0.213675    10.25000   -1.20000
AFIX   0
C61   1    0.372934    0.750000    0.068708    10.25000    0.30354    0.05982 =
         0.26089    0.00000    0.07638    0.00000
C67   1    0.477560   10.750000    0.031927    10.25000    0.22891    0.09363 =
         0.54132    0.00000    0.01610    0.00000
AFIX   3
H67A  2    0.553540    0.750000    0.057427    10.25000   -1.20000
H67B  2    0.455931    0.703830   -0.009493    10.50000   -1.20000
AFIX   0
C62   1    0.277972    0.750000   -0.002263    10.25000    0.19045    0.30225 =
         0.14781    0.00000   -0.11449    0.00000
AFIX  43
H62A  2    0.271529    0.750000   -0.073367    10.25000   -1.20000
AFIX   0
C63   1    0.189153    0.750000    0.042889    10.25000    0.14388    0.28729 =
         0.20504    0.00000   -0.09457    0.00000
AFIX  43
H63A  2    0.122372    0.750000   -0.003090    10.25000   -1.20000
AFIX   0
C65   1    0.290496    0.750000    0.215988    10.25000    0.34492    0.04812 =
         0.15504    0.00000    0.00424    0.00000
AFIX  43
H65A  2    0.299735    0.750000    0.287477    10.25000   -1.20000
PART   0
AFIX   0
HKLF 4 1  -1.0000 0.0000 0.0000   0.0000 1.0000 0.0000   0.0000 0.0000-1.0000

REM  ti7109 in P2(1)/m
REM R1 =  0.0761 for    4840 Fo > 4sig(Fo)  and  0.0876 for all    6013 data
REM    352 parameters refined using    136 restraints

END

WGHT      0.1570      1.3072

REM Highest difference peak  1.323,  deepest hole -0.438,  1-sigma level  0.106
Q1    1   0.3024  0.7500  0.0738  10.50000  0.05    0.91
Q2    1   0.1954  0.7500  0.2249  10.50000  0.05    0.89
Q3    1   0.3636  0.7500 -0.0239  10.50000  0.05    0.71
Q4    1   0.4276  0.7500  0.1238  10.50000  0.05    0.70
Q5    1   1.0737  0.6648  0.3029  11.00000  0.05    0.69
Q6    1   0.7228  0.7500  0.5233  10.50000  0.05    0.69
Q7    1   0.3393  0.7500  0.1315  10.50000  0.05    0.67
Q8    1   0.7250  0.5835  0.3759  11.00000  0.05    0.61
Q9    1   0.6132  0.6642  0.1859  11.00000  0.05    0.58
Q10   1   0.9519  0.5841  0.4371  11.00000  0.05    0.58
;
_shelx_res_checksum              31849

_shelx_hkl_file                  
;
   2   0   0 9618.45 119.653   3
   2   0   0 10423.6 133.853   0
   3   0   0 49274.6 171.182   1
   3   0   0 48199.9 289.619   3
   3   0   0 50179.6 328.682   0
   4   0   0 12871.7 227.596   0
   4   0   0 12786.9 125.689   1
   4   0   0 12167.3 202.875   3
   5   0   0 782.638 187.505   0
   5   0   0 234.122 115.140   3
   5   0   0 294.547 57.9272   1
   6   0   0 66071.0 514.898   0
   6   0   0 64607.9 456.180   3
   6   0   0 63762.1 248.782   1
   7   0   0 56275.5 256.946   1
   7   0   0 60832.8 590.379   0
   7   0   0 54602.1 473.866   3
   8   0   0 6206.00 316.899   0
   8   0   0 2368.50 114.036   1
   9   0   0 238799. 1062.72   0
  10   0   0 135093. 992.890   0
  11   0   0 978.763 225.030   0
  12   0   0 27.1280 87.1713   0
  13   0   0 306.379 120.649   0
  14   0   0 989.940 235.538   0
  15   0   0 909.628 299.238   0
  16   0   0 2223.73 394.547   0
  17   0   0 1809.15 375.607   0
   1   1   0 6.73602 10.4926   0
   2   1   0 29757.1 208.780   0
   2  -1   0 29384.5 204.351   0
   2  -1   0 28069.3 191.569   3
   3  -1   0 366.554 48.3475   0
   3  -1   0 76.4533 85.2004   3
   3   1   0 535.921 54.3659   0
   3   1   0 194.798 50.3372   1
   4  -1   0 3407.97 138.256   3
   4   1   0 3341.42 172.140   0
   4   1   0 3397.30 129.655   1
   4  -1   0 2070.09 49.5969   1
   4  -1   0 3111.81 167.324   0
   5  -1   0 26002.8 128.619   1
   5  -1   0 28845.5 319.321   3
   5   1   0 27922.1 200.567   1
   5   1   0 29710.2 357.085   0
   5  -1   0 29523.1 335.292   0
   6   1   0 1822.20 179.204   0
   6  -1   0 965.888 54.5355   1
   6  -1   0 3231.79 254.168   0
   6   1   0 2044.75 104.540   1
   6  -1   0 2963.18 179.748   3
   7  -1   0 19769.4 140.714   1
   7   1   0 20230.1 207.377   1
   7  -1   0 21477.1 367.645   0
   7  -1   0 22446.1 362.038   3
   7   1   0 20846.1 384.952   0
   8   1   0 131616. 453.245   1
   8  -1   0 124481. 313.867   1
   8  -1   0 138465. 792.540   0
   8  -1   0 134656. 755.632   3
   8   1   0 137395. 796.318   0
   9   1   0 55735.0 624.649   0
   9  -1   0 37546.8 485.206   3
   9  -1   0 62383.5 636.249   0
  10  -1   0 24897.8 615.836   0
  10   1   0 18590.0 538.899   0
  11   1   0 4551.15 349.045   0
  11  -1   0 4556.55 333.643   0
  12   1   0 17.2741 91.8881   0
  12  -1   0 113.211 146.696   0
  13  -1   0 151.972 129.868   0
  13   1   0 39.7628 103.169   0
  14   1   0 1411.29 309.494   0
  14  -1   0 1178.02 287.728   0
  15   1   0 1899.28 365.244   0
  15  -1   0 1722.58 379.531   0
  16   1   0 111.276 204.597   0
  16  -1   0 90.5765 180.846   0
  17  -1   0 2634.78 308.579   0
  17   1   0 2970.74 484.790   0
  -1  -2   0 67680.6 189.315   2
   1  -2   0 102812. 284.845   2
   1  -2   0 107131. 209.345   0
   1   2   0 72979.0 705.081   0
   1  -2   0 99497.3 272.060   3
   2  -2   0 21775.7 179.183   3
   2   2   0 23793.5 190.375   0
   2  -2   0 23107.5 175.642   0
  -2  -2   0 20818.0 135.873   2
   3  -2   0 186709. 505.614   0
   3   2   0 195348. 561.737   0
  -3  -2   0 176495. 420.188   2
   3  -2   0 182287. 536.515   3
   4  -2   0 12906.1 209.377   3
   4   2   0 13493.7 225.358   0
   4  -2   0 12493.2 218.406   0
  -4  -2   0 12905.2 186.726   2
   4  -2   0 13138.6 101.392   1
   5  -2   0 35.2287 23.9259   1
   5  -2   0 433.341 100.311   0
   5  -2   0 41.4207 63.7290   3
   5   2   0 189.818 62.1451   0
   5   2   0 437.368 109.566   1
   6  -2   0 724.445 45.1300   1
   6   2   0 833.410 98.3967   1
   6  -2   0 552.335 87.4252   0
   6   2   0 569.844 101.375   0
   6  -2   0 881.470 144.155   3
   7  -2   0 233.736 35.7736   1
   7   2   0 209.000 89.2113   0
   7   2   0 201.041 74.4043   1
   7  -2   0 733.362 140.558   0
   7  -2   0 433.538 157.882   3
   8   2   0 2754.59 158.010   1
   8  -2   0 9029.46 407.490   0
   8  -2   0 8183.97 383.962   3
   8   2   0 4132.25 345.755   0
   9   2   0 51653.5 688.488   0
   9  -2   0 48042.6 592.174   3
   9   2   0 39196.6 327.600   1
   9  -2   0 55363.0 640.297   0
  10  -2   0 11918.8 464.912   3
  10  -2   0 10438.0 417.746   0
  10   2   0 10314.4 491.280   0
  11  -2   0 211.892 211.591   0
  11  -2   0 145.514 123.400   3
  11   2   0 110.524 185.653   0
  12   2   0 54.2270 148.367   0
 -12  -2   0 43.1765 106.273   2
  12  -2   0 65.5807 108.936   0
 -13  -2   0 21.6891 79.9986   2
  13  -2   0 150.378 147.334   0
  13   2   0-6.11132 112.389   0
  14  -2   0 30.0019 99.9519   0
  14   2   0 174.171 177.741   0
  15  -2   0 311.772 203.571   0
  15   2   0 136.013 154.766   0
  16  -2   0 301.433 198.791   0
  16   2   0 202.224 206.155   0
  17  -2   0 357.363 311.697   0
  17   2   0 89.2453 159.517   0
   0  -3   0 33.2337 30.1411   3
   0  -3   0 8.45779 29.9586   2
  -1  -3   0 1698.31 81.2709   2
   1   3   0 1877.56 53.7440   0
   1  -3   0 1730.88 85.2331   3
   1  -3   0 1732.48 100.591   2
   2  -3   0 961.603 126.279   3
  -2  -3   0 803.722 78.5336   2
   2  -3   0 869.740 65.8720   0
   2   3   0 893.098 84.9670   0
  -3  -3   0 116.788 42.5679   2
   3  -3   0 247.304 68.7291   0
   3   3   0 205.412 61.9766   0
   3  -3   0 237.543 101.277   3
   4  -3   0 32272.2 311.505   3
   4  -3   0 32021.5 277.429   0
   4   3   0 33972.7 322.651   0
  -4  -3   0 30801.8 239.609   2
   5  -3   0 53916.2 427.108   0
   5  -3   0 51244.3 416.286   3
   5   3   0 55002.7 441.342   0
  -5  -3   0 51013.7 323.600   2
   6  -3   0 113.368 55.1054   3
   6  -3   0 109.064 60.4303   0
   6   3   0 123.726 68.9709   0
   6   3   0 310.419 99.9759   1
  -6  -3   0 116.689 60.7334   2
  -7  -3   0 73.7249 80.6802   2
   7  -3   0 54.9155 88.6172   3
   7  -3   0 28.2746 65.7868   0
   7   3   0 6.41243 48.6683   0
   7   3   0 101.797 62.4239   1
   8   3   0 5837.40 292.157   0
   8  -3   0 7256.01 315.714   0
   8   3   0 5576.43 179.216   1
  -8  -3   0 6762.13 242.501   2
   8  -3   0 6073.19 258.134   3
   9   3   0 1513.59 121.557   1
   9  -3   0 4088.94 396.850   3
  -9  -3   0 3576.11 280.515   2
   9   3   0 2456.27 259.550   0
   9  -3   0 4328.36 305.363   0
  10  -3   0 588.552 230.184   0
 -10  -3   0 779.974 210.113   2
  10   3   0 402.417 183.193   0
  10  -3   0 528.637 239.073   3
 -11  -3   0 267.127 106.138   2
  11  -3   0 225.577 217.619   3
  11  -3   0 155.878 139.025   0
  11   3   0 326.761 169.425   0
  12   3   0 1788.60 326.087   0
  12  -3   0 1174.55 256.732   0
  12  -3   0 827.668 223.304   3
 -12  -3   0 1257.70 195.553   2
 -13  -3   0 110.510 105.785   2
  13   3   0 151.037 172.297   0
  13  -3   0 74.8690 145.718   0
  14   3   0 2900.36 371.481   0
  14  -3   0 2266.12 320.535   0
  15   3   0 1163.07 328.571   0
  15  -3   0 1035.99 253.055   0
  16  -3   0 166.633 185.389   0
  16   3   0 95.6791 120.791   0
  17   3   0 167.306 197.173   0
  17  -3   0 322.586 247.675   0
   0  -4   0 113248. 397.284   3
   0  -4   0 110250. 374.042   2
   1   4   0 38978.0 161.828   0
   1  -4   0 38430.4 305.297   2
   1  -4   0 35861.0 266.910   3
  -1  -4   0 36596.3 264.588   3
  -1  -4   0 37682.2 252.907   2
   2   4   0 20838.9 181.137   0
  -2  -4   0 20245.0 174.658   2
   2  -4   0 21303.6 265.708   2
   2  -4   0 20568.1 175.933   0
   2  -4   0 20818.1 229.841   3
   3  -4   0 2711.72 137.021   3
   3   4   0 2612.65 107.680   0
  -3  -4   0 2657.16 93.8367   2
   3  -4   0 2695.10 107.094   0
   4   4   0 70983.4 409.991   0
   4  -4   0 69246.4 393.113   0
  -4  -4   0 67602.6 340.057   2
   4  -4   0 64023.6 411.606   3
   5  -4   0 10563.8 267.850   0
   5  -4   0 14977.6 301.298   3
   5   4   0 11132.9 245.278   0
  -5  -4   0 11559.4 202.262   2
   6   4   0 8891.81 234.999   1
  -6  -4   0 7643.10 193.848   2
   6  -4   0 7406.50 214.862   0
   6  -4   0 8009.13 240.897   3
   6   4   0 7396.30 212.746   0
  -7  -4   0 167.689 94.1860   2
   7  -4   0 93.0887 66.4768   3
   7   4   0 145.484 101.896   1
   7   4   0 27.0823 61.6454   0
   7  -4   0 31.8457 69.4101   0
   8   4   0 206.376 109.942   1
   8   4   0 291.342 171.333   0
   8  -4   0 235.216 110.929   3
  -8  -4   0 233.124 105.359   2
   8  -4   0 146.499 92.2800   0
  -9  -4   0 669.185 193.250   2
   9  -4   0 716.911 228.053   0
   9   4   0 316.855 76.4532   1
   9   4   0 1027.95 300.249   0
   9  -4   0 460.208 118.103   3
  10  -4   0 3707.67 290.333   3
 -10  -4   0 3570.07 254.705   2
  10   4   0 4644.04 351.773   0
  10  -4   0 4065.66 323.776   0
  11  -4   0 111.380 137.859   3
  11   4   0 224.704 170.438   0
  11  -4   0 354.059 176.439   0
 -11  -4   0 108.531 118.233   2
  12   4   0 5238.13 464.530   0
 -12  -4   0 3125.87 265.183   2
  12  -4   0 3203.43 328.732   3
  12  -4   0 3900.44 352.782   0
  13  -4   0 7735.26 460.090   0
  13  -4   0 7473.55 462.805   3
  13   4   0 8759.36 497.220   0
  14   4   0 633.673 239.005   0
  14  -4   0 705.844 298.998   0
  15  -4   0 998.168 315.686   0
  15   4   0 1745.92 409.535   0
  16   4   0 55.7342 166.174   0
  16  -4   0 72.7993 105.646   0
  17   4   0-20.8465 185.767   0
  17  -4   0 58.7263 144.337   0
   0  -5   0-7.72051 33.4308   3
   0  -5   0 43.8740 54.5035   2
  -1  -5   0 75257.6 378.537   3
  -1  -5   0 77022.0 360.661   2
   1   5   0 79155.0 215.010   0
   1  -5   0 73492.9 376.537   3
   1  -5   0 77432.0 395.072   2
   2  -5   0 5874.81 228.288   2
   2   5   0 5032.12 103.241   0
  -2  -5   0 5256.38 153.133   2
   2  -5   0 5575.39 180.192   3
   2  -5   0 5550.92 124.527   0
   3  -5   0 8366.76 150.916   0
   3   5   0 8777.93 161.062   0
   3  -5   0 8678.01 213.920   3
  -3  -5   0 8382.47 145.755   2
  -4  -5   0 312716. 701.639   2
   4  -5   0 315194. 883.585   3
   4   5   0 350718. 815.961   0
   4  -5   0 328957. 748.634   0
   5  -5   0 481735. 1023.34   0
   5   5   0 482379. 4012.23   0
   5  -5   0 476168. 1146.16   3
  -5  -5   0 455547. 898.999   2
   6  -5   0 8265.73 277.348   3
   6   5   0 7985.83 244.329   0
  -6  -5   0 7500.07 179.156   2
   6  -5   0 7646.36 234.549   0
   7  -5   0 140.626 83.8320   0
   7  -5   0 87.5405 112.500   3
   7   5   0 202.370 105.604   1
  -7  -5   0 222.169 107.935   2
   7   5   0 192.741 91.9353   0
  -8  -5   0 1624.95 141.876   2
   8   5   0 1865.53 203.802   1
   8  -5   0 1385.29 150.813   0
   8   5   0 1965.83 247.865   0
   8  -5   0 1887.37 224.223   3
   9   5   0 3445.01 308.539   0
   9   5   0 3066.48 230.961   1
  -9  -5   0 2866.20 237.851   2
   9  -5   0 3273.54 273.099   0
   9  -5   0 3499.01 296.643   3
 -10  -5   0 1091.90 136.755   2
  10   5   0 996.639 140.694   1
  10  -5   0 1282.30 218.171   3
  10   5   0 1427.72 266.391   0
  10  -5   0 1213.70 234.776   0
  11   5   0 5069.62 321.288   0
 -11  -5   0 4483.84 284.841   2
  11  -5   0 4914.84 393.691   0
  11  -5   0 4130.91 302.064   3
  12   5   0 13325.5 512.857   0
  12  -5   0 12008.6 494.608   3
  12  -5   0 12010.7 488.936   0
  13   5   0 2679.72 334.324   0
  13  -5   0 2108.01 331.017   0
  13  -5   0 2856.14 326.010   3
  14  -5   0 17813.6 588.995   0
  14  -5   0 15314.7 544.907   3
  14   5   0 21750.6 739.256   0
  15   5   0 3703.14 366.528   0
  15  -5   0 3010.93 391.784   0
  16  -5   0-16.2719 155.529   0
  16   5   0-12.1584 93.1492   0
  17  -5   0 50.0263 110.759   0
  17   5   0 16.2574 145.579   0
   0  -6   0 28929.8 286.513   3
   0  -6   0 31507.4 311.544   2
  -1  -6   0 3981.34 162.842   3
   1  -6   0 4546.85 194.679   2
   1   6   0 3999.00 63.8770   0
   1  -6   0 4701.08 216.324   3
  -1  -6   0 4054.24 144.512   2
  -2  -6   0 2838.80 146.354   2
   2  -6   0 3015.88 201.363   3
   2   6   0 3314.48 116.343   0
   2  -6   0 2988.51 100.810   0
   2  -6   0 3034.16 187.031   2
  -2  -6   0 3144.32 180.849   3
   3  -6   0 452797. 1034.72   2
   3  -6   0 463270. 2832.46   0
   3   6   0 465690. 3090.31   0
  -3  -6   0 449383. 3180.20   2
   3  -6   0 423311. 994.979   3
   4  -6   0 363688. 999.139   3
   4  -6   0 403130. 816.854   0
  -4  -6   0 371425. 815.843   2
   4   6   0 412772. 3352.43   0
   5  -6   0 9626.29 293.648   3
   5  -6   0 9110.46 237.493   0
  -5  -6   0 12985.5 248.285   2
   5   6   0 10884.1 297.452   0
   6   6   0 62467.1 532.409   0
   6  -6   0 57888.9 482.784   0
   6  -6   0 56154.9 507.341   3
  -6  -6   0 52532.2 388.564   2
   7  -6   0 8811.34 244.769   0
  -7  -6   0 8913.26 239.119   2
   7  -6   0 8520.16 301.175   3
   7   6   0 9176.93 300.970   0
   8   6   0 212.033 175.021   1
   8  -6   0 44.2722 75.3684   3
   8  -6   0 128.915 98.2815   0
  -8  -6   0 281.414 134.972   2
   8   6   0 139.420 139.980   0
   9   6   0 215.806 131.684   1
  -9  -6   0 131.843 87.8068   2
   9  -6   0 133.241 180.049   0
   9  -6   0 122.928 165.741   3
   9   6   0 66.6960 107.954   0
  10  -6   0 936.614 189.124   3
 -10  -6   0 698.951 121.821   2
  10   6   0 1553.78 300.479   0
  10   6   0 762.240 145.425   1
  10  -6   0 1219.66 241.236   0
  11  -6   0 1218.72 269.934   0
 -11  -6   0 588.529 137.206   2
  11   6   0 1296.20 247.347   0
  11  -6   0 970.598 233.848   3
  12   6   0 11725.0 525.629   0
  12  -6   0 11073.8 490.332   3
  12  -6   0 10887.4 465.403   0
  13  -6   0 34969.6 776.366   3
  13   6   0 35167.6 838.884   0
  13  -6   0 33312.2 772.400   0
  14   6   0 2604.19 367.569   0
  14  -6   0 2145.32 367.484   0
  14  -6   0 2091.92 311.831   3
  15   6   0 973.829 324.352   0
  15  -6   0 914.053 345.827   3
  15  -6   0 909.960 312.475   0
  16  -6   0 208.118 181.034   0
  16   6   0 137.104 172.271   0
  17  -6   0 68.9574 208.563   0
  17   6   0 133.729 219.294   0
   0  -7   0 200.101 134.272   2
   0  -7   0 266.741 141.126   3
  -1  -7   0 3355.43 135.795   2
   1   7   0 3376.97 55.0923   0
   1  -7   0 4038.49 201.545   2
  -1  -7   0 3478.07 160.957   3
   1  -7   0 3682.78 171.087   3
  -2  -7   0 5725.04 212.238   3
   2  -7   0 6801.43 238.971   2
   2   7   0 5990.32 128.382   0
  -2  -7   0 4815.34 136.271   2
   2  -7   0 5910.51 107.947   0
   2  -7   0 7619.47 288.095   3
   3  -7   0 13390.8 317.494   2
  -3  -7   0 2838.65 198.810   2
   3  -7   0 1376.74 107.704   3
   3  -7   0 10312.7 190.982   0
   3   7   0 2881.43 159.248   0
  -4  -7   0 190858. 639.742   2
   4  -7   0 181794. 771.283   3
   4   7   0 197623. 651.630   0
   4  -7   0 196360. 605.260   0
  -5  -7   0 96084.7 500.401   2
   5  -7   0 97046.8 643.075   3
   5   7   0 106138. 573.748   0
   5  -7   0 107726. 547.391   0
   6  -7   0 6702.16 233.456   0
   6  -7   0 7290.80 304.718   3
   6   7   0 7206.15 279.332   0
  -6  -7   0 7002.97 221.003   2
  -7  -7   0 280.521 125.818   2
   7  -7   0 186.731 79.6697   3
   7  -7   0 135.926 83.2867   0
   7   7   0 192.331 95.7663   0
   8  -7   0 1974.12 210.897   3
   8   7   0 2394.80 260.813   1
  -8  -7   0 1951.16 190.968   2
   8  -7   0 1354.04 136.732   0
   8   7   0 1679.09 176.936   0
  -9  -7   0 300.775 131.213   2
   9   7   0 671.417 202.755   1
   9  -7   0 299.071 182.931   3
   9   7   0 283.173 130.696   0
   9  -7   0 550.687 218.580   0
  10  -7   0 118.988 85.1648   0
  10   7   0 115.974 103.869   1
  10  -7   0 52.3103 92.9796   3
 -10  -7   0 67.9823 71.3678   2
  10   7   0 294.205 158.473   0
  11  -7   0 7615.73 474.639   3
  11   7   0 8193.96 487.505   0
  11  -7   0 8439.12 473.864   0
  12  -7   0 3581.38 369.936   3
  12   7   0 5309.73 436.438   0
  12  -7   0 4345.08 322.674   0
  13   7   0 1601.56 324.056   0
  13  -7   0 1317.36 289.996   0
  13  -7   0 1874.12 354.976   3
  14  -7   0 9432.51 533.680   3
  14   7   0 8311.85 489.056   0
  14  -7   0 8540.86 514.573   0
  15   7   0 57.8043 165.797   0
  15  -7   0 486.026 317.879   3
  15  -7   0 281.053 197.790   0
  16   7   0-13.6073 101.711   0
  16  -7   0 16.7853 98.3017   0
  16  -7   0 51.6998 133.687   3
  17  -7   0 147.234 217.162   0
   0  -8   0 111333. 582.828   3
   0  -8   0 113576. 589.055   2
   1  -8   0 15830.0 324.329   2
   1  -8   0 13501.8 244.895   3
  -1  -8   0 14316.0 250.827   3
  -1  -8   0 14432.5 250.796   2
   2  -8   0 268.020 188.589   2
  -2  -8   0 53.7979 50.8158   2
  -2  -8   0 258.848 103.025   3
   2   8   0 90.8864 50.3648   0
   2  -8   0 395.290 153.274   3
   2  -8   0 47.2951 19.6285   0
   3  -8   0 54501.6 286.535   0
   3  -8   0 48533.6 426.263   3
   3   8   0 51064.1 320.733   0
   3  -8   0 61934.4 576.896   2
  -3  -8   0 48621.2 372.658   2
  -3  -8   0 53363.3 465.503   3
   4  -8   0 36959.8 473.088   3
  -4  -8   0 35522.9 349.617   2
   4   8   0 37702.5 349.978   0
   4  -8   0 39810.2 327.401   0
   5  -8   0 3102.19 163.313   0
  -5  -8   0 3828.28 172.609   2
   5   8   0 3212.55 201.341   0
   5  -8   0 3620.74 270.143   3
   6  -8   0 12405.9 336.780   3
   6   8   0 13239.0 344.078   0
  -6  -8   0 12249.7 257.699   2
   6  -8   0 12889.4 290.568   0
  -7  -8   0 67.4775 61.4774   2
   7  -8   0-11.7532 54.7699   3
   7   8   0 102.648 99.3066   0
   7  -8   0 94.8291 108.826   0
   8  -8   0 285.566 139.162   0
   8  -8   0 299.871 160.228   3
  -8  -8   0 229.499 103.380   2
   8   8   0 651.760 191.063   0
   8   8   0 933.296 215.249   1
  -9  -8   0 2672.32 212.015   2
   9  -8   0 2537.48 227.698   0
   9   8   0 2915.22 323.541   0
   9   8   0 3518.06 282.872   1
   9  -8   0 2463.63 256.201   3
  10   8   0 461.612 230.272   0
  10   8   0 309.774 147.933   1
  10  -8   0-8.29991 88.7121   3
 -10  -8   0 48.3062 61.6928   2
  10  -8   0 284.565 160.774   0
  11  -8   0 121.961 131.811   3
  11   8   0 617.043 278.984   0
  11  -8   0 516.528 189.694   0
  12   8   0 4146.55 387.265   0
  12  -8   0 4223.64 379.077   0
  12  -8   0 3521.31 344.304   3
  13  -8   0 6710.23 438.468   0
  13   8   0 6749.83 432.346   0
  13  -8   0 5634.29 398.876   3
  14  -8   0 26.1164 156.021   0
  14  -8   0 355.605 268.298   3
  14   8   0 63.4424 123.550   0
  15  -8   0 391.532 255.081   0
  15   8   0 58.5190 179.933   0
  15  -8   0 194.300 140.890   3
  16  -8   0 55.4959 148.958   3
  16   8   0 132.933 198.153   0
  16  -8   0 230.035 176.205   0
  17  -8   0 75.8945 129.912   0
   0  -9   0 34.1225 74.0545   2
   0  -9   0 850.265 160.554   3
   1  -9   0 18147.8 307.484   3
   1  -9   0 19708.7 365.588   2
  -1  -9   0 18569.0 320.438   3
  -1  -9   0 18786.4 313.797   2
   2  -9   0 1190.41 219.290   2
   2  -9   0 934.008 43.3604   0
   2   9   0 877.604 58.6034   0
   2  -9   0 941.504 155.895   3
  -2  -9   0 906.154 126.366   2
  -2  -9   0 1173.17 166.029   3
   3  -9   0 217.302 59.2160   0
  -3  -9   0 140.399 59.1460   2
   3  -9   0 989.455 221.305   2
   3   9   0 290.624 73.5022   0
   3  -9   0 101.860 65.3698   3
  -3  -9   0 95.2096 71.0572   3
   4  -9   0 4110.30 229.477   3
   4  -9   0 4489.81 157.459   0
  -4  -9   0 4198.00 190.066   2
   4   9   0 4491.10 189.355   0
  -5  -9   0 16745.2 299.490   2
   5   9   0 17232.7 299.046   0
   5  -9   0 16456.7 396.791   3
   5  -9   0 18407.4 284.880   0
   6  -9   0 242.698 103.663   3
   6   9   0 523.534 140.112   0
   6  -9   0 429.087 125.699   0
  -6  -9   0 219.302 70.2779   2
   7  -9   0 21.0223 68.5285   0
   7  -9   0 76.6724 97.2258   3
  -7  -9   0 56.9556 82.1876   2
   7   9   0 128.201 132.314   0
  -8  -9   0 2799.01 187.488   2
   8  -9   0 2881.49 227.313   0
   8   9   0 3353.54 262.957   0
   8  -9   0 2927.21 297.412   3
   9   9   0 2149.89 245.082   1
   9  -9   0 1052.50 196.440   0
   9  -9   0 1246.90 256.299   3
  -9  -9   0 1515.54 195.395   2
   9   9   0 1632.72 256.685   0
  10   9   0 533.201 181.616   1
  10  -9   0 63.9388 138.864   3
  10   9   0 296.406 184.015   0
  10  -9   0 166.766 140.203   0
  11  -9   0 228.018 135.358   0
  11   9   0 25.3127 105.822   0
  11  -9   0 4.81555 87.7255   3
  11   9   0 217.461 148.398   1
  12  -9   0 392.553 183.851   3
  12   9   0 87.9520 119.351   0
  12  -9   0 401.149 162.647   0
  13   9   0 411.716 180.935   0
  13  -9   0 367.522 152.211   3
  13  -9   0 460.089 223.055   0
  14  -9   0 283.183 192.359   3
  14   9   0 104.327 176.856   0
  14  -9   0 160.985 168.805   0
  15  -9   0 222.592 150.366   0
  15  -9   0 335.490 221.192   3
  15   9   0 165.636 153.647   0
  16   9   0 182.108 185.204   0
  16  -9   0 92.2373 118.942   0
  16  -9   0 115.658 223.056   3
  17  -9   0 27.9653 91.0310   0
   0 -10   0 137312. 694.040   2
   0 -10   0 143901. 702.375   3
  -1 -10   0 4331.36 265.548   2
  -1 -10   0 5261.45 264.133   3
   1 -10   0 2700.61 246.888   3
   1 -10   0 1927.15 228.124   2
   2 -10   0 224.935 92.8721   2
   2  10   0 265.668 47.5152   0
  -2 -10   0 152.918 80.8434   3
  -2 -10   0 135.690 88.5516   2
   2 -10   0 102.343 102.121   3
   3 -10   0 264.858 79.3450   3
  -3 -10   0 372.366 122.295   3
   3 -10   0 567.164 66.3076   0
  -3 -10   0 274.574 74.6800   2
   3  10   0 530.449 67.1337   0
   3 -10   0 353.164 108.665   2
  -4 -10   0 231.466 131.680   2
   4 -10   0 562.000 178.745   3
   4  10   0 178.929 83.8529   0
  -4 -10   0 33.4662 73.5160   3
   4 -10   0 310.893 80.5220   0
  -5 -10   0 381.427 143.158   2
   5 -10   0 419.915 112.634   0
   5  10   0 431.612 115.890   0
   5 -10   0 320.182 158.827   3
  -6 -10   0 567.626 141.356   2
   6  10   0 433.691 94.2392   0
   6 -10   0 422.805 99.7295   0
   6 -10   0 407.129 126.676   3
  -7 -10   0 1223.71 149.052   2
   7 -10   0 132.731 147.640   3
   7  10   0 1471.60 191.038   0
   7 -10   0 1435.79 169.480   0
   8 -10   0 458.078 171.782   3
  -8 -10   0 145.790 108.143   2
   8 -10   0 49.6286 67.4453   0
   8  10   0 85.6868 157.305   0
   9 -10   0 20281.7 503.552   3
   9  10   0 20241.8 476.887   0
   9 -10   0 20455.3 432.455   0
   9  10   0 27098.7 591.926   1
  10 -10   0 3745.72 285.933   0
  10  10   0 3963.10 356.289   0
  10 -10   0 3339.95 312.327   3
  10  10   0 4899.08 333.171   1
  11 -10   0 28.5531 109.277   3
  11  10   0 116.935 122.463   1
  11 -10   0 113.658 106.800   0
  11  10   0 303.558 197.351   0
  12 -10   0 73.5385 105.717   3
  12 -10   0 133.136 100.994   0
  12  10   0 11.9307 125.286   0
  13 -10   0 679.696 241.932   3
  13  10   0 259.846 160.646   0
  13 -10   0 254.281 157.683   0
  14 -10   0 110.147 162.142   3
  14 -10   0 24.2317 115.968   0
  14  10   0 31.0937 107.467   0
  15  10   0 136.637 199.221   0
  15 -10   0 91.0471 177.989   0
  15 -10   0 122.542 197.023   3
  16 -10   0 165.423 223.062   3
  16  10   0 95.9646 158.442   0
   0 -11   0 1525.72 321.983   3
   0 -11   0 2708.47 277.894   2
  -1 -11   0 53559.4 572.737   3
   1 -11   0 50004.8 606.734   2
  -1 -11   0 50626.1 564.959   2
   1 -11   0 48167.7 574.923   3
  -2 -11   0 8191.10 347.498   3
   2 -11   0 5782.50 261.451   2
  -2 -11   0 7311.43 296.758   2
   2 -11   0 5033.16 225.261   3
  -3 -11   0 191.796 78.3203   2
   3 -11   0 157.644 87.7576   2
   3  11   0 394.874 59.7629   0
  -3 -11   0 350.987 146.594   3
   3 -11   0 580.558 188.931   3
   4  11   0 1377.12 89.9808   0
   4 -11   0 1738.04 240.115   3
   4 -11   0 1496.23 222.160   2
  -4 -11   0 1162.58 173.471   3
  -4 -11   0 1707.77 190.925   2
   5 -11   0 356.495 139.274   3
   5 -11   0 426.032 84.5089   0
  -5 -11   0 393.584 144.303   3
  -5 -11   0 675.368 152.134   2
   5  11   0 523.312 108.199   0
   6  11   0 62.3789 104.650   0
   6 -11   0 21.3921 44.8914   0
  -6 -11   0 52.5244 60.5966   2
   6 -11   0 188.607 138.396   3
   7 -11   0 1670.90 182.037   0
   7 -11   0 2329.75 301.148   3
  -7 -11   0 1758.66 179.394   2
   7  11   0 1911.98 195.117   0
   8 -11   0 45336.5 660.344   3
   8 -11   0 43585.4 530.589   0
  -8 -11   0 43699.9 535.997   2
   8  11   0 46578.1 608.087   0
   9  11   0 10128.7 408.793   0
   9  11   0 13946.4 432.208   1
   9 -11   0 15602.7 538.816   3
   9 -11   0 10113.6 388.476   0
  10  11   0 4088.72 378.835   1
  10  11   0 2412.11 265.340   0
  10 -11   0 2213.72 239.605   0
  10 -11   0 2946.52 359.174   3
  11 -11   0 876.310 207.133   3
  11  11   0 1362.16 282.162   0
  11 -11   0 1431.40 226.695   0
  11  11   0 1513.55 276.860   1
  12  11   0 174.637 151.136   0
  12 -11   0 307.901 188.631   3
  13 -11   0 127.243 212.161   3
  13  11   0 129.114 149.059   0
  14 -11   0 18.8814 141.517   3
  14  11   0 22.1620 98.9663   0
  15 -11   0 174.910 216.073   3
  15  11   0 104.471 188.047   0
  16  11   0 160.943 193.986   0
   0 -12   0 250087. 1147.77   3
   0 -12   0 267241. 1150.22   2
   1 -12   0 48591.1 632.286   3
   1 -12   0 45779.0 570.197   2
  -1 -12   0 65634.2 664.292   2
  -1 -12   0 50614.9 596.224   3
  -2 -12   0 6965.07 350.002   3
   2 -12   0 2432.26 192.854   2
  -2 -12   0 4554.53 286.702   2
   2 -12   0 1536.01 216.553   3
  -3 -12   0 2959.76 174.074   2
  -3 -12   0 3758.69 297.187   3
   3 -12   0 2803.38 213.230   2
   3 -12   0 4264.23 285.664   3
   4 -12   0 150.221 136.064   3
  -4 -12   0 67.0090 91.4869   3
  -4 -12   0-19.8489 49.3269   2
   4 -12   0 26.5664 80.2684   2
  -5 -12   0 93.8293 151.649   3
  -5 -12   0 69.8604 79.5756   2
   5 -12   0 32.3104 68.8120   3
   5  12   0 32.5954 52.7951   0
  -6 -12   0 1940.62 300.559   3
  -6 -12   0 1653.81 196.206   2
   6 -12   0 1706.08 263.871   3
   6  12   0 1403.74 138.884   0
   7 -12   0 10493.6 421.857   3
  -7 -12   0 6312.18 295.222   2
   7  12   0 7167.84 317.521   0
   8  12   0 211.158 155.972   0
   8 -12   0 926.583 240.598   3
   9  12   0 32204.8 592.910   0
   9 -12   0 36092.2 706.322   3
   9  12   0 42177.4 732.518   1
  10  12   0 18823.2 559.184   1
  10 -12   0 16697.1 575.055   3
  10  12   0 15458.8 472.912   0
  11 -12   0 73.6022 139.991   3
  11  12   0 64.7692 116.585   0
  11  12   0 113.178 112.788   1
  12  12   0 65.6966 139.126   0
  12 -12   0 8.82932 93.0505   3
  13  12   0 16.2015 106.465   0
  13 -12   0 55.8723 168.436   3
  14 -12   0 211.827 204.330   3
  14  12   0 153.292 129.932   0
  15  12   0 79.9138 151.111   0
  15 -12   0 278.890 256.214   3
   0 -13   0 9000.88 388.461   2
   0 -13   0 1619.99 357.057   3
  -1 -13   0 72315.9 735.396   2
   1 -13   0 61694.3 760.610   2
  -1 -13   0 54608.8 696.172   3
   1 -13   0 52891.5 712.200   3
   2 -13   0 2102.80 243.823   2
   2 -13   0 1148.69 142.591   3
  -2 -13   0 5398.64 355.932   3
  -2 -13   0 4526.16 339.289   2
  -3 -13   0 322.206 167.792   2
  -3 -13   0 402.407 142.416   3
   3 -13   0 462.953 224.963   3
   3 -13   0 253.183 174.541   2
  -4 -13   0 95.4794 82.0702   2
  -4 -13   0 132.023 96.0269   3
   4 -13   0 56.4103 88.7553   3
   4 -13   0 131.624 149.711   2
  -5 -13   0 171.125 112.434   2
  -5 -13   0 511.365 188.554   3
   5 -13   0 66.0275 92.7444   3
  -6 -13   0 118.857 104.311   3
   6 -13   0 243.849 151.719   3
  -6 -13   0 18.6049 89.3352   2
  -7 -13   0 3987.69 201.304   2
   7 -13   0 6318.41 377.646   3
  -7 -13   0 6600.78 386.726   3
   8 -13   0 23673.1 592.565   3
   9 -13   0 10941.8 544.420   3
   9  13   0 12667.7 536.878   1
  10 -13   0 1779.05 336.719   3
  10  13   0 2599.94 367.144   1
  11  13   0 355.052 227.690   1
  11 -13   0 454.518 214.030   3
  12 -13   0 71.8540 148.027   3
  13 -13   0 35.5196 121.787   3
  14 -13   0 81.5911 159.139   3
   0 -14   0 97670.5 905.240   3
   0 -14   0 93744.5 876.582   2
   1 -14   0 6275.91 462.264   2
   1 -14   0 5326.13 388.605   3
  -1 -14   0 10971.4 418.706   2
  -1 -14   0 10234.5 515.009   3
  -2 -14   0 1235.05 254.235   3
   2 -14   0 572.364 231.043   2
  -2 -14   0 678.095 162.854   2
   2 -14   0 195.499 92.3064   3
  -3 -14   0 2578.49 306.998   3
   3 -14   0 2509.19 282.661   3
   3 -14   0 2209.38 259.706   2
  -3 -14   0 2340.85 235.265   2
  -4 -14   0 2120.50 278.595   3
   4 -14   0 2106.35 253.439   3
  -4 -14   0 1759.79 202.516   2
  -5 -14   0 148.277 97.6763   2
   5 -14   0 51.0049 94.6588   3
  -5 -14   0 292.298 168.026   3
   6 -14   0 119.931 145.428   3
  -6 -14   0 3.66159 67.5297   2
  -6 -14   0 90.5046 142.163   3
  -7 -14   0 222.091 119.340   3
   7 -14   0 411.240 187.528   3
  -8 -14   0 829.467 235.178   3
   8 -14   0 421.854 254.541   3
   9 -14   0 8584.10 458.386   3
   9  14   0 10508.6 517.996   1
  10 -14   0 3118.20 389.655   3
  10  14   0 3244.41 340.043   1
  11 -14   0 113.218 113.024   3
  11  14   0 119.662 143.628   1
  12 -14   0 80.8769 167.105   3
  13 -14   0 269.070 230.104   3
  14 -14   0 35.4567 117.430   3
   0 -15   0 20.0913 124.214   2
   0 -15   0 56.7869 167.318   3
  -1 -15   0 327.820 191.846   3
   1 -15   0 244.202 158.025   3
   1 -15   0 340.938 193.994   2
  -1 -15   0 844.359 212.140   2
   2 -15   0 108.431 96.1566   2
  -2 -15   0 50.1468 100.136   3
  -2 -15   0 313.609 200.515   2
   2 -15   0 49.6674 76.3226   3
  -3 -15   0 978.517 209.852   3
   3 -15   0 1235.01 268.053   3
   3 -15   0 864.733 232.412   2
  -3 -15   0 1182.82 264.537   2
  -4 -15   0 5482.10 362.954   3
   4 -15   0 5333.23 375.075   3
  -4 -15   0 5298.34 317.948   2
   5 -15   0 7447.38 412.774   3
  -5 -15   0 7206.28 344.641   2
  -5 -15   0 7932.73 460.819   3
  -6 -15   0 61.6663 90.6628   3
   6 -15   0 74.2835 102.133   3
  -6 -15   0 32.2528 87.6555   2
  -7 -15   0 54.2557 88.6838   3
   7 -15   0 108.900 114.388   3
  -8 -15   0 513.460 159.987   3
   8 -15   0 454.311 181.601   3
   9  15   0 141.175 142.039   1
  -9 -15   0 16.6279 101.022   3
   9 -15   0 113.628 101.041   3
  10  15   0 341.791 220.988   1
  10 -15   0 204.707 154.528   3
  11 -15   0 57.5216 114.967   3
  11  15   0 179.833 141.936   1
  12 -15   0 39.2123 111.781   3
  13 -15   0 157.008 166.494   3
   0 -16   0 106.788 106.472   2
   0 -16   0 62.5457 162.862   3
   1 -16   0 194.573 115.253   3
   1 -16   0 374.994 144.662   2
  -1 -16   0 539.913 189.694   2
  -1 -16   0 315.383 183.287   3
  -2 -16   0 350.455 196.625   2
   2 -16   0 76.9888 113.539   2
   2 -16   0 56.3143 154.402   3
  -2 -16   0 324.250 172.193   3
   3 -16   0 3942.25 404.747   3
   3 -16   0 3571.60 417.015   2
  -3 -16   0 3019.18 299.497   3
  -3 -16   0 3411.04 312.737   2
  -4 -16   0 4583.00 308.272   2
  -4 -16   0 5559.83 436.624   3
   4 -16   0 5815.12 399.242   3
  -5 -16   0 674.769 226.813   2
   5 -16   0 1047.98 294.945   3
  -5 -16   0 893.550 265.778   3
  -6 -16   0 950.163 181.427   3
   6 -16   0 871.216 177.075   3
   7 -16   0-1.40854 131.719   3
  -7 -16   0-16.0561 76.6917   3
  -8 -16   0 29.1335 100.815   3
   8 -16   0-7.91208 85.3244   3
   9  16   0 279.068 215.030   1
   9 -16   0 39.9800 124.768   3
  -9 -16   0 49.0467 111.792   3
  10  16   0 794.370 296.415   1
 -10 -16   0 117.262 177.170   3
  10 -16   0 38.3432 121.564   3
  11 -16   0 57.3156 122.758   3
 -11 -16   0 227.286 178.145   3
  11  16   0 361.092 235.204   1
  12 -16   0 142.063 207.711   3
 -12 -16   0 450.820 194.489   3
   0 -17   0 39.5053 90.3005   2
   0 -17   0 127.027 132.613   3
   1 -17   0 287.103 158.112   2
  -1 -17   0 534.678 183.485   2
  -1 -17   0 913.258 271.483   3
   1 -17   0 724.253 250.132   3
  -2 -17   0-2.21781 91.5100   2
  -2 -17   0 115.336 145.216   3
   2 -17   0 146.876 167.149   2
   2 -17   0 26.1979 132.946   3
   3 -17   0 102.151 134.155   3
  -3 -17   0 412.199 215.768   3
   3 -17   0 482.128 269.322   2
  -3 -17   0 82.9738 105.748   2
  -4 -17   0 12790.5 420.488   2
   4 -17   0 16186.6 595.501   3
  -4 -17   0 15234.7 555.482   3
   5 -17   0 21554.2 673.682   3
  -5 -17   0 23933.9 631.440   3
  -6 -17   0 448.148 256.540   3
   6 -17   0 41.5966 109.864   3
   7 -17   0-53.1343 103.583   3
  -7 -17   0 46.1930 133.514   3
   8 -17   0 94.0754 145.142   3
  -8 -17   0 79.9169 130.782   3
   9 -17   0 127.616 163.970   3
  -9 -17   0 327.024 197.392   3
   9  17   0 196.111 171.511   1
  10  17   0 911.016 317.696   1
  10 -17   0 139.016 204.163   3
 -10 -17   0 74.1606 139.638   3
  11  17   0 705.075 268.490   1
  11 -17   0 476.879 284.595   3
 -11 -17   0 303.093 192.094   3
  12 -17   0 133.512 170.353   3
 -12 -17   0 95.7740 169.933   3
 -13 -17   0 252.218 173.772   3
   0 -18   0 759.730 189.773   3
   0 -18   0 980.166 236.666   2
   1 -18   0 41.5367 120.548   2
  -1 -18   0 26.6212 123.165   2
   1 -18   0 42.6915 104.709   3
  -1 -18   0 49.0000 146.560   3
   2 -18   0 414.749 177.854   3
  -2 -18   0 370.398 225.202   3
  -2 -18   0 54.0028 124.173   2
   2 -18   0 259.853 188.657   2
  -3 -18   0 9237.55 467.935   2
  -3 -18   0 12483.6 464.388   3
   3 -18   0 10325.9 563.754   3
   3 -18   0 13187.2 507.837   2
  -4 -18   0 16673.8 544.254   3
  -4 -18   0 11683.1 472.940   2
   4 -18   0 13550.0 580.864   3
  -5 -18   0 1436.01 258.031   3
   5 -18   0 1432.33 325.493   3
   6 -18   0 2525.20 373.354   3
  -6 -18   0 2967.62 329.850   3
  -7 -18   0 55.7679 119.301   3
   7 -18   0 29.9597 126.480   3
   8 -18   0-2.04315 126.703   3
  -8 -18   0 40.6528 111.536   3
  -9 -18   0 75.7688 157.176   3
   9 -18   0 55.3725 131.444   3
   9  18   0 434.999 241.799   1
  10 -18   0 119.744 146.716   3
 -10 -18   0 178.526 205.285   3
  10  18   0 450.095 234.538   1
  11 -18   0 147.294 149.965   3
  11  18   0 298.595 204.090   1
 -11 -18   0 177.038 185.632   3
 -12 -18   0 777.259 209.518   3
   0 -19   0 94.3818 121.766   3
   0 -19   0 48.7181 105.719   2
  -1 -19   0 116.132 139.202   2
   1 -19   0 257.371 147.729   3
  -1 -19   0 120.756 127.265   3
   1 -19   0 499.027 215.279   2
  -2 -19   0 780.192 232.251   2
   2 -19   0 1131.23 305.519   2
   2 -19   0 387.337 197.833   3
  -2 -19   0 894.729 278.930   3
   3 -19   0 38.5935 144.031   3
  -3 -19   0 494.497 197.371   3
  -3 -19   0 163.687 135.467   2
  -4 -19   0 13553.4 555.695   3
   4 -19   0 10681.6 496.542   3
  -5 -19   0 10401.5 454.399   3
   5 -19   0 8593.85 462.232   3
  -6 -19   0 648.629 246.053   3
   6 -19   0 342.006 200.835   3
  -7 -19   0 105.370 154.086   3
   7 -19   0 161.580 224.483   3
   8 -19   0 57.8728 167.383   3
   8  19   0 116.145 190.623   1
  -8 -19   0 390.505 202.554   3
  -9 -19   0 54.3437 129.828   3
   9  19   0 517.065 285.073   1
   9 -19   0 77.6880 141.272   3
  10  19   0 324.043 264.615   1
 -10 -19   0 102.559 148.635   3
  10 -19   0 74.8785 159.100   3
 -11 -19   0 105.512 202.252   3
  11  19   0 321.849 275.997   1
   0 -20   0 5623.43 474.346   3
   0 -20   0 6362.35 422.445   2
  -1 -20   0 197.176 172.703   2
   1 -20   0 286.218 205.038   3
  -1 -20   0 334.769 221.999   3
   1 -20   0 930.883 336.778   2
  -2 -20   0 30.5524 89.6465   2
   2 -20   0 667.825 250.415   2
   2 -20   0-4.37238 88.3314   3
  -2 -20   0 49.5296 114.429   3
  -3 -20   0 4874.73 412.069   3
   3 -20   0 4321.57 365.294   3
   4 -20   0 1016.64 275.207   3
  -4 -20   0 1283.78 332.166   3
   5 -20   0 205.995 176.847   3
  -5 -20   0 200.164 217.570   3
  -6 -20   0 179.321 137.697   3
   6 -20   0 342.620 188.557   3
  -7 -20   0 159.709 162.869   3
   7 -20   0 68.0111 171.558   3
   8 -20   0 70.4651 141.791   3
   8  20   0 124.286 164.108   1
  -8 -20   0 27.7560 174.371   3
  -9 -20   0 745.349 276.072   3
   9 -20   0 712.856 240.728   3
   9  20   0 1579.89 400.044   1
 -10 -20   0 199.609 226.924   3
  10  20   0 887.044 404.075   1
   0 -21   0 150.583 201.472   3
   0 -21   0 129.485 186.027   2
  -1 -21   0 369.754 166.726   2
  -1 -21   0 350.009 175.869   3
   1 -21   0 287.113 151.332   3
   1 -21   0 1007.37 244.580   2
   2 -21   0 138.052 130.612   3
  -2 -21   0 162.672 185.221   2
  -2 -21   0 124.553 142.850   3
   3 -21   0 369.302 242.098   3
  -3 -21   0 130.021 146.107   3
   4 -21   0 487.273 296.666   3
  -4 -21   0 648.554 212.152   3
   5 -21   0 97.3118 140.939   3
  -5 -21   0 138.467 179.045   3
  -6 -21   0 151.980 146.068   3
   6 -21   0-11.5791 103.499   3
  -7 -21   0 50.3647 116.404   3
   7 -21   0 174.343 230.117   3
   7  21   0 769.002 311.800   1
   8  21   0 707.683 284.759   1
  -8 -21   0 175.394 173.798   3
   8 -21   0 19.8114 157.520   3
  -9 -21   0 158.865 187.763   3
   0 -22   0 3275.61 462.939   3
   0 -22   0 3513.34 387.464   2
  -1 -22   0 531.764 206.663   3
   1 -22   0 256.103 155.145   3
  -1 -22   0 666.868 278.157   2
   1 -22   0 284.975 171.757   2
   2 -22   0 160.099 181.595   3
  -2 -22   0 67.0923 132.803   3
  -3 -22   0 118.254 193.667   3
   3 -22   0 83.2073 160.121   3
   4 -22   0 210.466 179.707   3
  -4 -22   0 185.548 184.120   3
  -5 -22   0 157.734 164.838   3
   5 -22   0 93.3640 138.972   3
  -6 -22   0 199.836 173.476   3
   6 -22   0 244.365 195.572   3
  -7 -22   0 89.7839 148.247   3
  -8 -22   0 20.0719 105.410   3
   0 -23   0 217.909 181.110   3
   0 -23   0 97.1607 162.356   2
   1 -23   0 1800.03 347.174   3
  -1 -23   0 1444.56 350.601   3
  -2 -23   0 164.629 149.144   3
   2 -23   0 144.460 132.796   3
   3 -23   0 78.1540 152.123   3
  -3 -23   0 57.3221 120.606   3
   4 -23   0 157.749 218.546   3
  -4 -23   0 58.3520 152.801   3
  -5 -23   0 212.655 216.461   3
  -6 -23   0 71.4845 159.731   3
   0 -24   0 4329.45 436.604   3
   1 -24   0 896.657 300.984   3
  -1 -24   0 805.097 307.832   3
  -2 -24   0 245.801 234.719   3
  -3 -24   0 133.071 144.332   3
  17   0  -1 3305.57 536.163   0
  16   0  -1 519.443 279.849   0
  15   0  -1 2823.18 372.942   0
  14   0  -1 2154.66 299.400   0
  13   0  -1 2091.53 308.329   0
  12   0  -1 1658.76 302.614   0
  11   0  -1 22138.4 622.118   0
  10   0  -1 69265.6 822.201   0
   9   0  -1 13880.1 525.098   0
   8   0  -1 108409. 264.381   1
   8   0  -1 105120. 649.919   3
   8   0  -1 129769. 782.762   0
   7   0  -1 4504.11 275.331   3
   7   0  -1 3122.30 68.3618   1
   7   0  -1 3138.04 169.795   0
   6   0  -1 3773.41 204.895   3
   6   0  -1 3428.93 176.000   0
   6   0  -1 3507.26 73.9235   1
   5   0  -1 29440.4 320.646   0
   5   0  -1 26234.0 124.079   1
   5   0  -1 29742.1 304.911   3
   4   0  -1 465.318 111.480   3
   4   0  -1 1129.76 147.930   0
   3   0  -1 272131. 2187.87   0
   3   0  -1 256829. 1961.90   3
   2   0  -1 170514. 1245.45   3
   2   0  -1 170416. 375.822   0
   1   0   1 112233. 277.854   0
   2   0   1 15956.2 122.863   1
   2   0   1 10619.4 122.316   3
   2   0   1 17460.1 170.333   0
   3   0   1 50264.9 357.297   0
   3   0   1 44112.5 300.727   3
   3   0   1 44273.2 216.703   1
   4   0   1 18696.4 303.489   0
   4   0   1 15910.2 147.638   1
   4   0   1 7977.01 187.760   3
   5   0   1 4070.77 213.129   0
   5   0   1 3726.70 180.331   3
   5   0   1 3574.69 103.234   1
   6   0   1 1983.68 117.592   1
   6   0   1 2839.13 222.927   0
   7   0   1 12833.2 208.069   1
   7   0   1 15405.0 381.546   0
   8   0   1 105887. 718.465   0
   8   0   1 95366.2 399.986   1
   9   0   1 102654. 849.158   0
  10   0   1 1919.32 282.179   0
  11   0   1 2093.97 301.071   0
  12   0   1 3396.11 313.628   0
  13   0   1 239.345 175.021   0
  14   0   1 1906.37 321.362   0
  15   0   1 1741.38 368.210   0
  16   0   1 35.6920 139.217   0
  17   0   1 1739.38 370.050   0
  17  -1  -1 169.588 265.717   0
  17   1  -1 15.8609 127.464   0
  16  -1  -1 1344.08 337.748   0
  16   1  -1 1268.00 316.079   0
  15   1  -1 171.658 192.210   0
  15  -1  -1 610.701 294.131   0
 -15  -1   1 502.442 197.684   2
  14   1  -1 1766.80 299.579   0
  14  -1  -1 1557.96 287.239   0
 -14  -1   1 1571.83 273.749   2
  13   1  -1 1919.09 328.330   0
  13  -1  -1 1724.35 305.269   0
  12  -1  -1 877.058 260.677   0
  12   1  -1 620.866 255.579   0
  11  -1  -1 3837.23 337.993   0
  11   1  -1 3090.38 269.761   0
  10  -1  -1 20975.1 502.736   3
  10  -1  -1 49446.7 768.325   0
  10   1  -1 44777.8 762.738   0
   9   1  -1 120280. 886.058   0
   9  -1  -1 124840. 875.910   0
   9  -1  -1 128789. 857.651   3
   8  -1  -1 10237.8 373.655   0
   8  -1  -1 10346.1 333.395   3
   8   1  -1 5953.81 125.384   1
   8   1  -1 8355.27 400.567   0
   7  -1  -1 10995.4 276.967   3
   7  -1  -1 10615.8 279.941   0
   7   1  -1 10597.4 150.478   1
   7   1  -1 10907.1 299.253   0
   6   1  -1 3490.96 110.933   1
   6  -1  -1 3429.96 171.255   3
   6   1  -1 3770.58 241.454   0
   6  -1  -1 3143.58 183.213   0
   5   1  -1 182.629 126.759   0
   5  -1  -1 438.150 96.7650   0
   5  -1  -1 329.801 139.651   3
   4  -1  -1 21422.0 243.566   3
   4  -1  -1 20895.3 256.708   0
   4   1  -1 24041.9 312.546   0
   3   1  -1 52612.9 308.174   0
   3  -1  -1 53996.9 293.609   3
   3  -1  -1 58041.3 319.023   0
   2  -1  -1 11022.2 126.327   0
   2   1  -1 11452.9 147.207   0
   2  -1  -1 10899.3 114.210   3
  -2  -1   1 10301.9 127.115   2
  -1  -1   1 762.221 38.5199   2
   1  -1  -1 346.588 26.2518   3
  -1  -1   1 134.474 27.3107   1
   1   1   1 125873. 1124.28   0
   1  -1   1 129593. 1132.55   3
   1  -1   1 136440. 304.459   0
   1  -1   1 132150. 284.200   2
   1  -1   1 131890. 279.643   1
   1   1   1 130807. 289.152   1
   2  -1   1 371013. 1872.17   1
   2   1   1 395348. 2486.62   0
   2   1   1 352292. 1994.62   1
   2  -1   1 400341. 2464.46   0
   2  -1   1 379598. 2441.78   3
   3   1   1 31617.4 221.721   1
   3   1   1 36164.2 348.083   0
   3  -1   1 30388.8 268.593   3
   3  -1   1 30345.1 176.912   1
   3  -1   1 33566.0 268.488   0
   4  -1   1 2495.46 215.907   0
   4   1   1 2656.82 220.083   0
   4   1   1 3038.42 143.496   1
   4  -1   1 1599.56 84.7582   1
   4  -1   1 1769.69 139.415   3
   5  -1   1 167.697 69.5673   1
   5   1   1 292.345 89.4826   1
   5   1   1 353.304 155.275   0
   5  -1   1 343.513 134.552   3
   5  -1   1 270.963 134.763   0
   6   1   1 17317.2 217.238   1
   6  -1   1 18295.5 358.488   3
   6   1   1 18946.4 366.229   0
   6  -1   1 18904.6 327.331   0
   6  -1   1 16698.3 170.644   1
   7   1   1 47164.9 493.487   0
   7  -1   1 48535.2 538.775   3
   7   1   1 40472.3 288.486   1
   7  -1   1 39111.0 246.177   1
   7  -1   1 49650.5 560.058   0
   8   1   1 17581.4 443.290   0
   8  -1   1 9577.61 152.962   1
   8   1   1 9261.54 202.508   1
   8  -1   1 10288.1 370.603   3
   8  -1   1 21540.7 480.058   0
   9   1   1 56461.2 720.594   0
   9   1   1 40272.4 346.488   1
   9  -1   1 59148.4 719.777   0
  10   1   1 38956.2 626.842   0
  10  -1   1 39797.7 630.982   0
  11  -1   1 4530.46 415.972   0
  11   1   1 3983.86 446.606   0
  12  -1   1 2264.69 276.411   0
  12   1   1 2702.31 340.899   0
  13  -1   1 158.244 160.025   0
  13   1   1 72.6502 136.086   0
  14  -1   1 46.4711 135.880   0
  14   1   1 186.955 193.216   0
  15   1   1 343.315 236.629   0
  15  -1   1 252.909 199.345   0
  16  -1   1 2314.54 376.679   0
  16   1   1 2058.70 398.276   0
  17  -1   1 2598.49 399.424   0
  17   1   1 2424.56 436.456   0
  17  -2  -1 826.912 268.711   0
  17   2  -1 918.876 295.628   0
  16   2  -1 680.044 283.995   0
  16  -2  -1 191.232 219.898   0
  15  -2  -1 257.235 234.856   0
  15   2  -1 143.395 210.565   0
 -14  -2   1 77.8918 113.728   2
  14   2  -1 124.528 137.750   0
  14  -2  -1 218.812 181.395   0
  13  -2  -1 1591.37 225.003   0
  13   2  -1 2126.99 359.585   0
 -13  -2   1 2031.46 267.026   2
  12   2  -1 9452.16 544.399   0
 -12  -2   1 7758.64 337.414   2
  12  -2  -1 7778.26 417.523   3
  12  -2  -1 8454.56 475.124   0
 -11  -2   1 5105.30 275.043   2
  11  -2  -1 4060.03 279.973   0
  11   2  -1 3743.91 265.886   0
  11  -2  -1 6465.09 379.884   3
  10  -2  -1 13609.4 442.295   3
  10  -2  -1 10490.0 419.974   0
  10   2  -1 10005.8 448.720   0
   9   2  -1 993.250 123.787   1
   9   2  -1 2167.70 320.876   0
   9  -2  -1 1597.30 211.970   0
   9  -2  -1 4022.03 363.056   3
   8  -2  -1 11967.6 400.164   0
   8   2  -1 9079.08 189.880   1
   8   2  -1 10038.2 353.440   0
   8  -2  -1 10877.2 330.988   3
   7  -2  -1 250.230 142.772   3
   7  -2  -1 72.0327 81.2938   0
   7   2  -1 675.773 234.366   0
   7   2  -1 454.117 98.0050   1
   6  -2  -1 6274.56 284.405   0
   6  -2  -1 6013.79 205.952   3
   6   2  -1 7374.07 328.539   0
   5  -2  -1 5099.76 211.507   0
   5   2  -1 6210.38 219.008   0
   5  -2  -1 5301.81 198.613   3
  -5  -2   1 5193.13 185.999   2
   4   2  -1 21850.5 277.392   0
   4  -2  -1 19851.4 247.252   0
   4  -2  -1 20630.0 254.289   3
  -4  -2   1 19910.0 246.739   2
   3  -2  -1 43069.9 290.733   0
   3  -2  -1 42468.1 274.084   3
  -3  -2   1 41961.2 277.566   2
   3   2  -1 45035.1 311.393   0
   2  -2  -1 480646. 2574.45   3
   2   2  -1 517239. 2516.16   0
   2  -2  -1 481530. 2350.51   0
  -2  -2   1 478802. 2481.01   2
  -1  -2   1 157779. 347.662   2
   1  -2  -1 151380. 331.002   3
   0   2   1 86911.2 259.246   1
   0  -2  -1 83437.3 247.233   3
   0  -2   1 90947.2 223.166   3
   0  -2   1 95076.3 271.674   1
   0   2   1 44601.3 137.410   0
   0  -2   1 90641.8 261.198   2
   0  -2  -1 50054.4 153.082   2
   1  -2   1 12141.5 118.380   0
   1   2   1 12894.7 123.791   0
   1  -2   1 11031.3 118.491   3
   1  -2   1 12203.1 141.325   1
   1   2   1 12062.4 152.700   1
   1  -2   1 12278.8 162.209   2
   2  -2   1 166505. 375.547   1
   2  -2   1 158805. 469.287   3
   2  -2   1 167605. 421.052   0
   2   2   1 160599. 428.598   1
   2   2   1 181512. 464.538   0
  -2  -2  -1 156906. 970.964   2
   2  -2   1 173115. 454.604   2
   3  -2   1 50068.2 372.053   0
   3  -2   1 44849.7 320.085   3
   3   2   1 51634.0 359.725   0
  -3  -2  -1 43364.2 197.756   2
   3  -2   1 45339.7 216.851   1
   3   2   1 42730.1 273.105   1
   4  -2   1 29553.9 301.753   3
   4   2   1 29594.4 248.543   1
   4  -2   1 23732.2 174.130   1
   4   2   1 33300.7 347.137   0
   4  -2   1 31136.3 311.498   0
   5  -2   1 2634.52 155.515   3
   5   2   1 3196.34 190.882   0
   5  -2   1 2537.94 81.5624   1
   5   2   1 2477.76 106.724   1
   5  -2   1 3005.37 202.279   0
   6   2   1 9144.27 202.709   1
   6  -2   1 8280.76 296.697   3
   6  -2   1 7675.09 126.201   1
   6   2   1 9440.20 282.559   0
   6  -2   1 10020.2 328.297   0
   7   2   1 3823.22 181.563   1
   7  -2   1 4361.36 261.070   0
   7   2   1 4523.54 305.067   0
   7  -2   1 2315.49 116.659   1
   7  -2   1 5071.66 320.265   3
   8   2   1 53853.6 635.634   0
   8   2   1 45191.7 350.632   1
   8  -2   1 52678.9 574.209   0
   8  -2   1 50704.7 563.329   3
   8  -2   1 47152.4 280.302   1
   9  -2   1 47648.2 611.463   0
   9   2   1 38561.1 365.550   1
   9   2   1 42609.3 597.376   0
   9  -2   1 56406.0 719.085   3
  10   2   1 2697.40 324.938   0
  10  -2   1 2779.39 305.126   0
  10  -2   1 1098.35 205.936   3
  11   2   1 5342.78 376.362   0
  11  -2   1 4995.02 333.868   0
  12  -2   1 150.204 111.007   0
  12   2   1 443.398 204.505   0
  13   2   1 689.889 210.719   0
  13  -2   1 941.655 203.516   0
  14  -2   1 242.968 234.303   0
  14   2   1 416.349 210.620   0
  15  -2   1 116.266 177.805   0
  15   2   1 249.583 243.266   0
  16  -2   1 120.424 195.190   0
  16   2   1 20.2371 149.367   0
  17  -2   1 298.697 205.147   0
  17   2   1 288.900 253.290   0
  17   3  -1 609.403 291.713   0
  17  -3  -1 544.951 299.286   0
  16   3  -1 173.710 175.070   0
  16  -3  -1 444.773 239.463   0
  15   3  -1 2007.30 424.500   0
  15  -3  -1 1471.48 326.237   0
 -14  -3   1 111.021 131.101   2
  14  -3  -1 312.487 231.269   0
  14   3  -1 187.505 235.242   0
  13   3  -1 255.895 197.967   0
  13  -3  -1-22.1685 91.3968   3
  13  -3  -1 83.9863 93.7379   0
 -13  -3   1 201.540 138.637   2
  12   3  -1 630.722 246.060   0
 -12  -3   1 202.837 133.519   2
  12  -3  -1 451.949 194.595   0
  12  -3  -1 430.277 211.467   3
  11  -3  -1 374.778 178.069   0
 -11  -3   1 398.051 200.063   2
  11   3  -1 257.582 183.300   0
  11  -3  -1 453.013 233.827   3
  10  -3  -1 4670.44 265.030   0
  10  -3  -1 5462.98 369.584   3
 -10  -3   1 6598.11 352.734   2
  10   3  -1 4407.15 224.195   0
   9  -3  -1 7121.17 290.350   3
  -9  -3   1 8789.78 302.586   2
   9  -3  -1 8172.10 332.063   0
   9   3  -1 7658.84 217.431   1
   9   3  -1 7545.81 348.040   0
  -8  -3   1 32008.4 416.717   2
   8  -3  -1 32430.9 533.121   0
   8   3  -1 31629.6 319.465   1
   8  -3  -1 31568.4 468.909   3
   8   3  -1 32570.0 510.526   0
  -7  -3   1 14127.2 306.697   2
   7   3  -1 13989.1 331.233   0
   7  -3  -1 13985.4 303.970   3
   7  -3  -1 14123.0 323.955   0
   6  -3  -1 28175.8 364.573   3
   6  -3  -1 28910.6 383.380   0
  -6  -3   1 26120.7 283.267   2
   6   3  -1 29320.9 436.429   0
   5  -3  -1 35180.3 335.481   0
   5   3  -1 37009.4 347.930   0
   5  -3  -1 38855.8 369.766   3
  -5  -3   1 35054.0 317.057   2
   4  -3  -1 34404.2 298.316   3
   4   3  -1 41099.8 317.598   0
  -4  -3   1 38756.4 293.971   2
   4  -3  -1 40158.0 315.711   0
   3  -3  -1 4166.27 133.576   3
   3  -3  -1 4002.77 132.023   0
  -3  -3   1 4258.75 124.603   2
   3   3  -1 4672.52 146.540   0
   2  -3  -1 96587.0 319.668   0
   2  -3  -1 94281.4 361.129   3
  -2  -3   1 97491.3 364.032   2
   2   3  -1 100854. 334.304   0
  -1  -3   1 481651. 2259.72   3
  -1  -3   1 489036. 2623.52   2
   1  -3  -1 489550. 2655.57   3
   0  -3   1 83556.4 309.640   2
   0  -3   1 82756.7 275.215   3
   0  -3  -1 82255.2 306.493   3
   0  -3  -1 85030.6 262.901   2
   1  -3   1 330551. 2209.19   3
   1  -3   1 333210. 1739.95   0
   1  -3   1 332090. 2352.31   2
  -1  -3  -1 324091. 1591.40   2
   1   3   1 331773. 1846.46   0
   2   3   1 14406.9 217.544   1
   2  -3   1 14559.6 190.393   1
   2  -3   1 13088.6 184.481   3
  -2  -3  -1 13169.3 113.937   2
   2  -3   1 13670.3 173.962   0
   2  -3   1 13157.0 217.318   2
   2   3   1 14341.0 194.703   0
   3  -3   1 714.818 129.687   3
   3   3   1 808.561 131.097   1
   3  -3   1 585.659 121.769   0
  -3  -3  -1 392.064 58.2028   2
   3   3   1 614.841 119.607   0
   3  -3   1 559.939 89.9677   1
   4  -3   1 18463.9 271.946   0
   4  -3   1 17998.8 181.550   1
   4   3   1 20225.9 300.978   0
   4   3   1 16628.9 233.887   1
   4  -3   1 17469.1 263.557   3
  -4  -3  -1 16904.6 173.078   2
   5   3   1 9220.50 220.707   0
  -5  -3  -1 6019.84 126.908   2
   5   3   1 8578.70 188.257   1
   5  -3   1 7017.40 139.829   1
   5  -3   1 7948.24 217.198   0
   5  -3   1 6155.19 200.579   3
  -6  -3  -1 15144.8 227.894   2
   6   3   1 14988.6 258.075   1
   6  -3   1 17412.5 346.152   0
   6  -3   1 14668.2 278.524   3
   6   3   1 16538.4 319.541   0
   6  -3   1 15686.5 177.659   1
  -7  -3  -1 4261.80 190.675   2
   7  -3   1 4540.98 232.969   0
   7  -3   1 3819.68 123.254   1
   7   3   1 3910.03 192.225   1
   7   3   1 4961.62 286.406   0
   7  -3   1 3582.38 211.306   3
   8   3   1 15574.0 453.257   0
   8   3   1 14674.2 309.415   1
   8  -3   1 16390.9 448.410   0
   8  -3   1 13297.9 183.912   1
  -8  -3  -1 14989.1 281.912   2
   8  -3   1 14184.7 411.909   3
   9  -3   1 1563.00 251.760   0
   9   3   1 715.087 135.733   1
   9   3   1 1365.01 291.427   0
  -9  -3  -1 1425.65 164.736   2
   9  -3   1 2659.94 316.266   3
  10  -3   1 254.289 171.982   3
  10   3   1 148.479 107.577   0
 -10  -3  -1 616.908 170.206   2
  10  -3   1 94.6354 110.815   0
  11   3   1 248.033 133.126   0
  11  -3   1 318.793 183.624   0
  11  -3   1 337.739 197.961   3
 -11  -3  -1 362.954 170.407   2
  12  -3   1 75.2463 118.604   0
  12  -3   1-1.68792 69.9458   3
  12   3   1 72.0466 126.208   0
  13   3   1 1277.40 338.936   0
  13  -3   1 862.461 242.667   0
  14   3   1 1592.67 291.604   0
  14  -3   1 1778.30 337.231   0
  15  -3   1 108.232 192.119   0
  15   3   1 142.622 160.890   0
  16  -3   1 15.2913 150.276   0
  16   3   1 82.4296 132.740   0
  17  -3   1 228.019 180.727   0
  17   3   1 124.604 174.970   0
  17  -4  -1 351.266 227.237   0
  17   4  -1 122.505 188.330   0
  16  -4  -1 397.430 196.311   0
  16   4  -1 786.669 251.999   0
  15  -4  -1 2935.54 442.834   0
  15   4  -1 2716.24 381.539   0
  14  -4  -1 5988.12 450.724   0
  14   4  -1 7183.19 497.041   0
  14  -4  -1 884.870 249.234   3
  13   4  -1 2863.45 375.925   0
  13  -4  -1 2451.86 304.739   3
 -13  -4   1 2067.30 252.952   2
  13  -4  -1 2608.58 320.771   0
 -12  -4   1 222.759 140.266   2
  12  -4  -1 147.376 214.159   0
  12   4  -1 364.538 192.581   0
  12  -4  -1 89.0993 115.608   3
  11  -4  -1 454.269 191.624   0
  11   4  -1 126.922 144.624   0
  11  -4  -1 184.582 95.8191   3
 -11  -4   1 282.192 155.093   2
 -10  -4   1 349.104 174.865   2
  10  -4  -1 137.384 105.423   3
  10  -4  -1 148.610 93.8766   0
  10   4  -1 137.558 101.119   0
   9  -4  -1 22736.3 436.731   0
   9  -4  -1 22896.0 468.309   3
   9   4  -1 24201.9 350.518   1
  -9  -4   1 23897.3 413.955   2
   9   4  -1 23072.7 445.655   0
   8  -4  -1 3787.97 228.368   0
  -8  -4   1 4007.77 225.278   2
   8  -4  -1 4478.26 252.168   3
   8   4  -1 5194.71 212.014   1
   8   4  -1 3900.20 292.980   0
   7  -4  -1 5348.78 235.031   0
   7   4  -1 5672.18 270.794   0
  -7  -4   1 5388.06 216.070   2
   7  -4  -1 5119.70 254.871   3
   6   4  -1 13173.0 274.896   0
   6  -4  -1 13227.2 308.924   3
  -6  -4   1 11885.5 257.730   2
   6  -4  -1 12678.5 270.836   0
   5  -4  -1 124167. 571.309   3
   5  -4  -1 122659. 556.489   0
   5   4  -1 125218. 553.831   0
  -5  -4   1 114216. 476.284   2
   4  -4  -1 66215.5 385.713   0
  -4  -4   1 66627.8 376.272   2
   4   4  -1 68012.5 421.679   0
   4  -4  -1 66873.2 415.699   3
   3  -4  -1 3327.57 153.036   0
   3  -4  -1 2821.26 137.908   3
   3   4  -1 3512.70 148.057   0
  -3  -4   1 2876.62 127.649   2
   2   4  -1 18002.5 170.490   0
   2  -4  -1 17452.3 162.338   0
  -2  -4   1 18711.9 211.303   2
   2  -4  -1 18534.5 219.260   3
   1  -4  -1 1422.43 166.515   3
  -1  -4   1 892.299 114.458   3
  -1  -4   1 854.978 116.089   2
   1   4  -1 782.515 62.2392   0
   1  -4  -1 1274.52 163.799   2
   0  -4   1 84671.7 323.253   3
   0  -4  -1 90641.4 374.545   3
   0  -4  -1 94830.5 340.559   2
   0  -4   1 87312.6 360.446   2
   1  -4   1 153223. 313.638   0
  -1  -4  -1 151910. 373.021   2
   1   4   1 161054. 1297.53   0
   1  -4   1 146345. 440.733   3
   1  -4   1 155680. 504.582   2
   2   4   1 22165.7 225.582   0
  -2  -4  -1 20499.6 163.659   2
   2  -4   1 21314.8 290.058   2
   2  -4   1 21167.0 184.534   0
   2  -4   1 20603.1 248.329   3
   3  -4   1 14589.6 217.258   3
   3  -4   1 17298.9 224.281   0
   3   4   1 16922.9 218.943   0
   3  -4   1 16907.0 281.222   2
  -3  -4  -1 15937.8 153.394   2
  -4  -4  -1 17055.0 166.249   2
   4  -4   1 19944.7 311.614   3
   4   4   1 19983.7 284.186   0
   4   4   1 17829.7 236.414   1
   4  -4   1 19115.3 279.219   0
   5  -4   1 280656. 836.036   0
   5  -4   1 265449. 881.946   3
   5  -4   1 277492. 595.378   1
  -5  -4  -1 260820. 608.184   2
   5   4   1 275731. 789.739   1
   5   4   1 300304. 907.087   0
  -6  -4  -1 1023.94 109.147   2
   6   4   1 1279.88 180.731   1
   6  -4   1 1571.46 112.998   1
   6   4   1 1678.83 191.497   0
   6  -4   1 933.756 105.390   3
   6  -4   1 1174.76 161.726   0
   7   4   1 30154.7 516.359   0
  -7  -4  -1 25084.1 295.692   2
   7  -4   1 25817.9 428.015   3
   7   4   1 24991.6 332.046   1
   7  -4   1 28179.2 466.201   0
  -8  -4  -1 2004.03 198.396   2
   8  -4   1 1753.40 206.630   0
   8  -4   1 1525.67 161.028   3
   8   4   1 1570.76 144.125   1
   8   4   1 1955.20 250.620   0
   9   4   1 204.103 182.361   0
   9  -4   1 32.7110 84.6986   3
  -9  -4  -1 128.464 100.904   2
   9  -4   1 3.02457 77.0622   0
   9   4   1 277.473 147.922   1
  10  -4   1 294.030 178.320   0
  10   4   1 386.858 189.998   0
  10   4   1 425.091 123.625   1
 -10  -4  -1 632.172 212.505   2
  10  -4   1 350.402 191.872   3
 -11  -4  -1 292.041 115.500   2
  11  -4   1 491.619 200.961   3
  11  -4   1 571.538 278.357   0
  11   4   1 427.062 210.562   0
  12  -4   1 2430.24 284.054   3
  12  -4   1 3411.90 311.387   0
  12   4   1 3941.87 369.258   0
  13  -4   1 119.285 112.954   0
  13   4   1 357.231 239.100   0
  13  -4   1 107.506 127.857   3
  14   4   1 6565.52 448.902   0
  14  -4   1 6165.49 515.693   0
  15  -4   1 1913.44 316.302   0
  15   4   1 2732.99 408.423   0
  16  -4   1 198.512 221.757   0
  16   4   1 93.2309 185.810   0
  17  -4   1 50.1026 145.986   0
  17   4   1 72.0221 153.141   0
  17   5  -1 602.676 254.038   0
  17  -5  -1 376.958 192.468   0
  16  -5  -1 832.447 356.425   0
  16   5  -1 618.596 281.040   0
  15  -5  -1 1855.41 304.793   0
  15  -5  -1 1489.10 267.881   3
  15   5  -1 2565.60 434.442   0
  14  -5  -1 1371.02 421.885   0
  14  -5  -1 936.270 292.953   3
  14   5  -1 877.309 320.839   0
  13  -5  -1 9197.73 474.809   0
  13  -5  -1 10335.8 484.518   3
  13   5  -1 10058.7 568.000   0
  12  -5  -1 4535.68 366.669   3
 -12  -5   1 3750.11 279.234   2
  12   5  -1 5307.32 352.592   0
  12  -5  -1 5074.42 422.206   0
 -11  -5   1 183.756 123.780   2
  11  -5  -1 276.319 165.704   3
  11   5  -1 430.754 203.761   0
  11  -5  -1 546.850 236.981   0
  10   5  -1 2318.69 204.238   1
 -10  -5   1 1994.24 197.635   2
  10   5  -1 1547.91 195.833   0
  10  -5  -1 2128.27 287.711   3
  10  -5  -1 1650.86 179.075   0
  -9  -5   1 1776.96 162.752   2
   9   5  -1 2741.49 203.647   1
   9  -5  -1 1357.24 141.269   0
   9   5  -1 1238.04 135.009   0
   9  -5  -1 2631.25 322.273   3
  -8  -5   1 14381.2 312.160   2
   8  -5  -1 14932.3 380.540   3
   8  -5  -1 13910.7 300.314   0
   8   5  -1 14608.3 356.222   0
   7   5  -1 16411.7 345.215   0
  -7  -5   1 15762.3 282.032   2
   7  -5  -1 16339.5 331.414   3
   7  -5  -1 16506.6 357.765   0
   6   5  -1 70144.0 504.504   0
   6  -5  -1 71248.8 515.522   0
  -6  -5   1 68974.4 452.945   2
   6  -5  -1 78906.4 596.494   3
   5  -5  -1 198752. 658.114   0
   5   5  -1 214359. 737.292   0
   5  -5  -1 221682. 815.127   3
  -5  -5   1 209989. 694.270   2
   4   5  -1 14722.7 262.274   0
   4  -5  -1 13923.7 215.395   0
  -4  -5   1 14234.6 236.564   2
   4  -5  -1 14137.1 286.816   3
   3  -5  -1 6541.26 182.250   0
  -3  -5   1 5715.15 144.627   2
   3  -5  -1 6030.28 203.099   3
   3   5  -1 6268.99 161.765   0
   2  -5  -1 4556.90 101.047   0
   2   5  -1 4546.47 97.6697   0
  -2  -5   1 4442.94 138.321   2
  -2  -5   1 4102.77 133.094   3
   2  -5  -1 4444.81 158.232   3
   1  -5  -1 177485. 546.834   2
  -1  -5   1 193469. 574.710   2
   1   5  -1 180613. 1174.97   0
   1  -5  -1 183590. 563.668   3
  -1  -5   1 182920. 523.342   3
   0  -5  -1 5093.79 186.591   2
   0  -5   1 4766.39 144.395   3
   0  -5  -1 4346.55 170.858   3
   0  -5   1 4692.30 142.916   2
   1  -5   1 6548.13 90.2738   0
  -1  -5  -1 8381.25 190.053   3
   1  -5   1 8204.55 190.167   3
   1   5   1 8485.17 114.520   0
  -1  -5  -1 8697.11 156.515   2
   1  -5   1 9534.42 247.156   2
   2  -5   1 14054.5 245.316   3
   2  -5   1 13930.2 164.887   0
   2   5   1 14436.5 172.556   0
   2  -5   1 13819.1 245.858   2
  -2  -5  -1 13886.8 167.209   2
   3  -5   1 50040.9 408.312   2
   3  -5   1 46331.7 374.179   3
   3   5   1 51063.7 336.840   0
   3  -5   1 49872.3 326.069   0
  -3  -5  -1 46019.7 253.601   2
   4  -5   1 466630. 3523.77   0
   4   5   1 472945. 3738.82   0
  -4  -5  -1 416409. 2692.62   2
   4  -5   1 433961. 1036.85   3
   5   5   1 1103.37 200.902   1
   5   5   1 721.436 174.837   0
   5  -5   1 551.982 130.528   0
   5  -5   1 983.814 222.712   3
  -5  -5  -1 379.665 70.2785   2
   6  -5   1 25974.3 395.307   3
  -6  -5  -1 26842.1 266.092   2
   6   5   1 30753.0 438.370   0
   6   5   1 28474.3 350.724   1
   6  -5   1 28504.7 369.843   0
   7  -5   1 1704.37 202.661   3
   7   5   1 1730.16 187.978   0
   7  -5   1 1484.50 186.166   0
  -7  -5  -1 1362.69 119.731   2
   7   5   1 1519.50 183.835   1
  -8  -5  -1 4601.86 175.908   2
   8  -5   1 5093.66 290.816   0
   8   5   1 4863.07 257.635   1
   8  -5   1 6417.70 350.239   3
   8   5   1 5449.37 311.945   0
   9  -5   1 5491.39 321.064   3
   9   5   1 5692.39 372.541   0
  -9  -5  -1 5426.03 256.004   2
   9   5   1 4685.33 207.648   1
   9  -5   1 5444.35 313.809   0
  10   5   1 591.994 150.424   1
  10  -5   1 366.813 150.030   0
 -10  -5  -1 230.433 98.8894   2
  10  -5   1 432.725 175.044   3
  10   5   1 439.694 187.034   0
  11  -5   1 741.580 268.081   3
  11  -5   1 975.579 246.396   0
  11   5   1 1419.11 359.219   0
  12  -5   1 2541.74 317.594   3
  12   5   1 2404.24 364.328   0
  12  -5   1 2433.16 379.147   0
  13  -5   1 24261.0 739.927   3
  13   5   1 25254.8 742.439   0
  13  -5   1 22020.8 646.710   0
  14  -5   1 3421.68 358.392   0
  14   5   1 4331.15 457.312   0
  14  -5   1 3687.88 370.260   3
  15  -5   1 536.998 266.506   0
  15   5   1 352.164 196.011   0
  16  -5   1-39.5218 94.9473   0
  16   5   1 16.2979 128.660   0
  17  -5   1 28.1041 124.029   0
  17  -6  -1 183.569 200.738   0
  17   6  -1 146.734 212.646   0
  16   6  -1 135.211 188.427   0
  16  -6  -1 58.5671 137.266   0
  16  -6  -1 247.313 212.772   3
  15   6  -1 933.540 320.787   0
  15  -6  -1 1223.77 277.137   0
  15  -6  -1 881.534 287.840   3
  14   6  -1 17998.5 618.518   0
  14  -6  -1 18756.7 659.180   0
  14  -6  -1 18798.0 636.575   3
  13   6  -1 8258.70 445.108   0
  13  -6  -1 8239.78 458.074   0
  13  -6  -1 8874.43 473.589   3
  12   6  -1 4052.11 312.071   0
  12  -6  -1 4602.08 362.908   0
  12  -6  -1 3980.43 402.500   3
 -12  -6   1 3170.94 299.120   2
  11  -6  -1 4003.26 342.032   0
 -11  -6   1 2724.79 190.905   2
  11   6  -1 5148.87 449.722   0
  11  -6  -1 3299.35 291.058   3
  10  -6  -1 143.821 163.797   0
 -10  -6   1 27.7567 65.0452   2
  10   6  -1 242.315 187.578   0
  10  -6  -1 107.565 96.7904   3
  10   6  -1 316.644 143.328   1
   9  -6  -1 2875.89 179.423   0
  -9  -6   1 2997.93 213.586   2
   9   6  -1 4324.53 270.526   1
   9  -6  -1 3732.19 337.111   3
   9   6  -1 3029.39 206.404   0
   8  -6  -1 2850.03 233.633   3
   8  -6  -1 2252.02 161.131   0
  -8  -6   1 2735.15 215.235   2
   8   6  -1 2158.62 164.900   0
   7  -6  -1 727.081 153.821   3
  -7  -6   1 892.910 160.803   2
   7   6  -1 705.312 112.458   0
   7  -6  -1 572.683 102.920   0
   6  -6  -1 3489.44 216.335   3
   6  -6  -1 3294.41 185.850   0
   6   6  -1 3142.04 177.955   0
  -6  -6   1 2885.41 162.897   2
   5  -6  -1 148940. 605.010   0
   5   6  -1 150125. 624.439   0
   5  -6  -1 154732. 749.822   3
  -5  -6   1 145182. 602.834   2
   4  -6  -1 468514. 1146.71   3
   4   6  -1 462124. 3444.59   0
  -4  -6   1 422030. 909.231   2
   4  -6  -1 450546. 3197.97   0
  -3  -6   1 2848.56 171.018   2
   3  -6  -1 1773.40 121.824   3
   3  -6  -1 2075.50 95.2473   0
   3   6  -1 2374.65 127.031   0
   2  -6  -1 38497.3 360.080   3
   2  -6  -1 37899.2 201.377   0
  -2  -6   1 36543.0 308.366   2
   2  -6  -1 39609.0 357.097   2
   2   6  -1 37925.3 216.988   0
  -2  -6   1 35366.3 287.920   3
   1  -6  -1 2245.54 57.4441   0
   1  -6  -1 2548.68 195.090   3
   1   6  -1 2156.00 70.8235   0
  -1  -6   1 2019.09 117.745   3
   1  -6  -1 2576.12 156.538   2
  -1  -6   1 2696.75 168.702   2
   0  -6   1 16109.7 239.987   2
   0  -6  -1 17131.4 234.323   2
   0  -6   1 15146.1 213.204   3
   0  -6  -1 16032.0 240.055   3
   1  -6   1 29235.4 302.072   3
   1  -6   1 28501.5 142.652   0
  -1  -6  -1 28711.5 297.220   3
   1   6   1 29906.2 171.430   0
   1  -6   1 31458.9 361.801   2
  -1  -6  -1 30172.3 275.731   2
   2  -6   1 28877.9 196.759   0
  -2  -6  -1 27773.6 231.476   2
   2  -6   1 27742.1 333.075   3
   2   6   1 29016.9 223.298   0
   2  -6   1 27867.5 328.112   2
   3  -6   1 105965. 564.990   2
   3  -6   1 107227. 429.937   0
   3   6   1 104687. 454.607   0
  -3  -6  -1 101285. 403.257   2
   3  -6   1 103235. 571.953   3
  -4  -6  -1 37781.2 291.891   2
   4   6   1 40964.5 398.625   0
   4  -6   1 33930.3 404.113   3
   4  -6   1 38879.0 414.113   2
   4  -6   1 34148.6 337.800   0
  -5  -6  -1 147695. 518.849   2
   5  -6   1 152158. 658.487   0
   5   6   1 156005. 719.565   1
   5   6   1 160823. 704.982   0
   5  -6   1 158307. 810.313   3
   6  -6   1 7310.82 261.159   0
   6   6   1 7105.94 301.168   0
   6  -6   1 6507.65 324.025   3
   6   6   1 7702.67 304.748   1
  -6  -6  -1 6370.48 191.675   2
  -7  -6  -1 10503.8 241.914   2
   7   6   1 10692.7 394.563   0
   7   6   1 9483.29 305.604   1
   7  -6   1 9843.46 292.579   0
   7  -6   1 9892.16 321.950   3
   8   6   1 588.305 165.367   0
   8  -6   1 842.686 231.042   3
   8   6   1 530.420 156.355   1
  -8  -6  -1 836.779 122.960   2
   8  -6   1 616.056 158.307   0
   9  -6   1 457.121 193.016   3
   9  -6   1 397.431 162.476   0
  -9  -6  -1 421.928 99.5842   2
   9   6   1 569.492 199.139   0
   9   6   1 358.260 145.965   1
  10  -6   1 335.673 129.115   0
  10   6   1 468.422 120.828   1
  10   6   1 825.091 228.414   0
  10  -6   1 733.117 218.647   3
  11   6   1 7001.60 416.282   0
  11  -6   1 7052.02 400.882   0
  11  -6   1 7531.88 469.414   3
  12  -6   1 21033.1 673.104   3
  12  -6   1 19518.3 604.022   0
  12   6   1 20301.0 670.980   0
  13  -6   1 341.859 146.795   3
  13   6   1 868.754 268.463   0
  13  -6   1 747.380 312.501   0
  14   6   1 6911.08 496.006   0
  14  -6   1 5994.41 411.980   0
  14  -6   1 6791.93 432.525   3
  15   6   1 209.846 137.482   0
  15  -6   1 245.309 170.991   0
  16   6   1 42.6738 159.371   0
  16  -6   1 22.2623 147.716   0
  17  -6   1 78.2882 168.233   0
  17  -7  -1 713.185 243.076   0
  17   7  -1 921.337 380.113   0
  16  -7  -1 175.849 191.159   3
  16  -7  -1 116.817 131.659   0
  16   7  -1 394.197 254.536   0
  15   7  -1 730.457 295.967   0
  15  -7  -1 1010.10 311.110   0
  15  -7  -1 352.401 238.006   3
  14  -7  -1 70.2871 130.638   0
  14   7  -1 82.8955 115.898   0
  14  -7  -1 195.957 146.956   3
  13   7  -1 7566.84 436.104   0
  13  -7  -1 8152.12 487.079   0
  13  -7  -1 7465.19 506.171   3
  12   7  -1 7352.29 428.336   0
  12  -7  -1 7392.70 439.205   0
  12  -7  -1 7621.88 477.447   3
 -11  -7   1 141.605 103.711   2
  11   7  -1 417.709 212.309   0
  11  -7  -1 194.181 201.088   0
  11  -7  -1 338.257 184.841   3
  10  -7  -1 578.118 184.939   3
  10   7  -1 1279.86 268.586   0
  10  -7  -1 1298.58 237.136   0
  10   7  -1 1462.97 239.534   1
 -10  -7   1 731.276 141.446   2
  -9  -7   1 122.338 106.191   2
   9   7  -1 14.8714 73.8871   0
   9  -7  -1 125.168 97.2244   0
   9  -7  -1 169.354 149.757   3
   8   7  -1 2304.94 174.506   0
   8  -7  -1 2764.46 211.776   3
   8  -7  -1 2251.57 182.782   0
  -8  -7   1 3070.34 226.521   2
   7   7  -1 25729.1 394.372   0
   7  -7  -1 25989.8 368.995   0
  -7  -7   1 25973.3 368.423   2
   7  -7  -1 26794.8 455.870   3
   6  -7  -1 69048.2 510.659   0
   6  -7  -1 70253.7 627.749   3
  -6  -7   1 68141.5 474.980   2
   6   7  -1 71601.0 553.399   0
   5  -7  -1 37831.7 435.551   3
  -5  -7   1 39157.6 383.210   2
   5  -7  -1 38609.4 355.527   0
   5   7  -1 40611.1 394.114   0
   4  -7  -1 2938.94 187.617   3
   4   7  -1 1835.69 137.328   0
   4  -7  -1 1837.88 170.689   0
  -4  -7   1 3020.74 190.653   2
   3   7  -1 153649. 482.770   0
  -3  -7   1 154250. 601.070   2
   3  -7  -1 165439. 470.135   0
   3  -7  -1 140397. 625.297   3
  -3  -7   1 153565. 616.834   3
   2  -7  -1 839.082 69.0495   0
   2   7  -1 1045.13 92.9709   0
  -2  -7   1 714.278 99.6223   2
  -2  -7   1 1012.69 154.957   3
   2  -7  -1 1247.10 148.557   2
   2  -7  -1 1002.99 175.620   3
  -1  -7   1 2004.54 127.210   2
   1  -7  -1 2100.65 133.103   3
   1  -7  -1 2248.94 178.164   2
  -1  -7   1 1896.36 125.762   3
   1   7  -1 2229.47 61.2087   0
   0  -7   1 4332.69 194.280   2
   0  -7   1 4125.90 137.772   3
   0  -7  -1 4095.34 159.395   3
   0  -7  -1 4803.70 187.736   2
   1   7   1 3877.75 75.6108   0
   1  -7   1 3835.19 149.282   3
  -1  -7  -1 4353.99 146.931   2
   1  -7   1 4526.92 247.015   2
  -1  -7  -1 4011.37 176.132   3
   2  -7   1 11290.2 148.684   0
   2  -7   1 12548.6 306.029   2
  -2  -7  -1 12276.2 296.193   3
   2   7   1 11870.3 164.248   0
   2  -7   1 9993.03 214.099   3
  -2  -7  -1 11105.5 197.253   2
   3  -7   1 220416. 820.880   2
   3  -7   1 205293. 768.233   3
   3   7   1 219723. 619.561   0
  -3  -7  -1 208861. 594.286   2
   3  -7   1 220452. 571.249   0
   4  -7   1 145326. 563.365   0
   4  -7   1 134366. 689.237   3
   4  -7   1 150704. 753.507   2
   4   7   1 147063. 607.402   0
  -4  -7  -1 141256. 516.640   2
   5   7   1 2412.64 162.176   0
   5  -7   1 2539.58 195.179   0
  -5  -7  -1 2497.21 155.507   2
   5  -7   1 1185.38 159.865   3
   6  -7   1 33552.4 405.814   0
   6   7   1 33475.5 416.425   0
   6  -7   1 32813.0 498.844   3
  -6  -7  -1 32994.2 336.045   2
   6   7   1 34242.6 478.454   1
   7   7   1 765.540 234.531   1
  -7  -7  -1 682.907 117.339   2
   7  -7   1 618.189 219.356   3
   7   7   1 574.941 144.935   0
   7  -7   1 775.100 178.889   0
  -8  -7  -1 4350.23 208.788   2
   8   7   1 4215.70 309.370   0
   8  -7   1 5128.86 385.045   3
   8  -7   1 4436.54 285.960   0
   8   7   1 4241.15 293.860   1
   9   7   1 349.253 164.319   1
   9  -7   1 599.806 186.129   3
  -9  -7  -1 499.024 138.578   2
   9  -7   1 426.704 128.537   0
   9   7   1 625.599 238.080   0
  10  -7   1 702.605 204.752   0
  10   7   1 718.684 230.969   0
  10  -7   1 397.906 120.936   3
  10   7   1 549.500 135.280   1
  11  -7   1 2781.49 343.685   0
  11  -7   1 2517.37 330.650   3
  11   7   1 2687.06 280.965   0
  12  -7   1 3621.71 373.967   0
  12  -7   1 4136.48 416.871   3
  12   7   1 3428.55 371.088   0
  13  -7   1 21913.5 712.338   0
  13   7   1 21555.4 702.800   0
  13  -7   1 22940.6 642.546   3
  14   7   1 2358.65 394.601   0
  14  -7   1 3392.65 384.290   3
  14  -7   1 2285.53 403.757   0
  15   7   1 461.172 253.890   0
  15  -7   1 413.540 226.027   0
  15  -7   1 499.247 243.379   3
  16  -7   1 25.9689 128.771   0
  16   7   1 93.6037 167.855   0
  17  -7   1 86.9737 127.732   0
  17   8  -1 56.9513 163.112   0
  17  -8  -1-16.3811 141.311   0
  16   8  -1 150.512 196.874   0
  16  -8  -1 73.7686 185.241   0
  16  -8  -1 99.4935 192.885   3
  15  -8  -1 175.875 186.977   3
  15   8  -1 152.339 151.866   0
  15  -8  -1 65.0720 105.731   0
  14   8  -1 2928.20 388.722   0
  14  -8  -1 2213.48 326.051   0
  14  -8  -1 1960.01 275.930   3
  13  -8  -1 4123.78 359.684   3
  13  -8  -1 5807.95 399.608   0
  13   8  -1 6159.66 503.448   0
  12  -8  -1 589.660 219.316   0
  12  -8  -1 900.658 306.949   3
  12   8  -1 892.177 288.733   0
 -11  -8   1 89.5518 106.509   2
  11  -8  -1 329.563 151.552   0
  11  -8  -1 92.7731 105.763   3
  11   8  -1 158.476 152.244   0
  10  -8  -1 675.522 211.809   0
  10   8  -1 830.413 281.194   0
  10  -8  -1 497.767 196.819   3
 -10  -8   1 455.254 104.459   2
  10   8  -1 1182.89 189.813   1
  -9  -8   1 1853.38 193.208   2
   9  -8  -1 2836.44 266.120   0
   9   8  -1 3318.02 308.776   0
   9  -8  -1 2290.62 285.613   3
   8   8  -1 162.401 87.7498   0
   8  -8  -1 192.103 90.9472   0
   8  -8  -1 280.209 205.454   3
  -8  -8   1 413.214 146.234   2
  -7  -8   1 45.2361 56.3511   2
   7   8  -1-27.7692 55.5534   0
   7  -8  -1 44.2171 63.4087   0
   7  -8  -1-42.1173 72.2462   3
   6   8  -1 1624.11 128.207   0
  -6  -8   1 1732.96 146.411   2
   6  -8  -1 1552.35 153.027   0
   6  -8  -1 1731.97 186.285   3
   5  -8  -1 16199.2 396.704   3
   5   8  -1 15215.4 275.241   0
  -5  -8   1 16357.8 325.569   2
   5  -8  -1 15670.6 259.304   0
   4  -8  -1 70070.6 373.746   0
   4  -8  -1 68557.7 551.115   3
  -4  -8   1 70565.5 474.194   2
   4   8  -1 70112.9 423.708   0
   3  -8  -1 26031.0 223.889   0
   3   8  -1 26005.1 252.500   0
  -3  -8   1 25491.8 338.770   2
  -3  -8   1 25250.7 312.592   3
   3  -8  -1 26358.7 354.516   3
   2   8  -1 2427.35 90.1355   0
   2  -8  -1 3198.78 211.660   2
   2  -8  -1 2601.73 65.6124   0
  -2  -8   1 2019.04 154.118   3
   2  -8  -1 2587.67 215.595   3
  -2  -8   1 2163.91 136.277   2
   1  -8  -1 61.3071 55.4788   2
   1   8  -1 77.1796 19.9184   0
  -1  -8   1 83.7439 60.4906   3
   1  -8  -1 136.647 106.863   3
  -1  -8   1 27.6245 54.0842   2
   0  -8  -1 1778.98 165.794   3
   0  -8  -1 1750.85 158.576   2
   0  -8   1 1634.08 143.646   2
   0  -8   1 1900.67 183.099   3
  -1  -8  -1 3558.95 181.854   2
  -1  -8  -1 3229.10 202.837   3
   1  -8   1 3377.33 171.354   2
   1   8   1 3286.39 71.2606   0
   1  -8   1 2963.31 168.956   3
   2  -8   1 18828.7 159.068   0
   2  -8   1 17219.9 330.733   2
   2   8   1 18260.2 185.504   0
   2  -8   1 17082.4 328.010   3
  -2  -8  -1 17340.7 253.053   2
  -2  -8  -1 16062.9 301.241   3
   3   8   1 57851.0 352.186   0
   3  -8   1 59520.7 526.864   2
   3  -8   1 54812.8 473.738   3
   3  -8   1 61585.4 319.498   0
  -3  -8  -1 54264.5 362.696   2
   4   8   1 817.946 112.995   0
   4  -8   1 1383.01 238.045   3
  -4  -8  -1 712.338 111.551   2
   4  -8   1 1386.97 194.560   2
   4  -8   1 652.996 104.628   0
   5  -8   1 49772.2 569.737   3
   5   8   1 49448.7 458.263   0
  -5  -8  -1 45746.1 373.849   2
   5  -8   1 47972.0 403.826   0
   6  -8   1 2662.26 207.263   0
   6  -8   1 1936.25 185.059   3
   6   8   1 3854.28 311.955   1
  -6  -8  -1 2374.12 169.262   2
   6   8   1 2446.80 228.107   0
   7   8   1 306.518 196.477   1
   7   8   1 168.604 145.934   0
   7  -8   1 63.1344 154.969   3
   7  -8   1 157.967 125.269   0
  -7  -8  -1 144.917 66.6245   2
   8   8   1 517.931 212.786   1
   8   8   1 365.305 162.811   0
   8  -8   1 207.202 95.2752   3
  -8  -8  -1 126.212 84.5662   2
   8  -8   1 277.386 152.910   0
   9   8   1 970.893 243.401   1
   9  -8   1 677.869 187.338   3
   9   8   1 1136.13 240.848   0
   9  -8   1 948.390 182.792   0
  10   8   1 87.8934 93.9390   0
  10  -8   1-49.0092 86.0280   3
  10  -8   1 217.200 169.294   0
  10   8   1 127.413 91.4476   1
  11   8   1 595.919 202.887   0
  11  -8   1 735.702 223.005   0
  11  -8   1 315.128 120.664   3
  12   8   1 5245.60 413.414   0
  12  -8   1 4943.71 457.969   3
  12  -8   1 5344.25 393.769   0
  13  -8   1 1370.36 368.344   3
  13  -8   1 407.283 247.547   0
  13   8   1 585.746 252.041   0
  14  -8   1 673.226 255.829   0
  14  -8   1 1245.41 306.577   3
  14   8   1 708.035 228.798   0
  15  -8   1 155.197 178.127   0
  15   8   1 216.098 220.902   0
  15  -8   1 49.7644 211.499   3
  16   8   1-10.6735 149.595   0
  16  -8   1 25.3482 137.125   0
  16  -8   1-7.02563 145.862   3
  17  -9  -1 133.305 137.503   0
  16  -9  -1 311.031 205.477   3
  16   9  -1 253.492 221.858   0
  16  -9  -1 117.319 190.523   0
  15  -9  -1 334.878 228.938   0
  15   9  -1 556.386 299.502   0
  15  -9  -1 301.414 203.067   3
  14   9  -1 1631.30 358.921   0
  14  -9  -1 1764.29 361.872   0
  14  -9  -1 1412.04 276.292   3
  13   9  -1 299.440 175.180   0
  13  -9  -1 362.129 185.676   0
  13  -9  -1 242.162 241.056   3
  12  -9  -1 462.941 235.601   3
  12   9  -1 536.430 218.841   0
  12  -9  -1 811.426 213.506   0
  11  -9  -1 554.456 175.214   3
  11   9  -1 1225.03 218.330   1
  11  -9  -1 818.397 175.132   0
  11   9  -1 984.649 259.766   0
 -10  -9   1 886.785 165.466   2
  10  -9  -1 624.813 241.620   3
  10   9  -1 1181.78 258.735   0
  10  -9  -1 1041.64 203.753   0
  10   9  -1 1960.64 270.695   1
  -9  -9   1 5220.00 271.140   2
   9  -9  -1 5676.04 301.473   0
   9   9  -1 6486.36 384.864   0
   9  -9  -1 6468.94 440.377   3
   8  -9  -1 3210.47 303.335   3
   8   9  -1 3690.55 262.462   0
   8  -9  -1 3204.03 251.923   0
  -8  -9   1 2539.66 216.224   2
  -7  -9   1 544.815 98.4496   2
   7   9  -1 556.319 122.372   0
   7  -9  -1 275.105 80.7423   3
   7  -9  -1 857.757 164.921   0
   6   9  -1 1103.76 102.354   0
   6  -9  -1 1233.63 139.021   0
  -6  -9   1 1421.93 169.774   2
   6  -9  -1 1337.72 199.378   3
   5  -9  -1 28853.0 483.486   3
   5   9  -1 27004.0 327.231   0
   5  -9  -1 27303.2 303.847   0
  -5  -9   1 27783.0 391.933   2
   4  -9  -1 21746.3 239.538   0
  -4  -9   1 21531.1 345.466   2
   4   9  -1 21906.5 274.696   0
  -4  -9   1 19874.2 313.243   3
   4  -9  -1 22401.7 409.683   3
   3  -9  -1 9338.13 139.227   0
   3  -9  -1 8575.53 280.758   3
  -3  -9   1 8788.71 266.626   3
   3   9  -1 8739.87 167.230   0
  -3  -9   1 9322.65 270.625   2
  -2  -9   1 1698.04 158.473   3
  -2  -9   1 1622.79 169.932   2
   2  -9  -1 1667.79 199.468   3
   2   9  -1 1698.34 68.5920   0
   2  -9  -1 1882.36 206.931   2
   2  -9  -1 1839.79 55.7138   0
  -1  -9   1 15891.2 282.972   3
  -1  -9   1 15248.2 265.852   2
   1  -9  -1 15817.7 323.579   3
   1  -9  -1 15601.2 291.487   2
   0  -9   1 15499.8 350.526   2
   0  -9  -1 16148.9 289.103   2
   0  -9   1 16354.3 320.788   3
   0  -9  -1 15990.8 319.982   3
  -1  -9  -1 983.880 119.513   2
   1  -9   1 898.087 186.710   2
   1  -9   1 796.900 123.055   3
  -1  -9  -1 1223.05 199.345   3
   2  -9   1 9645.01 268.098   3
   2  -9   1 10064.1 310.648   2
  -2  -9  -1 9102.19 255.303   3
   2  -9   1 9186.94 112.749   0
   2   9   1 9632.66 141.187   0
  -2  -9  -1 9726.98 232.639   2
   3  -9   1 6248.43 222.867   3
  -3  -9  -1 7125.21 302.461   3
   3  -9   1 7244.60 154.260   0
   3   9   1 7552.05 166.777   0
  -3  -9  -1 7065.25 206.430   2
   3  -9   1 6815.47 321.778   2
   4  -9   1 15763.7 236.301   0
   4  -9   1 15579.5 401.842   2
   4  -9   1 16273.1 424.949   3
   4   9   1 14296.6 231.551   0
  -4  -9  -1 13376.1 244.872   2
   5  -9   1 4570.22 301.212   3
   5  -9   1 4447.88 205.735   0
   5   9   1 4019.29 175.839   0
  -5  -9  -1 4094.02 167.733   2
   6  -9   1 100.230 77.9779   3
   6   9   1 256.998 68.6540   0
   6  -9   1 532.432 150.557   0
  -6  -9  -1 380.212 106.835   2
   7  -9   1 471.195 178.008   3
  -7  -9  -1 511.794 103.992   2
   7   9   1 606.617 129.180   0
   7  -9   1 683.561 166.397   0
   7   9   1 1631.51 304.571   1
   8   9   1 2524.04 344.082   1
   8  -9   1 1456.40 267.766   3
   8   9   1 1590.32 250.657   0
  -8  -9  -1 1347.15 154.269   2
   8  -9   1 1573.39 211.504   0
   9  -9   1 242.493 131.266   0
   9   9   1 401.291 140.667   1
   9  -9   1 771.117 277.457   3
   9   9   1 331.942 217.260   0
  10   9   1 1810.41 239.464   0
  10  -9   1 2035.67 309.347   0
  10  -9   1 852.906 139.100   3
  10   9   1 1572.46 214.726   1
  11   9   1 189.834 156.779   0
  11   9   1 79.1842 114.117   1
  11  -9   1 51.3947 108.363   3
  11  -9   1 426.901 162.157   0
  12  -9   1 128.789 204.946   3
  12   9   1 248.373 190.368   0
  12  -9   1 125.491 117.526   0
  13  -9   1 185.677 162.980   0
  13   9   1 207.753 152.616   0
  13  -9   1 82.5508 126.778   3
  14   9   1 15.7341 126.303   0
  14  -9   1 49.4908 136.836   3
  14  -9   1 245.495 166.254   0
  15  -9   1 192.158 148.134   3
  15   9   1 132.503 176.770   0
  15  -9   1 195.363 214.420   0
  16  -9   1 66.0968 128.593   0
  16  -9   1 51.1764 148.603   3
  16   9   1 71.0367 143.217   0
  16 -10  -1 350.137 252.844   3
  16  10  -1 89.9012 129.095   0
  15  10  -1 182.816 237.446   0
  15 -10  -1 86.1666 211.091   3
  15 -10  -1 129.587 215.223   0
  14 -10  -1-8.33664 97.2891   0
  14  10  -1 125.451 184.613   0
  14 -10  -1 75.2589 183.338   3
  13 -10  -1 1063.60 271.276   0
  13  10  -1 1254.11 360.610   0
  13 -10  -1 1632.82 354.829   3
  12 -10  -1 5231.16 364.995   0
  12 -10  -1 4692.94 370.153   3
  12  10  -1 5141.65 385.358   0
  11 -10  -1 2426.44 285.296   0
  11  10  -1 2519.19 255.143   0
  11  10  -1 2555.18 263.495   1
  11 -10  -1 1932.30 261.390   3
  10  10  -1 3596.37 264.982   0
 -10 -10   1 4126.49 285.721   2
  10 -10  -1 3496.33 295.935   0
  10  10  -1 5431.83 331.718   1
  10 -10  -1 3001.13 285.744   3
   9 -10  -1 1717.59 265.481   3
   9 -10  -1 654.937 179.137   0
   9  10  -1 698.748 220.928   0
  -9 -10   1 1734.64 249.829   2
   8  10  -1 4563.20 279.058   0
  -8 -10   1 3879.00 245.674   2
   8 -10  -1 4821.42 351.160   3
   8 -10  -1 3972.70 255.789   0
   7  10  -1 825.238 230.178   0
   7 -10  -1 651.868 165.414   0
   7 -10  -1 135.215 103.071   3
  -7 -10   1 306.644 135.905   2
   6  10  -1 1705.25 215.832   0
   6 -10  -1 1339.89 179.348   0
  -6 -10   1 944.534 153.539   2
   6 -10  -1 703.097 173.829   3
   5 -10  -1 623.553 189.306   3
   5  10  -1 1422.60 173.036   0
  -5 -10   1 583.527 154.312   2
   5 -10  -1 987.411 122.814   0
   4 -10  -1 1991.74 249.819   3
   4  10  -1 1880.96 133.818   0
   4 -10  -1 1890.06 116.221   0
  -4 -10   1 1528.16 177.662   2
  -4 -10   1 1518.14 221.923   3
   3 -10  -1 21435.0 403.446   3
  -3 -10   1 23013.9 389.528   2
   3  10  -1 23668.5 215.254   0
  -3 -10   1 22515.8 400.533   3
   3 -10  -1 23196.0 176.171   0
  -2 -10   1 10880.7 290.684   3
  -2 -10   1 11658.0 314.400   2
   2 -10  -1 10849.7 317.517   2
   2  10  -1 10823.8 115.941   0
   2 -10  -1 10085.9 294.079   3
   1 -10  -1 49915.2 481.768   3
  -1 -10   1 48803.8 447.538   3
   1 -10  -1 49464.1 529.918   2
  -1 -10   1 46346.0 457.335   2
   0 -10  -1 45188.9 474.482   2
   0 -10  -1 45212.7 478.626   3
   0 -10   1 43019.2 469.791   3
   0 -10   1 41232.0 465.894   2
  -1 -10  -1 6506.34 307.883   2
   1 -10   1 4447.36 307.580   2
   1 -10   1 2911.96 201.871   3
  -1 -10  -1 5718.29 346.121   3
  -2 -10  -1 2772.10 194.807   2
   2  10   1 2328.53 90.4173   0
   2 -10   1 2537.64 219.898   2
  -2 -10  -1 2419.52 190.942   3
   2 -10   1 2044.13 193.219   3
   3 -10   1 7240.62 141.120   0
   3 -10   1 7408.65 270.831   3
  -3 -10  -1 6875.92 215.583   2
   3  10   1 6996.54 154.744   0
  -3 -10  -1 6293.63 264.752   3
   3 -10   1 7488.82 326.773   2
   4 -10   1 4217.27 290.108   3
  -4 -10  -1 3370.00 126.796   2
   4  10   1 4137.57 168.867   0
   4 -10   1 4189.77 152.689   0
   4 -10   1 3689.74 179.902   2
   5 -10   1 93.7389 129.409   3
   5  10   1-2.19150 41.7037   0
   5 -10   1 47.4230 62.5297   0
  -5 -10  -1 57.5986 95.8727   2
   6 -10   1 22.3972 83.7240   3
  -6 -10  -1 118.558 76.9019   2
   6  10   1 64.4023 63.8644   0
   6 -10   1 52.7609 61.1773   0
  -7 -10  -1 73.1158 72.2953   2
   7 -10   1 55.2964 62.1503   0
   7 -10   1 87.2064 129.381   3
   7  10   1 162.412 143.248   0
   7  10   1 774.197 221.204   1
   8 -10   1 19825.6 588.130   3
   8  10   1 20985.9 526.106   1
   8 -10   1 17874.8 441.019   0
   8  10   1 17903.4 476.715   0
   9  10   1 13689.9 481.528   1
   9  10   1 11607.5 445.041   0
   9 -10   1 12424.6 552.072   3
   9 -10   1 10598.8 383.501   0
  10  10   1 760.398 217.217   0
  10 -10   1 377.509 117.588   3
  10  10   1 979.217 259.774   1
  10 -10   1 547.331 179.957   0
  11 -10   1 1388.97 205.873   3
  11 -10   1 2255.32 280.483   0
  11  10   1 1476.17 190.494   1
  11  10   1 1984.47 283.829   0
  12 -10   1-6.73004 77.0076   0
  12 -10   1 39.5270 140.792   3
  12  10   1 49.5054 117.479   0
  13 -10   1 37.0394 130.537   0
  13  10   1 31.6465 120.654   0
  13 -10   1 106.777 178.616   3
  14 -10   1 9.33853 110.515   0
  14  10   1 32.2409 121.775   0
  14 -10   1 64.3602 177.241   3
  15 -10   1 152.449 235.980   0
  15  10   1 25.3993 126.270   0
  15 -10   1 182.689 215.123   3
  16  10   1 144.383 198.286   0
  16  11  -1 417.265 293.530   0
  15  11  -1 210.845 182.503   0
  15 -11  -1 73.6299 172.220   3
  14  11  -1 579.434 277.626   0
  14 -11  -1 509.353 180.373   3
  13  11  -1 1223.15 270.899   0
  13 -11  -1 1273.19 316.260   3
  12 -11  -1 126.185 119.825   0
  12 -11  -1 112.992 133.862   3
  12  11  -1 72.6629 118.890   0
  11 -11  -1 449.289 174.954   0
  11 -11  -1 253.019 162.394   3
  11  11  -1 803.681 206.831   1
  11  11  -1 297.732 157.972   0
  10  11  -1 3270.83 303.041   0
  10 -11  -1 3215.43 271.711   0
  10 -11  -1 4700.62 464.951   3
   9 -11  -1 30920.3 610.257   3
   9 -11  -1 27821.3 530.288   0
   9  11  -1 28112.0 579.544   0
  -9 -11   1 27759.5 463.364   2
  -8 -11   1 3851.72 252.460   2
   8 -11  -1 2659.71 301.262   3
   8  11  -1 3686.88 282.359   0
   8 -11  -1 2776.08 195.781   0
   7 -11  -1 2333.49 194.900   0
   7  11  -1 2579.69 194.344   0
  -7 -11   1 2265.23 249.794   2
   7 -11  -1 2146.24 278.943   3
  -6 -11   1 289.091 142.256   2
   6 -11  -1 90.1252 162.114   3
   6 -11  -1 252.720 112.176   0
   6  11  -1 267.131 119.662   0
   5 -11  -1 4706.15 175.357   0
  -5 -11   1 4230.63 252.228   2
   5  11  -1 4742.52 196.515   0
  -5 -11   1 4404.16 260.287   3
   5 -11  -1 4833.10 354.151   3
  -4 -11   1 13559.8 362.209   2
   4 -11  -1 15076.4 427.678   3
  -4 -11   1 12815.0 366.134   3
   4  11  -1 13884.7 241.101   0
   3 -11  -1 1542.11 143.949   2
   3 -11  -1 1731.20 143.679   3
  -3 -11   1 1230.62 119.520   2
  -3 -11   1 2215.62 248.954   3
   3  11  -1 2323.79 105.535   0
   2  11  -1 5923.56 74.8036   0
   2 -11  -1 6371.58 292.499   3
  -2 -11   1 5422.97 223.684   2
   2 -11  -1 5844.92 231.779   2
  -2 -11   1 7965.04 311.111   3
  -1 -11   1 2394.86 317.291   2
   1 -11  -1 2403.75 289.986   3
  -1 -11   1 1865.06 290.694   3
   1 -11  -1 434.747 130.489   2
   0 -11   1 66136.5 617.404   3
   0 -11  -1 68616.1 635.985   3
   0 -11   1 67389.7 673.134   2
   0 -11  -1 62299.9 603.999   2
   1 -11   1 45377.9 523.719   3
  -1 -11  -1 58468.4 558.225   2
  -1 -11  -1 56021.6 621.514   3
   1 -11   1 50468.4 557.435   2
  -2 -11  -1 27280.0 424.182   2
   2 -11   1 21127.2 409.890   3
   2 -11   1 23767.2 469.717   2
  -2 -11  -1 24535.6 507.286   3
   2  11   1 21513.8 169.150   0
  -3 -11  -1 3354.71 179.835   2
   3 -11   1 3902.54 271.502   3
   3  11   1 3821.02 141.742   0
  -3 -11  -1 2952.87 260.895   3
   3 -11   1 3476.69 268.529   2
   4  11   1 840.610 115.450   0
  -4 -11  -1 486.718 92.1243   2
   4 -11   1 368.992 120.616   3
   4 -11   1 736.167 91.0639   0
  -4 -11  -1 302.595 92.0585   3
   4 -11   1 597.307 155.618   2
   5 -11   1 2677.01 130.575   0
   5  11   1 3084.35 185.228   0
   5 -11   1 3101.61 293.001   3
  -5 -11  -1 3245.48 200.008   2
   6 -11   1 3680.09 183.764   0
  -6 -11  -1 3379.49 205.747   2
   6 -11   1 3810.93 327.812   3
   6  11   1 3458.11 212.365   0
   7 -11   1 14248.7 331.931   0
   7 -11   1 16940.2 512.235   3
   7  11   1 18399.2 462.138   1
   7  11   1 14786.0 426.090   0
   8  11   1 7686.10 415.151   0
   8 -11   1 10841.8 484.103   3
   8 -11   1 6855.12 296.114   0
   8  11   1 10066.0 395.456   1
   9 -11   1 7045.47 361.120   0
   9 -11   1 10849.5 571.530   3
   9  11   1 10976.1 496.439   1
   9  11   1 7308.64 362.856   0
  10 -11   1 9983.80 390.021   0
  10 -11   1 8816.29 562.687   3
  10  11   1 9336.38 439.311   1
  10  11   1 9912.69 455.563   0
  11  11   1 177.294 104.100   1
  11 -11   1 87.3369 118.860   0
  11 -11   1 207.551 187.654   3
  11  11   1 211.584 129.862   0
  12  11   1 597.836 159.698   0
  12 -11   1 717.852 265.981   3
  13 -11   1 130.599 161.871   3
  13  11   1 16.2873 134.306   0
  14 -11   1 262.707 192.792   3
  14  11   1 13.5279 93.8605   0
  15  11   1 277.457 192.560   0
  15 -11   1 153.745 216.807   3
  15  12  -1 601.149 213.089   0
  15 -12  -1 403.072 291.438   3
  14 -12  -1 91.7847 189.250   3
  14  12  -1 112.856 164.287   0
  13  12  -1 440.158 232.428   0
  13 -12  -1 614.264 324.245   3
  12 -12  -1 1132.84 296.943   3
  12  12  -1 986.172 257.292   0
  11 -12  -1 3308.10 344.187   3
  11  12  -1 3314.49 292.917   0
  11  12  -1 4076.17 341.862   1
  10  12  -1 10510.7 458.129   0
  10 -12  -1 12123.6 533.098   3
  -9 -12   1 557.384 201.179   2
   9 -12  -1 334.042 161.623   3
   9  12  -1 63.4309 116.804   0
   8  12  -1 16624.5 429.882   0
  -8 -12   1 17411.1 407.813   2
   8 -12  -1 21064.8 556.762   3
   7  12  -1 3009.52 203.658   0
  -7 -12   1 2869.65 198.451   2
   7 -12  -1 3052.47 290.941   3
   6  12  -1 2465.23 199.766   0
  -6 -12   1 2219.45 184.126   2
  -6 -12   1 3143.39 352.197   3
   6 -12  -1 2558.50 285.744   3
  -5 -12   1 1395.62 281.528   3
   5 -12  -1 1719.77 326.289   3
  -5 -12   1 1000.81 156.497   2
  -4 -12   1 4661.56 243.488   3
   4 -12  -1 5796.31 305.647   3
  -4 -12   1 5032.77 278.862   2
  -3 -12   1 9988.59 386.120   3
   3 -12  -1 7948.20 272.419   3
   3 -12  -1 7999.09 305.808   2
  -3 -12   1 8334.96 269.301   2
   2 -12  -1 26667.3 469.760   2
  -2 -12   1 31419.2 450.367   3
  -2 -12   1 29874.6 521.655   2
   2 -12  -1 24967.1 442.254   3
  -1 -12   1 95930.9 741.337   2
  -1 -12   1 99496.2 762.945   3
   1 -12  -1 105099. 840.065   3
   1 -12  -1 95292.0 799.845   2
   0 -12   1 62874.4 703.306   2
   0 -12  -1 64254.6 679.878   3
   0 -12  -1 55686.1 601.460   2
   0 -12   1 47410.7 542.644   3
  -1 -12  -1 19809.3 417.859   2
  -1 -12  -1 20708.2 512.775   3
   1 -12   1 10084.0 325.676   3
   1 -12   1 14999.6 425.903   2
  -2 -12  -1 11788.1 347.887   2
   2 -12   1 9174.25 383.712   2
   2 -12   1 7822.24 297.657   3
  -2 -12  -1 10532.4 415.385   3
   3 -12   1 12659.5 437.526   3
  -3 -12  -1 12978.8 345.252   2
   3 -12   1 13195.2 454.610   2
  -3 -12  -1 12473.8 410.685   3
   4 -12   1 1238.77 153.040   3
  -4 -12  -1 1351.88 162.644   2
  -4 -12  -1 1080.18 198.298   3
   4 -12   1 1561.54 267.175   2
  -5 -12  -1-13.3348 49.5834   2
   5 -12   1 143.111 110.109   3
  -5 -12  -1 89.3349 95.1746   3
   5  12   1 26.7829 51.0252   0
  -6 -12  -1 37.7005 61.3841   2
   6  12   1 147.445 84.5321   0
   6 -12   1 536.975 281.157   3
   7  12   1 1979.16 164.416   0
   7 -12   1 3311.89 358.674   3
   7  12   1 4581.84 356.418   1
   8 -12   1 32203.1 659.009   3
   8  12   1 35067.3 702.457   1
   8  12   1 26368.7 518.568   0
   9  12   1 30489.0 634.518   1
   9 -12   1 30150.8 715.811   3
   9  12   1 23514.1 545.541   0
  10  12   1 264.351 122.929   0
  10 -12   1 60.8542 138.299   3
  10  12   1 389.056 201.148   1
  11  12   1 472.973 121.998   0
  11  12   1 598.975 174.633   1
  11 -12   1 811.627 252.453   3
  12 -12   1 143.359 128.694   3
  12  12   1 150.317 143.561   0
  13 -12   1 252.812 213.684   3
  13  12   1 169.732 147.673   0
  14 -12   1 113.878 173.956   3
  14  12   1 23.7958 155.439   0
  15  12   1 568.219 253.041   0
  14 -13  -1 173.605 178.841   3
  13 -13  -1 185.506 192.381   3
  12 -13  -1 188.303 212.927   3
  11  13  -1 511.789 242.285   1
  11 -13  -1 176.362 158.064   3
  10 -13  -1 6705.06 431.909   3
   9 -13  -1 27781.3 644.707   3
   8 -13  -1 7446.16 395.942   3
  -8 -13   1 5455.75 334.519   2
  -7 -13   1 280.531 129.084   2
   7 -13  -1 876.404 246.060   3
  -7 -13   1 821.312 235.685   3
  -6 -13   1 620.934 133.658   2
   6 -13  -1 545.210 158.557   3
  -6 -13   1 880.814 198.311   3
  -5 -13   1 28.5640 74.4614   2
   5 -13  -1 115.587 136.561   3
  -5 -13   1 42.3148 82.5981   3
  -4 -13   1 1563.64 287.319   3
  -4 -13   1 1262.88 196.944   2
   4 -13  -1 2178.92 253.503   3
   3 -13  -1 74.4814 104.694   2
  -3 -13   1 268.878 154.044   3
   3 -13  -1-25.9672 66.2585   3
  -3 -13   1 7.66517 75.7930   2
  -2 -13   1 2527.58 273.474   2
   2 -13  -1 1537.73 141.412   2
   2 -13  -1 1660.08 170.666   3
  -2 -13   1 1509.03 159.927   3
   1 -13  -1 656.923 218.194   2
   1 -13  -1 1363.27 280.610   3
  -1 -13   1 5969.10 346.894   2
  -1 -13   1 4663.11 423.709   3
   0 -13  -1 85251.1 798.725   3
   0 -13   1 92173.3 819.187   2
   0 -13   1 73285.7 686.082   3
   0 -13  -1 78174.1 751.750   2
   1 -13   1 30057.1 580.337   2
   1 -13   1 20970.3 372.157   3
  -1 -13  -1 36993.5 531.365   2
  -1 -13  -1 28536.2 517.672   3
  -2 -13  -1 3769.01 307.914   3
   2 -13   1 1260.67 185.795   3
   2 -13   1 2562.23 302.043   2
  -2 -13  -1 4666.00 270.763   2
   3 -13   1 286.539 144.619   3
  -3 -13  -1 400.468 186.546   3
  -3 -13  -1 635.030 174.406   2
   3 -13   1 462.913 203.110   2
  -4 -13  -1 2586.16 212.674   2
  -4 -13  -1 2615.59 314.141   3
   4 -13   1 2436.15 301.377   2
   4 -13   1 2228.56 243.936   3
  -5 -13  -1 241.931 148.200   3
  -5 -13  -1 102.586 78.9690   2
   5 -13   1 366.864 223.874   3
  -6 -13  -1 481.888 205.057   3
   6 -13   1 368.899 229.316   3
   7  13   1 8883.17 477.941   1
   7 -13   1 6571.43 349.095   3
   8  13   1 6737.67 447.027   1
   8 -13   1 7400.05 603.558   3
   9  13   1 5511.27 396.622   1
   9 -13   1 5133.20 377.713   3
  10  13   1 4746.15 435.493   1
  10 -13   1 4689.07 431.383   3
  11 -13   1 85.2422 117.211   3
  11  13   1 84.5038 118.695   1
  12 -13   1 240.523 181.018   3
  13 -13   1 198.761 193.294   3
  14 -13   1 151.820 175.206   3
  14 -14  -1 55.9359 174.749   3
  13 -14  -1 442.139 234.190   3
  12 -14  -1 148.009 134.312   3
  11 -14  -1 799.331 263.439   3
  11  14  -1 1286.96 269.906   1
  10 -14  -1 2917.14 360.635   3
  -9 -14   1 2345.84 349.012   3
   9 -14  -1 1575.34 286.649   3
  -8 -14   1 1449.66 300.777   3
   8 -14  -1 2021.04 312.671   3
   7 -14  -1 1009.70 255.981   3
  -7 -14   1 549.557 119.203   2
  -7 -14   1 814.309 186.998   3
  -6 -14   1 335.072 188.738   3
   6 -14  -1 106.671 113.534   3
  -6 -14   1 167.916 86.6329   2
   5 -14  -1 129.251 100.833   3
  -5 -14   1 120.649 99.5199   3
  -5 -14   1 47.0961 81.3341   2
   4 -14  -1 1400.28 271.503   3
  -4 -14   1 996.545 169.407   2
  -4 -14   1 1079.09 219.137   3
  -3 -14   1 2525.89 259.421   3
  -3 -14   1 2509.69 239.726   2
   3 -14  -1 2360.49 201.990   3
   2 -14  -1 1151.70 180.516   3
   2 -14  -1 1163.09 203.209   2
  -2 -14   1 2373.16 298.922   2
  -2 -14   1 2088.75 268.595   3
  -1 -14   1 26398.1 576.169   3
   1 -14  -1 25637.0 619.077   3
  -1 -14   1 27279.9 586.342   2
   1 -14  -1 20591.7 504.101   2
   0 -14  -1 25362.0 484.203   2
   0 -14   1 28097.7 526.530   2
   0 -14   1 29779.1 588.241   3
   0 -14  -1 34726.9 627.191   3
   1 -14   1-24.9927 68.6233   3
  -1 -14  -1 307.888 144.935   2
   1 -14   1 313.516 236.749   2
  -1 -14  -1 848.540 257.556   3
   2 -14   1 184.878 156.531   2
   2 -14   1 60.2987 84.0146   3
  -2 -14  -1 275.448 182.127   3
  -2 -14  -1 534.797 179.501   2
   3 -14   1 1838.99 240.169   3
   3 -14   1 2165.89 314.618   2
  -3 -14  -1 2179.42 219.897   2
  -3 -14  -1 2018.92 286.720   3
   4 -14   1 944.061 243.980   2
  -4 -14  -1 1225.62 248.674   3
  -4 -14  -1 1198.27 212.031   2
   4 -14   1 1092.39 231.860   3
  -5 -14  -1 973.410 152.020   2
  -5 -14  -1 1247.77 254.176   3
   5 -14   1 1031.23 194.666   3
   6 -14   1 169.763 105.327   3
  -6 -14  -1 467.236 204.681   3
  -7 -14  -1 67.8439 117.132   3
   7 -14   1 60.3624 107.237   3
   7  14   1 218.254 171.527   1
   8  14   1 6384.15 489.594   1
   8 -14   1 5680.95 486.408   3
   9  14   1 5537.85 457.771   1
   9 -14   1 5019.69 519.461   3
  10  14   1 90.8492 135.289   1
  10 -14   1 75.7056 184.678   3
  11  14   1 85.7535 139.068   1
  11 -14   1 8.76880 135.390   3
  12 -14   1 727.092 268.567   3
  13 -14   1 183.330 174.178   3
  13 -15  -1 129.099 191.665   3
  12 -15  -1 63.4644 113.288   3
  11 -15  -1 161.433 181.176   3
  11  15  -1 101.688 157.705   1
 -10 -15   1 4.84249 111.428   3
  10 -15  -1 42.9432 116.752   3
   9 -15  -1 415.851 219.316   3
  -9 -15   1 347.264 190.326   3
   8 -15  -1 4370.34 414.058   3
  -8 -15   1 3859.16 332.411   3
  -7 -15   1 527.658 113.790   2
  -7 -15   1 522.396 145.814   3
   7 -15  -1 917.999 187.673   3
   6 -15  -1 1136.11 211.409   3
  -6 -15   1 1338.63 267.164   3
  -6 -15   1 1092.54 140.308   2
   5 -15  -1 5961.64 412.507   3
  -5 -15   1 5723.24 372.487   3
  -5 -15   1 5388.65 308.774   2
  -4 -15   1 101.300 92.5001   3
  -4 -15   1 93.5453 103.784   2
   4 -15  -1 88.6200 137.483   3
  -3 -15   1 82.1945 90.9770   2
  -3 -15   1 83.9620 93.0235   3
   3 -15  -1 5.28756 84.4356   3
   2 -15  -1 698.395 160.453   2
  -2 -15   1 708.871 212.805   2
   2 -15  -1 692.071 200.875   3
  -2 -15   1 389.028 127.663   3
   1 -15  -1 1994.60 254.044   3
  -1 -15   1 2110.09 279.887   3
   1 -15  -1 2636.77 336.199   2
  -1 -15   1 2908.46 346.767   2
   0 -15  -1 184.559 135.459   2
   0 -15   1 298.671 203.284   3
   0 -15  -1 134.653 171.805   3
   0 -15   1 336.883 207.096   2
   1 -15   1 6002.98 373.213   2
  -1 -15  -1 6152.80 346.974   2
  -1 -15  -1 6274.37 369.938   3
   1 -15   1 5865.14 331.996   3
  -2 -15  -1 204.575 157.810   3
   2 -15   1 37.5038 98.9363   2
   2 -15   1 59.5841 124.358   3
  -2 -15  -1 87.0794 108.312   2
  -3 -15  -1 177.113 155.601   3
  -3 -15  -1 378.700 164.076   2
   3 -15   1 132.336 122.417   2
   3 -15   1 258.979 157.276   3
  -4 -15  -1 7904.44 357.321   2
   4 -15   1 8365.09 479.888   2
  -4 -15  -1 7125.45 386.509   3
   4 -15   1 8300.45 451.936   3
  -5 -15  -1 71.6379 100.030   3
   5 -15   1 140.556 132.964   3
   6 -15   1-39.1239 85.8367   3
  -6 -15  -1 111.656 124.594   3
   7 -15   1 490.240 125.083   3
  -7 -15  -1 803.352 168.021   3
   7  15   1 2295.04 397.876   1
   8  15   1 1323.38 435.800   1
  -8 -15  -1 198.911 128.337   3
   8 -15   1 280.815 145.819   3
   9  15   1 186.225 216.507   1
  -9 -15  -1-44.4000 93.1524   3
   9 -15   1 116.471 187.216   3
  10  15   1 468.693 210.570   1
  10 -15   1 201.312 169.583   3
  11  15   1 116.693 111.198   1
  11 -15   1 95.2833 130.456   3
  12 -15   1 59.8575 135.948   3
  13 -15   1 156.829 169.380   3
  13 -16  -1 116.985 184.234   3
 -13 -16   1 276.127 192.729   3
 -12 -16   1 164.380 174.846   3
  12 -16  -1 74.3252 164.933   3
  11 -16  -1 99.0030 157.269   3
 -11 -16   1 31.8111 138.608   3
  11  16  -1 206.666 169.613   1
  10 -16  -1 883.732 314.880   3
 -10 -16   1 353.235 179.255   3
  10  16  -1 704.126 219.721   1
  -9 -16   1 2334.70 316.736   3
   9 -16  -1 709.326 225.521   3
  -8 -16   1 113.642 121.884   3
   8 -16  -1 161.169 124.345   3
   7 -16  -1 143.983 169.337   3
  -7 -16   1 93.8303 105.588   3
   6 -16  -1 259.802 133.970   3
  -6 -16   1 357.376 184.626   3
  -6 -16   1 42.1134 93.1662   2
  -5 -16   1 6030.02 394.319   3
   5 -16  -1 7234.65 484.931   3
  -5 -16   1 6078.39 367.332   2
  -4 -16   1 7116.30 393.115   3
  -4 -16   1 7805.38 414.734   2
   4 -16  -1 8018.77 472.325   3
  -3 -16   1 280.306 157.895   3
  -3 -16   1 233.487 182.732   2
   3 -16  -1 142.156 107.053   3
   2 -16  -1-13.9748 78.3233   3
   2 -16  -1 111.115 117.574   2
  -2 -16   1 96.6344 156.206   2
  -2 -16   1 72.4904 103.423   3
  -1 -16   1 109.035 111.123   3
  -1 -16   1 541.745 263.840   2
   1 -16  -1-20.3631 94.2795   3
   1 -16  -1 364.225 198.776   2
   0 -16  -1 4439.65 339.512   2
   0 -16   1 4543.63 373.436   3
   0 -16  -1 4411.11 352.211   3
   0 -16   1 4544.02 318.275   2
   1 -16   1 2449.56 261.798   2
   1 -16   1 2895.38 308.794   3
  -1 -16  -1 3672.24 366.058   3
  -1 -16  -1 2965.23 307.042   2
  -2 -16  -1 175.887 119.969   2
   2 -16   1 151.234 131.419   2
  -2 -16  -1 847.469 283.076   3
   2 -16   1 476.321 208.239   3
  -3 -16  -1 2209.66 334.963   3
   3 -16   1 2915.37 353.646   3
   3 -16   1 2040.11 287.412   2
  -3 -16  -1 2074.94 249.269   2
   4 -16   1 1607.88 278.626   3
  -4 -16  -1 1366.74 265.363   3
   4 -16   1 2093.28 367.041   2
  -4 -16  -1 1522.48 247.715   2
  -5 -16  -1 7487.54 433.419   3
   5 -16   1 7434.68 431.725   3
  -6 -16  -1-4.56181 98.7732   3
   6 -16   1-44.5212 78.2879   3
   7  16   1 2232.39 339.922   1
  -7 -16  -1 1145.94 176.200   3
   7 -16   1 401.793 150.299   3
  -8 -16  -1-44.2226 94.6530   3
   8 -16   1 13.9654 120.885   3
   8  16   1 165.638 164.285   1
   9 -16   1 110.493 140.200   3
  -9 -16  -1 35.9666 114.246   3
   9  16   1 170.923 201.180   1
 -10 -16  -1 102.644 128.657   3
  10  16   1 167.731 142.743   1
  10 -16   1 104.245 192.975   3
 -11 -16  -1 348.051 163.191   3
  11 -16   1 134.004 172.462   3
  11  16   1 189.314 153.930   1
  12 -16   1 297.402 252.444   3
  12 -17  -1 138.516 179.575   3
 -12 -17   1 289.338 252.082   3
  11  17  -1 704.377 275.271   1
 -11 -17   1 359.853 207.343   3
  11 -17  -1 217.669 215.961   3
  10  17  -1 1744.85 316.614   1
  10 -17  -1 806.464 302.213   3
 -10 -17   1 599.455 198.818   3
  -9 -17   1 115.337 136.640   3
   9 -17  -1 181.036 181.026   3
   8 -17  -1 1669.05 252.203   3
  -8 -17   1 2166.10 331.761   3
   7 -17  -1 882.377 217.934   3
  -7 -17   1 1124.76 246.320   3
  -6 -17   1 7145.51 420.834   3
   6 -17  -1 6595.39 473.721   3
  -6 -17   1 4025.71 285.659   2
  -5 -17   1 5848.93 397.619   2
  -5 -17   1 6831.84 381.204   3
   5 -17  -1 9117.88 519.397   3
  -4 -17   1 365.188 140.343   3
  -4 -17   1 203.831 141.947   2
   4 -17  -1 393.152 192.926   3
   3 -17  -1 818.999 221.454   3
  -3 -17   1 836.806 266.824   3
  -3 -17   1 636.607 212.433   2
   2 -17  -1 1353.09 264.426   3
   2 -17  -1 2026.49 278.571   2
  -2 -17   1 1634.19 244.964   3
  -2 -17   1 1814.44 307.621   2
   1 -17  -1 5745.70 359.758   2
  -1 -17   1 6210.73 451.914   3
   1 -17  -1 5909.85 418.341   3
  -1 -17   1 6137.23 390.849   2
   0 -17   1 897.435 221.216   3
   0 -17   1 799.132 256.812   2
   0 -17  -1 1454.95 296.303   2
   0 -17  -1 906.292 239.134   3
   1 -17   1 340.495 132.507   2
  -1 -17  -1 554.434 196.747   2
  -1 -17  -1 543.612 197.720   3
   1 -17   1 699.003 252.620   3
  -2 -17  -1 465.673 240.315   3
  -2 -17  -1 146.481 101.107   2
   2 -17   1 122.713 98.6402   3
   2 -17   1 86.5330 118.094   2
   3 -17   1 7121.01 475.062   2
  -3 -17  -1 5816.55 351.623   2
   3 -17   1 7168.48 426.050   3
  -3 -17  -1 6600.65 465.732   3
   4 -17   1 22275.1 677.237   3
   4 -17   1 25353.6 715.434   2
  -4 -17  -1 19902.1 610.669   3
  -5 -17  -1 1254.01 257.194   3
   5 -17   1 702.855 275.479   3
  -6 -17  -1 2156.28 317.311   3
   6 -17   1 1740.52 239.762   3
   7 -17   1 35.7235 98.4627   3
  -7 -17  -1 56.8365 149.959   3
   7  17   1 228.476 255.629   1
  -8 -17  -1 704.607 211.267   3
   8  17   1 961.037 338.277   1
   8 -17   1 474.132 199.990   3
   9  17   1 1129.59 348.966   1
   9 -17   1 318.806 182.913   3
  -9 -17  -1 506.594 261.055   3
  10 -17   1 94.5102 172.583   3
  10  17   1 884.021 377.217   1
 -10 -17  -1 270.050 207.519   3
  11 -17   1 167.494 222.458   3
 -11 -17  -1 93.3532 136.776   3
  11  17   1 241.033 199.723   1
 -12 -17  -1 360.535 232.152   3
  11  18  -1 203.205 190.683   1
 -11 -18   1 299.060 261.693   3
  11 -18  -1 157.118 157.773   3
  10  18  -1 438.669 286.806   1
 -10 -18   1 165.707 169.518   3
  10 -18  -1 109.372 178.873   3
  -9 -18   1 69.7077 136.793   3
   9 -18  -1 52.3152 145.037   3
   8 -18  -1 38.7149 122.990   3
  -8 -18   1 105.762 146.964   3
  -7 -18   1-21.6703 108.521   3
   7 -18  -1 55.3324 147.485   3
  -6 -18   1 198.242 149.891   3
   6 -18  -1 106.099 179.877   3
  -5 -18   1 12052.7 458.271   3
   5 -18  -1 11983.2 497.219   3
  -5 -18   1 10598.6 454.360   2
  -4 -18   1 14897.5 509.842   2
   4 -18  -1 18028.6 635.640   3
  -4 -18   1 15400.8 430.676   3
  -3 -18   1 1557.32 302.680   3
  -3 -18   1 834.374 220.860   2
   3 -18  -1 320.095 136.286   3
  -2 -18   1 117.666 96.4020   3
  -2 -18   1 289.944 197.595   2
   2 -18  -1 420.448 178.015   2
   2 -18  -1 315.605 224.719   3
  -1 -18   1 250.027 191.973   3
   1 -18  -1 312.218 185.466   2
  -1 -18   1 236.757 177.104   2
   1 -18  -1 184.045 149.877   3
   0 -18   1 1295.69 250.708   2
   0 -18  -1 1363.80 254.345   2
   0 -18   1 1100.60 177.940   3
   0 -18  -1 1754.03 298.628   3
  -1 -18  -1 85.4617 103.467   3
  -1 -18  -1-1.52217 106.891   2
   1 -18   1 156.343 116.826   3
   1 -18   1 118.827 122.912   2
   2 -18   1 1035.65 269.379   2
  -2 -18  -1 857.835 276.853   3
  -2 -18  -1 449.746 142.191   2
   2 -18   1 532.626 212.612   3
   3 -18   1 5266.30 472.300   2
   3 -18   1 2456.86 334.200   3
  -3 -18  -1 3820.27 326.592   3
   4 -18   1 2265.96 398.689   3
  -4 -18  -1 1363.93 294.566   3
  -5 -18  -1 18207.3 652.623   3
   5 -18   1 13588.3 569.145   3
   6 -18   1 33.1069 117.742   3
  -6 -18  -1 242.156 243.233   3
  -7 -18  -1 29.7542 107.373   3
   7  18   1 123.547 183.213   1
   7 -18   1 45.4450 132.064   3
  -8 -18  -1 142.694 142.311   3
   8  18   1 164.074 213.854   1
   8 -18   1-45.0278 144.723   3
   9  18   1 91.2082 197.518   1
  -9 -18  -1 50.5037 159.993   3
   9 -18   1 195.197 278.127   3
 -10 -18  -1 55.4330 125.274   3
  10  18   1 216.764 196.996   1
  10 -18   1 169.561 202.034   3
 -11 -18  -1 82.6489 161.080   3
  11 -18   1 113.707 149.202   3
  11  18   1 65.5887 185.129   1
 -12 -18  -1 1843.58 316.806   3
  11  19  -1 535.717 341.546   1
 -10 -19   1 158.529 181.047   3
  10  19  -1 148.912 136.419   1
  10 -19  -1 64.3567 118.785   3
   9 -19  -1-25.4225 91.8186   3
  -9 -19   1 59.6478 136.822   3
   8 -19  -1 2.91556 101.313   3
  -8 -19   1 209.285 165.167   3
  -7 -19   1 521.821 223.071   3
   7 -19  -1 385.459 206.901   3
  -6 -19   1 4415.82 408.748   3
   6 -19  -1 3256.82 442.910   3
   5 -19  -1 6363.59 452.387   3
  -5 -19   1 7730.82 406.366   3
   4 -19  -1 398.131 245.406   3
  -4 -19   1 122.164 169.687   2
  -4 -19   1 501.421 188.561   3
  -3 -19   1 3189.03 383.803   2
   3 -19  -1 1928.97 288.253   3
  -3 -19   1 3387.34 396.973   3
  -2 -19   1 111.493 125.047   3
  -2 -19   1 88.4402 153.289   2
   2 -19  -1 111.169 151.010   3
  -1 -19   1 592.090 173.870   3
  -1 -19   1 424.447 186.808   2
   1 -19  -1 582.436 239.631   2
   1 -19  -1 673.114 224.112   3
   0 -19  -1 849.908 265.009   2
   0 -19  -1 425.945 202.296   3
   0 -19   1 634.549 192.109   2
   0 -19   1 375.833 165.119   3
   1 -19   1 22.1419 124.089   3
  -1 -19  -1 89.2520 119.219   2
   1 -19   1 145.653 131.910   2
  -1 -19  -1 62.8535 111.762   3
  -2 -19  -1 104.993 110.599   3
   2 -19   1 38.1158 89.5358   3
  -2 -19  -1-20.8575 78.0787   2
   2 -19   1 213.155 164.924   2
   3 -19   1 5802.85 389.181   2
   3 -19   1 3836.31 413.743   3
  -3 -19  -1 5278.57 391.800   3
   4 -19   1 11924.7 561.047   3
  -4 -19  -1 14644.7 543.901   3
  -5 -19  -1 674.361 221.606   3
   5 -19   1 531.856 277.424   3
   6 -19   1 105.672 156.441   3
  -6 -19  -1 43.1769 105.756   3
   6  19   1 323.183 213.410   1
   7  19   1 219.350 233.441   1
   7 -19   1 135.578 176.396   3
  -7 -19  -1 211.271 173.708   3
  -8 -19  -1 493.845 262.858   3
   8 -19   1 223.276 183.514   3
   8  19   1 924.828 345.377   1
  -9 -19  -1 48.8574 134.503   3
   9 -19   1 35.5911 143.940   3
   9  19   1 272.252 183.507   1
 -10 -19  -1 59.4239 173.214   3
  10 -19   1 63.7829 153.450   3
  10  19   1 243.427 209.369   1
  11  19   1 131.711 139.221   1
 -11 -19  -1 106.709 185.111   3
  10  20  -1 346.252 156.581   1
 -10 -20   1 180.132 199.199   3
   9 -20  -1-13.6023 112.592   3
  -9 -20   1 219.615 170.365   3
   8 -20  -1 101.156 206.436   3
  -8 -20   1 112.319 168.200   3
  -7 -20   1 83.1305 155.278   3
   7 -20  -1 222.937 203.729   3
  -6 -20   1 176.110 193.154   3
   6 -20  -1 196.446 224.519   3
  -5 -20   1 290.868 162.053   3
   5 -20  -1 439.343 208.346   3
  -4 -20   1 5177.34 419.462   3
   4 -20  -1 4783.12 423.405   3
  -3 -20   1 1244.64 257.404   3
   3 -20  -1 1352.31 309.465   3
  -3 -20   1 1217.54 262.603   2
   2 -20  -1 78.3457 173.784   3
  -2 -20   1 69.6525 128.742   2
  -2 -20   1 4.13638 92.5571   3
   1 -20  -1 1252.62 218.273   2
   1 -20  -1 1357.36 338.558   3
  -1 -20   1 834.942 280.076   2
  -1 -20   1 503.193 176.530   3
   0 -20  -1 2412.37 351.607   3
   0 -20  -1 2717.86 371.335   2
   0 -20   1 1639.64 266.336   3
   0 -20   1 2157.26 293.519   2
   1 -20   1 80.5327 249.178   2
  -1 -20  -1 135.390 150.280   2
  -1 -20  -1 85.6812 119.982   3
   1 -20   1 44.0309 101.152   3
   2 -20   1 1978.13 343.466   2
   2 -20   1 1072.50 295.891   3
  -2 -20  -1 1402.85 284.130   3
  -3 -20  -1 2863.85 352.435   3
   3 -20   1 2482.58 368.192   3
   3 -20   1 2938.64 344.427   2
  -4 -20  -1 378.108 234.064   3
   4 -20   1 112.332 166.347   3
  -5 -20  -1 468.170 205.028   3
   5 -20   1 714.488 311.605   3
   6  20   1 507.651 220.761   1
   6 -20   1 593.076 329.911   3
  -6 -20  -1 648.152 268.291   3
   7 -20   1 84.9014 125.414   3
  -7 -20  -1 110.693 168.273   3
   7  20   1 275.919 194.759   1
  -8 -20  -1 87.1987 119.872   3
   8 -20   1-64.8446 124.838   3
   8  20   1 158.998 203.456   1
  -9 -20  -1 758.968 281.630   3
   9  20   1 344.286 228.396   1
   9 -20   1 333.727 208.618   3
 -10 -20  -1 86.6059 181.770   3
  10  20   1 185.672 206.509   1
  -9 -21   1 602.417 302.238   3
  -8 -21   1 45.4602 145.738   3
   8 -21  -1 94.5847 204.265   3
   7 -21  -1 89.8794 116.248   3
  -7 -21   1 213.891 188.391   3
   6 -21  -1 96.9643 148.978   3
  -6 -21   1 145.991 195.777   3
  -5 -21   1 671.661 283.157   3
   5 -21  -1 358.429 284.153   3
  -4 -21   1 455.682 235.737   3
   4 -21  -1 604.389 296.110   3
  -3 -21   1 118.267 182.428   2
   3 -21  -1 302.811 209.718   3
  -3 -21   1 265.142 197.445   3
  -2 -21   1 77.6592 131.202   2
   2 -21  -1 40.0909 148.960   3
  -2 -21   1 199.704 184.781   3
  -1 -21   1 195.787 171.326   3
   1 -21  -1 32.5370 129.653   3
  -1 -21   1 160.578 186.803   2
   0 -21  -1 871.717 257.787   2
   0 -21   1 856.144 247.533   3
   0 -21  -1 647.079 307.078   3
   0 -21   1 998.866 287.423   2
   1 -21   1 656.097 268.477   3
   1 -21   1 1026.96 324.744   2
  -1 -21  -1 467.165 171.997   3
   2 -21   1 429.937 264.950   3
  -2 -21  -1 171.201 173.617   3
   2 -21   1 656.356 248.897   2
  -3 -21  -1 106.462 135.161   3
   3 -21   1 128.723 124.068   3
  -4 -21  -1 640.284 282.626   3
   4 -21   1 242.688 164.501   3
   5 -21   1 187.220 135.530   3
  -5 -21  -1 145.745 127.540   3
   5  21   1 587.315 352.716   1
   6 -21   1 113.526 168.315   3
  -6 -21  -1 62.0118 118.877   3
   6  21   1 308.233 211.052   1
   7 -21   1 121.784 159.812   3
   7  21   1 318.274 259.145   1
  -7 -21  -1 101.821 154.235   3
   8  21   1 400.172 229.371   1
   8 -21   1 92.2895 191.120   3
  -8 -21  -1 126.779 133.465   3
  -9 -21  -1 70.5387 171.977   3
  -8 -22   1 196.184 252.140   3
  -7 -22   1 129.159 164.124   3
   6 -22  -1 630.331 302.391   3
  -6 -22   1 668.315 275.498   3
  -5 -22   1 167.644 152.125   3
   5 -22  -1 174.338 216.832   3
   4 -22  -1 318.781 241.463   3
  -4 -22   1 484.171 236.257   3
   3 -22  -1 899.852 272.682   3
  -3 -22   1 668.603 283.806   3
  -2 -22   1 546.214 276.473   2
  -2 -22   1 118.010 193.167   3
   2 -22  -1 1160.78 355.620   3
  -1 -22   1 660.418 227.456   2
  -1 -22   1 1243.80 314.539   3
   1 -22  -1 1129.00 304.266   3
   0 -22   1 919.057 229.930   2
   0 -22  -1 1042.48 382.396   3
   0 -22   1 1196.84 300.056   3
  -1 -22  -1 28.5459 130.583   3
   1 -22   1 104.722 156.544   3
   1 -22   1 209.443 194.941   2
   2 -22   1 191.049 180.553   2
  -2 -22  -1 21.1692 112.088   3
   2 -22   1 94.5188 201.462   3
  -3 -22  -1 740.483 253.478   3
   3 -22   1 726.814 296.528   3
  -4 -22  -1 442.913 225.289   3
   4 -22   1 230.489 185.090   3
  -5 -22  -1 25.9584 129.267   3
   5  22   1 264.654 255.019   1
   5 -22   1 123.315 190.222   3
   6  22   1 465.889 294.844   1
   6 -22   1 32.1369 142.370   3
  -6 -22  -1-7.93060 125.487   3
  -7 -22  -1 65.7508 140.173   3
  -6 -23   1 169.013 176.663   3
  -5 -23   1 279.345 204.466   3
   4 -23  -1 252.720 143.843   3
  -4 -23   1 312.753 236.220   3
   3 -23  -1 513.435 253.607   3
  -3 -23   1 230.677 194.534   3
  -2 -23   1 457.626 226.880   3
   2 -23  -1 301.281 190.947   3
  -1 -23   1 326.732 215.017   3
   1 -23  -1 66.6153 157.965   3
  -1 -23   1 201.180 162.080   2
   0 -23   1 2012.05 388.660   3
   0 -23  -1 1773.63 404.116   3
   0 -23   1 1258.86 326.012   2
   1 -23   1 754.707 331.483   2
  -1 -23  -1 275.062 235.830   3
   1 -23   1 562.027 267.008   3
  -2 -23  -1 158.471 169.764   3
   2 -23   1 76.7485 138.021   3
   3 -23   1 71.3156 139.156   3
  -3 -23  -1 111.515 164.185   3
   4 -23   1 181.799 138.178   3
  -4 -23  -1 29.2222 156.688   3
  -5 -23  -1 71.3928 149.175   3
  -4 -24   1 156.553 190.239   3
  -3 -24   1 148.970 176.753   3
  -2 -24   1 669.752 269.499   3
  -1 -24   1 2729.00 435.476   3
   0 -24   1 1654.60 373.779   3
   0 -24   1 1263.75 352.855   2
   0 -24  -1 1147.74 309.364   3
   1 -24   1 183.582 156.256   2
   1 -24   1 378.635 242.073   3
   2 -24   1 169.398 187.149   3
  17   0  -2 169.885 184.230   0
 -16   0   2 1701.09 309.627   2
  16   0  -2 1495.38 303.949   0
  15   0  -2 497.119 276.361   0
  14   0  -2 4702.14 415.629   0
  13   0  -2 6046.01 450.558   0
  12   0  -2 1209.02 188.220   0
  11   0  -2 90.9213 130.766   0
  10   0  -2 5106.01 443.164   0
   9   0  -2 11311.1 353.211   3
   9   0  -2 10089.2 388.523   0
   8   0  -2 783.463 188.005   3
   8   0  -2 155.667 94.1638   0
   7   0  -2 37048.5 409.930   3
   7   0  -2 37206.5 491.351   0
   7   0  -2 29585.9 125.002   1
   6   0  -2 1509.32 200.785   0
   6   0  -2 89.2049 55.6962   3
   5   0  -2 1060.35 121.972   0
   5   0  -2 293.180 95.5497   3
   4   0  -2 136999. 427.651   3
   4   0  -2 141676. 536.907   0
   3   0  -2 181.400 81.8646   3
   3   0  -2 91.3628 96.1914   0
  -3   0   2 95.1924 43.7358   1
  -2   0   2 53467.9 198.848   1
   2   0  -2 53372.8 168.823   3
  -1   0   2 47230.9 193.245   1
  -1   0   2 44740.6 190.790   2
   0   0   2 91393.1 281.010   1
   0   0   2 90053.1 217.046   2
   1   0   2 7225.20 85.3480   2
   1   0   2 7504.39 149.023   1
   1   0   2 7906.61 161.131   0
   2   0   2 35107.7 199.851   2
   2   0   2 33428.0 228.157   1
   2   0   2 37242.6 295.975   0
   3   0   2 14646.0 244.698   0
   3   0   2 12287.4 176.467   1
   4   0   2 6309.17 145.881   1
   4   0   2 8001.93 250.819   0
   5   0   2 50604.5 473.983   0
   5   0   2 48217.3 309.706   1
   6   0   2 14059.3 336.223   0
   6   0   2 13312.6 205.027   1
   7   0   2 18128.1 242.515   1
   7   0   2 18682.7 406.138   0
   8   0   2 26486.0 302.214   1
   8   0   2 29514.1 518.282   0
   9   0   2 5013.05 430.914   0
   9   0   2 2953.68 161.475   1
  10   0   2 20606.0 599.491   0
  11   0   2 13487.7 581.862   0
  12   0   2 9903.89 448.505   0
  13   0   2 643.967 229.912   0
  14   0   2 264.960 151.148   0
  15   0   2 71.7576 224.737   0
  16   0   2 1150.48 324.417   0
  17  -1  -2 70.8542 208.852   0
  17   1  -2 225.653 195.924   0
 -17   1   2 297.647 212.104   2
  16   1  -2 202.286 193.087   0
  16  -1  -2 160.242 190.366   0
 -16  -1   2 184.648 181.568   2
  15   1  -2 2259.03 357.700   0
  15  -1  -2 2746.15 392.322   0
 -15  -1   2 2064.59 330.620   2
 -14  -1   2 1988.22 316.385   2
  14  -1  -2 2032.00 306.427   0
  14   1  -2 2051.25 316.224   0
  13  -1  -2 3325.16 374.216   0
  13   1  -2 2568.47 370.972   0
  12  -1  -2 7513.69 417.448   0
  12   1  -2 6642.50 335.862   0
  11  -1  -2 12217.8 459.083   0
  11   1  -2 11550.7 455.893   0
  11  -1  -2 12845.3 396.550   3
  10  -1  -2 30533.4 523.455   3
  10  -1  -2 25351.5 538.020   0
  10   1  -2 24498.0 553.551   0
   9  -1  -2 5362.93 313.194   3
   9  -1  -2 4105.30 301.966   0
   9   1  -2 4472.66 349.967   0
   8   1  -2 3570.99 99.3240   1
   8  -1  -2 3902.92 237.816   3
   8   1  -2 3552.67 265.222   0
   8  -1  -2 3046.11 191.358   0
   7   1  -2 3821.80 272.523   0
   7  -1  -2 3985.10 255.668   0
   7  -1  -2 5100.64 241.676   3
   6   1  -2 39611.9 413.882   0
   6  -1  -2 35903.9 328.218   3
   6  -1  -2 38504.1 373.714   0
   5   1  -2 34479.1 355.041   0
   5  -1  -2 34116.8 346.819   0
   5  -1  -2 33728.3 302.514   3
   4   1  -2 3895.40 190.431   0
   4  -1  -2 6879.47 199.575   0
   4  -1  -2 5766.59 151.491   3
   3  -1  -2 18391.2 228.024   0
  -3   1   2 11499.1 94.4902   1
   3   1  -2 18052.0 254.207   0
  -3  -1   2 17450.0 226.195   2
   3  -1  -2 17887.7 178.482   3
  -2   1   2 2425.40 78.0050   1
  -2  -1   2 2172.33 95.8889   1
  -2  -1   2 2176.99 119.839   2
   2  -1  -2 2265.27 87.4617   3
  -1  -1   2 148262. 352.396   1
   1  -1  -2 133990. 995.714   3
  -1  -1   2 140270. 340.623   2
  -1   1   2 153426. 336.927   1
   0  -1   2 45698.1 203.938   2
   0   1   2 44576.1 203.072   0
   0  -1   2 42870.5 147.405   3
   0   1   2 44761.6 222.219   1
   0   1   2 43140.7 137.841   2
   0  -1   2 44608.7 221.789   1
   1   1   2 151.369 77.9242   0
   1  -1   2 145.146 54.4805   1
   1   1   2 117.389 84.0327   1
   1  -1   2 57.7739 25.8421   2
   1  -1   2 190.646 63.3460   3
   1  -1   2 59.0561 50.8045   0
   2  -1   2 1983.85 114.273   2
   2   1   2 2560.85 163.585   0
   2  -1   2 1905.48 119.601   3
   2  -1   2 1945.75 92.5078   1
   2   1   2 2250.60 167.236   1
   2  -1   2 2457.61 129.099   0
   3   1   2 58306.5 315.015   1
   3   1   2 62942.9 388.588   0
   3  -1   2 57251.8 294.289   1
   3  -1   2 56337.2 352.186   3
   3  -1   2 62591.6 414.365   0
   4  -1   2 62687.6 433.341   3
   4   1   2 66652.7 475.315   0
   4  -1   2 63743.1 429.662   0
   4  -1   2 61610.4 318.947   1
   4   1   2 60138.7 347.979   1
   5  -1   2 709.959 129.849   0
   5  -1   2 72.3021 57.5740   1
   5  -1   2 778.155 166.676   3
   5   1   2 79.2068 74.7578   1
   5   1   2 550.739 180.773   0
   6   1   2 9692.39 198.377   1
   6  -1   2 10359.4 293.379   3
   6  -1   2 10976.1 331.209   0
   6   1   2 10614.2 304.206   0
   6  -1   2 10069.4 191.381   1
   7  -1   2 1082.40 192.410   0
   7  -1   2 909.790 91.5217   1
   7   1   2 1277.14 238.081   0
   7  -1   2 1185.92 224.051   3
   7   1   2 811.143 114.052   1
   8  -1   2 15342.8 507.498   0
   8  -1   2 9622.54 171.507   1
   8   1   2 12880.9 245.161   1
   8   1   2 14525.8 414.383   0
   9  -1   2 46117.1 665.435   0
   9   1   2 46577.9 405.443   1
   9   1   2 48677.1 737.128   0
  10   1   2 84.7126 121.760   0
  10  -1   2 160.669 206.012   0
  11   1   2 8109.01 478.966   0
  11  -1   2 9120.42 462.515   0
  12   1   2 885.481 262.500   0
  12  -1   2 439.092 185.683   0
  13   1   2 1239.02 302.373   0
  13  -1   2 1324.29 287.158   0
  14   1   2 1211.52 237.916   0
  14  -1   2 1034.94 245.921   0
  15  -1   2 796.803 303.450   0
  15   1   2 495.057 229.903   0
  16  -1   2 300.319 229.958   0
  16   1   2 560.526 321.077   0
  17  -2  -2 697.605 245.224   0
  17   2  -2 546.484 265.187   0
  16   2  -2 148.935 182.542   0
  16  -2  -2 689.162 319.171   0
 -15  -2   2 95.0535 132.018   2
  15   2  -2 487.978 266.217   0
  15  -2  -2 90.8849 177.896   0
 -14  -2   2 2495.29 315.695   2
  14  -2  -2 2920.56 345.467   0
  14   2  -2 2873.14 331.711   0
 -13  -2   2 9457.50 464.155   2
  13   2  -2 7848.41 522.563   0
  13  -2  -2 8318.56 562.396   0
  12  -2  -2 2612.50 304.717   0
 -12  -2   2 3459.37 327.601   2
  12  -2  -2 2016.66 215.266   3
  12   2  -2 2256.03 279.802   0
  11  -2  -2 162.971 173.383   0
 -11  -2   2 719.751 211.739   2
  11  -2  -2 840.128 237.732   3
  11   2  -2 104.350 116.052   0
 -10  -2   2 2168.69 311.010   2
  10  -2  -2 1339.50 264.842   3
  10  -2  -2 276.426 184.511   0
  10   2  -2 308.340 159.995   0
   9  -2  -2 4609.84 299.969   0
   9  -2  -2 4827.47 216.287   3
  -9  -2   2 6462.82 357.673   2
   9   2  -2 6235.70 394.603   0
   9   2  -2 5183.74 167.164   1
   8   2  -2 9199.70 348.786   0
  -8  -2   2 12015.1 394.354   2
   8  -2  -2 8461.36 254.929   3
   8  -2  -2 9280.07 270.960   0
   7  -2  -2 249.510 122.685   0
   7   2  -2 491.951 187.592   0
  -7  -2   2 494.095 141.860   2
   7  -2  -2 288.615 126.994   3
   6  -2  -2 10589.1 234.650   3
   6  -2  -2 12154.4 318.543   0
   6   2  -2 10544.8 287.161   0
  -6  -2   2 9857.56 300.358   2
   5   2  -2 52.4198 49.9875   0
  -5  -2   2 273.194 123.539   2
   5  -2  -2 266.706 78.6421   0
   5  -2  -2 140.469 86.6863   3
   4  -2  -2 30121.3 294.658   0
  -4  -2   2 30866.6 294.011   2
   4  -2  -2 29186.5 252.057   3
   4   2  -2 31856.9 301.559   0
  -3  -2   2 48149.1 314.370   2
   3   2  -2 51192.7 355.005   0
  -3   2   2 47702.4 190.638   1
   3  -2  -2 47995.2 278.570   3
   3  -2  -2 48948.8 318.789   0
  -2  -2   2 289239. 2181.08   2
  -2   2   2 348881. 1891.25   1
   2  -2  -2 344871. 2138.93   3
  -2  -2   2 375663. 2344.31   1
   1  -2  -2 6408.03 108.410   3
  -1  -2   2 6868.13 147.096   1
  -1   2   2 6872.82 124.119   1
  -1  -2   2 6074.17 122.778   2
   0  -2   2 33878.3 250.619   1
   0   2   2 35349.1 241.711   1
   0  -2   2 32647.7 166.143   3
   0  -2   2 32888.1 215.578   2
   1  -2   2 564607. 2899.17   2
   1  -2   2 569174. 3005.38   1
   1  -2   2 553166. 2801.79   0
   1  -2   2 537059. 2743.61   3
   1   2   2 559156. 3028.23   1
   1   2   2 572367. 2915.10   0
   2   2   2 508.743 62.1440   1
   2  -2   2 896.134 133.389   0
   2  -2   2 1144.96 130.723   2
   2  -2   2 705.477 98.4369   1
   2   2   2 1563.86 162.128   0
   2  -2   2 787.550 97.7633   3
   3  -2   2 56635.6 337.885   2
   3  -2   2 55058.7 370.452   3
   3  -2   2 54882.9 302.165   1
   3   2   2 61026.5 425.612   0
   3  -2   2 56079.8 360.288   0
   3   2   2 57323.6 356.446   1
   4  -2   2 17973.4 312.059   0
   4  -2   2 15812.7 277.453   3
   4   2   2 16293.7 237.286   1
   4  -2   2 16544.4 213.864   1
   4   2   2 17473.4 300.453   0
   5  -2   2 6822.44 236.589   3
   5  -2   2 6941.11 154.379   1
   5   2   2 6936.08 205.156   1
   5   2   2 6719.02 231.697   0
   5  -2   2 6758.58 265.320   0
   6  -2   2 929.495 175.265   0
   6  -2   2 812.431 122.843   1
   6  -2   2 924.418 212.742   3
   6   2   2 684.406 121.298   1
   6   2   2 718.651 161.013   0
   7  -2   2 3048.43 213.820   3
   7  -2   2 3079.45 138.489   1
   7  -2   2 3506.67 255.410   0
   7   2   2 3939.40 229.040   1
   7   2   2 3673.01 278.411   0
   8  -2   2 28764.0 504.008   0
   8   2   2 26253.7 332.907   1
   8  -2   2 28086.0 289.361   1
   8   2   2 29500.2 575.384   0
   8  -2   2 28005.9 485.066   3
   9   2   2 555.178 133.269   1
   9   2   2 335.182 120.484   0
   9  -2   2 560.611 146.587   3
   9  -2   2 899.304 332.283   0
  10   2   2 6214.71 373.634   0
  10  -2   2 6290.94 414.068   0
  11   2   2 221.590 208.529   0
  11  -2   2 528.090 254.401   0
  12   2   2 3022.06 367.008   0
  12  -2   2 2986.51 359.037   0
  13  -2   2 248.866 204.130   0
  13   2   2 311.892 192.506   0
  14   2   2 388.968 245.614   0
  14  -2   2 109.217 164.730   0
  15  -2   2 64.3654 178.243   0
  15   2   2 96.1291 166.350   0
  16   2   2 61.9550 159.333   0
  16  -2   2 52.4923 153.000   0
  17  -2   2 353.028 220.042   0
  17  -3  -2 253.254 229.648   0
  17   3  -2 207.192 249.522   0
  16   3  -2 181.914 167.308   0
  16  -3  -2 380.296 268.375   0
 -15  -3   2 145.292 128.974   2
  15  -3  -2 5.47504 116.271   0
  15   3  -2 183.536 186.840   0
  14  -3  -2 102.774 130.499   0
  14   3  -2 89.5885 116.917   0
 -14  -3   2 141.626 131.619   2
  13  -3  -2 315.880 196.570   0
  13   3  -2 245.486 148.990   0
  13  -3  -2 449.887 180.771   3
 -13  -3   2 511.288 201.773   2
  12   3  -2 2619.97 310.331   0
  12  -3  -2 2705.55 293.918   0
  12  -3  -2 3804.74 355.548   3
 -12  -3   2 3523.40 336.554   2
 -11  -3   2 64.3872 90.5952   2
  11   3  -2 57.1252 123.130   0
  11  -3  -2 147.672 118.275   3
  11  -3  -2-10.6584 88.3899   0
  10   3  -2 486.237 114.648   0
 -10  -3   2 1024.14 265.112   2
  10  -3  -2 544.564 140.688   3
  10  -3  -2 563.608 116.778   0
   9   3  -2 23694.6 272.446   1
   9  -3  -2 24150.9 462.765   0
  -9  -3   2 26129.5 464.921   2
   9  -3  -2 24662.8 430.501   3
   9   3  -2 25075.3 529.396   0
  -8  -3   2 14973.7 336.309   2
   8   3  -2 16147.7 400.840   0
   8  -3  -2 15992.9 374.594   3
   8  -3  -2 15509.3 367.301   0
   7   3  -2 73.5946 78.6639   0
   7  -3  -2 20.9456 126.132   0
  -7  -3   2 129.243 118.375   2
   7  -3  -2 40.7595 65.6950   3
   6   3  -2 8785.11 251.896   0
  -6  -3   2 7528.57 209.092   2
   6  -3  -2 8690.58 238.892   3
   6  -3  -2 8987.21 280.468   0
   5  -3  -2 42123.7 366.542   0
   5   3  -2 43939.7 389.388   0
  -5  -3   2 41632.9 335.880   2
   5  -3  -2 45849.7 374.411   3
   4  -3  -2 33580.7 313.450   3
  -4  -3   2 32629.2 297.674   2
  -4   3   2 30828.3 159.516   1
   4  -3  -2 31215.4 308.256   0
   4   3  -2 31706.5 288.055   0
   3  -3  -2 1252.08 137.177   0
  -3   3   2 1145.72 71.5581   1
   3   3  -2 1298.08 135.854   0
   3  -3  -2 1281.91 116.789   3
  -3  -3   2 1376.62 142.569   2
  -2   3   2 1471.86 135.515   1
   2  -3  -2 1164.61 103.362   3
  -2  -3   2 1295.40 126.620   2
  -1   3   2 8851.01 234.938   1
  -1  -3   2 7963.77 124.154   3
   1  -3  -2 6967.49 125.278   3
  -1  -3   2 7654.29 157.808   2
   0   3   2 31742.1 283.816   1
   0  -3   2 32468.3 285.542   1
   0  -3  -2 29903.2 222.618   3
   0  -3   2 31800.5 284.958   2
   0  -3   2 30331.3 187.592   3
   1  -3   2 160.795 47.9479   3
   1   3   2 193.460 67.0106   1
   1  -3   2 210.775 46.9452   0
   1   3   2 187.201 58.3748   0
   1  -3   2 164.074 73.5991   2
   1  -3   2 127.518 70.5509   1
   2  -3   2 24145.9 225.639   0
   2   3   2 22341.7 255.293   1
   2  -3   2 23713.3 222.125   1
   2  -3   2 23296.6 240.060   2
   2   3   2 25543.1 265.508   0
   2  -3   2 23730.5 252.503   3
   3   3   2 3540.66 177.814   1
   3  -3   2 3872.61 180.294   2
   3  -3   2 3618.75 164.344   3
   3  -3   2 3513.81 127.631   0
  -3  -3  -2 3609.16 72.3906   2
   3   3   2 3861.16 140.332   0
   3  -3   2 3615.31 128.237   1
  -4  -3  -2 47072.5 212.600   2
   4  -3   2 48480.2 299.150   1
   4  -3   2 46194.2 372.540   3
   4  -3   2 51860.3 417.872   0
   4   3   2 51671.3 386.003   0
   4   3   2 45069.5 323.784   1
  -5  -3  -2 576.815 79.3579   2
   5  -3   2 327.578 70.6419   3
   5  -3   2 689.414 110.787   1
   5   3   2 617.804 119.168   0
   5  -3   2 540.119 125.759   0
   5   3   2 302.848 59.7867   1
   6  -3   2 303.323 125.670   3
   6  -3   2 484.501 142.635   0
   6   3   2 965.031 151.935   1
   6  -3   2 452.255 96.7282   1
   6   3   2 544.929 165.150   0
  -6  -3  -2 332.833 97.7895   2
   7  -3   2 17039.9 232.176   1
   7  -3   2 17115.4 391.704   3
   7   3   2 17570.5 300.097   1
   7  -3   2 17694.0 405.173   0
   7   3   2 18374.9 409.565   0
   8   3   2 909.406 214.391   0
   8   3   2 932.181 173.012   1
   8  -3   2 744.538 105.388   1
   8  -3   2 1168.60 221.223   0
   8  -3   2 1443.48 287.734   3
   9  -3   2 199.494 97.6774   0
   9   3   2 339.464 178.649   0
   9   3   2 421.140 139.202   1
  -9  -3  -2 638.831 129.269   2
   9  -3   2 340.882 171.968   3
 -10  -3  -2 1180.15 175.289   2
  10   3   2 912.816 243.776   0
  10  -3   2 982.089 199.654   3
  10  -3   2 907.619 218.492   0
  11  -3   2 1963.58 307.946   3
  11  -3   2 1277.45 280.326   0
  11   3   2 1148.12 296.000   0
  12  -3   2 21.1899 90.9692   0
  12   3   2 16.3160 102.471   0
  13  -3   2 2424.61 321.209   0
  13   3   2 3031.35 396.726   0
  14  -3   2 74.1371 145.205   0
  14   3   2 58.2682 122.500   0
  15   3   2 14.0555 103.279   0
  15  -3   2-11.5431 123.699   0
  16   3   2 862.819 347.231   0
  16  -3   2 1240.53 367.381   0
  17   4  -2 3224.93 456.283   0
  17  -4  -2 3945.82 468.190   0
  16  -4  -2 2815.58 368.731   0
  16   4  -2 2387.48 340.599   0
  15  -4  -2 1134.59 246.678   0
  15   4  -2 1272.45 321.286   0
  14  -4  -2 2270.86 307.447   0
  14   4  -2 2318.48 381.674   0
 -14  -4   2 2161.10 288.476   2
  14  -4  -2 2538.41 401.241   3
 -13  -4   2 434.709 143.363   2
  13   4  -2 290.240 167.376   0
  13  -4  -2 454.643 186.805   0
  13  -4  -2 641.740 219.619   3
 -12  -4   2 804.183 215.954   2
  12  -4  -2 954.376 241.266   0
  12   4  -2 901.800 248.632   0
  12  -4  -2 586.768 194.636   3
  11  -4  -2 4408.54 315.870   3
  11   4  -2 4316.37 307.977   0
 -11  -4   2 4750.17 323.830   2
  11  -4  -2 3930.59 235.775   0
 -10  -4   2 7291.15 336.895   2
  10  -4  -2 7883.43 403.832   3
  10  -4  -2 7337.75 318.082   0
  10   4  -2 6663.34 313.938   0
  -9  -4   2 4274.68 261.347   2
   9  -4  -2 4595.35 298.665   3
   9  -4  -2 4044.37 251.768   0
   9   4  -2 4417.36 344.015   0
   8  -4  -2 28515.3 475.529   3
   8  -4  -2 28169.9 453.141   0
   8   4  -2 29211.3 488.777   0
  -8  -4   2 27038.7 416.700   2
   7  -4  -2 21862.7 408.632   0
   7   4  -2 22490.5 421.607   0
   7  -4  -2 22240.6 367.424   3
  -7  -4   2 20990.1 345.910   2
   6   4  -2 53300.2 486.733   0
  -6  -4   2 52263.5 443.565   2
   6  -4  -2 50759.7 432.010   3
   6  -4  -2 50035.5 419.517   0
  -6   4   2 42919.0 141.386   1
  -5  -4   2 61799.0 411.312   2
   5  -4  -2 64151.5 414.828   3
   5  -4  -2 61428.3 397.714   0
   5   4  -2 67160.7 466.922   0
  -5   4   2 61012.5 226.755   1
   4  -4  -2 2386.37 159.849   0
  -4   4   2 2613.58 114.140   1
   4  -4  -2 2628.97 155.453   3
   4   4  -2 2397.97 171.788   0
  -4  -4   2 2489.53 149.642   2
   3  -4  -2 158.399 104.365   3
   3  -4  -2 143.730 98.2575   0
   3   4  -2 365.165 143.400   0
  -3  -4   2 128.391 93.5244   2
  -3   4   2 442.693 95.2713   1
   2  -4  -2 9155.01 216.422   3
  -2  -4   2 8149.36 136.280   3
  -2   4   2 10148.7 210.343   1
  -2  -4   2 8033.10 174.770   2
   1  -4  -2 40563.1 277.156   3
  -1  -4   2 39860.2 294.327   2
  -1  -4   2 40680.7 229.958   3
  -1   4   2 47374.5 354.954   1
   0   4   2 36483.1 330.651   1
   0  -4  -2 32523.8 265.452   3
   0  -4   2 33400.4 283.817   2
   0  -4   2 31405.3 216.701   3
   1  -4   2 15577.9 165.010   0
   1   4   2 17338.4 266.713   1
   1  -4   2 17670.0 265.909   1
  -1  -4  -2 16673.8 157.983   2
   1  -4   2 15390.2 200.886   3
   1   4   2 14750.8 151.016   0
   1  -4   2 15616.5 224.323   2
   2   4   2 7484.44 228.030   1
   2   4   2 7544.76 173.823   0
   2  -4   2 6361.42 138.120   3
  -2  -4  -2 7173.44 81.3727   2
   2  -4   2 7506.63 178.219   0
   2  -4   2 7907.89 228.441   2
   2  -4   2 7645.51 176.708   1
  -3  -4  -2 5911.37 86.6860   2
   3  -4   2 6171.91 173.078   1
   3   4   2 5899.03 151.618   0
   3  -4   2 6263.60 203.487   2
   3  -4   2 6519.54 196.445   0
   3  -4   2 6005.70 192.886   3
   3   4   2 6039.69 226.184   1
   4  -4   2 54702.7 429.261   2
  -4  -4  -2 49646.1 224.751   2
   4  -4   2 51254.5 334.486   1
   4  -4   2 51958.3 437.037   3
   4  -4   2 52851.6 393.331   0
   4   4   2 50759.3 425.917   1
   4   4   2 54266.3 416.355   0
  -5  -4  -2 21269.4 193.162   2
   5  -4   2 20487.4 298.232   3
   5   4   2 23424.3 332.732   0
   5  -4   2 23320.0 341.251   0
   5  -4   2 23207.3 266.052   1
   5   4   2 21422.7 288.771   1
   6   4   2 30084.9 414.255   0
  -6  -4  -2 27297.6 239.690   2
   6  -4   2 30400.3 429.965   0
   6   4   2 26854.9 330.144   1
   6  -4   2 26492.9 367.091   3
   6  -4   2 27061.3 259.607   1
   7  -4   2 54.3768 47.4649   1
   7  -4   2 152.105 167.396   0
   7   4   2 167.646 121.080   0
   7  -4   2 208.611 134.202   3
  -7  -4  -2 76.6846 66.9355   2
   7   4   2 110.375 70.2875   1
  -8  -4  -2 6087.88 218.690   2
   8  -4   2 5857.92 180.038   1
   8  -4   2 5672.00 270.262   3
   8   4   2 5803.45 346.669   0
   8   4   2 6235.29 255.788   1
   8  -4   2 5916.67 308.247   0
   9  -4   2 2654.83 253.632   0
   9   4   2 2846.47 224.157   1
   9   4   2 2233.94 252.806   0
  -9  -4  -2 2899.77 206.885   2
   9  -4   2 2546.43 244.803   3
  10   4   2 295.229 150.255   0
  10   4   2 409.748 132.284   1
  10  -4   2 443.789 198.559   0
  10  -4   2 351.560 264.881   3
  11   4   2 294.583 184.911   0
  11  -4   2 282.210 177.171   3
  11  -4   2 183.170 187.945   0
  12  -4   2 335.690 219.616   3
  12  -4   2 856.984 198.181   0
  12   4   2 580.564 133.049   0
  13   4   2 1010.80 242.613   0
  13  -4   2 965.763 205.698   0
  14  -4   2 2372.22 309.770   0
  14   4   2 2294.52 304.478   0
  15   4   2 95.2718 180.080   0
  15  -4   2 149.383 130.942   0
  16   4   2 411.456 233.667   0
  16  -4   2 280.513 225.153   0
  17  -5  -2 447.189 299.791   0
  17   5  -2 335.429 297.750   0
  16  -5  -2 1536.09 386.637   0
  16   5  -2 849.573 313.315   0
  15  -5  -2 136.354 137.334   0
  15  -5  -2 16.2906 111.644   3
  15   5  -2 9.20810 112.832   0
  14  -5  -2 1505.13 335.271   3
  14   5  -2 874.438 207.733   0
  14  -5  -2 749.372 203.498   0
 -14  -5   2 911.818 195.133   2
 -13  -5   2 2049.25 247.404   2
  13   5  -2 1854.31 268.976   0
  13  -5  -2 1814.90 268.472   0
  13  -5  -2 2807.06 336.992   3
  12   5  -2 4763.02 400.992   0
 -12  -5   2 4157.59 303.535   2
  12  -5  -2 4215.45 340.671   0
  12  -5  -2 4412.08 360.010   3
  11   5  -2 71.7177 99.7003   0
  11  -5  -2 80.2407 98.4898   0
  11  -5  -2 139.323 94.1119   3
 -11  -5   2 154.038 124.446   2
  10   5  -2 175.714 93.6934   0
  10  -5  -2 288.653 145.388   3
 -10  -5   2 159.430 96.0669   2
  10   5  -2 592.301 168.692   1
  10  -5  -2 187.129 136.212   0
   9  -5  -2 18381.4 490.148   0
   9  -5  -2 20037.7 500.556   3
   9   5  -2 18111.3 512.522   0
  -9  -5   2 17341.7 386.655   2
   8   5  -2 26450.9 508.230   0
  -8  -5   2 23990.0 419.435   2
   8  -5  -2 25306.3 459.846   0
   8  -5  -2 24962.2 442.233   3
  -7  -5   2 10.8110 55.4010   2
   7  -5  -2 10.0032 43.2266   3
  -7   5   2 98.7413 25.6877   1
   7   5  -2 170.574 140.672   0
   7  -5  -2 92.6122 124.478   0
   6   5  -2 3340.12 164.522   0
  -6   5   2 3721.61 111.846   1
   6  -5  -2 3186.38 199.249   0
  -6  -5   2 3489.92 162.472   2
   6  -5  -2 1035.89 137.343   3
   5  -5  -2 15583.7 244.070   0
  -5   5   2 17019.7 175.133   1
   5  -5  -2 16477.7 296.269   3
   5   5  -2 14964.5 215.740   0
  -5  -5   2 15567.9 269.160   2
   4  -5  -2 22681.1 308.023   3
  -4  -5   2 21251.5 277.123   2
   4   5  -2 21650.6 287.038   0
   4  -5  -2 21380.6 264.200   0
   3  -5  -2 52599.3 298.742   0
  -3  -5   2 54308.8 368.628   2
   3  -5  -2 56373.3 395.642   3
   3   5  -2 53749.6 319.108   0
  -2  -5   2 46863.1 279.164   3
  -2  -5   2 47259.7 332.311   2
   2  -5  -2 48731.8 370.179   3
  -1  -5   2 14218.3 193.636   3
  -1  -5   2 13473.8 223.743   2
   1  -5  -2 13365.0 206.283   3
   0  -5  -2 53.0639 50.1101   3
   0  -5   2 61.4462 44.5676   3
   0  -5  -2 145.560 84.2681   2
   0  -5   2 291.997 129.367   2
   1  -5   2 74823.1 283.475   0
   1  -5   2 77056.4 394.941   3
   1  -5   2 79195.9 446.041   2
  -1  -5  -2 81361.9 300.951   2
   1   5   2 82471.4 466.019   1
   1   5   2 78019.7 306.788   0
   2  -5   2 535.814 95.4704   3
   2   5   2 1349.58 203.902   1
   2   5   2 587.835 103.531   0
   2  -5   2 569.792 82.0702   0
   2  -5   2 606.221 114.277   2
  -2  -5  -2 540.475 69.7798   2
  -3  -5  -2 24111.2 169.075   2
   3  -5   2 23339.3 308.552   2
   3   5   2 25323.7 351.667   1
   3  -5   2 25023.4 337.175   3
   3  -5   2 26379.2 291.127   1
   3  -5   2 25518.2 265.370   0
   3   5   2 26367.4 285.366   0
   4  -5   2 1000.63 130.869   1
   4   5   2 1372.34 211.337   1
   4  -5   2 1053.51 197.249   3
   4  -5   2 268.197 63.4054   0
   4   5   2 403.525 77.4877   0
  -4  -5  -2 733.262 78.2198   2
   4  -5   2 1703.94 210.831   2
   5   5   2 87245.5 589.906   0
   5   5   2 81738.8 535.069   1
   5  -5   2 88162.4 451.372   1
   5  -5   2 82019.8 607.797   3
   5  -5   2 85744.9 549.239   0
  -5  -5  -2 80162.5 333.295   2
   6   5   2 3589.56 202.827   1
  -6  -5  -2 3557.09 121.266   2
   6  -5   2 3755.71 245.855   3
   6  -5   2 4190.09 176.462   1
   6   5   2 4196.33 290.837   0
   6  -5   2 4095.21 258.519   0
   7   5   2 60461.6 648.319   0
   7  -5   2 55865.7 547.766   0
   7  -5   2 57242.0 387.227   1
   7   5   2 54062.7 512.272   1
  -7  -5  -2 52035.9 357.715   2
   7  -5   2 56966.5 654.418   3
   8   5   2 10798.3 383.177   0
   8  -5   2 10668.4 364.698   3
   8   5   2 9558.26 284.523   1
  -8  -5  -2 9336.41 212.574   2
   8  -5   2 11098.9 401.593   0
  -9  -5  -2 167.723 59.3981   2
   9  -5   2 152.143 131.860   0
   9   5   2 133.861 90.6568   0
   9   5   2 255.310 173.032   1
   9  -5   2 262.919 146.486   3
  10   5   2 6117.16 261.758   1
  10  -5   2 6231.23 351.056   0
  10   5   2 5946.22 322.619   0
  10  -5   2 6492.46 410.369   3
  11  -5   2 1118.55 205.103   0
  11  -5   2 1211.22 257.984   3
  11   5   2 1215.14 215.440   0
  12  -5   2 10872.4 540.444   3
  12  -5   2 8514.04 423.733   0
  12   5   2 8496.66 465.108   0
  13  -5   2 1302.15 389.551   3
  13  -5   2 1877.11 301.637   0
  13   5   2 1788.00 298.297   0
  14   5   2 921.189 269.574   0
  14  -5   2 580.952 255.049   0
  15  -5   2 121.484 170.967   0
  15   5   2 109.879 148.040   0
  16  -5   2 1194.91 259.674   0
  16   5   2 1247.45 305.077   0
  17   6  -2 2697.86 393.664   0
  17  -6  -2 3013.13 425.354   0
  16  -6  -2 937.994 325.667   0
  16  -6  -2 388.286 258.041   3
  16   6  -2 1173.39 284.110   0
  15  -6  -2 501.763 213.741   3
  15   6  -2 454.978 186.074   0
  15  -6  -2 641.487 203.810   0
  14  -6  -2 2884.34 340.043   3
  14   6  -2 1590.86 229.051   0
  14  -6  -2 1690.12 230.803   0
  13  -6  -2 1431.71 293.260   3
  13  -6  -2 528.398 160.641   0
  13   6  -2 596.779 204.106   0
 -13  -6   2 815.095 151.920   2
  12  -6  -2 3951.33 290.925   0
 -12  -6   2 4088.02 272.250   2
  12  -6  -2 3706.06 286.608   3
  12   6  -2 3987.09 331.646   0
  11  -6  -2 3242.32 262.396   0
  11  -6  -2 2881.57 255.920   3
  11   6  -2 3246.21 272.481   0
 -11  -6   2 2762.58 241.900   2
  10   6  -2 4808.85 331.294   0
  10  -6  -2 4664.06 260.299   3
  10  -6  -2 4645.12 313.341   0
 -10  -6   2 4500.68 252.441   2
   9  -6  -2 2387.63 194.402   3
   9   6  -2 2315.54 269.889   0
  -9  -6   2 1628.56 132.875   2
   9  -6  -2 2254.07 223.386   0
   8   6  -2 9022.86 375.266   0
   8  -6  -2 9131.00 336.347   0
   8  -6  -2 8365.01 345.394   3
  -8  -6   2 8188.65 277.650   2
  -7   6   2 33338.9 214.467   1
   7  -6  -2 37446.2 475.319   0
   7   6  -2 37664.1 493.598   0
   7  -6  -2 35294.3 492.641   3
  -7  -6   2 35741.4 416.624   2
  -6   6   2 40134.0 257.742   1
   6   6  -2 41481.8 441.148   0
   6  -6  -2 39111.9 437.526   3
  -6  -6   2 40810.4 417.019   2
   6  -6  -2 38265.5 379.702   0
   5   6  -2 52521.8 406.679   0
   5  -6  -2 55723.0 494.097   3
   5  -6  -2 49796.0 370.629   0
  -5  -6   2 54676.3 457.005   2
   4  -6  -2 126.187 78.2019   0
   4   6  -2 217.684 117.567   0
   4  -6  -2 24.8687 63.9458   3
  -4  -6   2 51.1785 64.7213   2
   3   6  -2 29488.5 267.702   0
  -3  -6   2 31813.0 344.219   2
   3  -6  -2 28017.0 243.094   0
  -3  -6   2 29963.3 276.571   3
   3  -6  -2 29287.2 329.434   3
  -2  -6   2 7909.90 220.974   2
   2   6  -2 7136.35 137.549   0
  -2  -6   2 6983.79 160.291   3
   2  -6  -2 6954.89 206.807   3
   1  -6  -2 33887.4 336.530   3
  -1  -6   2 32961.6 322.855   2
  -1  -6   2 32730.1 274.682   3
   0  -6   2 16706.5 252.640   2
   0  -6   2 16143.4 226.000   3
   0  -6  -2 17940.9 227.508   2
   0  -6  -2 16315.0 243.846   3
   1  -6   2 15276.7 151.634   0
   1   6   2 15940.2 170.429   0
   1  -6   2 16208.0 284.223   2
  -1  -6  -2 16434.1 276.850   3
   1  -6   2 14975.0 223.210   3
  -1  -6  -2 16714.1 201.328   2
   2   6   2 3497.57 138.218   0
   2  -6   2 3321.60 180.301   2
   2  -6   2 3081.03 109.029   0
  -2  -6  -2 3252.58 112.680   2
   2  -6   2 2880.53 144.650   3
   2   6   2 3990.02 230.624   1
   3   6   2 54131.3 450.914   1
   3  -6   2 48974.7 420.554   3
   3  -6   2 54326.7 353.662   0
   3  -6   2 49760.7 450.939   2
   3   6   2 56030.5 378.989   0
  -3  -6  -2 50245.7 258.747   2
   4   6   2 115739. 602.645   1
   4   6   2 121515. 586.338   0
   4  -6   2 125062. 555.280   0
   4  -6   2 124184. 703.201   2
   4  -6   2 112406. 612.407   3
  -4  -6  -2 115328. 384.694   2
  -5  -6  -2 6539.34 149.596   2
   5  -6   2 6032.74 191.032   0
   5  -6   2 6349.74 270.522   3
   5   6   2 6575.85 222.653   0
   5   6   2 6955.59 254.261   1
   6   6   2 26452.5 436.178   1
   6  -6   2 26208.7 451.768   3
   6   6   2 27595.0 408.923   0
  -6  -6  -2 24535.5 244.575   2
   6  -6   2 28809.3 421.563   0
  -7  -6  -2 730.989 134.384   2
   7  -6   2 1215.43 240.487   3
   7   6   2 732.911 175.247   0
   7  -6   2 726.537 199.506   0
   7   6   2 488.818 182.974   1
  -8  -6  -2 5472.40 197.189   2
   8  -6   2 5987.24 353.827   3
   8   6   2 4934.85 288.267   1
   8   6   2 5878.58 368.425   0
   8  -6   2 5341.86 298.196   0
   9   6   2 5538.60 384.047   0
   9   6   2 4140.01 232.467   1
   9  -6   2 5649.34 380.679   3
   9  -6   2 5071.16 313.595   0
  10   6   2 801.227 248.743   0
  10   6   2 1204.19 230.240   1
  10  -6   2 800.583 241.394   0
  10  -6   2 630.218 159.816   3
  11  -6   2 2089.48 332.893   3
  11  -6   2 1728.82 252.535   0
  11   6   2 1573.94 223.375   0
  12  -6   2 9.94667 88.0572   0
  12   6   2 23.0373 109.834   0
  12  -6   2 805.001 313.043   3
  13  -6   2 8877.04 475.148   3
  13   6   2 7784.87 522.473   0
  13  -6   2 6762.86 471.255   0
  14  -6   2 1977.67 306.219   3
  14   6   2 1728.53 326.293   0
  14  -6   2 1268.11 253.185   0
  15  -6   2 1752.63 334.378   0
  15   6   2 2301.62 398.702   0
  16   6   2 228.444 200.198   0
  16  -6   2 328.997 213.497   0
  17  -7  -2 536.549 255.377   0
  17  -7  -2 961.585 302.585   3
  17   7  -2 710.236 330.242   0
  16  -7  -2 186.351 221.229   3
  16  -7  -2 103.357 191.848   0
  16   7  -2 191.318 168.696   0
  15  -7  -2 10.8037 130.781   3
  15  -7  -2-18.3860 100.767   0
  15   7  -2 158.001 170.644   0
  14  -7  -2 1943.54 300.458   0
  14   7  -2 2243.62 326.609   0
  14  -7  -2 2245.63 309.188   3
  13  -7  -2 4284.27 345.711   3
 -13  -7   2 4730.33 303.237   2
  13   7  -2 3976.19 327.385   0
  13  -7  -2 3960.61 307.929   0
  12  -7  -2 63.4804 101.739   0
  12   7  -2 71.6710 106.336   0
 -12  -7   2 70.9681 85.4373   2
  12  -7  -2 232.666 242.302   3
 -11  -7   2 2824.95 255.275   2
  11  -7  -2 2298.10 261.750   0
  11   7  -2 2299.29 296.458   0
  11  -7  -2 2602.99 306.000   3
  10  -7  -2 938.565 237.061   3
  10  -7  -2 692.839 201.669   0
  10   7  -2 939.707 163.911   0
 -10  -7   2 834.683 189.111   2
  -9  -7   2 2138.64 218.876   2
   9   7  -2 2181.75 243.879   0
   9  -7  -2 1922.88 184.657   0
   9  -7  -2 1977.97 226.316   3
   8   7  -2 12910.7 410.769   0
   8  -7  -2 13113.5 421.000   3
  -8  -7   2 13259.2 345.537   2
   8  -7  -2 13195.8 378.451   0
   7  -7  -2 15696.3 372.220   3
  -7   7   2 22015.0 239.425   1
  -7  -7   2 21167.8 371.817   2
   7  -7  -2 20952.6 373.866   0
   7   7  -2 21559.5 415.196   0
   6  -7  -2 12076.1 294.063   0
  -6  -7   2 12478.1 304.716   2
   6  -7  -2 13508.7 351.870   3
   6   7  -2 12521.9 300.418   0
   5  -7  -2 117.832 118.119   3
   5   7  -2 268.447 66.2173   0
   5  -7  -2-6.29578 41.0654   0
  -5  -7   2 330.145 81.4388   2
   4  -7  -2 52703.5 460.607   3
  -4  -7   2 54060.3 458.253   2
   4   7  -2 52500.4 362.226   0
   4  -7  -2 54121.3 364.195   0
   3   7  -2 2831.63 114.706   0
   3  -7  -2 2847.08 122.617   0
  -3  -7   2 3423.31 171.628   3
   3  -7  -2 3099.83 209.329   3
  -3  -7   2 3396.36 207.484   2
   2  -7  -2 19856.7 294.587   3
   2  -7  -2 19878.6 177.920   0
  -2  -7   2 19584.0 266.111   3
  -2  -7   2 20216.5 293.963   2
   2   7  -2 19435.3 186.333   0
  -1  -7   2 1384.84 152.969   3
   1  -7  -2 1276.78 178.513   2
   1  -7  -2 901.720 119.466   3
  -1  -7   2 1087.98 157.015   2
   0  -7  -2 7221.99 233.337   3
   0  -7   2 7153.34 212.116   3
   0  -7  -2 7578.10 197.188   2
   0  -7   2 7185.51 212.595   2
   1  -7   2 16908.7 277.355   3
  -1  -7  -2 16191.4 278.896   3
   1  -7   2 16407.6 295.996   2
   1   7   2 16600.2 175.987   0
  -1  -7  -2 16599.3 220.314   2
   2  -7   2 12113.5 288.216   3
   2  -7   2 16077.8 381.614   2
   2  -7   2 11245.1 148.670   0
  -2  -7  -2 12029.8 175.397   2
   2   7   2 12125.4 174.762   0
   3   7   2 81790.6 425.863   0
   3  -7   2 77290.5 564.915   3
   3  -7   2 78341.3 570.348   2
  -3  -7  -2 79803.5 369.706   2
   3   7   2 77648.1 537.907   1
   3  -7   2 80709.6 397.502   0
   4   7   2 14560.0 360.438   1
   4   7   2 12397.9 230.516   0
   4  -7   2 13678.9 332.333   2
  -4  -7  -2 11642.0 175.355   2
   4  -7   2 13823.1 248.999   0
   4  -7   2 10061.3 242.924   3
  -5  -7  -2 22626.0 236.235   2
   5  -7   2 23984.1 331.564   0
   5   7   2 27024.6 450.212   1
   5  -7   2 25512.5 459.927   3
   5   7   2 22780.5 348.629   0
   6   7   2 8717.35 355.363   0
  -6  -7  -2 7283.49 170.052   2
   6  -7   2 8871.98 291.444   0
   6   7   2 8439.52 352.321   1
   6  -7   2 7090.93 281.889   3
   7  -7   2 17232.3 387.417   0
   7   7   2 16452.0 444.035   0
   7  -7   2 16689.1 477.850   3
   7   7   2 14813.6 379.640   1
  -7  -7  -2 14756.3 233.931   2
   8  -7   2 5527.18 344.689   0
   8  -7   2 5342.67 343.033   3
   8   7   2 4651.16 303.071   1
   8   7   2 5256.38 352.145   0
   9  -7   2 1694.11 193.872   0
   9  -7   2 1481.45 262.558   3
   9   7   2 1675.46 219.463   0
   9   7   2 1478.69 160.917   1
  10  -7   2 1055.85 227.652   3
  10  -7   2 759.679 196.088   0
  10   7   2 883.432 161.508   1
  10   7   2 753.653 165.210   0
  11  -7   2 3019.92 343.672   3
  11  -7   2 2234.29 223.607   0
  11   7   2 2464.76 294.613   0
  12  -7   2 9541.70 553.502   3
  12  -7   2 6637.33 386.011   0
  12   7   2 7155.22 447.002   0
  13   7   2 6283.05 484.778   0
  13  -7   2 6069.52 442.724   0
  13  -7   2 8664.17 498.501   3
  14  -7   2 857.283 340.994   3
  14  -7   2 199.191 170.895   0
  14   7   2 207.688 169.010   0
  15   7   2 316.097 206.767   0
  15  -7   2 178.665 204.834   0
  15  -7   2 272.830 197.705   3
  16   7   2 105.000 175.215   0
  16  -7   2 179.757 181.877   0
  17  -8  -2 1272.08 354.719   0
  17   8  -2 1289.99 361.882   0
  17  -8  -2 992.494 355.053   3
  16  -8  -2 576.239 302.595   0
  16   8  -2 811.659 302.348   0
  16  -8  -2 283.452 221.134   3
  15  -8  -2 284.288 207.955   0
  15  -8  -2 105.067 171.084   3
  15   8  -2 235.056 201.258   0
  14  -8  -2 2385.41 345.482   3
  14   8  -2 2747.81 358.649   0
  14  -8  -2 3310.65 323.908   0
  13  -8  -2 394.432 208.338   0
  13  -8  -2 591.841 188.852   3
  13   8  -2 654.238 273.188   0
  12  -8  -2 329.185 174.220   0
 -12  -8   2 208.350 136.149   2
  12   8  -2 171.616 163.092   0
  12  -8  -2 58.9378 132.434   3
  11   8  -2-15.3546 94.7693   0
  11  -8  -2 92.4894 116.468   3
 -11  -8   2 188.227 139.150   2
  11  -8  -2 36.8904 91.3606   0
  10   8  -2 2651.86 227.684   0
  10  -8  -2 2986.01 247.332   0
  10  -8  -2 3198.53 271.557   3
 -10  -8   2 3083.83 273.143   2
  -9  -8   2 2307.30 220.968   2
   9  -8  -2 3100.18 273.075   3
   9  -8  -2 1959.74 223.660   0
   9   8  -2 1765.00 169.921   0
   8  -8  -2 787.425 137.493   0
   8   8  -2 938.406 202.953   0
   8  -8  -2 668.645 210.071   3
  -8  -8   2 673.162 155.166   2
   7  -8  -2 1785.93 200.709   3
   7  -8  -2 2373.67 220.537   0
  -7  -8   2 1803.05 179.503   2
   7   8  -2 2436.61 226.026   0
   6  -8  -2 7859.25 297.042   3
   6   8  -2 9028.22 276.938   0
   6  -8  -2 8546.87 251.517   0
  -6  -8   2 7201.44 230.169   2
   5   8  -2 30308.0 364.472   0
   5  -8  -2 30323.7 335.228   0
  -5  -8   2 30474.3 407.869   2
   5  -8  -2 30058.6 466.282   3
   4  -8  -2 17085.9 221.481   0
   4  -8  -2 18116.2 313.157   3
   4   8  -2 17865.7 266.992   0
  -4  -8   2 17895.4 275.726   3
  -4  -8   2 19231.2 340.394   2
   3  -8  -2 1674.24 94.6949   0
  -3  -8   2 775.021 137.622   2
   3  -8  -2 1627.32 177.344   3
   3   8  -2 748.273 83.2956   0
  -3  -8   2 665.144 131.744   3
   2   8  -2 3123.05 107.659   0
   2  -8  -2 3405.22 118.608   0
   2  -8  -2 2885.48 170.101   3
  -2  -8   2 3445.26 160.612   3
  -2  -8   2 3498.08 224.207   2
  -1  -8   2 17046.9 295.227   3
  -1  -8   2 14344.3 274.319   2
   1  -8  -2 15356.3 347.102   3
   1  -8  -2 14761.3 279.781   2
   0  -8   2 62585.6 478.505   2
   0  -8  -2 63258.7 464.266   3
   0  -8   2 59199.7 405.936   3
   0  -8  -2 65643.5 425.774   2
  -1  -8  -2 558.473 110.407   3
   1  -8   2 535.832 160.390   2
   1   8   2 771.580 83.2203   0
  -1  -8  -2 776.141 131.412   2
   1  -8   2 474.448 113.025   3
  -2  -8  -2 5429.03 154.996   2
   2  -8   2 5999.95 201.639   3
   2   8   2 5858.16 133.737   0
  -2  -8  -2 6091.50 279.051   3
   2  -8   2 6627.64 147.242   0
   2  -8   2 7658.64 286.421   2
   3  -8   2 1015.90 177.973   3
   3  -8   2 1258.90 259.887   2
  -3  -8  -2 792.391 91.5962   2
   3  -8   2 983.251 108.640   0
   3   8   2 908.806 122.206   0
   4  -8   2 27769.1 447.253   2
   4  -8   2 27183.5 389.284   3
   4   8   2 29053.8 436.152   1
   4   8   2 29397.4 324.663   0
  -4  -8  -2 26925.3 266.709   2
   4  -8   2 28274.3 313.896   0
   5  -8   2 18679.0 469.329   2
   5   8   2 17703.2 416.268   1
   5  -8   2 17113.3 446.254   3
  -5  -8  -2 15172.8 222.700   2
   5   8   2 15921.9 336.507   0
   5  -8   2 17091.7 298.995   0
   6  -8   2 6927.36 273.295   0
   6  -8   2 6510.14 293.291   3
  -6  -8  -2 6186.94 182.830   2
   6   8   2 6893.06 307.807   0
   6   8   2 7166.61 388.351   1
   7   8   2 1893.88 214.824   0
   7  -8   2 1868.81 227.584   3
   7   8   2 2197.64 250.350   1
  -7  -8  -2 2067.59 138.128   2
   7  -8   2 2387.94 228.901   0
   8  -8   2 1669.73 292.701   3
   8  -8   2 1334.46 192.551   0
   8   8   2 1009.09 169.948   1
   8   8   2 1145.50 181.192   0
   9   8   2 1296.50 153.263   1
   9  -8   2 1570.20 233.675   3
   9   8   2 2238.82 282.982   0
   9  -8   2 1994.89 253.942   0
  10  -8   2 44.4740 81.4343   0
  10  -8   2-50.6856 94.6027   3
  10   8   2-5.83020 68.8388   0
  10   8   2-7.65621 63.3479   1
  11  -8   2 670.482 231.875   0
  11   8   2 447.701 178.592   0
  11  -8   2 190.274 175.839   3
  12   8   2 783.734 242.732   0
  12  -8   2 1842.15 368.191   3
  12  -8   2 749.978 181.667   0
  13  -8   2 1509.61 363.151   3
  13  -8   2 602.651 188.299   0
  13   8   2 583.607 202.849   0
  14  -8   2 268.909 159.845   3
  14   8   2 226.849 205.010   0
  14  -8   2 241.117 190.191   0
  15  -8   2 252.908 192.117   3
  15  -8   2 132.001 118.717   0
  15   8   2 83.3473 237.179   0
  16  -8   2 510.067 240.354   0
  16   8   2 448.833 269.116   0
  17  -9  -2 68.2501 159.438   0
  17   9  -2 134.965 197.261   0
  16   9  -2 268.322 260.644   0
  16  -9  -2 98.1492 171.137   3
  16  -9  -2 216.853 232.685   0
  15   9  -2 193.773 129.413   0
  15  -9  -2 316.749 197.380   0
  15  -9  -2 80.2121 194.331   3
  14  -9  -2 960.660 286.935   3
  14  -9  -2 887.072 268.229   0
  14   9  -2 1211.51 287.785   0
  13  -9  -2 2789.51 332.831   0
  13  -9  -2 1877.20 278.583   3
  13   9  -2 2870.96 309.345   0
  12  -9  -2 3400.95 374.399   3
  12   9  -2 3692.78 324.854   0
  12  -9  -2 3658.76 327.910   0
  11  -9  -2 1374.94 241.134   0
  11  -9  -2 782.676 205.450   3
  11   9  -2 991.438 211.471   0
 -11  -9   2 747.122 184.991   2
  10  -9  -2 515.694 245.003   3
 -10  -9   2 337.559 118.456   2
  10   9  -2 100.616 95.1977   0
  10  -9  -2 188.374 82.3879   0
   9  -9  -2 6993.94 304.246   0
   9   9  -2 6999.53 304.479   0
   9  -9  -2 8490.38 404.443   3
  -9  -9   2 7140.16 323.652   2
   8  -9  -2 2888.49 263.767   3
   8   9  -2 3047.24 264.814   0
   8  -9  -2 2969.27 201.033   0
  -8  -9   2 2905.48 235.066   2
   7   9  -2 1051.83 167.695   0
   7  -9  -2 1281.40 164.892   0
   7  -9  -2 1270.37 210.656   3
  -7  -9   2 831.971 165.312   2
   6   9  -2 18076.3 375.226   0
   6  -9  -2 18297.6 463.099   3
   6  -9  -2 17710.3 306.803   0
  -6  -9   2 17352.2 359.540   2
   5   9  -2 17634.8 282.889   0
  -5  -9   2 17294.4 372.492   2
   5  -9  -2 16897.6 390.741   3
   5  -9  -2 17189.1 283.709   0
   4   9  -2 4287.68 166.319   0
   4  -9  -2 4412.98 158.577   0
   4  -9  -2 3646.25 200.943   3
  -4  -9   2 4493.55 245.732   3
  -4  -9   2 4168.36 231.963   2
   3   9  -2 10005.1 183.479   0
  -3  -9   2 8915.47 241.649   3
  -3  -9   2 9601.62 285.790   2
   3  -9  -2 10188.0 173.503   0
   3  -9  -2 9493.02 292.913   3
   2  -9  -2 425.512 61.3884   0
   2   9  -2 259.817 37.2416   0
  -2  -9   2 832.099 141.144   3
   2  -9  -2 319.495 117.752   3
  -2  -9   2 1667.63 262.345   2
   1  -9  -2 25195.6 355.281   3
  -1  -9   2 23903.2 305.279   3
   1  -9  -2 25088.1 340.093   2
  -1  -9   2 23250.2 338.335   2
   1   9  -2 23593.3 152.128   0
   0  -9  -2 127.368 97.6468   2
   0  -9  -2 849.102 195.682   3
   0  -9   2 121.498 130.446   2
   0  -9   2 107.697 97.8916   3
  -1  -9  -2 3381.21 171.271   2
   1  -9   2 2834.88 146.656   3
   1  -9   2 3201.92 198.908   2
  -1  -9  -2 3397.60 230.306   3
  -2  -9  -2 2110.19 144.128   2
   2  -9   2 1926.31 168.345   3
  -2  -9  -2 2130.03 211.945   3
   2  -9   2 3118.85 300.735   2
   2  -9   2 2191.15 105.403   0
   2   9   2 2247.01 103.007   0
   3   9   2 4848.61 188.216   0
   3  -9   2 4249.71 158.271   0
  -3  -9  -2 4343.01 141.666   2
   3  -9   2 5065.01 325.730   2
   3  -9   2 4800.69 243.567   3
   4  -9   2 38950.8 341.959   0
   4   9   2 45674.3 637.308   1
   4  -9   2 36701.8 488.154   3
   4  -9   2 40405.8 582.186   2
  -4  -9  -2 36745.8 331.142   2
   4   9   2 38752.5 371.721   0
   5  -9   2 1680.21 175.342   0
   5   9   2 2403.40 297.933   1
   5  -9   2 794.284 190.625   3
   5  -9   2 1461.21 289.838   2
   5   9   2 1671.93 198.661   0
  -5  -9  -2 1678.17 140.089   2
   6   9   2 1742.46 294.816   1
   6  -9   2 1012.18 190.439   0
   6   9   2 972.487 188.919   0
  -6  -9  -2 760.553 109.058   2
   6  -9   2 568.146 147.967   3
   7  -9   2 1852.83 270.718   3
   7   9   2 2616.27 322.554   1
   7   9   2 1915.31 186.332   0
   7  -9   2 1907.36 186.718   0
   8   9   2 345.316 97.3120   1
   8  -9   2 508.258 153.005   3
   8   9   2 362.566 110.121   0
   8  -9   2 506.999 127.618   0
   9   9   2 342.368 138.547   1
   9   9   2 301.931 113.799   0
   9  -9   2 225.289 128.447   3
   9  -9   2 570.219 131.696   0
  10   9   2 43.2920 107.362   0
  10  -9   2-114.640 93.5901   3
  10   9   2-24.2202 51.7160   1
  10  -9   2 74.4171 82.3365   0
  11   9   2 1768.31 285.700   0
  11  -9   2 1745.47 242.498   0
  11  -9   2 1361.54 261.133   3
  11   9   2 1088.65 159.192   1
  12  -9   2 706.535 246.425   3
  12   9   2 390.599 183.753   0
  12  -9   2 511.078 246.995   0
  13  -9   2 748.618 282.924   3
  13  -9   2 312.931 194.906   0
  13   9   2 479.238 190.487   0
  14  -9   2 304.344 258.291   3
  14   9   2-3.88516 127.346   0
  14  -9   2 120.220 196.835   0
  15   9   2 219.088 196.367   0
  15  -9   2 245.238 177.004   0
  15  -9   2 460.452 324.914   3
  16  -9   2 343.842 184.970   0
  16   9   2 204.059 303.331   0
  16 -10  -2 35.9321 147.527   3
  16 -10  -2 213.318 199.912   0
  16  10  -2 112.511 177.380   0
  15  10  -2 565.120 280.052   0
  15 -10  -2 766.871 264.100   0
  15 -10  -2 354.589 237.165   3
  14 -10  -2 2041.51 340.972   0
  14 -10  -2 1599.94 365.960   3
  14  10  -2 2001.66 315.655   0
  13 -10  -2 10552.7 599.422   3
  13  10  -2 10374.1 481.851   0
  13 -10  -2 8240.64 406.231   0
  12 -10  -2 533.520 242.000   0
  12  10  -2 842.088 233.188   0
  12 -10  -2 776.900 260.970   3
  11  10  -2 57.4366 109.885   0
 -11 -10   2 95.2715 102.974   2
  11 -10  -2 29.4624 74.1543   0
  11 -10  -2-9.45607 74.9837   3
  10 -10  -2 68.7376 157.626   3
  10  10  -2 21.7482 82.7578   0
  10 -10  -2 57.7789 85.2059   0
 -10 -10   2 72.7128 91.3520   2
   9 -10  -2 1987.21 287.265   3
   9 -10  -2 1241.66 179.729   0
   9  10  -2 1237.52 165.463   0
  -9 -10   2 1573.32 262.273   2
   8  10  -2 80.2334 78.6814   0
   8 -10  -2 52.9181 75.6464   0
  -8 -10   2 98.2066 79.7377   2
   8 -10  -2 108.219 160.117   3
  -7 -10   2 4970.25 293.788   2
   7  10  -2 4759.66 233.556   0
   7 -10  -2 4249.09 198.657   0
   7 -10  -2 4833.90 343.509   3
   6 -10  -2 106.256 80.6281   3
   6  10  -2 38.6258 79.8372   0
   6 -10  -2 32.2296 51.2874   0
  -6 -10   2 39.3634 62.9987   2
   5 -10  -2 7132.44 340.797   3
  -5 -10   2 6437.19 290.081   2
   5 -10  -2 6462.94 215.979   0
   5  10  -2 6054.99 224.664   0
  -5 -10   2 6308.67 321.934   3
  -4 -10   2 47160.8 486.708   3
  -4 -10   2 49311.1 534.681   2
   4  10  -2 46503.9 364.545   0
   4 -10  -2 48058.9 323.763   0
   4 -10  -2 48055.5 524.463   3
   3 -10  -2 29455.5 214.845   0
   3 -10  -2 31142.8 415.844   3
  -3 -10   2 27954.0 358.343   3
  -3 -10   2 30205.7 422.251   2
   3  10  -2 30539.2 273.257   0
   2  10  -2 1962.87 91.4547   0
   2 -10  -2 2045.93 222.595   3
   2 -10  -2 2079.26 66.8047   0
  -2 -10   2 1914.82 156.588   3
  -2 -10   2 1807.06 173.116   2
  -1 -10   2 14263.0 320.918   2
   1 -10  -2 12216.3 92.1835   0
   1 -10  -2 14229.4 354.048   3
  -1 -10   2 14993.0 316.497   3
   1 -10  -2 14222.5 297.569   2
   1  10  -2 13488.7 106.196   0
   0 -10   2 1260.03 219.323   2
   0 -10   2 1137.47 118.413   3
   0 -10  -2 2534.86 271.712   3
   0 -10  -2 1320.36 156.219   2
   1 -10   2 2768.76 146.009   3
  -1 -10  -2 3428.75 218.713   3
  -1 -10  -2 3525.41 190.001   2
   1 -10   2 4091.30 260.742   2
   2 -10   2 25497.8 457.819   2
  -2 -10  -2 22180.7 326.508   2
  -2 -10  -2 20314.6 367.098   3
   2 -10   2 22217.9 401.265   3
   2  10   2 21279.3 210.411   0
   3 -10   2 54981.2 684.794   2
  -3 -10  -2 46252.6 526.981   3
  -3 -10  -2 51397.5 444.949   2
   3  10   2 51249.6 356.492   0
   3 -10   2 51370.1 324.340   0
   3 -10   2 45555.0 505.457   3
   4 -10   2 70.6893 73.5675   0
   4 -10   2 45.6967 96.8296   3
   4 -10   2 234.001 142.663   2
  -4 -10  -2 43.7307 53.0844   2
   4  10   2 35.8627 58.2307   0
   5  10   2 18771.1 337.779   0
   5 -10   2 18326.8 502.526   3
   5 -10   2 17671.8 292.524   0
   5 -10   2 18999.9 480.348   2
   5  10   2 22369.1 588.687   1
  -5 -10  -2 17837.4 285.757   2
   6 -10   2 1882.42 202.015   0
   6  10   2 2574.00 299.121   1
   6  10   2 2199.91 215.294   0
   6 -10   2 1632.90 228.875   3
   7  10   2 858.917 203.869   1
   7 -10   2 603.531 157.322   0
   7  10   2 291.667 86.9319   0
   7 -10   2 355.706 142.243   3
   8  10   2 5746.14 357.479   1
   8 -10   2 5893.50 405.393   3
   8  10   2 4857.63 243.140   0
   8 -10   2 6064.10 294.671   0
   9 -10   2 45.9521 98.4864   3
   9  10   2 99.3437 109.777   0
   9 -10   2 62.2568 72.4897   0
   9  10   2 99.2391 106.175   1
  10  10   2 2501.29 201.476   1
  10 -10   2 2401.20 220.031   3
  10  10   2 3287.16 295.059   0
  10 -10   2 3370.72 269.123   0
  11  10   2 656.729 223.692   0
  11 -10   2 478.996 209.716   3
  11 -10   2 711.458 151.292   0
  11  10   2 690.708 159.817   1
  12  10   2 3677.83 354.440   0
  12 -10   2 3626.15 375.714   3
  12 -10   2 3464.70 380.317   0
  13  10   2 446.693 235.760   0
  13 -10   2 600.813 288.938   3
  13 -10   2 577.341 231.281   0
  14 -10   2 269.643 202.069   3
  14  10   2 380.345 200.499   0
  14 -10   2 606.969 279.914   0
  15  10   2 74.6866 147.336   0
  15 -10   2 343.317 260.435   3
  16  11  -2 248.709 208.667   0
  16 -11  -2 119.537 181.711   3
  15 -11  -2 958.164 305.729   3
  15  11  -2 1761.14 352.987   0
  14  11  -2 364.009 193.059   0
  14 -11  -2 418.458 218.255   3
  13 -11  -2 407.032 230.725   3
  13  11  -2 665.858 243.608   0
  12 -11  -2 8496.87 568.287   3
  12  11  -2 8299.94 414.848   0
  11  11  -2 3142.12 286.406   0
  11 -11  -2 3864.17 295.936   0
  11 -11  -2 3315.69 385.686   3
 -10 -11   2 7293.16 347.399   2
  10  11  -2 5161.45 281.509   0
  10 -11  -2 5257.86 299.732   0
  10 -11  -2 7140.25 483.804   3
  -9 -11   2 1551.41 252.788   2
   9 -11  -2 397.222 85.4547   0
   9 -11  -2 1953.91 358.007   3
   9  11  -2 502.255 97.2012   0
   8  11  -2 3050.43 204.392   0
   8 -11  -2 3134.66 245.049   0
  -8 -11   2 3901.58 289.714   2
   8 -11  -2 3147.62 275.300   3
   7 -11  -2 134.823 148.565   3
   7  11  -2 18.9149 59.0204   0
   7 -11  -2-50.1473 49.5068   0
  -7 -11   2 127.160 145.691   2
   6  11  -2 7870.04 242.448   0
  -6 -11   2 7999.21 326.242   2
   6 -11  -2 8514.90 250.281   0
   6 -11  -2 9126.17 423.411   3
  -6 -11   2 8972.04 365.009   3
  -5 -11   2 22385.7 452.468   2
   5 -11  -2 26965.7 551.426   3
   5  11  -2 21647.9 313.218   0
  -5 -11   2 22169.9 411.594   3
   4 -11  -2 5605.73 330.779   3
  -4 -11   2 3797.27 214.500   3
   4  11  -2 3933.09 157.887   0
  -4 -11   2 3794.84 239.322   2
  -3 -11   2 2681.88 197.249   3
   3  11  -2 2568.19 113.234   0
   3 -11  -2 2614.74 252.135   3
  -3 -11   2 2898.30 254.322   2
  -2 -11   2 17007.5 380.251   3
   2 -11  -2 15976.4 430.088   3
  -2 -11   2 13840.0 306.537   2
   2  11  -2 14858.2 147.556   0
  -1 -11   2 22415.7 383.881   2
   1 -11  -2 25063.6 397.281   2
   1 -11  -2 29993.7 551.658   3
  -1 -11   2 25389.0 384.349   3
   0 -11   2 10374.7 302.448   3
   0 -11  -2 10378.2 340.564   3
   0 -11   2 10133.7 358.651   2
   0 -11  -2 11283.8 330.119   2
  -1 -11  -2 5705.75 303.904   3
  -1 -11  -2 6445.37 291.009   2
   1 -11   2 7885.26 345.857   2
   1 -11   2 4892.29 230.163   3
   2 -11   2 34582.9 487.235   3
   2 -11   2 41472.9 612.559   2
   2  11   2 31250.3 244.342   0
  -2 -11  -2 34361.5 401.230   2
  -2 -11  -2 32810.0 566.779   3
   3 -11   2 2967.26 317.146   2
   3  11   2 2165.33 132.288   0
   3 -11   2 2547.91 272.327   3
  -3 -11  -2 2825.36 198.971   2
  -3 -11  -2 1892.50 163.529   3
   4  11   2 15376.1 274.585   0
   4 -11   2 15156.3 424.673   3
  -4 -11  -2 14431.5 303.573   2
   4 -11   2 14439.5 481.086   2
  -4 -11  -2 13855.1 369.681   3
   5 -11   2 5881.42 386.105   3
   5  11   2 8828.19 520.001   1
   5 -11   2 5419.81 226.235   0
   5 -11   2 6135.46 424.726   2
   5  11   2 5822.41 260.418   0
  -5 -11  -2 5182.78 227.504   2
   6  11   2 328.503 158.036   1
   6 -11   2 71.9265 77.6650   0
   6 -11   2 16.3910 72.0887   3
   6  11   2 41.4062 62.4547   0
   7  11   2 1984.52 346.282   1
   7 -11   2 619.272 153.749   0
   7 -11   2 405.673 206.569   3
   7  11   2 792.477 178.833   0
   8  11   2 7197.39 446.522   1
   8 -11   2 6826.17 307.618   0
   8  11   2 5313.44 253.844   0
   8 -11   2 8451.67 492.371   3
   9 -11   2 12189.1 394.331   0
   9 -11   2 11563.1 613.940   3
   9  11   2 9974.88 419.259   0
   9  11   2 11259.9 547.468   1
  10  11   2 453.320 160.733   1
  10 -11   2 681.497 193.640   0
  10  11   2 608.017 158.453   0
  10 -11   2 538.330 210.295   3
  11 -11   2 3958.66 486.130   3
  11  11   2 4044.39 387.674   0
  11  11   2 3469.67 332.533   1
  12 -11   2 443.464 256.597   3
  12  11   2 152.564 150.725   0
  13 -11   2 757.219 267.724   3
  13  11   2 1021.14 288.947   0
  14 -11   2 238.142 191.171   3
  14  11   2 519.429 225.639   0
  15  11   2 129.652 168.177   0
  15  12  -2 209.852 200.563   0
  15 -12  -2 142.109 122.941   3
  14 -12  -2 1417.25 376.001   3
  14  12  -2 1292.99 273.572   0
  13  12  -2 2126.16 307.207   0
  13 -12  -2 1353.83 297.465   3
  12  12  -2 385.223 166.058   0
  12 -12  -2 469.725 231.242   3
  11 -12  -2 125.510 125.561   3
  11  12  -2 66.2742 108.155   0
  10  12  -2 78.6095 95.1908   0
  10 -12  -2 1041.50 331.727   3
 -10 -12   2 565.616 180.830   2
   9 -12  -2 8635.70 450.847   3
  -9 -12   2 8548.57 336.414   2
   9  12  -2 6059.15 277.082   0
   8  12  -2 1092.14 115.345   0
   8 -12  -2 1894.03 328.160   3
  -8 -12   2 1783.80 223.358   2
   7 -12  -2 1782.24 248.970   3
  -7 -12   2 2175.95 252.451   3
  -7 -12   2 2229.56 218.595   2
   7  12  -2 2299.86 228.730   0
   6 -12  -2 1781.52 257.320   3
   6  12  -2 1928.78 141.966   0
  -6 -12   2 2219.87 252.373   3
  -6 -12   2 2077.49 261.839   2
  -5 -12   2 1492.42 220.740   3
  -5 -12   2 1382.31 191.031   2
   5 -12  -2 2250.87 273.302   3
   4 -12  -2 14140.7 472.374   3
  -4 -12   2 11337.9 396.255   2
  -4 -12   2 10829.3 336.342   3
  -3 -12   2 7964.58 316.272   3
  -3 -12   2 6418.91 228.432   2
   3 -12  -2 8133.02 371.424   3
   2 -12  -2 16336.3 484.334   3
  -2 -12   2 12650.5 307.505   2
  -2 -12   2 14917.7 372.927   3
  -1 -12   2 1856.88 253.096   3
   1 -12  -2 1922.42 266.288   3
   1 -12  -2 1109.29 123.261   2
  -1 -12   2 1406.30 222.125   2
   0 -12   2 7158.24 271.231   3
   0 -12  -2 7291.25 315.828   2
   0 -12   2 9584.25 431.531   2
   0 -12  -2 7960.63 356.879   3
   1 -12   2 15831.7 340.336   3
   1 -12   2 22554.2 520.956   2
  -1 -12  -2 20509.4 507.606   3
  -1 -12  -2 20075.5 426.829   2
  -2 -12  -2 8942.26 413.810   3
  -2 -12  -2 10626.2 305.493   2
   2 -12   2 8946.75 398.782   2
   2 -12   2 9100.36 356.776   3
   3 -12   2 4628.48 370.827   2
   3 -12   2 3902.90 251.376   3
  -3 -12  -2 4403.11 246.767   2
  -3 -12  -2 4353.05 320.654   3
  -4 -12  -2 323.057 251.165   3
   4 -12   2 177.907 184.132   2
  -4 -12  -2 39.3256 54.8638   2
   4  12   2 82.8566 51.4228   0
   4 -12   2 226.739 172.139   3
   5  12   2 3735.36 374.125   1
   5 -12   2 1795.84 341.332   2
   5 -12   2 1820.58 267.844   3
   5  12   2 1593.08 149.751   0
  -5 -12  -2 1844.21 273.672   3
  -5 -12  -2 1486.48 155.096   2
   6  12   2 1449.69 166.285   0
   6  12   2 2808.66 344.894   1
   6 -12   2 1160.36 208.874   3
   7  12   2 11959.4 572.212   1
   7  12   2 8376.99 334.951   0
   7 -12   2 9133.68 426.619   3
   8 -12   2 15722.2 582.190   3
   8  12   2 14002.3 553.042   1
   8  12   2 14838.4 434.403   0
   9  12   2 172.986 174.414   1
   9  12   2 222.766 138.284   0
   9 -12   2 244.142 195.046   3
  10 -12   2 2434.81 335.545   3
  10  12   2 2899.40 300.897   0
  10  12   2 2784.31 315.526   1
  11  12   2 740.993 231.965   1
  11 -12   2 616.535 249.875   3
  11  12   2 387.105 162.761   0
  12  12   2 2438.28 325.133   0
  12 -12   2 2339.10 325.731   3
  13 -12   2 111.119 166.141   3
  13  12   2 92.7783 161.745   0
  14 -12   2 211.244 250.091   3
  14  12   2 111.635 131.837   0
  15 -13  -2 304.113 228.996   3
  14 -13  -2 286.482 231.269   3
  13 -13  -2 397.525 195.768   3
  12 -13  -2 358.511 170.635   3
  11 -13  -2 1848.90 270.398   3
  10 -13  -2 7570.95 511.146   3
  -9 -13   2 3740.61 306.011   2
   9 -13  -2 2848.33 338.508   3
   8 -13  -2 363.102 257.565   3
  -8 -13   2 217.811 144.038   3
  -8 -13   2 120.803 145.697   2
  -7 -13   2 107.642 116.336   3
   7 -13  -2-22.3605 68.1053   3
  -7 -13   2 93.8537 97.3591   2
  -6 -13   2 1767.46 220.236   3
  -6 -13   2 1878.84 248.038   2
   6 -13  -2 1735.08 218.889   3
   5 -13  -2 2206.07 252.490   3
  -5 -13   2 1849.16 222.867   2
  -5 -13   2 1979.24 219.252   3
  -4 -13   2 343.612 148.691   2
  -4 -13   2 393.538 185.913   3
   4 -13  -2 448.001 171.219   3
  -3 -13   2 1504.06 229.899   3
  -3 -13   2 1127.24 147.158   2
   3 -13  -2 1339.80 221.425   3
  -2 -13   2 87.3770 95.0301   2
   2 -13  -2 116.611 116.667   3
  -2 -13   2 319.545 151.125   3
  -1 -13   2 19244.4 452.234   3
  -1 -13   2 18286.0 515.904   2
   1 -13  -2 19356.0 484.841   3
   1 -13  -2 15024.8 340.817   2
   0 -13   2 15817.3 415.276   3
   0 -13  -2 18426.6 453.070   2
   0 -13  -2 24521.5 558.925   3
   0 -13   2 20907.9 608.710   2
  -1 -13  -2 493.383 184.970   2
  -1 -13  -2 1685.81 293.736   3
   1 -13   2 211.390 186.786   2
   1 -13   2-99.4929 83.9910   3
  -2 -13  -2 153.597 144.825   3
   2 -13   2 16.5938 104.934   2
  -2 -13  -2 77.5376 87.9043   2
   2 -13   2 274.295 199.660   3
  -3 -13  -2 1557.30 293.011   3
   3 -13   2 1562.26 270.222   2
   3 -13   2 1828.75 266.186   3
  -3 -13  -2 1854.59 183.266   2
   4 -13   2 7633.58 372.040   3
  -4 -13  -2 8860.07 435.862   3
   4 -13   2 9026.85 552.519   2
  -4 -13  -2 8090.56 272.504   2
  -5 -13  -2 161.354 146.335   3
   5 -13   2 144.223 156.576   2
   5  13   2 1166.43 334.521   1
   5 -13   2 153.662 141.696   3
   6 -13   2 124.503 121.196   3
   6  13   2 269.319 215.966   1
  -6 -13  -2 130.305 117.788   3
   7 -13   2 635.745 281.821   3
   7  13   2 952.373 257.237   1
   8 -13   2 3151.78 392.405   3
   8  13   2 2834.98 374.691   1
   9  13   2 10052.4 527.967   1
   9 -13   2 10595.7 522.096   3
  10  13   2 93.4493 110.269   1
  10 -13   2 143.367 168.393   3
  11 -13   2 890.260 259.193   3
  11  13   2 725.063 232.767   1
  12 -13   2 404.214 197.886   3
  13 -13   2 626.998 270.318   3
  14 -13   2 421.367 255.950   3
  14 -14  -2 421.295 299.714   3
  13 -14  -2 544.470 239.556   3
  12 -14  -2 68.7898 148.998   3
  11 -14  -2 305.698 190.972   3
  10 -14  -2 234.197 175.607   3
  -9 -14   2 172.751 128.481   2
  -9 -14   2 182.841 130.204   3
   9 -14  -2 242.106 225.802   3
   8 -14  -2 4483.44 424.501   3
  -8 -14   2 3256.99 279.931   2
  -8 -14   2 3844.81 328.272   3
   7 -14  -2 211.239 171.216   3
  -7 -14   2 48.0816 95.1304   3
  -7 -14   2 64.7221 84.1877   2
  -6 -14   2 508.879 251.626   3
  -6 -14   2 457.655 149.219   2
   6 -14  -2 375.400 149.573   3
   5 -14  -2 233.784 164.091   3
  -5 -14   2 197.206 149.270   2
  -5 -14   2 203.810 132.793   3
   4 -14  -2 1380.36 229.404   3
  -4 -14   2 1506.21 227.118   3
  -4 -14   2 1675.55 232.464   2
  -3 -14   2 768.100 176.755   3
  -3 -14   2 289.280 111.518   2
   3 -14  -2 575.956 199.557   3
  -2 -14   2 3376.08 334.443   3
  -2 -14   2 2851.89 268.344   2
   2 -14  -2 3285.57 278.772   3
   1 -14  -2 9326.84 400.112   2
   1 -14  -2 12188.2 510.766   3
  -1 -14   2 10971.5 488.970   2
  -1 -14   2 10714.7 390.334   3
   0 -14   2 191.082 227.839   2
   0 -14  -2 226.975 166.507   3
   0 -14  -2 462.800 207.897   2
   0 -14   2 2.00601 52.6577   3
   1 -14   2 1550.30 355.881   2
  -1 -14  -2 1409.29 269.155   3
   1 -14   2 765.704 164.499   3
  -1 -14  -2 1401.28 237.807   2
  -2 -14  -2-16.1247 63.7538   3
  -2 -14  -2 133.467 97.2845   2
   2 -14   2 168.467 193.212   2
   2 -14   2 140.762 90.1135   3
   3 -14   2 4467.64 268.611   3
   3 -14   2 5081.07 347.093   2
  -3 -14  -2 4742.30 332.368   3
  -3 -14  -2 5971.89 283.630   2
   4 -14   2 465.738 226.321   2
  -4 -14  -2 237.033 113.874   2
   4 -14   2 58.0149 117.091   3
  -4 -14  -2 55.8256 99.1272   3
   5 -14   2 1036.73 319.729   2
   5 -14   2 616.042 208.892   3
   5  14   2 1430.19 279.899   1
  -5 -14  -2 718.277 225.887   3
  -6 -14  -2 33.7933 111.398   3
   6 -14   2 33.3328 84.4958   3
   6  14   2 529.123 303.290   1
   7  14   2 1796.57 352.448   1
  -7 -14  -2 702.644 199.619   3
   7 -14   2 1044.72 242.530   3
   8  14   2 4130.30 430.024   1
   8 -14   2 4408.01 372.878   3
   9  14   2 341.175 216.033   1
   9 -14   2 155.356 169.195   3
  10  14   2 538.715 247.824   1
  10 -14   2 546.758 261.540   3
  11  14   2 134.246 174.677   1
  11 -14   2 187.658 161.072   3
  12 -14   2 1149.11 345.580   3
  13 -14   2 349.556 256.569   3
  13 -15  -2 118.214 259.544   3
  12 -15  -2 248.445 205.591   3
 -11 -15   2 0.57767 173.634   3
  11 -15  -2 289.398 214.165   3
  10 -15  -2 1100.59 311.802   3
 -10 -15   2 752.870 238.121   3
  -9 -15   2 6118.60 370.532   3
   9 -15  -2 4966.07 447.154   3
  -8 -15   2 3441.95 313.897   3
  -8 -15   2 3610.23 341.742   2
   8 -15  -2 4475.16 399.352   3
  -7 -15   2 192.887 126.979   2
  -7 -15   2 124.940 123.628   3
   7 -15  -2 180.911 155.753   3
   6 -15  -2 1281.10 257.188   3
  -6 -15   2 1546.37 229.175   2
  -6 -15   2 1505.67 202.047   3
  -5 -15   2 3365.80 275.259   2
  -5 -15   2 3984.57 352.724   3
   5 -15  -2 3953.06 416.937   3
  -4 -15   2 343.442 153.166   2
  -4 -15   2 317.566 127.824   3
   4 -15  -2 205.128 173.114   3
  -3 -15   2 3781.78 331.340   2
   3 -15  -2 3024.37 253.601   3
  -3 -15   2 3166.74 251.912   3
   2 -15  -2 610.628 192.705   3
  -2 -15   2 805.428 218.816   2
  -2 -15   2 564.054 167.441   3
   1 -15  -2 139.193 136.038   2
  -1 -15   2 222.784 149.229   3
   1 -15  -2 524.985 305.522   3
  -1 -15   2 514.527 239.605   2
   0 -15   2 4658.78 354.747   3
   0 -15  -2 5044.44 338.604   3
   0 -15   2 4944.83 344.799   2
   0 -15  -2 4518.07 348.175   2
   1 -15   2 10733.6 408.621   3
  -1 -15  -2 13920.6 519.107   3
  -1 -15  -2 11734.9 402.703   2
   1 -15   2 12248.1 494.461   2
  -2 -15  -2 2690.34 257.380   2
  -2 -15  -2 2408.54 284.607   3
   2 -15   2 2459.57 302.441   2
   2 -15   2 2843.27 347.601   3
  -3 -15  -2 287.059 169.306   3
   3 -15   2 185.316 147.330   3
  -3 -15  -2 173.860 135.865   2
   3 -15   2 209.668 225.744   2
   4 -15   2 3415.51 299.557   3
   4 -15   2 4541.42 383.549   2
  -4 -15  -2 3711.00 306.859   3
   5 -15   2 371.748 239.341   2
  -5 -15  -2 74.6961 111.083   3
   5  15   2 736.443 246.688   1
   5 -15   2 55.5292 82.6716   3
   6  15   2 1679.88 379.848   1
  -6 -15  -2 345.165 193.491   3
   6 -15   2 184.083 118.211   3
   7  15   2 6082.18 481.857   1
  -7 -15  -2 4016.90 326.365   3
   7 -15   2 5374.06 451.303   3
  -8 -15  -2-15.6854 116.253   3
   8  15   2 276.194 258.204   1
   8 -15   2 111.210 155.872   3
   9  15   2 611.532 277.996   1
   9 -15   2 137.855 136.720   3
  10 -15   2 287.376 157.331   3
  10  15   2 650.770 231.386   1
  11  15   2 100.038 160.649   1
  11 -15   2 204.165 180.188   3
  12 -15   2 90.6318 201.323   3
  13 -15   2 119.531 155.395   3
  13 -16  -2 110.425 206.402   3
  12 -16  -2 178.641 201.281   3
 -11 -16   2 229.788 182.758   3
  11 -16  -2 201.018 179.349   3
 -10 -16   2 2257.20 298.159   3
  10 -16  -2 3870.81 409.585   3
   9 -16  -2 523.823 252.459   3
  -9 -16   2 594.440 236.004   3
  -8 -16   2 1571.76 290.073   3
   8 -16  -2 1663.53 344.649   3
  -7 -16   2 1747.21 218.897   2
   7 -16  -2 2407.62 299.834   3
  -7 -16   2 2137.42 281.351   3
   6 -16  -2 1266.03 246.917   3
  -6 -16   2 1060.95 207.573   3
  -6 -16   2 648.838 144.969   2
  -5 -16   2 7851.03 412.403   3
  -5 -16   2 6938.73 368.051   2
   5 -16  -2 7731.81 478.807   3
  -4 -16   2 496.032 192.334   3
   4 -16  -2 903.373 254.565   3
  -4 -16   2 398.357 126.401   2
  -3 -16   2 101.484 130.649   2
  -3 -16   2-18.3825 60.3599   3
   3 -16  -2-16.8207 101.008   3
   2 -16  -2 2003.26 218.050   3
  -2 -16   2 2500.63 303.439   2
  -2 -16   2 1845.91 258.612   3
  -1 -16   2 6195.63 423.195   2
  -1 -16   2 5128.66 381.871   3
   1 -16  -2 4841.66 369.499   3
   1 -16  -2 5799.24 338.862   2
   0 -16  -2 14620.2 446.510   2
   0 -16  -2 13785.4 452.705   3
   0 -16   2 13402.4 480.849   3
   0 -16   2 14637.3 527.433   2
  -1 -16  -2 897.435 237.216   2
  -1 -16  -2 1615.66 352.276   3
   1 -16   2 827.407 257.457   3
   1 -16   2 296.824 211.467   2
   2 -16   2 785.065 280.244   3
  -2 -16  -2 595.870 207.068   3
  -2 -16  -2 317.477 116.157   2
   2 -16   2 335.032 120.981   2
   3 -16   2 76.4675 119.618   2
  -3 -16  -2 228.791 156.932   3
   3 -16   2 221.039 177.529   3
  -4 -16  -2 4424.29 397.401   3
   4 -16   2 4916.71 419.147   2
   4 -16   2 3776.28 300.467   3
   5 -16   2 2299.81 336.488   2
   5  16   2 3460.57 353.756   1
  -5 -16  -2 1649.52 300.860   3
   5 -16   2 1511.71 274.645   3
   6  16   2 5713.26 476.014   1
  -6 -16  -2 2605.50 353.509   3
   6 -16   2 2088.09 254.711   3
   7  16   2 768.615 349.121   1
  -7 -16  -2 161.090 167.373   3
   7 -16   2 235.012 229.584   3
   8  16   2 1946.57 387.206   1
   8 -16   2 1422.49 352.639   3
  -8 -16  -2 1086.15 226.031   3
  -9 -16  -2 593.156 214.846   3
   9 -16   2 812.618 281.090   3
   9  16   2 749.655 267.147   1
  10  16   2 189.989 178.645   1
 -10 -16  -2 193.982 171.729   3
  10 -16   2 68.6032 149.138   3
  11 -16   2 193.646 216.469   3
  11  16   2 229.858 215.129   1
  12 -16   2 228.531 235.079   3
  12 -17  -2 119.342 173.599   3
  11 -17  -2 762.267 326.460   3
 -10 -17   2 127.232 171.788   3
  10 -17  -2 413.195 212.740   3
   9 -17  -2 2708.93 400.734   3
  -9 -17   2 2986.13 346.037   3
   8 -17  -2 3404.08 402.954   3
  -8 -17   2 2869.09 282.367   3
   7 -17  -2 478.215 244.571   3
  -7 -17   2 111.487 133.995   2
  -7 -17   2 269.901 137.032   3
  -6 -17   2 171.642 104.970   2
  -6 -17   2 318.546 183.909   3
   6 -17  -2 585.427 296.487   3
  -5 -17   2 228.935 163.354   2
   5 -17  -2 894.473 281.484   3
  -5 -17   2 357.113 190.864   3
   4 -17  -2 2722.17 415.392   3
  -4 -17   2 1825.40 287.094   3
  -4 -17   2 2279.06 338.549   2
  -3 -17   2 750.763 275.791   2
   3 -17  -2 407.086 173.072   3
  -3 -17   2 366.296 204.187   3
  -2 -17   2 7307.14 406.619   3
   2 -17  -2 6829.57 410.998   3
  -2 -17   2 8213.40 455.645   2
   1 -17  -2 4998.04 410.303   3
  -1 -17   2 4602.58 332.378   3
   1 -17  -2 5513.06 306.135   2
  -1 -17   2 5657.98 369.325   2
   0 -17  -2 204.524 149.185   2
   0 -17   2 246.354 168.381   2
   0 -17  -2 65.4987 129.822   3
   0 -17   2 44.0775 91.7809   3
   1 -17   2 3630.48 337.243   2
  -1 -17  -2 4268.77 348.275   2
  -1 -17  -2 3718.08 376.625   3
   1 -17   2 4897.85 400.407   3
   2 -17   2 1371.06 263.100   3
  -2 -17  -2 1050.34 265.628   3
   2 -17   2 284.639 170.984   2
  -2 -17  -2 673.782 145.825   2
   3 -17   2 3662.34 355.208   3
   3 -17   2 3430.06 423.103   2
  -3 -17  -2 3607.01 435.636   3
   4 -17   2 1913.10 345.788   3
   4 -17   2 2587.19 347.516   2
  -4 -17  -2 1681.26 330.638   3
   5 -17   2 3581.29 422.360   3
  -5 -17  -2 4038.20 363.800   3
   5  17   2 7985.69 519.446   1
   6 -17   2-44.3492 105.015   3
   6  17   2 837.910 299.461   1
  -6 -17  -2 64.0547 125.238   3
   7  17   2 4931.90 490.768   1
   7 -17   2 1044.47 281.128   3
  -7 -17  -2 3491.51 370.844   3
   8  17   2 1990.85 395.232   1
  -8 -17  -2 1827.89 389.971   3
   8 -17   2 1320.28 307.871   3
  -9 -17  -2 122.619 129.861   3
   9 -17   2 146.069 180.341   3
   9  17   2 259.148 176.391   1
  10 -17   2-0.88528 82.3782   3
  10  17   2 173.007 236.251   1
 -10 -17  -2 106.507 179.504   3
  11  17   2 227.927 232.657   1
 -11 -17  -2 216.521 207.774   3
  11 -17   2 99.4796 196.227   3
 -12 -17  -2 864.912 325.012   3
  11  18  -2 1694.28 357.767   1
  11 -18  -2 558.430 267.080   3
  10 -18  -2 922.882 298.131   3
  -9 -18   2 278.004 199.224   3
   9 -18  -2 9.26030 120.707   3
   8 -18  -2 2095.23 364.392   3
  -8 -18   2 1712.04 348.371   3
  -7 -18   2 1433.17 278.823   3
   7 -18  -2 1679.88 347.771   3
  -6 -18   2 3604.05 337.164   3
   6 -18  -2 3834.20 446.515   3
  -6 -18   2 3043.82 341.879   2
   5 -18  -2 6703.60 419.808   3
  -5 -18   2 7149.54 375.752   3
  -5 -18   2 5740.62 440.558   2
  -4 -18   2 177.734 115.958   3
   4 -18  -2 494.923 222.851   3
  -4 -18   2 386.534 188.365   2
  -3 -18   2 445.845 204.195   2
   3 -18  -2 389.381 218.101   3
  -3 -18   2 395.119 176.743   3
  -2 -18   2 284.343 178.365   2
  -2 -18   2 156.620 115.225   3
   2 -18  -2 180.631 231.460   3
  -1 -18   2 3782.54 397.305   3
  -1 -18   2 3414.05 318.754   2
   1 -18  -2 4226.08 439.238   3
   0 -18   2 1070.05 237.347   3
   0 -18  -2 1736.24 271.013   2
   0 -18   2 1358.57 277.192   2
   0 -18  -2 1497.55 307.758   3
  -1 -18  -2-6.67973 75.1375   2
   1 -18   2 50.2316 109.832   2
   1 -18   2 157.239 117.560   3
  -1 -18  -2 89.2684 136.648   3
   2 -18   2 279.027 207.905   3
  -2 -18  -2 190.034 132.921   3
   2 -18   2 457.987 223.632   2
   3 -18   2 1006.19 264.662   3
  -3 -18  -2 911.796 256.657   3
   3 -18   2 1819.80 427.237   2
   4  18   2 15251.9 614.575   1
  -4 -18  -2 10506.6 509.508   3
   4 -18   2 14738.4 627.550   2
   4 -18   2 9930.39 461.663   3
   5 -18   2 1232.25 294.470   3
   5  18   2 2861.32 379.409   1
  -5 -18  -2 1002.74 256.817   3
   6  18   2 1844.05 345.588   1
   6 -18   2 606.901 198.013   3
  -6 -18  -2 590.265 203.427   3
   7  18   2 214.297 249.198   1
  -7 -18  -2 158.073 160.016   3
   7 -18   2 4.00049 119.278   3
  -8 -18  -2 665.887 229.707   3
   8 -18   2 353.242 227.494   3
   8  18   2 773.233 295.353   1
  -9 -18  -2 1004.90 315.480   3
   9 -18   2 887.955 279.377   3
   9  18   2 981.643 263.987   1
  10  18   2 91.8035 185.411   1
 -10 -18  -2 120.593 157.165   3
  10 -18   2 207.933 227.252   3
  11  18   2 181.266 210.163   1
 -11 -18  -2 151.151 150.041   3
  11  19  -2 418.472 291.999   1
  10 -19  -2 350.169 246.407   3
   9 -19  -2 80.8692 143.106   3
  -9 -19   2 202.330 229.345   3
  -8 -19   2 178.463 158.285   3
   8 -19  -2 139.549 200.286   3
   7 -19  -2 194.472 196.218   3
  -7 -19   2 85.8216 128.899   3
   6 -19  -2 356.123 231.949   3
  -6 -19   2 451.186 162.267   3
   5 -19  -2 147.802 161.725   3
  -5 -19   2 399.601 186.138   3
  -5 -19   2 123.160 166.325   2
  -4 -19   2 852.789 234.466   2
  -4 -19   2 1217.99 249.801   3
   4 -19  -2 2060.83 413.181   3
  -3 -19   2 228.335 138.274   3
   3 -19  -2 246.019 135.282   3
  -3 -19   2 199.357 128.285   2
  -2 -19   2 633.984 246.981   2
   2 -19  -2 386.354 173.814   3
  -2 -19   2 475.931 183.560   3
   1 -19  -2 82.1516 137.023   3
  -1 -19   2 32.7837 118.776   2
  -1 -19   2 19.7343 100.987   3
   0 -19   2 954.951 213.867   3
   0 -19  -2 1295.41 211.843   2
   0 -19  -2 1403.32 322.296   3
   0 -19   2 1453.66 319.586   2
  -1 -19  -2 218.280 134.253   2
   1 -19   2 230.865 168.533   2
  -1 -19  -2 467.645 182.299   3
   1 -19   2 414.699 202.715   3
   2 -19   2 209.531 195.081   3
   2 -19   2 608.727 224.458   2
  -2 -19  -2 521.147 183.476   3
  -3 -19  -2 3169.52 364.122   3
   3 -19   2 2436.38 390.600   3
   3 -19   2 3012.06 353.529   2
   4 -19   2 258.424 210.458   3
   4 -19   2 526.356 189.280   2
  -4 -19  -2 369.647 224.427   3
   4  19   2 560.497 309.082   1
   5  19   2 589.157 220.313   1
  -5 -19  -2 430.740 210.244   3
   5 -19   2 376.945 182.923   3
   6  19   2 177.492 224.082   1
  -6 -19  -2 118.307 158.071   3
   6 -19   2 109.307 162.341   3
  -7 -19  -2 725.463 303.332   3
   7 -19   2 268.281 183.211   3
   7  19   2 1779.11 438.502   1
   8  19   2 923.905 336.359   1
  -8 -19  -2 432.587 262.052   3
   8 -19   2 452.287 263.377   3
   9  19   2 435.435 230.209   1
  -9 -19  -2 117.180 152.817   3
   9 -19   2 150.425 217.692   3
  10  19   2 112.388 186.248   1
 -10 -19  -2 119.784 153.469   3
  11  19   2 55.7556 156.534   1
   9 -20  -2 119.099 186.525   3
  -8 -20   2 167.387 166.212   3
   8 -20  -2 0.69493 118.754   3
   7 -20  -2 13.3934 136.186   3
  -7 -20   2 58.8939 159.748   3
   6 -20  -2 50.3411 130.354   3
  -6 -20   2 129.302 113.285   3
   5 -20  -2 1758.96 400.299   3
  -5 -20   2 1846.68 341.579   3
  -5 -20   2 825.517 227.574   2
  -4 -20   2 1812.94 361.174   3
   4 -20  -2 1542.00 392.313   3
  -4 -20   2 2076.05 367.144   2
  -3 -20   2 110.031 138.904   2
   3 -20  -2 68.3142 165.912   3
  -3 -20   2 121.331 123.072   3
   2 -20  -2 132.317 175.953   3
  -2 -20   2 14.0937 94.5918   3
  -2 -20   2 82.9669 128.500   2
   1 -20  -2 1203.04 339.498   3
  -1 -20   2 519.784 176.469   3
  -1 -20   2 963.189 282.635   2
   0 -20   2 128.215 130.240   3
   0 -20  -2 349.300 206.903   3
   0 -20   2 207.676 199.509   2
   1 -20   2-7.87238 100.753   3
  -1 -20  -2 63.8129 106.307   3
   1 -20   2 52.2261 114.313   2
  -2 -20  -2 523.557 251.363   3
   2 -20   2 793.705 306.190   2
   2 -20   2 443.187 255.712   3
   3  20   2 479.734 349.939   1
   3 -20   2 45.1380 110.479   3
  -3 -20  -2 362.354 208.191   3
   3 -20   2 704.551 326.676   2
   4  20   2 477.624 224.549   1
   4 -20   2 425.556 211.489   2
   4 -20   2 45.6150 148.798   3
  -4 -20  -2 308.798 157.217   3
   5  20   2 818.870 315.258   1
  -5 -20  -2 261.199 199.913   3
   5 -20   2 234.655 181.846   3
  -6 -20  -2 75.8790 163.225   3
   6 -20   2 133.374 170.338   3
   6  20   2 288.491 225.282   1
   7  20   2 527.132 256.103   1
  -7 -20  -2 147.203 156.666   3
   7 -20   2 174.953 171.211   3
   8 -20   2 305.971 204.941   3
   8  20   2 792.206 261.633   1
  -8 -20  -2 698.340 241.068   3
   9  20   2 167.786 165.714   1
  -9 -20  -2 240.705 197.171   3
   9 -20   2 58.5665 140.557   3
   8 -21  -2 110.158 187.679   3
  -7 -21   2 142.188 179.297   3
   7 -21  -2 96.0807 136.884   3
  -6 -21   2 462.097 213.279   3
   6 -21  -2 1116.93 397.655   3
  -5 -21   2 1222.09 338.054   3
   5 -21  -2 1137.52 330.127   3
  -4 -21   2 115.847 205.283   3
   4 -21  -2 153.496 181.210   3
  -4 -21   2 215.994 239.414   2
   3 -21  -2 673.104 287.921   3
  -3 -21   2 618.443 252.366   2
  -3 -21   2 423.499 226.205   3
  -2 -21   2 17.8112 127.931   2
   2 -21  -2 97.7885 109.142   3
  -2 -21   2 77.6990 133.805   3
   1 -21  -2 72.5568 149.359   3
  -1 -21   2 104.045 150.291   2
  -1 -21   2 63.8225 105.406   3
   0 -21   2 786.116 264.377   3
   0 -21  -2 885.934 305.325   3
   0 -21   2 643.364 267.605   2
   1 -21   2 213.347 166.113   2
  -1 -21  -2 189.502 155.585   3
   1 -21   2 370.514 229.424   3
   2 -21   2 118.141 187.561   2
   2  21   2 221.074 285.204   1
   2 -21   2 107.104 186.084   3
  -2 -21  -2 119.952 120.538   3
  -3 -21  -2 690.153 280.817   3
   3 -21   2 1056.67 303.179   2
   3 -21   2 579.150 233.464   3
   3  21   2 1092.17 403.424   1
   4  21   2 1400.01 435.806   1
  -4 -21  -2 908.794 306.598   3
   4 -21   2 1408.33 329.243   3
   5  21   2 87.1781 160.115   1
   5 -21   2 87.9801 145.166   3
  -5 -21  -2 33.8071 167.452   3
   6 -21   2 38.9121 122.075   3
  -6 -21  -2 208.520 186.711   3
   6  21   2 192.943 163.015   1
   7  21   2 107.516 232.687   1
  -7 -21  -2 235.900 255.825   3
   7 -21   2 30.0525 182.121   3
  -8 -21  -2 125.263 166.895   3
  -6 -22   2 186.009 192.959   3
   6 -22  -2 140.314 158.886   3
  -5 -22   2 420.227 243.299   3
   5 -22  -2 153.082 207.363   3
   4 -22  -2 1168.45 283.351   3
  -4 -22   2 1050.41 301.723   3
  -3 -22   2 713.355 271.667   3
  -3 -22   2 441.655 227.232   2
   3 -22  -2 889.293 265.729   3
   2 -22  -2 150.257 201.200   3
  -2 -22   2 221.570 167.910   3
  -2 -22   2 66.6519 156.487   2
  -1 -22   2 303.011 188.994   3
   1 -22  -2 243.076 224.275   3
  -1 -22   2 155.981 222.279   2
   0 -22  -2 37.8108 131.561   3
   0 -22   2 226.952 173.816   3
   0 -22   2 119.505 163.626   2
   1  22   2 455.305 246.016   1
   1 -22   2 237.770 209.752   3
   1 -22   2 276.765 236.103   2
  -1 -22  -2 37.6441 139.895   3
   2  22   2 1824.96 436.594   1
   2 -22   2 551.463 216.108   3
   2 -22   2 888.770 363.090   2
  -2 -22  -2 703.848 281.463   3
  -3 -22  -2 2011.03 349.235   3
   3  22   2 3823.93 538.971   1
   3 -22   2 2218.20 439.181   2
   3 -22   2 2295.30 400.332   3
   4  22   2 634.431 296.838   1
   4 -22   2 71.0792 175.229   3
  -4 -22  -2 120.572 153.702   3
   5  22   2 538.155 232.329   1
   5 -22   2 237.718 183.686   3
  -5 -22  -2 69.0193 156.949   3
  -6 -22  -2-31.2895 120.679   3
   6 -22   2 178.040 228.392   3
  -5 -23   2 595.367 281.306   3
  -4  23   2 324.530 248.719   1
  -4 -23   2 199.072 137.466   3
   4 -23  -2 149.393 204.884   3
  -3 -23   2 192.845 221.349   3
  -3  23   2 638.482 299.008   1
   3 -23  -2 244.852 180.192   3
  -2 -23   2 270.510 210.530   2
  -2 -23   2 136.760 166.553   3
  -2  23   2 611.843 301.948   1
   2 -23  -2 915.471 282.591   3
  -1  23   2 1397.03 377.940   1
  -1 -23   2 586.974 325.538   3
  -1 -23   2 283.890 269.768   2
   1 -23  -2 242.804 218.059   3
   0  23   2 1337.22 310.209   1
   0 -23   2 294.612 192.931   2
   0 -23   2 197.650 196.041   3
   0 -23  -2 344.774 216.447   3
   1 -23   2 143.675 224.699   2
   1  23   2 1055.73 302.223   1
   1 -23   2 365.570 246.596   3
  -1 -23  -2 67.9369 232.564   3
   2  23   2 750.397 265.169   1
  -2 -23  -2 362.351 244.661   3
   2 -23   2 597.275 282.631   2
   2 -23   2 358.604 214.252   3
   3  23   2 267.245 224.596   1
   3 -23   2 53.9361 111.284   3
  -3 -23  -2 171.995 198.884   3
   4 -23   2 1744.44 433.144   3
  -4 -23  -2 2174.45 454.849   3
  -3  24   2 444.422 203.689   1
  -3 -24   2 276.835 208.236   3
  -2 -24   2 420.414 254.028   3
  -2 -24   2 200.281 251.704   2
  -1 -24   2 116.714 197.949   3
  -1 -24   2 259.620 259.133   2
   0 -24   2 500.423 287.759   2
   0 -24   2 244.311 207.022   3
   1 -24   2 383.759 268.913   2
   1 -24   2 137.568 140.099   3
   2 -24   2 68.6506 134.488   3
  18   0  -3 80.5590 186.137   0
 -17   0   3 206.655 191.974   2
  17   0  -3 278.321 280.022   0
  16   0  -3 147.431 183.846   0
 -16   0   3 130.393 142.965   2
  15   0  -3 292.084 122.205   0
 -15   0   3 362.433 224.025   2
  14   0  -3 3917.53 421.959   0
  13   0  -3 654.698 249.307   0
  12   0  -3 9856.70 488.446   0
  11   0  -3 1256.79 192.962   0
  10   0  -3 1866.79 214.631   0
   9   0  -3 13.4799 90.2111   0
   9   0  -3 69.6346 64.5486   3
   8   0  -3 5520.72 249.498   0
   8   0  -3 6724.87 252.854   3
   7   0  -3 13992.6 264.665   3
   7   0  -3 13748.5 351.483   0
   6   0  -3 882.463 87.7955   3
   6   0  -3 1088.64 154.531   0
   5   0  -3 15345.8 301.660   0
  -5   0   3 15033.7 138.028   1
   5   0  -3 14376.6 184.455   3
  -4   0   3 1547.33 98.0589   1
   4   0  -3 1605.83 106.758   3
   4   0  -3 2858.92 187.254   0
   3   0  -3 144607. 328.468   3
  -3   0   3 149944. 397.643   1
  -2   0   3 4286.69 107.439   1
  -2   0   3 4681.88 161.319   2
   2   0  -3 4467.09 67.7500   3
  -1   0   3 427823. 2394.31   2
  -1   0   3 421955. 2629.38   1
   0   0   3 350987. 661.231   1
   0   0   3 354710. 1959.69   2
   1   0   3 118787. 450.915   0
   1   0   3 114554. 300.157   2
   1   0   3 113397. 443.012   1
   2   0   3 628.974 111.110   0
   2   0   3 289.492 110.775   1
   2   0   3 441.768 70.0115   2
   3   0   3 620.379 137.646   1
   3   0   3 666.593 124.921   0
   4   0   3 17489.1 249.741   1
   4   0   3 18873.8 334.099   0
   5   0   3 1800.67 149.708   1
   5   0   3 1374.78 142.498   0
   6   0   3 3006.40 235.326   0
   6   0   3 2867.41 162.215   1
   7   0   3 1378.40 176.442   1
   7   0   3 879.243 112.344   0
   8   0   3 556.127 138.086   1
   8   0   3 597.308 189.863   0
   9   0   3 18607.7 436.470   0
   9   0   3 18852.6 328.136   1
  10   0   3 170.929 113.342   0
  11   0   3 21984.5 596.600   0
  12   0   3 73.4266 143.453   0
  13   0   3 56.1375 126.660   0
  14   0   3 506.324 187.523   0
  15   0   3 64.1448 153.212   0
  16   0   3 34.7180 135.230   0
 -18   1   3 374.225 166.216   2
  18   1  -3 229.233 241.812   0
  18  -1  -3 248.569 228.355   0
  17   1  -3 410.443 231.140   0
 -17   1   3 207.559 153.327   2
 -17  -1   3 260.294 236.406   2
  17  -1  -3 165.466 207.196   0
  16   1  -3 1074.56 385.281   0
 -16  -1   3 314.188 168.568   2
  16  -1  -3 976.203 333.657   0
  15  -1  -3 376.802 181.068   0
  15   1  -3 675.302 175.501   0
 -15  -1   3 812.837 191.432   2
  14   1  -3 757.585 286.898   0
  14  -1  -3 650.437 239.021   0
 -14  -1   3 623.769 241.710   2
  13  -1  -3 11443.9 525.553   0
  13   1  -3 11355.7 551.662   0
 -13  -1   3 12479.5 476.656   2
  12  -1  -3 194.456 200.948   0
  12   1  -3-36.0114 94.1572   0
 -12  -1   3 553.071 180.323   2
  11  -1  -3 42.7547 88.1330   0
  11   1  -3 2.27538 162.972   0
  11  -1  -3 11.5385 115.094   3
  10  -1  -3 4311.59 302.773   3
  10   1  -3 3233.66 231.835   0
  10  -1  -3 2807.26 225.304   0
   9   1  -3 1129.33 127.795   0
   9  -1  -3 1454.83 179.864   0
   9  -1  -3 2147.75 231.348   3
   8  -1  -3 8500.11 230.801   3
   8  -1  -3 8445.57 278.340   0
   8   1  -3 8393.73 302.718   0
   7   1  -3 29908.1 464.200   0
   7  -1  -3 29784.6 423.960   0
   7  -1  -3 30553.7 372.912   3
   6  -1  -3 3755.93 172.821   3
   6   1  -3 3594.41 161.678   3
   6   1  -3 3695.76 231.432   0
   6  -1  -3 3428.00 206.701   0
   5  -1  -3 2500.50 111.920   3
  -5  -1   3 3421.86 196.577   2
   5   1  -3 3379.93 197.894   0
   5   1  -3 1692.36 103.968   3
  -5   1   3 2423.34 71.3938   1
   5  -1  -3 3134.71 189.579   0
  -4   1   3 41477.4 201.672   1
  -4  -1   3 45228.4 386.166   2
   4  -1  -3 41316.9 257.798   3
  -4  -1   3 43609.1 261.550   1
   4   1  -3 42740.8 334.771   0
   4   1  -3 39944.7 218.363   3
   4  -1  -3 43499.1 366.784   0
  -3  -1   3 1118.00 159.513   2
  -3  -1   3 914.408 77.5547   1
  -3   1   3 744.833 60.9306   1
   3   1  -3 862.319 65.1231   3
   3  -1  -3 950.397 83.9040   3
  -2  -1   3 1960.57 103.137   1
  -2   1   3 2641.95 144.599   1
  -2  -1   3 1798.74 97.4782   2
   2  -1  -3 1887.12 79.6775   3
  -1  -1   3 129351. 437.352   1
   1  -1  -3 124463. 300.212   3
  -1  -1   3 124191. 405.884   2
  -1   1   3 132263. 415.414   1
  -1   1   3 127176. 356.172   2
   0  -1   3 80.1622 77.5720   1
   0   1   3 106.134 34.1973   2
   0   1   3 85.7582 39.5410   1
   0  -1   3 149.595 43.0141   2
   1  -1   3 1994.13 94.3653   1
   1  -1   3 6557.17 159.991   0
   1   1   3 6270.59 152.106   1
   1   1   3 6783.59 185.338   0
   1  -1   3 1274.58 92.7303   3
   1  -1   3 6934.39 156.261   2
   1   1   3 6699.43 81.5612   2
   2   1   3 96022.5 460.714   0
   2  -1   3 93346.9 484.640   0
   2  -1   3 90185.3 342.683   2
   2   1   3 90944.1 228.965   2
   2   1   3 84515.6 387.617   1
   2  -1   3 83647.2 379.205   3
   2  -1   3 87008.8 412.729   1
   3  -1   3 4235.35 163.615   2
   3  -1   3 4066.03 173.753   0
   3  -1   3 3703.18 133.956   1
   3   1   3 3686.95 131.179   1
   3  -1   3 3757.48 150.262   3
   3   1   3 4121.71 162.057   0
   4  -1   3 1530.07 171.755   3
   4   1   3 7689.31 275.185   0
   4  -1   3 5893.11 160.933   1
   4   1   3 5892.18 176.219   1
   4  -1   3 7564.73 259.786   0
   5   1   3 3530.83 141.567   1
   5  -1   3 3523.66 172.333   0
   5  -1   3 3893.11 179.859   1
   5   1   3 3911.06 201.041   0
   5  -1   3 3803.34 211.517   3
   6   1   3 19102.1 287.328   1
   6  -1   3 18808.7 256.292   1
   6   1   3 19628.7 382.095   0
   6  -1   3 19348.3 373.208   0
   7   1   3 22.3088 71.4285   0
   7   1   3 609.022 131.463   1
   7  -1   3 8.68821 39.6399   1
   7  -1   3 27.8818 91.5862   0
   8   1   3 8284.14 306.972   0
   8  -1   3 6597.13 195.504   1
   8   1   3 10108.8 275.947   1
   8  -1   3 8270.93 293.584   0
   9  -1   3 2681.11 227.336   0
   9   1   3 2859.76 190.733   1
   9  -1   3 2671.83 130.943   1
   9   1   3 2610.32 223.035   0
  10  -1   3 2386.28 229.992   0
  10   1   3 2309.77 200.604   0
  11  -1   3 3391.50 425.810   0
  11   1   3 2289.76 306.730   0
  12  -1   3 10431.7 529.449   0
  12   1   3 10298.1 515.223   0
  13   1   3 2259.97 395.433   0
  13  -1   3 2528.84 355.674   0
  14   1   3 80.0121 153.523   0
  14  -1   3 75.2787 125.376   0
  15  -1   3-41.0610 108.879   0
  15   1   3-37.5314 89.3832   0
  16  -1   3 62.4590 151.244   0
  16   1   3 71.5372 204.135   0
 -18   2   3 558.466 251.480   2
  18  -2  -3 184.756 175.929   0
  17   2  -3 1011.10 354.324   0
  17  -2  -3 611.441 321.320   0
 -16  -2   3 176.953 159.038   2
  16  -2  -3 225.551 219.445   0
  16   2  -3 175.229 174.158   0
  15   2  -3 307.685 161.373   0
 -15  -2   3 793.399 223.988   2
  15  -2  -3 622.739 191.345   0
 -14  -2   3 4480.21 355.043   2
  14  -2  -3 4422.41 404.860   0
  14   2  -3 4716.26 385.863   0
 -13  -2   3 1512.14 299.542   2
  13  -2  -3 949.802 205.250   3
  13   2  -3 503.248 259.678   0
  13  -2  -3 561.287 245.903   0
 -12  -2   3 7157.57 384.684   2
  12  -2  -3 6680.07 333.847   3
  12   2  -3 5653.88 374.058   0
  12  -2  -3 5977.56 365.661   0
 -11  -2   3 1103.79 294.452   2
  11  -2  -3 496.230 177.056   3
  11   2  -3 270.221 132.566   0
  11  -2  -3 284.307 122.809   0
  10  -2  -3-27.8971 91.7476   0
 -10  -2   3 680.298 229.969   2
  10  -2  -3 44.5071 75.3350   3
  10   2  -3 68.0364 112.369   0
   9  -2  -3 579.346 112.758   0
  -9  -2   3 1315.82 251.719   2
   9  -2  -3 791.731 133.503   3
   9   2  -3 842.232 173.877   0
   8   2  -3 2124.53 187.954   0
  -8  -2   3 3265.42 300.928   2
   8  -2  -3 2793.77 228.778   3
   8  -2  -3 2225.09 216.204   0
   7   2  -3 633.973 139.970   0
  -7  -2   3 1305.01 194.067   2
   7  -2  -3 953.360 165.533   0
   7  -2  -3 1428.31 143.981   3
   6  -2  -3 6259.60 208.453   3
  -6  -2   3 6465.89 224.702   2
   6   2  -3 7700.01 316.790   0
   6  -2  -3 6557.94 264.735   0
   5  -2  -3 55888.3 363.352   3
  -5  -2   3 59470.3 445.427   2
   5  -2  -3 57552.0 459.691   0
   5   2  -3 61200.6 477.867   0
  -5   2   3 55715.0 199.761   1
   4  -2  -3 32388.5 271.645   3
  -4  -2   3 31971.7 314.556   2
   4   2  -3 33173.3 310.138   0
  -4   2   3 32875.8 190.319   1
   4  -2  -3 31591.4 287.737   0
  -3  -2   3 13514.3 202.014   1
  -3   2   3 12022.8 130.101   1
  -3  -2   3 12341.4 207.269   2
   3  -2  -3 12714.5 168.433   3
  -2  -2   3 2905.12 164.055   2
  -2  -2   3 2694.03 125.611   1
  -2   2   3 2549.23 94.9711   1
   2  -2  -3 2757.77 125.952   3
  -1  -2   3 13537.6 243.816   1
  -1   2   3 14649.3 251.281   1
   1  -2  -3 13069.1 182.399   3
  -1  -2   3 12402.8 177.563   2
   0  -2   3 4573.21 94.2940   3
   0  -2   3 4614.19 133.862   1
   0   2   3 5306.12 181.390   1
   0  -2   3 4528.71 128.339   2
   1   2   3 2308.42 161.259   0
   1  -2   3 2016.02 101.766   3
   1  -2   3 1882.18 117.483   2
   1  -2   3 1809.97 131.536   1
   1  -2   3 1831.21 128.383   0
   1   2   3 2519.24 224.595   1
   2  -2   3 61772.8 360.630   3
   2  -2   3 64288.4 345.175   2
   2  -2   3 64840.4 371.669   0
   2  -2   3 64123.7 377.013   1
   2   2   3 68398.0 380.250   0
   2   2   3 62389.5 376.460   1
   3  -2   3 936.887 133.232   0
   3  -2   3 986.975 103.515   3
   3  -2   3 908.539 116.566   2
   3  -2   3 887.978 103.281   1
   3   2   3 1153.63 146.876   0
   3   2   3 1193.57 126.909   1
   4  -2   3 17538.7 226.822   1
   4   2   3 19199.1 300.799   0
   4  -2   3 16865.0 281.083   3
   4  -2   3 18785.7 302.851   0
   4   2   3 17134.8 262.854   1
   5  -2   3 6942.48 195.789   1
   5  -2   3 6274.68 251.269   3
   5  -2   3 6716.87 240.704   0
   5   2   3 7020.33 219.199   1
   5   2   3 6475.58 200.275   0
   6   2   3 8981.33 237.626   1
   6  -2   3 10192.3 345.434   3
   6  -2   3 9752.40 225.404   1
   6   2   3 9109.01 267.050   0
   6  -2   3 9540.48 318.452   0
   7  -2   3 352.806 90.8073   3
   7  -2   3 362.897 77.5703   1
   7   2   3 559.689 124.635   0
   7   2   3 415.979 111.723   1
   7  -2   3 397.107 86.7388   0
   8  -2   3 9361.64 360.656   3
   8  -2   3 9416.09 245.796   1
   8   2   3 8595.93 227.919   1
   8  -2   3 8563.97 302.813   0
   8   2   3 8482.58 296.651   0
   9   2   3 242.603 102.010   1
   9  -2   3 28.7867 82.0495   0
   9   2   3 45.1833 121.027   0
  10  -2   3 992.406 160.767   0
  10   2   3 1609.01 251.062   0
  11   2   3 7324.54 478.508   0
  11  -2   3 6800.99 381.408   0
  12   2   3 2584.53 321.949   0
  12  -2   3 2672.54 337.478   0
  13   2   3 727.956 296.131   0
  13  -2   3 1158.29 276.977   0
  14  -2   3 166.783 117.317   0
  14   2   3 9.39546 119.848   0
  15  -2   3 65.5367 134.171   0
  15   2   3 23.0695 114.339   0
  16   2   3 154.743 216.267   0
  16  -2   3 118.301 161.391   0
  17   3  -3 1394.63 396.756   0
  17  -3  -3 632.327 328.323   0
 -16  -3   3 509.166 251.475   2
  16  -3  -3 582.714 241.963   0
  16   3  -3 723.347 219.232   0
 -15  -3   3 42.9794 89.5910   2
  15   3  -3 127.970 147.759   0
  15  -3  -3 147.495 169.910   0
 -14  -3   3 108.804 134.994   2
  14  -3  -3 11.1033 155.223   3
  14   3  -3 177.717 198.636   0
  14  -3  -3 44.3842 118.789   0
 -13  -3   3 12301.5 485.823   2
  13  -3  -3 12152.4 556.358   0
  13  -3  -3 13788.1 502.031   3
  13   3  -3 11995.2 524.253   0
  12  -3  -3 4189.99 343.432   0
  12   3  -3 4528.87 345.927   0
  12  -3  -3 5922.77 439.867   3
 -12  -3   3 4642.16 346.089   2
 -11  -3   3 608.308 204.431   2
  11  -3  -3 409.328 125.008   3
  11  -3  -3 271.106 152.439   0
  11   3  -3 300.988 162.811   0
 -10  -3   3 9360.34 399.451   2
  10   3  -3 8503.50 403.346   0
  10  -3  -3 7946.71 344.102   3
  10  -3  -3 8101.23 426.363   0
   9  -3  -3 7964.07 338.573   0
   9  -3  -3 8595.96 299.026   3
   9   3  -3 8875.12 439.301   0
  -9  -3   3 8395.25 349.160   2
   8  -3  -3 702.783 110.401   0
   8  -3  -3 1280.50 177.212   3
  -8  -3   3 1248.97 196.711   2
   8   3  -3 1352.59 262.412   0
  -7  -3   3 373.782 129.058   2
   7  -3  -3 376.596 118.583   3
   7   3  -3 268.522 82.4262   0
   7  -3  -3 211.901 91.5093   0
  -6  -3   3 33489.7 380.323   2
   6  -3  -3 33845.6 397.679   0
   6  -3  -3 35772.0 384.635   3
  -6   3   3 31548.3 128.769   1
   6   3  -3 34205.6 398.671   0
   5  -3  -3 17549.9 263.053   3
   5   3  -3 18526.6 346.237   0
  -5  -3   3 18047.1 310.813   2
  -5   3   3 17110.9 140.126   1
   5  -3  -3 17524.6 290.709   0
   4   3  -3 1483.52 145.482   0
  -4  -3   3 1170.62 104.642   2
   4  -3  -3 1732.02 208.589   0
   4  -3  -3 1342.15 119.670   3
  -4   3   3 1296.70 71.1607   1
  -3   3   3 5045.23 149.750   1
  -3  -3   3 4770.33 173.242   2
   3  -3  -3 4346.74 128.660   3
  -2   3   3 3404.86 148.619   1
   2  -3  -3 2493.07 136.237   3
  -2  -3   3 2329.43 71.4451   3
  -2  -3   3 2991.63 159.464   1
  -2  -3   3 2434.84 161.313   2
  -1   3   3 1756.77 143.506   1
  -1  -3   3 685.145 60.4809   3
  -1  -3   3 645.808 117.803   1
   1  -3  -3 733.606 124.357   3
  -1  -3   3 618.368 95.8278   2
   0  -3   3 30384.8 186.423   3
   0   3   3 36486.5 288.746   1
   0  -3   3 34776.7 306.373   2
   0  -3   3 35863.3 310.613   1
   1  -3   3 8535.88 183.958   0
   1  -3   3 7748.83 166.843   2
   1  -3   3 8886.99 212.876   1
   1   3   3 8139.00 156.410   0
   1  -3   3 8335.67 174.220   3
   1   3   3 8832.01 198.353   1
   2  -3   3 197.727 63.3718   3
   2  -3   3 187.331 62.0158   1
   2   3   3 258.114 92.1858   0
   2  -3   3 387.092 125.290   2
   2  -3   3 304.898 102.626   0
   2   3   3 740.933 155.259   1
   3  -3   3 46355.6 379.320   3
   3  -3   3 47081.0 340.963   1
   3   3   3 52081.4 408.895   0
   3  -3   3 48494.4 386.621   0
   3  -3   3 46685.9 362.156   2
   3   3   3 46853.1 343.030   1
  -4  -3  -3 21035.1 122.312   2
   4  -3   3 23774.4 347.466   3
   4   3   3 26107.5 335.499   0
   4   3   3 26048.4 328.073   1
   4  -3   3 24055.6 306.803   2
   4  -3   3 23241.4 273.417   1
   4  -3   3 25399.6 343.513   0
   5  -3   3 1534.34 184.206   0
  -5  -3  -3 1780.62 92.9755   2
   5  -3   3 1355.42 154.908   3
   5   3   3 1391.54 142.268   0
   5   3   3 2204.50 210.256   1
   5  -3   3 901.921 103.735   1
   6  -3   3 3894.10 154.761   1
   6  -3   3 3950.67 229.843   3
   6  -3   3 4586.98 258.884   0
   6   3   3 4719.32 257.068   1
   6   3   3 4220.42 193.410   0
   7  -3   3 19561.6 387.681   0
   7  -3   3 18708.9 400.878   3
   7   3   3 21081.5 370.368   1
   7   3   3 19386.2 402.503   0
   7  -3   3 19566.8 294.334   1
   8  -3   3 1805.65 238.212   0
   8  -3   3 1993.34 147.708   1
   8   3   3 2106.22 256.515   0
   8   3   3 2039.36 193.373   1
   8  -3   3 2406.71 273.168   3
   9   3   3 934.005 187.430   0
   9  -3   3 1521.84 279.137   3
   9  -3   3 1082.32 153.050   0
   9   3   3 1225.89 155.582   1
  10  -3   3 121.728 141.205   3
  10   3   3 60.3849 75.4741   1
  10   3   3 49.1223 92.7144   0
  10  -3   3-3.16859 85.6045   0
  11   3   3 550.510 131.870   0
  11  -3   3 914.965 248.332   0
  12   3   3 4213.44 405.468   0
  12  -3   3 3537.18 359.149   0
  13   3   3 1445.21 241.491   0
  13  -3   3 1345.93 293.936   0
  14  -3   3 9.32057 103.873   0
  14   3   3 49.8173 139.622   0
  15  -3   3 229.511 131.616   0
  15   3   3 342.040 218.378   0
  16   3   3 2060.98 340.582   0
  16  -3   3 2817.59 427.994   0
  17   4  -3 2141.16 420.496   0
  17  -4  -3 1929.16 291.641   0
  16   4  -3 282.593 236.048   0
  16  -4  -3 252.587 212.777   0
 -15  -4   3 57.5496 121.505   2
  15   4  -3 31.0634 143.066   0
  15  -4  -3 32.3409 136.140   3
  15  -4  -3 28.3181 119.830   0
  14  -4  -3 2447.00 306.138   0
 -14  -4   3 3509.50 341.472   2
  14   4  -3 3102.52 318.286   0
  14  -4  -3 2996.88 363.624   3
 -13  -4   3 506.726 150.322   2
  13  -4  -3 1054.06 294.313   3
  13  -4  -3 744.328 229.070   0
  13   4  -3 732.278 243.811   0
 -12  -4   3 786.994 194.286   2
  12  -4  -3 772.291 247.416   3
  12   4  -3 938.433 225.749   0
  12  -4  -3 949.426 257.383   0
 -11  -4   3 3960.64 339.147   2
  11  -4  -3 4061.47 301.711   3
  11   4  -3 3911.86 364.195   0
  11  -4  -3 3614.47 282.595   0
 -10  -4   3 4751.96 312.697   2
  10   4  -3 4657.77 321.659   0
  10  -4  -3 4564.77 266.650   3
  10  -4  -3 4878.06 362.778   0
   9  -4  -3 12316.1 453.257   0
   9  -4  -3 12789.5 423.970   3
  -9  -4   3 11750.2 365.720   2
   9   4  -3 13234.4 475.533   0
  -8  -4   3 23689.9 409.862   2
   8   4  -3 23378.4 452.750   0
   8  -4  -3 23773.4 469.962   0
   8  -4  -3 24259.7 421.383   3
  -7  -4   3 325.899 128.627   2
   7   4  -3 468.300 134.107   0
   7  -4  -3 394.361 135.836   3
   7  -4  -3 355.419 105.758   0
  -6  -4   3 3833.97 176.854   2
   6  -4  -3 3903.46 214.908   0
   6  -4  -3 3643.02 161.545   3
  -6   4   3 3953.63 79.5629   1
   6   4  -3 4114.53 185.973   0
  -5  -4   3 37733.6 346.676   2
   5  -4  -3 41044.4 375.088   3
   5   4  -3 40784.9 405.041   0
  -5   4   3 38569.8 219.429   1
   5  -4  -3 38953.4 397.233   0
   4   4  -3 32501.3 327.327   0
   4  -4  -3 31287.5 326.567   0
  -4   4   3 32444.5 230.325   1
  -4  -4   3 31936.9 327.294   2
   4  -4  -3 32063.9 315.515   3
  -3   4   3 33800.5 244.432   1
   3  -4  -3 34277.0 285.969   3
  -3  -4   3 36040.3 343.720   2
  -2   4   3 74101.9 370.360   1
  -2  -4   3 76718.6 264.426   3
   2  -4  -3 76712.3 370.936   3
  -2  -4   3 75611.3 411.403   2
  -1  -4   3 137610. 351.467   3
  -1  -4   3 155251. 599.896   1
  -1  -4   3 135839. 510.204   2
   1  -4  -3 141799. 491.826   3
  -1   4   3 149318. 527.943   1
   0   4   3 36663.1 346.465   1
   0  -4  -3 37175.6 317.779   3
   0  -4   3 34665.7 305.270   2
   0  -4   3 34257.2 225.339   3
   0  -4   3 36753.5 319.178   1
   1   4   3 79728.0 448.907   1
   1  -4   3 76930.8 360.854   0
   1  -4   3 75362.7 415.018   2
   1   4   3 75442.1 347.140   0
   1  -4   3 71496.2 343.106   3
   1  -4   3 77554.6 423.655   1
   2   4   3 1519.18 100.289   0
   2  -4   3 1490.23 158.039   1
   2  -4   3 1397.96 97.1149   3
   2  -4   3 1590.61 134.315   0
   2  -4   3 1686.20 161.163   2
   2   4   3 1375.68 111.444   1
   3   4   3 27883.2 301.428   1
   3   4   3 31272.9 326.349   0
   3  -4   3 29043.1 333.808   3
   3  -4   3 29166.1 323.977   2
   3  -4   3 29049.3 284.722   0
   3  -4   3 30064.3 315.455   1
   4   4   3 62821.3 448.616   0
   4  -4   3 60087.0 402.664   1
  -4  -4  -3 52655.5 165.928   2
   4  -4   3 60149.7 461.554   2
   4  -4   3 63597.7 477.157   0
   4   4   3 57242.8 421.248   1
   4  -4   3 57809.6 476.331   3
  -5  -4  -3 3441.98 79.3930   2
   5  -4   3 3365.07 157.110   3
   5  -4   3 3819.30 164.227   1
   5  -4   3 3763.28 200.943   0
   5   4   3 3794.56 187.998   0
   5   4   3 4476.52 216.168   1
  -6  -4  -3 170.768 63.8915   2
   6  -4   3 350.793 160.227   3
   6  -4   3 62.6907 76.1323   0
   6   4   3 334.692 99.1678   0
   6   4   3 862.533 183.255   1
   6  -4   3 228.861 78.6101   1
  -7  -4  -3 18206.7 228.187   2
   7  -4   3 20261.1 480.057   3
   7  -4   3 20643.8 312.428   1
   7   4   3 22040.2 384.547   1
   7   4   3 19873.3 417.825   0
   7  -4   3 21311.0 482.728   0
  -8  -4  -3 13079.6 229.414   2
   8  -4   3 13831.5 267.424   1
   8   4   3 13389.6 358.958   1
   8  -4   3 13793.3 427.190   0
   8  -4   3 13404.9 460.579   3
   8   4   3 13761.9 423.161   0
   9   4   3 2573.82 307.322   0
   9  -4   3 2590.77 319.732   3
   9  -4   3 2641.44 245.561   0
   9   4   3 2625.36 249.012   1
  10  -4   3 1410.07 264.963   3
  10   4   3 1327.23 172.364   1
  10  -4   3 1408.63 181.056   0
  10   4   3 1192.25 213.129   0
  11   4   3 99.7246 160.719   0
  11  -4   3 250.431 191.361   0
  11  -4   3 252.844 194.051   3
  12   4   3 83.7726 151.940   0
  12  -4   3 266.258 137.264   0
  13   4   3 100.477 141.779   0
  13  -4   3 98.4042 104.774   0
  14   4   3 7.39717 135.246   0
  14  -4   3 14.5776 128.923   0
  15  -4   3 917.969 264.441   0
  15   4   3 594.789 280.409   0
  16  -4   3 900.657 292.729   0
  16   4   3 1057.06 311.314   0
  17  -5  -3 2588.65 362.380   0
  17   5  -3 1939.30 342.386   0
  16   5  -3 3013.90 427.120   0
  16  -5  -3 2665.17 363.689   0
  16  -5  -3 1582.18 285.865   3
  15  -5  -3 55.8074 156.958   3
  15   5  -3 104.838 136.252   0
 -15  -5   3 118.189 138.477   2
  15  -5  -3 91.0621 134.038   0
 -14  -5   3 38.3588 102.497   2
  14  -5  -3 148.763 140.949   3
  14  -5  -3-7.34039 87.1205   0
  14   5  -3 3.61481 113.952   0
  13  -5  -3 18.1217 110.385   0
 -13  -5   3 57.4076 113.933   2
  13  -5  -3 85.3365 158.350   3
  13   5  -3 48.8988 117.887   0
 -12  -5   3 481.948 127.952   2
  12  -5  -3 549.931 210.968   0
  12   5  -3 536.433 209.199   0
  12  -5  -3 743.694 200.895   3
  11  -5  -3 4779.45 383.701   0
  11  -5  -3 3823.07 305.523   3
  11   5  -3 4531.10 381.391   0
 -11  -5   3 3818.43 312.118   2
  10   5  -3 4021.95 362.637   0
  10  -5  -3 3414.79 244.499   3
 -10  -5   3 3575.53 235.105   2
  10  -5  -3 4259.50 340.459   0
   9  -5  -3 19622.7 422.599   3
  -9  -5   3 17281.5 355.151   2
   9  -5  -3 19745.1 473.865   0
   9   5  -3 18583.4 430.839   0
   8   5  -3 6644.94 334.448   0
   8  -5  -3 6165.30 320.091   0
   8  -5  -3 6578.62 333.551   3
  -8  -5   3 5653.81 233.395   2
  -7   5   3 5743.74 75.8612   1
  -7  -5   3 6058.24 210.913   2
   7   5  -3 6707.94 295.265   0
   7  -5  -3 6266.06 261.386   3
   7  -5  -3 6657.79 270.108   0
  -6   5   3 150.076 61.5451   1
  -6  -5   3 105.139 125.119   2
   6  -5  -3 54.3506 58.9236   3
   6   5  -3 36.0713 60.1058   0
   6  -5  -3 8.57943 36.5937   0
   5  -5  -3 1451.91 146.620   3
  -5   5   3 1264.35 69.5766   1
   5   5  -3 1594.22 157.706   0
  -5  -5   3 1596.99 154.171   2
   5  -5  -3 1413.29 130.943   0
  -4  -5   3 20653.4 318.049   2
  -4   5   3 19434.2 222.749   1
   4   5  -3 19295.9 254.811   0
   4  -5  -3 19889.3 255.625   0
   4  -5  -3 20418.2 286.958   3
  -3   5   3 34516.2 299.625   1
  -3  -5   3 36207.9 368.052   2
  -3  -5   3 36075.1 246.361   3
   3  -5  -3 36619.2 315.074   3
  -2   5   3 1428.24 171.922   1
  -2  -5   3 1326.87 79.3202   3
   2  -5  -3 1378.71 126.232   3
  -2  -5   3 1383.88 120.569   2
   1  -5  -3 6971.55 190.189   3
  -1   5   3 7756.60 224.849   1
  -1  -5   3 7118.79 226.171   2
  -1  -5   3 6398.21 125.922   3
   0   5   3 20640.4 292.375   1
   0  -5   3 19762.3 283.327   2
   0  -5  -3 19992.9 262.160   3
   0  -5   3 21271.3 295.416   1
   0  -5   3 18996.7 211.064   3
   1   5   3 1596.18 114.204   0
   1  -5   3 1436.99 98.9047   0
   1   5   3 1510.75 147.803   1
   1  -5   3 1948.60 180.226   1
   1  -5   3 1580.53 112.912   3
   1  -5   3 1579.80 144.589   2
   2   5   3 41592.0 392.218   1
   2   5   3 43300.6 334.484   0
   2  -5   3 44055.0 388.903   1
   2  -5   3 39900.6 328.503   3
   2  -5   3 41960.9 384.555   2
   2  -5   3 41961.7 305.965   0
  -2  -5  -3 41973.2 164.103   2
   3  -5   3 3099.65 184.258   1
   3   5   3 3232.58 198.147   0
   3  -5   3 3149.67 178.946   2
  -3  -5  -3 3031.79 58.3829   2
   3   5   3 2770.91 163.172   1
   3  -5   3 3326.49 174.885   0
   3  -5   3 3001.56 162.397   3
   4  -5   3 306.661 80.0929   3
   4  -5   3 366.150 134.676   0
   4   5   3 211.620 85.1358   1
   4  -5   3 384.724 119.968   2
   4  -5   3 300.644 111.285   1
   4   5   3 380.832 125.764   0
  -4  -5  -3 285.073 40.3649   2
   5  -5   3 878.636 115.894   1
   5  -5   3 741.485 105.976   3
  -5  -5  -3 736.919 52.5834   2
   5  -5   3 962.544 202.648   0
   5   5   3 836.689 163.519   0
   5   5   3 515.903 85.4268   1
   6  -5   3 29935.8 362.764   1
   6  -5   3 29570.2 413.305   0
   6   5   3 28798.6 397.653   0
  -6  -5  -3 28439.6 208.778   2
   6   5   3 28162.8 363.084   1
   6  -5   3 28040.7 416.007   3
   7  -5   3 10108.2 253.269   1
   7  -5   3 10579.9 414.705   3
   7  -5   3 10417.7 340.951   0
  -7  -5  -3 9209.25 163.623   2
   7   5   3 11024.8 393.436   0
   7   5   3 11451.9 334.421   1
   8  -5   3 7.83075 45.7754   1
   8  -5   3 19.1956 94.1462   3
   8   5   3 304.434 177.394   1
   8  -5   3 68.1674 136.931   0
   8   5   3 88.2388 104.747   0
   9   5   3 6947.29 327.794   1
   9  -5   3 7111.41 437.280   3
   9   5   3 6846.28 394.915   0
   9  -5   3 7318.68 382.969   0
  10  -5   3 1180.17 282.230   3
  10   5   3 900.044 175.270   0
  10   5   3 1080.56 176.136   1
  10  -5   3 874.571 177.414   0
  11  -5   3 123.707 106.110   0
  11  -5   3 452.236 215.639   3
  11   5   3 98.9564 100.402   0
  12  -5   3 303.849 220.373   3
  12   5   3 789.182 141.174   0
  12  -5   3 741.273 134.899   0
  13   5   3-31.8452 83.9592   0
  13  -5   3-13.7212 81.7960   0
  14   5   3-9.11266 101.542   0
  14  -5   3 45.4541 91.5389   0
  15  -5   3 2195.63 401.909   0
  15   5   3 2182.34 422.093   0
  16   5   3 3385.90 328.744   0
  16  -5   3 5197.92 471.797   0
  17   6  -3 1562.82 268.932   0
  17  -6  -3 2592.92 385.295   0
  16  -6  -3 747.878 279.067   3
  16   6  -3 464.093 226.297   0
  16  -6  -3 745.265 231.462   0
  15  -6  -3 51.1838 131.319   0
  15   6  -3 79.0173 176.085   0
  15  -6  -3 30.0788 126.581   3
  14  -6  -3 45.6039 121.415   0
  14   6  -3-50.9491 109.290   0
 -14  -6   3 204.498 155.220   2
  14  -6  -3 176.687 195.655   3
  13   6  -3 17.5941 94.4683   0
 -13  -6   3 21.9612 83.5493   2
  13  -6  -3 47.3172 113.728   0
  13  -6  -3 104.381 160.453   3
  12  -6  -3 1554.34 239.438   0
  12   6  -3 1848.64 260.833   0
  12  -6  -3 2405.91 309.783   3
 -12  -6   3 1365.90 165.549   2
  11  -6  -3 4688.15 324.125   3
  11  -6  -3 4655.70 347.261   0
 -11  -6   3 3968.23 326.151   2
  11   6  -3 5025.32 421.532   0
 -10  -6   3 366.600 102.559   2
  10  -6  -3 727.257 216.424   3
  10  -6  -3 869.949 241.753   0
  10   6  -3 844.762 265.840   0
   9  -6  -3 2051.28 226.349   3
  -9  -6   3 2418.73 227.865   2
   9   6  -3 2782.36 261.117   0
   9  -6  -3 2338.70 231.031   0
  -8  -6   3 24991.1 438.407   2
   8  -6  -3 25902.9 492.403   0
   8   6  -3 24557.9 451.919   0
   8  -6  -3 24630.6 454.481   3
   7  -6  -3 522.769 84.6796   3
  -7  -6   3 1006.01 192.833   2
   7  -6  -3 1147.77 223.395   0
   7   6  -3 856.999 178.213   0
  -7   6   3 1216.63 94.5481   1
  -6   6   3 42.8380 35.1244   1
   6   6  -3 49.6986 53.4169   0
   6  -6  -3 39.8282 64.6093   0
  -6  -6   3 240.577 131.654   2
   6  -6  -3 74.2169 60.1011   3
  -5   6   3 98.6813 83.9164   1
   5  -6  -3 48.7923 50.6554   0
  -5  -6   3 178.749 137.668   2
   5  -6  -3 21.6826 64.2848   3
   5   6  -3 14.1135 50.2880   0
  -4   6   3 4436.38 168.205   1
   4  -6  -3 3923.41 162.804   3
  -4  -6   3 4386.64 208.311   2
   4  -6  -3 4007.19 162.308   0
   4   6  -3 4854.40 193.597   0
  -3   6   3 23731.7 284.991   1
  -3  -6   3 22004.2 222.160   3
  -3  -6   3 23081.6 306.082   2
   3  -6  -3 23112.3 306.575   3
   3   6  -3 22644.3 246.899   0
  -2   6   3 11395.8 247.505   1
   2  -6  -3 11021.2 235.941   3
  -2  -6   3 10514.1 175.946   3
  -2  -6   3 11235.4 239.071   2
  -1   6   3 31716.8 325.855   1
   1  -6  -3 31624.3 336.202   3
  -1  -6   3 30469.9 335.653   2
  -1  -6   3 29230.7 243.365   3
   0  -6  -3 439.046 119.053   3
   0   6   3 862.137 167.731   1
   0  -6   3 400.710 83.6589   3
   0  -6   3 440.862 131.672   2
   1  -6   3 38677.5 401.945   2
   1   6   3 38958.7 393.925   1
   1  -6   3 36789.5 318.846   3
   1   6   3 38148.0 272.361   0
   1  -6   3 37688.4 262.540   0
   2   6   3 30103.3 375.944   1
   2  -6   3 29989.3 259.722   0
   2  -6   3 29183.6 350.843   2
   2  -6   3 29549.4 321.418   3
  -2  -6  -3 30170.2 190.763   2
   2   6   3 29529.5 263.036   0
   3   6   3 9332.88 287.229   1
   3  -6   3 9267.16 233.475   3
   3  -6   3 9932.01 257.324   1
   3  -6   3 10057.6 301.088   2
   3   6   3 9939.06 241.001   0
  -3  -6  -3 9605.52 116.970   2
   3  -6   3 9443.05 217.152   0
   4   6   3 5686.81 283.863   1
   4  -6   3 6016.14 231.625   3
   4   6   3 5980.01 245.317   0
  -4  -6  -3 5604.12 97.2425   2
   4  -6   3 5772.05 209.799   0
   4  -6   3 6531.91 227.325   1
   4  -6   3 5713.32 269.122   2
   5  -6   3 2103.83 219.162   3
   5  -6   3 2566.31 210.480   2
   5  -6   3 3083.36 196.998   1
   5  -6   3 2397.30 175.350   0
   5   6   3 2119.14 174.419   1
   5   6   3 2695.74 204.773   0
  -5  -6  -3 2428.27 85.7299   2
   6   6   3 1253.89 146.150   0
   6  -6   3 1373.43 196.043   0
   6  -6   3 1338.76 173.076   1
  -6  -6  -3 1194.00 65.6560   2
   6  -6   3 1131.67 205.322   3
   6   6   3 884.268 147.179   1
   7   6   3 17879.6 471.875   0
   7  -6   3 17071.8 302.438   1
   7  -6   3 17750.7 424.109   0
   7  -6   3 16089.9 417.269   3
   7   6   3 15580.8 379.232   1
   8  -6   3 5464.10 331.335   3
   8   6   3 5713.72 339.484   0
   8  -6   3 5421.25 362.062   0
   8   6   3 6351.84 339.681   1
   8  -6   3 5984.29 231.073   1
   9   6   3 1060.90 191.018   1
   9  -6   3 1047.58 265.591   3
   9   6   3 911.019 191.452   0
   9  -6   3 1276.95 241.410   0
  10   6   3 1630.78 195.839   0
  10  -6   3 2306.53 333.607   3
  10   6   3 2414.95 233.389   1
  10  -6   3 1271.55 187.783   0
  11  -6   3 484.252 219.717   3
  11  -6   3 189.593 107.295   0
  11   6   3 158.422 119.240   0
  12  -6   3 215.269 134.001   0
  12  -6   3 1709.91 355.124   3
  12   6   3 423.041 122.449   0
  13  -6   3 466.796 135.791   0
  13   6   3 892.256 184.625   0
  13  -6   3 62.4545 160.243   3
  14   6   3 489.928 195.104   0
  14  -6   3 182.899 197.292   0
  15   6   3 1049.79 362.902   0
  15  -6   3 1055.05 289.186   0
  16   6   3 1215.59 366.524   0
  16  -6   3 412.087 252.451   0
  17  -7  -3 678.862 223.896   3
  17   7  -3 483.648 223.965   0
  17  -7  -3 949.056 309.920   0
  16   7  -3 691.850 245.496   0
  16  -7  -3 443.455 225.830   0
  16  -7  -3 567.293 239.799   3
  15   7  -3 345.401 178.451   0
  15  -7  -3 474.963 206.382   0
  15  -7  -3 168.415 180.596   3
 -14  -7   3 52.3894 120.669   2
  14  -7  -3 24.9769 107.661   0
  14   7  -3 47.6259 96.5819   0
  14  -7  -3 81.0936 116.065   3
 -13  -7   3 111.436 112.855   2
  13  -7  -3 92.8389 162.967   3
  13   7  -3 46.1450 136.278   0
  13  -7  -3 13.9856 93.2316   0
  12   7  -3 460.388 157.114   0
 -12  -7   3 480.971 179.292   2
  12  -7  -3 219.478 99.5110   0
  12  -7  -3 276.168 177.622   3
 -11  -7   3 698.071 170.328   2
  11  -7  -3 450.026 141.325   3
  11  -7  -3 688.979 215.740   0
  11   7  -3 651.989 182.040   0
 -10  -7   3 13386.3 421.994   2
  10  -7  -3 13316.1 427.185   0
  10  -7  -3 13154.9 443.726   3
  10   7  -3 14604.9 511.909   0
   9   7  -3 1653.27 292.404   0
   9  -7  -3 1920.47 247.435   0
   9  -7  -3 1562.17 204.019   3
  -9  -7   3 1849.18 220.467   2
  -8  -7   3 210.421 107.360   2
   8  -7  -3 407.581 186.525   0
   8  -7  -3 194.521 86.7214   3
   8   7  -3 357.879 168.440   0
  -7  -7   3 6347.71 274.051   2
   7   7  -3 6416.38 275.216   0
   7  -7  -3 5781.79 283.809   3
  -7   7   3 5764.85 151.026   1
   7  -7  -3 6140.49 273.693   0
  -6   7   3 3295.93 161.369   1
   6  -7  -3 3457.66 230.853   3
   6  -7  -3 2668.89 142.687   0
  -6  -7   3 3108.28 232.828   2
   6   7  -3 2904.20 159.833   0
   5   7  -3 100.210 63.1735   0
  -5   7   3 271.917 109.407   1
   5  -7  -3 148.008 86.0511   3
   5  -7  -3 131.276 68.6245   0
  -5  -7   3 166.193 100.427   2
   4  -7  -3 2961.62 156.554   0
  -4   7   3 3211.26 186.744   1
   4  -7  -3 2826.19 153.082   3
  -4  -7   3 2832.13 187.237   2
  -4  -7   3 3279.44 157.670   3
   4   7  -3 3103.74 168.251   0
  -3   7   3 34785.8 389.069   1
   3  -7  -3 33740.5 358.456   3
  -3  -7   3 33357.3 368.052   2
  -3  -7   3 33237.8 297.022   3
   3   7  -3 33009.0 283.903   0
  -2  -7   3 1660.31 126.616   3
  -2   7   3 2345.21 231.149   1
  -2  -7   3 1766.05 186.577   2
   2  -7  -3 1449.36 135.420   3
  -1   7   3 6134.65 230.764   1
  -1  -7   3 5879.50 206.547   3
   1  -7  -3 5243.37 213.022   3
  -1  -7   3 5766.96 236.613   2
   0  -7  -3 3748.07 170.425   3
   0   7   3 4502.06 241.372   1
   0  -7   3 3941.34 176.421   3
   0  -7   3 3313.38 160.921   2
   1   7   3 249.352 66.8882   0
  -1  -7  -3 237.018 83.5695   3
   1   7   3 587.968 185.031   1
   1  -7   3 256.948 87.9289   3
   1  -7   3 151.746 77.7074   2
  -1  -7  -3 547.036 110.403   2
   2   7   3 9820.35 373.492   1
   2  -7   3 8072.97 220.759   3
   2  -7   3 8263.28 279.920   2
   2  -7   3 8401.37 188.757   0
  -2  -7  -3 8330.04 151.502   2
   2   7   3 8063.42 161.611   0
   3   7   3 2403.86 244.223   1
   3  -7   3 2942.84 229.912   2
  -3  -7  -3 2565.43 100.230   2
   3  -7   3 2352.01 135.519   0
   3  -7   3 2266.00 169.170   3
   3   7   3 2571.37 176.284   0
   4   7   3 920.943 193.661   1
   4  -7   3 928.500 221.351   2
   4  -7   3 942.017 142.814   0
   4   7   3 884.956 139.486   0
   4  -7   3 1076.30 177.450   3
  -4  -7  -3 845.278 72.6959   2
   5  -7   3 117.130 71.1477   0
   5  -7   3 105.703 90.3984   2
   5   7   3 240.479 79.7532   0
   5  -7   3 267.371 138.377   3
  -5  -7  -3 245.999 53.4326   2
   5   7   3 195.033 98.2213   1
   6  -7   3 12506.3 356.496   0
   6  -7   3 12538.1 394.257   3
   6   7   3 12489.7 370.024   0
   6   7   3 11650.2 309.462   1
   7  -7   3 14060.8 410.184   3
   7  -7   3 15000.4 358.100   0
   7   7   3 15809.6 440.447   0
   7   7   3 14325.2 425.796   1
   8   7   3 3630.17 233.464   0
   8  -7   3 4523.97 293.785   0
   8  -7   3 4865.72 373.046   3
   8   7   3 3574.88 255.901   1
   9  -7   3 6748.47 364.444   0
   9  -7   3 6612.94 373.796   3
   9   7   3 7412.58 425.689   0
   9   7   3 8389.17 351.640   1
  10   7   3 2870.75 247.338   1
  10  -7   3 2570.61 314.141   3
  10  -7   3 2244.71 222.002   0
  10   7   3 1839.90 201.847   0
  11  -7   3 469.415 214.487   3
  11  -7   3 218.501 120.605   0
  11   7   3 197.776 115.384   0
  12   7   3 528.711 135.334   0
  12  -7   3 1173.61 301.506   3
  12  -7   3 583.611 163.633   0
  13  -7   3 178.874 175.162   3
  13   7   3 56.3980 102.214   0
  13  -7   3 122.820 144.251   0
  14  -7   3 74.7644 138.035   0
  14  -7   3 128.033 173.767   3
  14   7   3 39.9992 119.866   0
  15   7   3 2848.65 495.890   0
  15  -7   3 1932.72 280.768   0
  16  -7   3 1615.65 310.110   0
  17  -8  -3 1789.13 334.053   0
  17   8  -3 1803.90 393.193   0
  17  -8  -3 2343.38 407.275   3
  16  -8  -3 282.915 231.737   0
  16   8  -3 297.207 275.084   0
  16  -8  -3 216.177 195.251   3
  15  -8  -3 60.5139 135.491   0
  15   8  -3 208.586 219.683   0
  15  -8  -3 57.9736 117.580   3
  14   8  -3 1073.19 300.468   0
  14  -8  -3 1136.73 310.751   0
  14  -8  -3 736.300 229.176   3
 -13  -8   3 119.415 142.883   2
  13  -8  -3 52.7655 104.919   0
  13   8  -3 79.3337 113.933   0
  13  -8  -3-15.7569 101.481   3
 -12  -8   3 73.2284 117.803   2
  12  -8  -3 38.7838 90.1800   0
  12   8  -3-19.4470 72.8501   0
  12  -8  -3 77.5987 96.6570   3
  11  -8  -3 2141.95 274.051   3
  11  -8  -3 2400.45 259.300   0
 -11  -8   3 2518.40 249.141   2
  11   8  -3 2248.23 247.240   0
 -10  -8   3 1285.64 225.670   2
  10  -8  -3 1615.25 221.224   3
  10  -8  -3 1165.82 202.364   0
  10   8  -3 1345.25 267.525   0
   9  -8  -3 5377.75 333.091   0
  -9  -8   3 5006.69 294.535   2
   9  -8  -3 5277.87 314.473   3
   9   8  -3 4840.72 336.819   0
   8   8  -3 17189.0 427.797   0
   8  -8  -3 7878.16 370.984   3
   8  -8  -3 16866.4 413.063   0
  -8  -8   3 15731.2 438.167   2
  -7   8   3 3160.18 192.272   1
   7  -8  -3 4380.09 282.059   0
   7   8  -3 3667.71 284.481   0
   7  -8  -3 2990.24 272.110   3
  -7  -8   3 2881.71 242.506   2
  -6   8   3 2206.35 165.455   1
   6  -8  -3 2244.44 172.505   0
  -6  -8   3 2048.55 196.222   2
   6  -8  -3 2148.94 216.491   3
   6   8  -3 2794.38 256.080   0
  -5   8   3 2512.02 207.216   1
   5  -8  -3 2192.92 210.184   3
  -5  -8   3 1843.94 164.093   2
   5   8  -3 2227.50 175.500   0
   5  -8  -3 1996.07 147.826   0
   4   8  -3 1040.73 117.549   0
  -4   8   3 1115.63 157.148   1
   4  -8  -3 1017.73 146.535   3
  -4  -8   3 1231.48 146.440   3
   4  -8  -3 1035.30 125.979   0
  -4  -8   3 949.948 144.570   2
   3   8  -3 961.834 119.546   0
   3  -8  -3 866.902 108.727   0
  -3  -8   3 1023.42 146.234   2
  -3  -8   3 1084.15 150.393   3
   3  -8  -3 904.982 124.332   3
  -3   8   3 1535.12 179.009   1
   2  -8  -3 12234.7 271.547   3
  -2  -8   3 12471.3 310.017   2
  -2  -8   3 12479.8 228.989   3
  -2   8   3 13936.7 323.429   1
  -1   8   3 22016.8 368.209   1
   1  -8  -3 21584.4 385.446   3
  -1  -8   3 20198.8 279.534   3
  -1  -8   3 22280.2 403.844   2
   0  -8   3 1227.40 139.629   3
   0  -8   3 981.196 164.286   2
   0   8   3 2950.43 256.973   1
   0  -8  -3 1320.43 142.044   3
   1   8   3 21351.0 216.435   0
   1  -8   3 20102.4 281.523   3
  -1  -8  -3 22245.7 262.193   2
  -1  -8  -3 21294.3 351.141   3
   1  -8   3 20828.4 355.853   2
   1   8   3 23668.8 427.848   1
   2   8   3 3411.69 262.244   1
   2  -8   3 3392.78 145.600   0
   2  -8   3 3490.81 197.312   3
   2   8   3 3426.24 143.801   0
  -2  -8  -3 3550.86 149.504   2
   2  -8   3 3525.63 262.104   2
   3  -8   3-8.12090 43.7280   0
   3  -8   3 111.821 119.778   3
   3   8   3 202.038 162.904   1
   3   8   3 69.6818 51.9359   0
   3  -8   3 419.852 177.421   2
  -3  -8  -3 104.291 48.4352   2
   4   8   3 9704.88 372.897   1
   4  -8   3 9567.89 242.960   0
   4   8   3 9929.96 284.449   0
  -4  -8  -3 9393.42 172.698   2
   4  -8   3 10196.1 340.004   3
   4  -8   3 9045.20 343.218   2
   5  -8   3 473.737 203.340   3
   5   8   3 238.377 133.101   1
   5  -8   3 356.183 131.712   0
   5   8   3 277.227 88.6514   0
  -5  -8  -3 293.493 61.5464   2
   5  -8   3 299.385 141.839   2
   6   8   3 4208.70 336.644   1
   6   8   3 4145.00 234.148   0
   6  -8   3 4203.47 260.065   3
   6  -8   3 4622.36 266.328   0
   7   8   3 1907.20 226.390   1
   7  -8   3 2419.18 305.269   3
   7   8   3 2790.60 295.443   0
   7  -8   3 2384.60 243.752   0
   8   8   3 7914.84 385.295   0
   8   8   3 5781.15 266.013   1
   8  -8   3 7453.67 399.774   3
   8  -8   3 8712.51 394.729   0
   9  -8   3 11.2663 112.327   3
   9   8   3 96.5009 130.001   0
   9  -8   3 197.609 148.239   0
   9   8   3-21.2581 75.2863   1
  10   8   3 94.2870 110.834   0
  10  -8   3 25.3510 78.4068   0
  10  -8   3 70.9501 100.045   3
  10   8   3 448.738 210.766   1
  11  -8   3 417.376 157.696   0
  11  -8   3 716.581 193.163   3
  11   8   3 434.090 117.641   0
  12  -8   3 99.3909 177.948   3
  12   8   3 2.09959 112.227   0
  12  -8   3 262.866 210.715   0
  13  -8   3 624.988 293.712   3
  13  -8   3 352.000 195.750   0
  13   8   3 514.408 209.493   0
  14  -8   3 119.246 165.392   0
  14   8   3 113.246 162.937   0
  14  -8   3 196.400 163.862   3
  15   8   3 856.218 330.925   0
  15  -8   3 367.381 218.313   0
  16  -8   3 151.232 201.091   0
  17   9  -3 173.874 237.220   0
  17  -9  -3 120.486 143.159   3
  17  -9  -3 342.338 251.168   0
  16   9  -3 460.917 249.284   0
  16  -9  -3 793.119 337.210   0
  16  -9  -3 488.583 278.517   3
  15  -9  -3 392.247 220.358   0
  15   9  -3 296.843 169.586   0
  15  -9  -3 263.022 176.309   3
  14  -9  -3 173.174 182.482   0
  14   9  -3 127.623 118.019   0
  14  -9  -3 301.904 209.879   3
 -13  -9   3 8782.13 405.840   2
  13   9  -3 9229.08 430.342   0
  13  -9  -3 10211.6 491.189   0
  13  -9  -3 8594.11 519.262   3
  12   9  -3 581.455 182.575   0
  12  -9  -3 317.579 127.407   3
 -12  -9   3 719.445 202.267   2
  12  -9  -3 538.072 191.707   0
 -11  -9   3 48.9380 94.9711   2
  11  -9  -3 12.9065 75.3575   0
  11  -9  -3 99.2035 99.0467   3
  11   9  -3-39.2900 81.3703   0
  10   9  -3 3128.06 256.407   0
  10  -9  -3 3261.65 237.235   0
  10  -9  -3 3640.39 343.001   3
 -10  -9   3 3605.60 287.101   2
   9  -9  -3 17630.9 540.419   3
   9  -9  -3 15329.1 434.193   0
   9   9  -3 14632.9 423.812   0
  -9  -9   3 13990.8 412.594   2
  -8  -9   3 1236.88 262.041   2
   8   9  -3 1051.75 212.355   0
   8  -9  -3 1350.83 242.131   0
   8  -9  -3 1300.39 250.555   3
  -7   9   3 7175.24 235.647   1
   7  -9  -3 7142.52 409.041   3
  -7  -9   3 6278.65 315.253   2
   7  -9  -3 6906.43 258.816   0
   7   9  -3 6918.91 281.788   0
  -6   9   3 4661.57 221.593   1
   6  -9  -3 4684.07 219.949   0
   6  -9  -3 4813.25 297.508   3
   6   9  -3 4876.94 238.864   0
  -6  -9   3 4327.50 248.167   2
   5  -9  -3 584.994 140.686   3
  -5   9   3 1105.31 222.367   1
   5  -9  -3 422.461 113.491   0
   5   9  -3 685.155 142.548   0
  -5  -9   3 329.299 94.8176   2
  -5  -9   3 346.138 119.301   3
  -4   9   3 6143.39 296.673   1
  -4  -9   3 4560.34 197.981   3
   4  -9  -3 4538.86 184.925   0
   4   9  -3 4462.21 181.847   0
  -4  -9   3 4243.21 221.844   2
   4  -9  -3 4717.11 269.403   3
   3  -9  -3 2120.30 111.363   0
   3  -9  -3 1965.43 172.175   3
  -3  -9   3 2298.36 185.242   3
  -3  -9   3 2577.73 233.802   2
   3   9  -3 2140.27 130.864   0
  -2  -9   3 6947.81 219.416   3
   2  -9  -3 7022.75 262.596   3
  -2  -9   3 7566.71 316.910   2
   2   9  -3 7434.68 160.470   0
  -1   9   3 1332.37 199.498   1
   1  -9  -3 787.205 181.535   3
  -1  -9   3 748.284 195.169   2
  -1  -9   3 495.263 117.792   3
   0   9   3 7681.79 326.292   1
   0  -9   3 5477.30 179.034   3
   0  -9   3 5693.75 255.485   2
   0  -9  -3 5917.45 257.797   3
  -1  -9  -3 1434.20 134.663   2
   1   9   3 2508.24 291.599   1
  -1  -9  -3 1253.58 182.335   3
   1  -9   3 1319.93 192.471   3
   1  -9   3 1208.45 207.202   2
  -2  -9  -3 3280.80 273.745   3
   2  -9   3 3072.07 125.757   0
   2   9   3 3386.60 150.116   0
   2  -9   3 2902.48 196.426   3
   2  -9   3 3443.65 243.807   2
   2   9   3 4613.52 343.330   1
  -2  -9  -3 3151.76 144.691   2
   3   9   3 36017.0 532.138   1
   3   9   3 32877.7 328.005   0
   3  -9   3 34429.7 488.692   2
  -3  -9  -3 34234.8 296.160   2
   3  -9   3 33726.9 314.789   0
   3  -9   3 33197.0 453.180   3
   4   9   3 7284.00 376.130   1
  -4  -9  -3 7614.80 180.125   2
   4  -9   3 6664.01 315.482   2
   4   9   3 7717.05 256.843   0
   4  -9   3 5795.41 201.661   3
   4  -9   3 7318.08 226.577   0
   5  -9   3 2955.30 301.205   3
   5  -9   3 3462.17 332.191   2
  -5  -9  -3 2968.90 139.380   2
   5  -9   3 3257.31 219.601   0
   5   9   3 3201.14 241.526   0
   5   9   3 2551.60 310.389   1
   6   9   3 144.453 142.978   1
   6  -9   3 190.125 112.841   3
   6   9   3 272.724 144.345   0
   6  -9   3 323.072 169.889   0
   7  -9   3 4159.88 300.219   3
   7  -9   3 4758.30 290.473   0
   7   9   3 5090.28 337.054   0
   7   9   3 3926.06 288.604   1
   8  -9   3 181.496 191.190   3
   8  -9   3 493.768 173.340   0
   8   9   3 587.533 188.188   0
   8   9   3 17.4529 76.8337   1
   9  -9   3 800.203 168.853   3
   9  -9   3 1141.41 168.950   0
   9   9   3 1139.36 173.074   0
   9   9   3 613.910 127.074   1
  10   9   3 361.316 150.443   0
  10   9   3 349.718 129.643   1
  10  -9   3 114.929 104.781   3
  10  -9   3 242.140 115.927   0
  11   9   3 127.809 156.800   0
  11  -9   3 135.419 111.017   3
  11   9   3 231.192 151.918   1
  11  -9   3 60.5785 97.9460   0
  12  -9   3 4639.09 378.119   0
  12   9   3 4190.42 324.644   0
  12  -9   3 4525.55 459.167   3
  13  -9   3 1041.24 270.966   3
  13  -9   3 926.321 232.214   0
  13   9   3 1021.21 288.763   0
  14  -9   3 150.591 191.863   3
  14  -9   3 87.1685 163.528   0
  14   9   3 279.699 199.847   0
  15   9   3 286.644 255.397   0
  15  -9   3 322.410 219.044   0
  15  -9   3 67.0847 177.529   3
  16  -9   3 591.392 254.484   0
  16 -10  -3 269.386 180.418   0
  16  10  -3 330.643 172.061   0
  16 -10  -3 360.908 234.669   3
  15 -10  -3 1353.97 367.200   0
  15 -10  -3 693.088 303.080   3
  15  10  -3 1201.04 257.735   0
  14  10  -3 6704.16 443.846   0
  14 -10  -3 5457.05 424.330   3
  14 -10  -3 6314.24 386.701   0
  13 -10  -3 518.872 253.223   3
  13  10  -3 1290.58 277.581   0
  13 -10  -3 850.317 197.290   0
  12  10  -3 5835.96 357.651   0
  12 -10  -3 6108.14 365.944   0
  12 -10  -3 5553.27 393.511   3
 -12 -10   3 6158.16 332.344   2
  11 -10  -3 26.3224 121.800   3
  11 -10  -3-60.4037 68.9637   0
  11  10  -3-59.8820 68.9108   0
 -11 -10   3 125.995 135.893   2
  10 -10  -3 835.204 267.961   3
  10 -10  -3 70.4326 100.988   0
  10  10  -3 265.382 96.2770   0
 -10 -10   3 451.194 167.830   2
   9 -10  -3 260.905 122.951   0
   9 -10  -3 612.722 243.349   3
   9  10  -3 306.240 104.915   0
  -9 -10   3 224.403 104.524   2
   8  10  -3 1536.84 225.863   0
   8 -10  -3 1374.84 267.532   3
   8 -10  -3 1506.25 225.873   0
  -8 -10   3 1121.09 186.302   2
  -7  10   3 846.427 173.380   1
   7 -10  -3 390.573 149.467   3
   7  10  -3 265.764 121.822   0
   7 -10  -3 275.208 133.681   0
  -7 -10   3 496.914 228.483   2
  -6  10   3 9375.24 309.327   1
   6 -10  -3 9052.49 274.636   0
  -6 -10   3 7252.30 277.755   3
   6 -10  -3 8746.63 437.453   3
   6  10  -3 8433.23 297.312   0
  -6 -10   3 7036.83 272.747   2
   5 -10  -3 46112.9 594.063   3
  -5 -10   3 42177.4 552.139   2
  -5  10   3 43083.8 504.175   1
   5  10  -3 43796.8 433.483   0
   5 -10  -3 43471.8 381.013   0
  -5 -10   3 40488.9 437.152   3
   4 -10  -3 28603.3 290.115   0
   4  10  -3 29154.9 327.451   0
   4 -10  -3 31434.4 500.365   3
  -4 -10   3 29016.7 394.259   3
  -4 -10   3 29097.8 459.736   2
   3 -10  -3 7402.10 308.472   3
  -3 -10   3 6693.41 276.074   2
   3  10  -3 6484.06 163.628   0
   3 -10  -3 6685.62 153.978   0
  -3 -10   3 6205.53 208.323   3
   2 -10  -3 185.390 133.477   3
  -2 -10   3 451.856 209.538   2
  -2 -10   3 262.546 112.089   3
   2  10  -3 219.020 64.3271   0
   1 -10  -3 4788.65 264.947   3
  -1 -10   3 4820.78 210.785   3
  -1 -10   3 4288.52 238.539   2
   0 -10  -3 4414.13 251.099   3
   0 -10  -3 4132.00 234.990   2
   0 -10   3 3744.56 220.206   3
   0 -10   3 3603.53 218.834   2
   1 -10   3 10470.0 284.087   3
   1  10   3 13086.9 379.443   1
  -1 -10  -3 10385.1 320.922   3
  -1 -10  -3 10320.3 236.000   2
   1 -10   3 10555.6 326.834   2
   2  10   3 19583.2 231.058   0
   2  10   3 23513.6 484.693   1
   2 -10   3 25768.0 515.923   2
   2 -10   3 21481.5 411.320   3
  -2 -10  -3 20956.6 300.871   2
  -2 -10  -3 19993.9 426.089   3
   3 -10   3 6098.05 248.550   3
   3  10   3 6375.31 204.551   0
   3  10   3 6854.87 384.223   1
   3 -10   3 6625.50 196.431   0
  -3 -10  -3 6979.85 212.202   2
   3 -10   3 6753.28 372.430   2
  -3 -10  -3 5903.04 314.500   3
   4  10   3 14628.2 427.445   1
   4 -10   3 12659.2 250.372   0
  -4 -10  -3 14515.9 263.349   2
   4  10   3 14214.3 286.265   0
   4 -10   3 13613.5 374.167   3
   4 -10   3 14236.8 443.939   2
   5 -10   3 12683.1 426.934   3
   5  10   3 11987.6 319.447   0
   5  10   3 11984.0 432.295   1
   5 -10   3 11667.1 293.095   0
   5 -10   3 13499.7 487.384   2
   6  10   3 1091.53 316.877   1
   6 -10   3 822.048 167.744   0
   6 -10   3 635.956 199.667   3
   6  10   3 797.954 159.619   0
   7 -10   3 1132.93 248.475   3
   7  10   3 1169.90 274.022   1
   7  10   3 1283.52 220.781   0
   7 -10   3 1575.85 212.681   0
   8  10   3 2310.29 235.222   1
   8 -10   3 3677.63 290.684   0
   8 -10   3 3030.76 356.397   3
   8  10   3 3265.69 282.975   0
   9 -10   3-48.2280 75.8602   3
   9  10   3 25.2423 73.1075   0
   9 -10   3 15.7897 70.6137   0
   9  10   3-33.4011 86.2861   1
  10 -10   3 544.851 155.410   0
  10 -10   3 112.489 113.696   3
  10  10   3 304.381 145.542   0
  10  10   3 44.6101 110.872   1
  11  10   3 7955.35 425.234   0
  11 -10   3 7865.91 414.067   0
  11 -10   3 7923.06 526.635   3
  11  10   3 8120.37 409.748   1
  12 -10   3 2486.24 389.344   3
  12 -10   3 3091.78 345.278   0
  12  10   3 2489.83 296.222   0
  13  10   3 127.566 173.291   0
  13 -10   3 210.745 213.535   3
  13 -10   3 74.2853 100.077   0
  14 -10   3 542.164 335.119   3
  14 -10   3 550.093 268.660   0
  14  10   3 503.949 278.512   0
  15  10   3 121.613 174.393   0
  16 -11  -3 95.8407 183.346   3
  16  11  -3 519.316 279.106   0
  15 -11  -3 184.960 211.799   3
  15  11  -3 74.8639 142.004   0
  14  11  -3 687.902 258.613   0
  14 -11  -3 77.3251 118.537   3
  13  11  -3 9408.45 436.443   0
  13 -11  -3 7108.66 439.781   3
  12 -11  -3 2062.82 295.615   3
  12  11  -3 2419.99 273.183   0
  12 -11  -3 2349.82 263.406   0
 -12 -11   3 1623.80 249.611   2
  11 -11  -3 121.997 126.239   3
  11  11  -3 25.0879 100.580   0
  11 -11  -3 5.51376 65.5743   0
 -11 -11   3 317.030 179.066   2
  10  11  -3 315.821 101.219   0
  10 -11  -3 708.684 245.831   3
  10 -11  -3 147.971 114.525   0
 -10 -11   3 806.043 217.410   2
   9  11  -3-15.4713 67.4612   0
   9 -11  -3 91.1984 77.8192   0
   9 -11  -3 51.9557 176.448   3
  -9 -11   3 181.774 124.087   2
   8 -11  -3 795.507 221.161   3
   8 -11  -3 645.282 122.191   0
   8  11  -3 517.451 90.8840   0
  -8 -11   3 686.147 163.925   2
  -7 -11   3 9614.89 331.990   3
   7  11  -3 10142.2 336.231   0
  -7 -11   3 9909.33 382.924   2
   7 -11  -3 10275.1 305.669   0
   7 -11  -3 9635.09 402.470   3
  -7  11   3 10975.9 325.518   1
  -6  11   3 14437.1 380.264   1
  -6 -11   3 10845.6 378.089   2
   6  11  -3 10854.9 311.328   0
   6 -11  -3 12383.5 479.446   3
   6 -11  -3 11078.2 305.036   0
  -6 -11   3 11527.3 357.349   3
   5 -11  -3 1551.89 162.154   0
   5  11  -3 1431.00 135.785   0
  -5 -11   3 1437.88 179.789   3
  -5 -11   3 1658.86 236.166   2
   5 -11  -3 2761.50 284.766   3
   4  11  -3 10212.1 248.577   0
   4 -11  -3 9534.53 193.968   0
  -4 -11   3 8951.02 280.789   3
   4 -11  -3 11384.1 453.201   3
  -4 -11   3 10169.1 406.415   2
   3 -11  -3 11636.0 316.846   3
   3  11  -3 12201.7 220.876   0
  -3 -11   3 12053.4 322.667   3
  -3 -11   3 12424.8 392.620   2
   2  11  -3 154.144 51.7528   0
   2 -11  -3 398.378 196.522   3
  -2 -11   3 136.479 108.248   3
  -2 -11   3 49.4089 133.736   2
  -1 -11   3 251.591 91.6491   2
   1 -11  -3 504.640 149.203   3
   1  11  -3 522.628 69.8068   0
  -1 -11   3 516.736 164.361   3
   0 -11  -3-5.09557 49.6915   2
   0 -11   3 46.8865 73.2970   3
   0 -11  -3 71.2144 86.4924   3
   0 -11   3 82.9052 103.241   2
   1 -11   3 397.401 158.421   3
   1  11   3 2311.53 286.267   1
   1 -11   3 566.982 212.150   2
  -1 -11  -3 472.925 143.702   2
  -1 -11  -3 502.065 150.583   3
   2  11   3 13954.4 473.173   1
   2  11   3 10447.0 193.708   0
  -2 -11  -3 10975.1 275.352   2
   2 -11   3 10853.7 370.986   3
  -2 -11  -3 10275.5 397.320   3
   2 -11   3 11121.3 416.332   2
   3  11   3 16269.8 488.010   1
  -3 -11  -3 12700.1 379.258   3
   3 -11   3 12197.0 348.294   3
   3  11   3 13318.2 231.025   0
   3 -11   3 12083.7 405.116   2
  -3 -11  -3 13348.9 282.084   2
   4 -11   3 3453.21 391.271   2
   4  11   3 2689.28 183.098   0
   4 -11   3 2864.76 281.568   3
   4  11   3 3853.13 341.398   1
  -4 -11  -3 2619.24 157.389   2
   4 -11   3 3395.40 191.503   0
   5 -11   3 2661.73 198.751   0
   5  11   3 3050.37 232.047   0
   5 -11   3 2367.98 280.663   3
   5 -11   3 4197.20 359.249   2
   5  11   3 4717.50 436.791   1
   6  11   3 5416.39 438.971   1
   6  11   3 5168.69 303.296   0
   6 -11   3 4431.90 244.114   0
   6 -11   3 4904.66 342.602   3
   7  11   3 25.9655 92.7624   1
   7 -11   3 61.0527 63.5717   0
   7  11   3 70.4811 86.3762   0
   7 -11   3 27.8561 104.215   3
   8  11   3 2620.41 233.110   0
   8 -11   3 2556.66 241.892   0
   8 -11   3 2724.76 346.091   3
   8  11   3 1962.24 216.485   1
   9 -11   3 146.893 131.279   3
   9  11   3 66.6805 117.789   0
   9 -11   3 86.7516 75.1916   0
   9  11   3 54.8297 117.293   1
  10 -11   3 1213.55 186.121   0
  10  11   3 501.004 182.570   1
  10  11   3 944.556 182.815   0
  10 -11   3 1038.49 185.477   3
  11 -11   3 729.056 280.295   3
  11  11   3 165.726 130.602   1
  11  11   3 49.7881 117.688   0
  11 -11   3 99.5984 139.752   0
  12 -11   3 3366.43 396.855   3
  12  11   3 2837.34 306.778   0
  13  11   3 1386.85 262.364   0
  13 -11   3 1075.44 352.504   3
  14 -11   3 129.202 218.318   3
  14  11   3 67.5746 190.873   0
  15  11   3 144.189 188.954   0
  15  12  -3 881.610 326.754   0
  15 -12  -3 366.726 250.669   3
  14 -12  -3 1237.46 334.808   3
  14  12  -3 1418.57 287.115   0
  13 -12  -3 55.7015 165.347   3
  13  12  -3 104.726 159.080   0
  12 -12  -3 1535.74 290.910   3
  12  12  -3 2130.82 236.407   0
  11  12  -3 457.196 186.477   0
  11 -12  -3 171.538 148.704   3
 -11 -12   3 475.297 175.329   2
 -10 -12   3 456.356 181.215   2
  10  12  -3 84.8566 101.432   0
  10 -12  -3 528.049 180.923   3
  -9 -12   3 106.761 92.1817   2
   9 -12  -3 187.312 147.583   3
   9  12  -3-32.3538 79.0825   0
  -8 -12   3 1840.19 241.322   2
   8  12  -3 1381.51 196.275   0
  -8 -12   3 1736.65 251.543   3
   8 -12  -3 1502.70 310.616   3
   7 -12  -3 332.096 188.249   3
  -7 -12   3 483.020 159.891   3
   7  12  -3 373.280 100.279   0
  -7 -12   3 547.723 186.662   2
  -6  12   3 1900.54 257.163   1
   6 -12  -3 792.605 242.735   3
   6  12  -3 219.645 83.1403   0
  -6 -12   3 218.207 139.373   3
  -6 -12   3 167.910 133.149   2
   5 -12  -3 5113.57 299.407   3
  -5 -12   3 4606.60 275.383   3
  -5 -12   3 5069.54 320.316   2
  -4 -12   3 790.638 158.498   3
  -4 -12   3 952.061 205.477   2
   4 -12  -3 616.930 161.293   3
  -3 -12   3 2741.62 325.803   2
  -3 -12   3 2218.34 207.439   3
   3 -12  -3 2485.05 229.529   3
   2 -12  -3 1861.08 284.999   3
  -2 -12   3 1229.09 141.423   2
  -2 -12   3 1627.78 203.772   3
  -1 -12   3 818.425 126.077   2
  -1 -12   3 1640.30 215.676   3
   1 -12  -3 1993.17 288.162   3
   0 -12  -3 586.966 198.303   2
   0 -12   3 443.383 154.981   3
   0 -12  -3 311.760 107.603   3
   0 -12   3 403.617 191.966   2
   1 -12   3 5401.51 308.074   3
  -1 -12  -3 5746.60 313.037   2
   1 -12   3 4870.84 331.887   2
  -1 -12  -3 5364.64 368.159   3
   2 -12   3 5321.68 284.376   3
   2  12   3 7198.52 447.361   1
  -2 -12  -3 5222.94 260.326   2
  -2 -12  -3 4759.48 305.918   3
   2 -12   3 4715.16 307.100   2
   3  12   3 1098.27 320.231   1
   3 -12   3 51.2949 86.6160   3
  -3 -12  -3 101.161 93.1362   2
  -3 -12  -3 156.778 152.911   3
   3 -12   3 17.7625 103.612   2
   4 -12   3 2595.90 339.064   2
   4  12   3 3379.99 305.885   1
   4  12   3 2358.30 163.348   0
  -4 -12  -3 3525.96 432.663   3
   4 -12   3 2708.34 298.659   3
   5 -12   3 7664.73 405.229   2
   5  12   3 10266.0 519.342   1
   5 -12   3 7270.98 411.992   3
   5  12   3 7962.84 288.808   0
   6  12   3 142.384 103.110   0
   6 -12   3 299.589 231.145   3
   6  12   3 733.733 280.436   1
   7  12   3 71.5993 152.860   1
   7 -12   3 85.3049 120.331   3
   7  12   3 49.1896 78.9949   0
   8  12   3 62.1772 112.391   1
   8 -12   3 271.622 195.450   3
   8  12   3 160.231 123.295   0
   9  12   3 941.854 182.320   1
   9  12   3 1178.29 207.293   0
   9 -12   3 1526.67 269.537   3
  10  12   3 890.475 221.572   0
  10 -12   3 1073.72 311.464   3
  10  12   3 824.412 252.715   1
  11  12   3 5547.72 375.830   0
  11 -12   3 7209.93 508.006   3
  11  12   3 5565.36 387.393   1
  12 -12   3 959.888 327.130   3
  12  12   3 608.766 266.740   0
  13  12   3 914.252 292.090   0
  13 -12   3 479.775 244.333   3
  14 -12   3 392.484 296.098   3
  14  12   3 893.025 344.529   0
  15 -13  -3 802.885 342.341   3
  14 -13  -3 561.692 249.569   3
  13 -13  -3 2526.49 414.174   3
  12 -13  -3 171.186 183.649   3
  11 -13  -3 79.9105 111.039   3
 -10 -13   3 242.726 182.030   2
  10 -13  -3 549.992 282.849   3
   9 -13  -3 158.589 190.161   3
  -9 -13   3 389.686 173.963   3
  -9 -13   3 160.641 125.958   2
  -8 -13   3 985.339 231.938   3
   8 -13  -3 845.762 276.668   3
  -8 -13   3 583.508 185.185   2
   7 -13  -3 3820.44 289.973   3
  -7 -13   3 3780.72 291.208   2
  -7 -13   3 3747.13 274.776   3
  -6  13   3 10146.3 382.973   1
   6 -13  -3 8136.38 376.961   3
  -6 -13   3 8390.30 343.223   3
  -6 -13   3 8104.30 367.101   2
  -5 -13   3 2608.17 258.034   2
  -5 -13   3 2601.90 236.956   3
   5 -13  -3 2666.47 278.719   3
  -4 -13   3 5025.80 273.466   3
   4 -13  -3 5150.25 312.827   3
  -4 -13   3 5954.52 368.068   2
   3 -13  -3 1263.05 227.063   3
  -3 -13   3 1048.72 177.316   3
  -3 -13   3 929.201 190.601   2
   2 -13  -3 319.528 193.232   3
  -2 -13   3 326.979 187.742   3
  -2 -13   3 52.8068 80.4462   2
  -1 -13   3 5424.62 355.029   3
   1 -13  -3 6725.68 407.769   3
  -1 -13   3 4568.15 297.730   2
   0 -13  -3 2124.98 256.338   2
   0 -13   3 1291.73 228.113   3
   0 -13  -3 1833.06 291.085   3
   0 -13   3 1574.10 311.402   2
   1 -13   3 180.925 208.632   2
   1 -13   3 482.422 169.527   3
  -1 -13  -3 896.586 334.884   3
  -1 -13  -3 877.766 193.984   2
  -2 -13  -3 3149.17 221.012   2
   2  13   3 4671.28 392.345   1
   2 -13   3 3146.25 306.737   3
   2 -13   3 2260.72 252.031   2
  -2 -13  -3 2891.93 284.276   3
   3  13   3 9642.52 507.907   1
   3 -13   3 6567.57 386.148   2
  -3 -13  -3 6587.30 394.636   3
   3 -13   3 7209.51 390.458   3
  -3 -13  -3 6089.33 242.972   2
   4  13   3 17302.1 560.339   1
  -4 -13  -3 13596.4 523.493   3
   4 -13   3 13556.0 545.010   2
   4 -13   3 13650.3 516.900   3
   5  13   3 1594.82 298.826   1
   5 -13   3 877.788 246.580   3
   5 -13   3 1055.50 274.544   2
  -5 -13  -3 689.650 224.074   3
   6  13   3 5333.45 451.816   1
   6 -13   3 4033.37 288.089   3
   7 -13   3 627.847 180.030   3
   7  13   3 649.697 226.266   1
   8 -13   3 3201.25 363.643   3
   8  13   3 2730.67 334.536   1
   9  13   3 44.1138 150.179   1
   9 -13   3 98.4106 166.573   3
  10 -13   3 1097.71 378.043   3
  10  13   3 915.722 220.957   1
  11 -13   3 254.892 202.030   3
  11  13   3 82.4090 119.054   1
  12 -13   3 3584.45 434.871   3
  13 -13   3 594.504 241.556   3
  14 -14  -3 1186.71 365.307   3
  13 -14  -3 74.3419 118.075   3
  12 -14  -3 145.956 157.577   3
 -11 -14   3-7.29263 89.6060   3
  11 -14  -3 33.5402 125.018   3
 -10 -14   3 51.1448 92.4403   2
  10 -14  -3 191.921 182.625   3
 -10 -14   3 67.2706 104.290   3
   9 -14  -3 691.437 237.390   3
  -9 -14   3 878.343 185.636   3
  -9 -14   3 652.808 198.229   2
   8 -14  -3 751.746 280.634   3
  -8 -14   3 612.764 158.859   3
  -8 -14   3 660.012 182.952   2
  -7 -14   3 30.9632 87.2578   3
   7 -14  -3 38.4813 123.659   3
  -7 -14   3 36.2484 80.6591   2
  -6  14   3 320.417 142.422   1
  -6 -14   3 124.031 138.648   3
  -6 -14   3 29.4270 87.6106   2
   6 -14  -3 72.5985 99.5352   3
   5 -14  -3 4406.81 353.279   3
  -5 -14   3 3670.54 239.474   3
  -5 -14   3 4282.52 328.312   2
   4 -14  -3 1484.21 238.593   3
  -4 -14   3 2069.24 247.321   3
  -4 -14   3 1496.19 231.094   2
   3 -14  -3 583.909 195.285   3
  -3 -14   3 599.163 140.589   2
  -3 -14   3 783.712 212.474   3
   2 -14  -3 292.420 171.300   3
  -2 -14   3 433.708 167.066   3
  -2 -14   3 175.778 112.646   2
   1 -14  -3 486.267 246.509   3
  -1 -14   3 95.5972 109.068   2
  -1 -14   3 284.750 161.490   3
   0 -14   3 810.478 168.860   3
   0 -14  -3 1516.74 251.393   2
   0 -14  -3 1340.85 207.536   3
   0 -14   3 1204.92 304.097   2
  -1 -14  -3 218.497 139.322   2
  -1 -14  -3 80.5446 132.034   3
   1 -14   3 118.162 137.413   3
   1 -14   3 142.806 168.796   2
   2  14   3 1004.91 275.529   1
  -2 -14  -3 225.862 174.415   3
   2 -14   3 101.402 117.473   3
  -2 -14  -3 168.746 89.2366   2
   2 -14   3 182.109 164.992   2
   3  14   3 5116.43 380.824   1
   3 -14   3 4253.46 354.040   2
   3 -14   3 3450.91 295.132   3
  -3 -14  -3 3595.90 338.961   3
   4  14   3 3542.74 418.043   1
  -4 -14  -3 2427.34 301.067   3
   4 -14   3 2634.91 295.559   2
   4 -14   3 1986.37 301.477   3
   5  14   3 1260.35 326.449   1
  -5 -14  -3 917.342 226.035   3
   5 -14   3 665.405 216.538   3
   5 -14   3 1171.21 272.556   2
   6  14   3 33.6332 135.878   1
   6 -14   3-42.1710 83.8794   3
  -6 -14  -3 46.1858 104.597   3
   7  14   3 691.326 177.630   1
   7 -14   3 860.123 260.098   3
   8  14   3 735.333 217.486   1
   8 -14   3 509.988 250.210   3
   9  14   3 159.756 210.193   1
   9 -14   3 209.493 215.181   3
  10  14   3 142.987 134.093   1
  10 -14   3 47.1056 107.042   3
  11 -14   3 867.590 304.615   3
  11  14   3 1017.55 297.567   1
  12 -14   3 150.535 178.632   3
  13 -14   3 178.491 193.792   3
  14 -15  -3 64.5703 162.538   3
  13 -15  -3 172.691 186.093   3
  12 -15  -3 7.10518 111.190   3
  11 -15  -3 551.654 263.577   3
 -10 -15   3 2743.40 309.020   3
  10 -15  -3 2600.08 385.838   3
  -9 -15   3 6420.47 380.085   3
   9 -15  -3 6501.13 463.358   3
  -9 -15   3 6635.09 430.539   2
  -8 -15   3 85.5848 126.322   3
   8 -15  -3 64.2641 146.407   3
  -8 -15   3 60.3592 116.255   2
  -7 -15   3 200.641 120.107   3
   7 -15  -3 200.832 184.725   3
  -7 -15   3 499.969 193.126   2
   6 -15  -3 1805.05 274.455   3
  -6 -15   3 2036.30 255.048   3
  -6  15   3 2253.35 263.459   1
  -6 -15   3 1992.50 296.190   2
  -5 -15   3 291.847 129.509   3
   5 -15  -3 399.889 206.095   3
  -5 -15   3 340.227 148.911   2
   4 -15  -3 221.664 147.805   3
  -4 -15   3 135.809 114.084   2
  -4 -15   3 139.123 123.976   3
  -3 -15   3 1258.87 211.185   3
   3 -15  -3 1167.02 216.001   3
  -3 -15   3 1177.84 204.921   2
   2 -15  -3 174.733 115.895   3
  -2 -15   3 298.563 150.503   3
  -2 -15   3 230.693 157.460   2
  -1 -15   3 1694.08 280.980   3
  -1 -15   3 1566.30 296.329   2
   1 -15  -3 1767.48 323.486   3
   0 -15  -3 12392.6 445.097   3
   0 -15   3 11887.2 494.704   2
   0 -15   3 11514.2 398.732   3
  -1 -15  -3 1422.69 299.025   3
   1 -15   3 1812.05 252.154   3
  -1 -15  -3 2135.50 297.989   2
   1 -15   3 1202.17 295.084   2
   2  15   3 180.012 140.240   1
  -2 -15  -3 410.825 156.654   2
   2 -15   3 232.812 145.092   3
  -2 -15  -3 62.8598 103.429   3
   2 -15   3 384.258 282.881   2
   3 -15   3 3357.05 342.538   3
   3  15   3 4125.35 366.317   1
  -3 -15  -3 3658.62 357.346   3
   3 -15   3 3407.38 339.362   2
   4  15   3 374.091 179.169   1
  -4 -15  -3 209.417 159.813   3
   4 -15   3 169.623 140.857   2
   4 -15   3 24.2073 77.7404   3
   5  15   3 518.347 253.688   1
   5 -15   3 4.77654 93.7260   3
   5 -15   3 86.5796 135.222   2
  -5 -15  -3 218.910 195.581   3
   6 -15   3 895.246 207.383   3
   6  15   3 3122.30 430.020   1
  -6 -15  -3 2423.29 294.601   3
   7 -15   3 4216.07 455.706   3
   7  15   3 4653.93 383.358   1
  -7 -15  -3 4916.80 463.483   3
  -8 -15  -3-5.89868 105.210   3
   8  15   3 214.187 198.563   1
   8 -15   3 142.959 119.202   3
   9 -15   3 846.013 238.692   3
   9  15   3 1027.38 280.191   1
  10  15   3 93.9470 132.061   1
  10 -15   3 93.5711 183.866   3
  11 -15   3 156.497 204.210   3
  11  15   3 46.9253 120.665   1
  12 -15   3 467.814 246.500   3
  13 -16  -3 252.242 222.578   3
  12 -16  -3 43.5187 113.934   3
  11 -16  -3 2115.52 378.857   3
  10 -16  -3 232.258 158.245   3
  -9 -16   3 1965.29 290.962   3
   9 -16  -3 1194.57 282.630   3
   8 -16  -3 7625.85 553.920   3
  -8 -16   3 6275.00 401.419   2
  -8 -16   3 5994.52 343.506   3
   7 -16  -3 299.987 165.540   3
  -7 -16   3 93.6762 109.478   3
  -7 -16   3 66.9108 112.267   2
   6 -16  -3 332.610 184.380   3
  -6 -16   3 324.216 163.658   3
  -6  16   3 836.797 246.755   1
  -6 -16   3 44.1715 115.594   2
   5 -16  -3 2160.55 314.768   3
  -5 -16   3 2028.09 240.649   3
  -5 -16   3 1927.35 241.182   2
   4 -16  -3 54.8486 104.740   3
  -4 -16   3 70.6632 116.880   2
  -4 -16   3 51.6807 114.029   3
  -3 -16   3 1975.76 237.764   2
   3 -16  -3 1938.95 310.070   3
  -3 -16   3 1986.15 291.951   3
   2 -16  -3 8164.64 423.063   3
  -2 -16   3 9135.34 451.212   2
  -2 -16   3 8909.78 407.136   3
   1 -16  -3 12023.7 473.821   3
  -1 -16   3 11605.7 475.414   2
  -1 -16   3 11134.3 456.998   3
   0 -16   3 1489.16 301.203   2
   0 -16   3 747.378 219.791   3
   0 -16  -3 957.780 250.655   3
   1  16   3 10849.0 521.491   1
   1 -16   3 7958.70 388.848   3
   1 -16   3 8924.62 535.715   2
  -1 -16  -3 8440.29 512.504   3
  -1 -16  -3 7603.94 334.641   2
   2  16   3 589.549 238.685   1
   2 -16   3 177.510 123.454   3
  -2 -16  -3 203.225 179.844   3
   2 -16   3-4.40094 78.3153   2
  -3 -16  -3 135.446 103.625   3
   3  16   3 636.159 259.792   1
   3 -16   3 49.8625 134.449   3
   3 -16   3-1.49306 90.8802   2
   4 -16   3 1970.81 369.903   2
   4  16   3 2449.65 325.058   1
   4 -16   3 1399.03 250.122   3
  -4 -16  -3 1673.14 277.857   3
   5  16   3 186.487 135.178   1
   5 -16   3 235.738 222.648   2
   5 -16   3 28.0024 95.3730   3
  -5 -16  -3 37.0217 119.026   3
   6  16   3 1352.17 398.139   1
   6 -16   3 27.8567 122.088   3
  -6 -16  -3 984.835 259.190   3
   7 -16   3 4181.26 478.920   3
   7  16   3 4212.84 475.664   1
  -7 -16  -3 3290.01 397.923   3
   8  16   3 4825.90 514.181   1
  -8 -16  -3 4235.83 422.373   3
   8 -16   3 4376.59 431.871   3
   9  16   3 992.885 314.459   1
   9 -16   3 687.568 328.740   3
  -9 -16  -3 614.362 200.874   3
  10  16   3 116.454 168.849   1
  10 -16   3 131.468 175.976   3
 -10 -16  -3 65.0212 153.896   3
  11 -16   3 93.1074 169.441   3
  11  16   3 74.8665 151.342   1
  12 -16   3 165.051 166.525   3
  12 -17  -3 403.766 301.883   3
  11 -17  -3 209.200 155.500   3
  10 -17  -3 1095.95 270.575   3
   9 -17  -3 1231.16 289.878   3
  -8 -17   3 59.8657 114.469   2
  -8 -17   3 48.8587 99.6825   3
   8 -17  -3 148.985 199.112   3
   7 -17  -3 722.622 204.115   3
  -7 -17   3 786.619 175.430   2
  -7 -17   3 554.828 172.740   3
  -6  17   3 233.711 161.122   1
  -6 -17   3 112.122 104.809   3
   6 -17  -3 118.250 107.628   3
  -6 -17   3 83.8767 134.748   2
  -5  17   3 1093.90 304.732   1
   5 -17  -3 77.1542 127.778   3
  -5 -17   3 368.246 181.972   3
  -5 -17   3 322.552 172.419   2
   4 -17  -3 105.496 134.665   3
  -4 -17   3 52.1663 114.298   2
  -4 -17   3 118.368 150.256   3
   3 -17  -3 2518.48 312.848   3
  -3 -17   3 3472.46 438.025   2
  -3 -17   3 3595.70 322.302   3
  -2 -17   3 577.855 215.116   3
  -2 -17   3 433.994 230.283   2
   2 -17  -3 656.641 249.104   3
  -1 -17   3 953.002 272.232   2
   1 -17  -3 427.177 192.393   3
  -1 -17   3 454.433 155.888   3
   0 -17   3 4179.89 321.505   3
   0 -17   3 4997.88 422.586   2
   0 -17  -3 4302.64 416.172   3
  -1 -17  -3 214.104 157.359   2
   1  17   3 1308.60 288.538   1
   1 -17   3 650.708 237.582   3
  -1 -17  -3 94.3663 153.516   3
   1 -17   3 218.521 185.462   2
   2  17   3 1385.07 350.495   1
   2 -17   3 251.128 110.893   2
   2 -17   3 477.915 191.385   3
  -2 -17  -3 503.368 192.353   3
   3 -17   3 64.2782 105.671   3
   3  17   3 485.353 258.857   1
  -3 -17  -3 231.143 202.309   3
   3 -17   3 86.6552 129.412   2
   4  17   3 1016.49 312.564   1
  -4 -17  -3 18.0955 90.7512   3
   4 -17   3 121.421 220.210   2
   4 -17   3 311.253 182.392   3
   5  17   3 257.369 242.002   1
   5 -17   3 135.570 189.257   2
  -5 -17  -3 24.2955 97.2829   3
   5 -17   3-4.65310 99.1954   3
   6 -17   3 3747.68 397.685   3
   6  17   3 6159.14 532.607   1
  -6 -17  -3 5341.32 459.136   3
   7  17   3 2576.23 440.479   1
   7 -17   3 1894.59 320.590   3
  -7 -17  -3 2047.22 368.512   3
  -8 -17  -3 150.737 164.127   3
   8  17   3 137.492 169.087   1
   8 -17   3 477.593 322.920   3
   9  17   3 776.303 283.596   1
  -9 -17  -3 632.922 210.482   3
   9 -17   3 511.121 215.648   3
 -10 -17  -3 563.688 221.487   3
  10 -17   3 173.838 163.651   3
  10  17   3 630.924 300.580   1
  11 -17   3 76.1720 139.638   3
  11  17   3 44.7303 99.7671   1
 -11 -17  -3 164.283 194.490   3
  11 -18  -3 839.726 216.989   3
  10 -18  -3 383.321 153.258   3
   9 -18  -3 365.105 206.670   3
   8 -18  -3 2559.96 390.208   3
   7 -18  -3 156.964 144.507   3
  -7 -18   3 145.826 154.115   3
  -7 -18   3 237.363 141.006   2
   6 -18  -3 133.287 153.843   3
  -6 -18   3 683.246 243.105   3
  -6 -18   3 35.5471 113.843   2
  -5 -18   3 141.177 158.527   2
  -5  18   3 437.867 243.855   1
   5 -18  -3 125.096 117.725   3
  -5 -18   3 199.608 146.179   3
  -4  18   3 423.130 225.097   1
   4 -18  -3 116.148 209.889   3
  -4 -18   3 165.016 133.358   2
  -4 -18   3 247.137 166.068   3
   3 -18  -3 554.234 196.840   3
  -3 -18   3 622.543 209.852   2
  -3 -18   3 455.588 186.913   3
   2 -18  -3 5208.94 429.845   3
  -2 -18   3 5101.10 399.282   2
  -2 -18   3 4146.67 326.968   3
  -1 -18   3 2407.85 321.324   2
  -1  18   3 5419.42 440.529   1
  -1 -18   3 2620.46 315.394   3
   1 -18  -3 3105.75 378.441   3
   0  18   3 592.252 275.701   1
   0 -18   3 131.175 161.787   2
   0 -18  -3 139.794 131.366   3
   0 -18   3 6.71842 63.2639   3
   1  18   3 4814.53 487.729   1
  -1 -18  -3 3495.18 391.665   3
   1 -18   3 2284.21 353.434   2
   1 -18   3 3040.38 363.876   3
   2  18   3 2324.19 398.986   1
  -2 -18  -3 1609.00 267.276   3
   2 -18   3 1419.74 294.686   3
   2 -18   3 1384.03 328.256   2
   3 -18   3 363.263 235.761   3
   3  18   3 198.602 206.145   1
  -3 -18  -3 149.113 164.712   3
   3 -18   3 173.279 128.788   2
   4  18   3 1119.35 294.471   1
   4 -18   3 378.145 192.780   3
  -4 -18  -3 134.370 156.208   3
   4 -18   3 326.012 174.005   2
   5  18   3 1091.53 286.393   1
   5 -18   3 885.898 244.539   3
   5 -18   3 1307.72 373.185   2
  -5 -18  -3 414.319 234.874   3
   6  18   3 44.4980 181.516   1
  -6 -18  -3 152.036 172.935   3
   6 -18   3 28.2235 126.860   3
   7  18   3 2349.55 430.821   1
   7 -18   3 3108.48 452.263   3
  -7 -18  -3 2614.51 449.218   3
  -8 -18  -3 2898.69 346.178   3
   8  18   3 4281.33 572.277   1
   8 -18   3 2934.45 381.203   3
   9 -18   3 371.366 243.726   3
   9  18   3 191.601 235.668   1
  -9 -18  -3 189.567 206.234   3
  10  18   3 305.065 229.148   1
  10 -18   3 259.429 192.858   3
 -10 -18  -3 262.101 190.006   3
  11  18   3 44.8078 154.355   1
  10 -19  -3 292.977 231.446   3
   9 -19  -3 288.649 218.224   3
   8 -19  -3 173.485 191.900   3
  -7 -19   3 885.637 263.283   3
  -7 -19   3 149.694 161.042   2
   7 -19  -3 94.2401 170.612   3
  -6 -19   3 190.678 167.972   3
   6 -19  -3 40.4480 134.071   3
  -6 -19   3 33.1384 100.400   2
  -5  19   3 51.8108 121.484   1
  -5 -19   3 134.948 173.872   3
   5 -19  -3 135.616 127.700   3
  -5 -19   3 79.5467 142.439   2
  -4  19   3 149.679 159.466   1
   4 -19  -3 51.4826 136.497   3
  -4 -19   3 46.5435 115.652   2
  -4 -19   3 105.152 123.046   3
  -3  19   3 619.870 253.418   1
   3 -19  -3 668.293 265.167   3
  -3 -19   3 486.077 231.012   2
  -3 -19   3 566.153 187.250   3
   2 -19  -3 173.500 177.049   3
  -2  19   3 893.523 285.058   1
  -2 -19   3 16.6526 103.696   3
  -2 -19   3 70.8270 99.1494   2
  -1  19   3 2220.90 373.909   1
  -1 -19   3 863.721 211.070   3
  -1 -19   3 789.063 206.716   2
   1 -19  -3 1100.93 251.384   3
   0 -19   3 942.828 223.132   2
   0  19   3 2516.52 460.589   1
   0 -19  -3 936.261 243.593   3
   0 -19   3 466.902 199.704   3
   1  19   3 503.176 288.234   1
   1 -19   3 157.807 123.903   3
  -1 -19  -3 119.558 171.680   3
   1 -19   3 83.8369 125.714   2
   2  19   3 328.119 302.875   1
  -2 -19  -3 258.204 204.913   3
   2 -19   3 51.9828 114.462   3
   2 -19   3 168.450 189.820   2
   3 -19   3 170.582 183.646   2
   3 -19   3 112.625 130.909   3
  -3 -19  -3 39.2889 100.467   3
   3  19   3 140.754 201.865   1
  -4 -19  -3 96.3442 152.510   3
   4 -19   3 310.002 214.749   2
   4 -19   3 84.2519 167.602   3
   4  19   3 64.7707 158.076   1
   5  19   3 217.297 272.653   1
  -5 -19  -3 185.608 164.669   3
   5 -19   3 209.282 182.207   3
   6  19   3 528.979 272.636   1
  -6 -19  -3 368.976 184.959   3
   6 -19   3 429.166 224.753   3
   7  19   3 1311.43 305.199   1
   7 -19   3 1066.10 303.051   3
  -7 -19  -3 847.901 292.186   3
   8  19   3 275.551 251.735   1
  -8 -19  -3 328.894 209.390   3
   8 -19   3 174.697 204.600   3
   9  19   3 1739.64 488.460   1
   9 -19   3 881.221 324.317   3
  -9 -19  -3 500.382 201.185   3
  10  19   3 27.3620 158.137   1
   9 -20  -3-3.86229 115.375   3
   8 -20  -3-19.4057 112.137   3
   7 -20  -3 124.840 159.714   3
  -6 -20   3 124.585 139.345   3
   6 -20  -3 42.3545 134.145   3
  -6 -20   3 105.391 151.417   2
  -5  20   3 964.162 238.668   1
  -5 -20   3 940.227 253.164   3
  -5 -20   3 1207.23 272.491   2
   5 -20  -3 832.202 250.105   3
  -4 -20   3 161.008 142.060   2
  -4  20   3 345.051 232.119   1
  -4 -20   3 261.534 185.609   3
   4 -20  -3 209.360 158.452   3
  -3  20   3 248.824 230.268   1
  -3 -20   3 86.1751 115.557   3
  -3 -20   3 30.4686 157.104   2
   3 -20  -3 89.3041 138.017   3
   2 -20  -3 445.287 246.488   3
  -2  20   3 542.979 314.364   1
  -2 -20   3 136.804 175.445   3
  -2 -20   3 51.9377 166.371   2
  -1 -20   3 72.9196 118.999   3
   1 -20  -3 70.4680 112.744   3
  -1  20   3 60.2690 139.853   1
  -1 -20   3 33.5996 144.700   2
   0  20   3 495.595 291.361   1
   0 -20   3 90.7983 129.959   3
   0 -20  -3 217.202 160.688   3
   0 -20   3 105.325 174.548   2
   1 -20   3 257.838 194.113   2
  -1 -20  -3 91.4322 144.942   3
   1 -20   3 161.094 132.454   3
   1  20   3 267.933 244.434   1
  -2 -20  -3 62.6776 102.999   3
   2  20   3 99.0678 162.036   1
   2 -20   3 5.45045 102.570   3
   2 -20   3 43.0374 143.387   2
   3 -20   3 32.8592 159.745   3
   3 -20   3 58.9907 134.393   2
  -3 -20  -3 27.2439 109.018   3
   3  20   3 149.069 217.456   1
   4  20   3 102.481 156.111   1
   4 -20   3 151.242 163.576   3
   4 -20   3 268.308 253.511   2
  -4 -20  -3 129.879 138.583   3
   5  20   3 352.286 192.058   1
  -5 -20  -3 249.249 203.444   3
   5 -20   3 326.628 160.615   3
  -6 -20  -3 156.358 187.228   3
   6  20   3 261.282 229.121   1
   6 -20   3 92.2317 157.980   3
   7 -20   3 170.919 180.858   3
   7  20   3 447.932 256.186   1
  -7 -20  -3 144.244 190.982   3
   8  20   3 314.781 280.398   1
   8 -20   3 231.152 219.646   3
  -8 -20  -3 514.252 281.371   3
   8 -21  -3 125.722 211.593   3
   7 -21  -3 663.136 376.484   3
   6 -21  -3 1558.78 318.351   3
  -5  21   3 320.306 209.743   1
  -5 -21   3 253.589 141.552   3
   5 -21  -3 197.084 137.173   3
  -5 -21   3 190.878 197.413   2
  -4  21   3 1093.54 281.658   1
  -4 -21   3 687.465 283.065   2
  -4 -21   3 1018.10 351.210   3
   4 -21  -3 1459.96 354.999   3
   3 -21  -3 366.508 260.864   3
  -3  21   3 1330.64 354.000   1
  -3 -21   3 220.961 153.350   3
  -3 -21   3 235.641 187.629   2
  -2  21   3 270.850 195.136   1
  -2 -21   3 6.95038 132.787   2
  -2 -21   3 53.9122 110.445   3
   2 -21  -3 113.320 187.099   3
  -1  21   3 686.670 308.649   1
  -1 -21   3 157.522 190.663   2
   1 -21  -3 173.320 178.975   3
  -1 -21   3 142.607 174.752   3
   0 -21   3 495.860 207.875   3
   0 -21  -3 366.450 197.228   3
   0 -21   3 199.554 187.632   2
   0  21   3 506.557 300.078   1
   1  21   3 383.613 269.203   1
   1 -21   3 42.4856 134.815   3
  -1 -21  -3 158.907 197.856   3
   1 -21   3 118.486 161.238   2
   2  21   3 1059.70 407.471   1
   2 -21   3 386.081 254.002   3
  -2 -21  -3 983.287 280.128   3
   2 -21   3 827.734 289.501   2
   3  21   3 2957.91 429.843   1
  -3 -21  -3 2228.82 366.019   3
   3 -21   3 2273.53 358.683   2
   3 -21   3 2777.05 456.093   3
  -4 -21  -3 2341.86 350.054   3
   4  21   3 2574.51 478.332   1
   4 -21   3 1842.54 336.062   3
   4 -21   3 2261.90 394.961   2
   5  21   3 653.665 318.280   1
   5 -21   3 199.090 225.263   3
  -5 -21  -3 229.196 222.467   3
   6  21   3 262.981 194.402   1
   6 -21   3 10.5251 118.021   3
  -6 -21  -3 169.098 172.960   3
   7  21   3 361.066 320.063   1
   7 -21   3 53.5298 129.611   3
  -7 -21  -3 81.9191 185.446   3
   6 -22  -3 847.919 320.479   3
   5 -22  -3 2108.69 323.451   3
  -4  22   3 1627.70 359.715   1
  -4 -22   3 782.023 225.436   2
   4 -22  -3 1375.49 344.189   3
  -3  22   3 621.846 273.046   1
   3 -22  -3 105.567 255.117   3
  -3 -22   3 203.738 234.154   3
  -3 -22   3 502.149 284.489   2
  -2  22   3 280.610 243.838   1
   2 -22  -3 11.7912 83.7930   3
  -2 -22   3 145.461 188.456   2
  -2 -22   3 161.858 213.240   3
  -1  22   3 310.279 191.170   1
  -1 -22   3 40.1736 135.981   2
  -1 -22   3 117.662 146.301   3
   1 -22  -3 71.4411 145.217   3
   0 -22   3 272.307 239.320   3
   0  22   3 535.772 266.462   1
   0 -22  -3 39.3527 135.897   3
   0 -22   3 180.295 155.693   2
  -1 -22  -3 114.672 142.493   3
   1  22   3 817.624 320.656   1
   1 -22   3 95.6772 152.971   3
   1 -22   3 538.517 247.692   2
   2 -22   3 1831.78 343.149   3
   2  22   3 2676.03 478.691   1
   2 -22   3 1477.42 332.610   2
  -2 -22  -3 2051.57 359.749   3
   3 -22   3 231.539 185.760   3
   3  22   3 1393.57 397.486   1
   3 -22   3 500.867 360.309   2
  -3 -22  -3 309.358 226.637   3
   4  22   3 1530.89 336.785   1
   4 -22   3 723.993 221.595   3
  -4 -22  -3 1049.65 294.872   3
   5  22   3 842.151 274.187   1
   5 -22   3 182.123 185.731   3
  -5 -22  -3 251.394 237.077   3
   6 -22   3-32.9011 118.334   3
  -4  23   3 1682.93 357.019   1
  -4 -23   3 1116.47 357.769   2
  -3  23   3 1984.59 384.010   1
  -3 -23   3 653.024 265.645   2
   3 -23  -3 1262.43 350.276   3
  -2  23   3 410.284 246.438   1
   2 -23  -3 77.8022 169.284   3
  -2 -23   3 264.547 224.888   2
  -2 -23   3 113.196 143.496   3
  -1  23   3 325.716 265.232   1
  -1 -23   3 103.518 184.308   3
   1 -23  -3 74.5725 180.324   3
  -1 -23   3 150.513 173.742   2
   0  23   3 370.667 242.299   1
   0 -23  -3 165.482 219.483   3
   0 -23   3 282.367 237.590   3
   0 -23   3 62.3300 168.888   2
   1  23   3 1352.57 400.430   1
   1 -23   3 429.154 260.716   2
   1 -23   3 141.419 185.725   3
  -1 -23  -3 29.8579 157.255   3
   2  23   3 790.313 334.672   1
  -2 -23  -3 205.267 241.493   3
   2 -23   3 621.619 263.358   2
   2 -23   3 118.469 198.085   3
   3 -23   3 2059.49 396.616   3
   4 -23   3 613.280 242.193   3
  -3 -24   3 95.5863 190.057   2
  -2 -24   3 132.204 234.889   2
  -1 -24   3 115.825 193.763   3
  -1 -24   3 193.982 251.289   2
   0 -24   3 30.7329 125.599   3
   1 -24   3 198.981 177.755   3
   2 -24   3 270.800 188.822   3
 -18   0   4 460.149 224.605   2
  18   0  -4 348.087 198.118   0
 -17   0   4 3673.24 478.217   2
  17   0  -4 2863.43 393.455   0
 -16   0   4 199.343 177.663   2
  16   0  -4 266.599 155.598   0
 -15   0   4 250.782 112.619   2
  15   0  -4 140.261 123.853   0
 -14   0   4 149.724 105.623   2
  14   0  -4 190.147 229.915   0
  13   0  -4 5484.90 431.260   0
  12   0  -4 1271.56 235.758   0
  11   0  -4 3420.51 327.142   0
  10   0  -4 2634.04 331.911   0
  10   0  -4 1869.86 180.402   3
   9   0  -4 1239.72 254.080   0
   9   0  -4 1337.98 205.498   3
   8   0  -4 1548.04 196.478   3
   8   0  -4 932.326 212.217   0
   7   0  -4 22673.8 279.888   3
   7   0  -4 24198.3 405.717   0
   6   0  -4 10999.6 196.928   3
  -6   0   4 12169.9 169.338   1
   6   0  -4 12904.3 359.752   0
  -5   0   4 7766.19 152.652   1
   5   0  -4 10279.0 328.177   0
   5   0  -4 7887.97 152.247   3
  -4   0   4 28939.8 351.536   2
   4   0  -4 26603.2 181.321   3
  -4   0   4 26894.2 229.398   1
  -3   0   4 109921. 486.043   2
   3   0  -4 110306. 263.009   3
  -3   0   4 111193. 424.491   1
  -2   0   4 169.784 58.0354   2
   2   0  -4 209.157 42.6640   3
  -2   0   4 125.433 46.5283   1
  -1   0   4 227.422 86.1584   1
  -1   0   4 130.489 47.7519   2
   0   0   4 134961. 510.911   1
   0   0   4 133086. 380.271   2
   1   0   4 61716.8 391.506   0
   1   0   4 56515.0 369.904   1
   1   0   4 57109.3 254.961   2
   2   0   4 14396.1 159.693   2
   2   0   4 9493.94 206.079   0
   2   0   4 14130.1 236.724   1
   3   0   4 25949.9 336.757   0
   3   0   4 24297.7 200.967   2
   3   0   4 25450.0 319.848   1
   4   0   4 1850.38 159.663   1
   4   0   4 2081.64 184.544   0
   5   0   4 316.721 117.826   1
   5   0   4 810.671 176.695   0
   6   0   4 34369.6 376.442   1
   6   0   4 38694.4 533.604   0
   7   0   4 732.004 168.689   1
   7   0   4 897.310 234.468   0
   8   0   4 6010.43 245.575   1
   8   0   4 5004.87 271.049   0
   9   0   4 34.6184 64.0716   1
   9   0   4-86.7791 88.3719   0
  10   0   4 7099.16 416.985   0
  11   0   4 545.979 293.499   0
  12   0   4 1424.59 312.533   0
  13   0   4 713.112 197.510   0
  14   0   4 85.6618 141.873   0
  15   0   4 571.128 217.955   0
  16   0   4 55.1823 172.870   0
 -18  -1   4 668.420 271.996   2
 -18   1   4 975.567 308.397   2
  18   1  -4 600.045 304.069   0
  18  -1  -4 861.412 341.157   0
 -17  -1   4 287.762 167.519   2
 -17   1   4 334.251 252.112   2
  17   1  -4 90.4303 144.981   0
  17  -1  -4 479.503 285.122   0
 -16  -1   4 58.5769 131.857   2
 -16   1   4 83.2405 149.505   2
  16  -1  -4-66.0952 113.661   0
  16   1  -4 21.6807 124.412   0
 -15  -1   4 68.1877 112.529   2
  15   1  -4 14.1704 103.472   0
  15  -1  -4 27.0081 100.635   0
 -14  -1   4 2612.12 316.819   2
  14  -1  -4 2325.27 358.117   0
  14   1  -4 2114.87 328.879   0
  13  -1  -4 1048.59 292.443   0
 -13  -1   4 2109.23 336.786   2
  13   1  -4 1137.08 274.119   0
 -12  -1   4 12393.0 468.363   2
  12   1  -4 10453.2 505.038   0
  12  -1  -4 10895.1 525.848   0
  11  -1  -4 615.307 212.411   0
 -11  -1   4 1431.76 331.316   2
  11  -1  -4 407.594 149.558   3
  11   1  -4 647.479 254.239   0
  10   1  -4 15750.2 476.018   0
  10  -1  -4 16322.2 565.735   0
 -10  -1   4 18070.0 464.167   2
  10  -1  -4 17404.6 425.786   3
  -9  -1   4 17772.3 487.841   2
   9  -1  -4 16009.3 363.867   3
   9   1  -4 16505.4 495.334   0
   9  -1  -4 15854.9 474.446   0
  -8  -1   4 24770.4 420.229   2
   8  -1  -4 23997.7 336.292   3
   8  -1  -4 23145.8 442.372   0
   8   1  -4 24191.5 494.226   0
   7   1  -4 12865.2 383.706   0
   7  -1  -4 12672.0 358.964   0
  -7  -1   4 13019.9 310.761   2
   7  -1  -4 14186.1 284.147   3
   6   1  -4 8792.37 159.954   3
  -6  -1   4 16273.9 320.490   2
  -6   1   4 15478.4 160.638   1
   6  -1  -4 16145.0 247.292   3
   6   1  -4 17361.7 420.550   0
   6  -1  -4 16777.5 358.691   0
   5  -1  -4 22955.0 326.537   0
  -5  -1   4 22975.8 346.893   2
   5  -1  -4 22590.5 236.266   3
  -5  -1   4 23116.9 236.310   1
   5   1  -4 22231.4 195.943   3
   5   1  -4 23316.1 386.991   0
  -5   1   4 20019.8 181.212   1
  -4  -1   4 4905.12 201.458   2
  -4  -1   4 4867.18 140.795   1
   4   1  -4 4695.59 94.2120   3
  -4   1   4 4712.93 117.338   1
   4  -1  -4 5281.36 131.456   3
   3  -1  -4 32705.3 203.909   3
  -3  -1   4 31149.8 284.552   2
  -3   1   4 33009.5 250.429   1
  -3  -1   4 33698.1 301.911   1
  -2  -1   4 109446. 445.993   2
  -2   1   4 109364. 410.929   2
   2  -1  -4 113595. 306.442   3
  -2   1   4 110084. 418.423   1
  -2  -1   4 115803. 456.816   1
  -1  -1   4 18695.0 214.212   2
  -1   1   4 18233.2 193.372   2
  -1   1   4 20328.5 247.647   1
  -1  -1   4 19504.6 238.919   1
   0   1   4 73260.3 432.189   1
   0  -1   4 67290.0 321.527   2
   0   1   4 64058.9 257.544   2
   0  -1   4 66140.6 384.939   1
   1  -1   4 124820. 498.615   0
   1   1   4 127946. 515.635   0
   1  -1   4 29752.7 280.732   1
   1   1   4 126718. 516.195   1
   1  -1   4 126869. 418.980   2
   1   1   4 125587. 300.491   2
   2  -1   4 18583.9 289.079   0
   2  -1   4 17597.9 265.626   1
   2   1   4 4330.26 156.003   0
   2   1   4 17624.7 138.412   2
   2   1   4 17009.9 238.045   1
   2  -1   4 17885.4 217.591   2
   3   1   4 6112.21 164.129   1
   3  -1   4 6469.40 203.816   1
   3  -1   4 7086.68 211.588   0
   3   1   4 6947.57 255.732   0
   3  -1   4 6909.45 165.121   2
   4  -1   4 3369.02 156.342   1
   4  -1   4 3440.36 219.565   0
   4   1   4 3740.95 217.531   0
   4   1   4 3160.06 163.142   1
   5   1   4 24242.1 384.701   0
   5   1   4 24066.6 335.868   1
   5  -1   4 22351.1 308.884   1
   5  -1   4 24801.6 395.333   0
   6  -1   4 1933.34 169.183   1
   6  -1   4 3549.68 295.163   0
   6   1   4 2417.64 229.968   1
   6   1   4 2676.94 242.173   0
   7   1   4 9517.93 335.362   1
   7  -1   4 7360.67 215.021   1
   7  -1   4 8724.86 337.787   0
   7   1   4 10057.2 444.544   0
   8  -1   4 1696.93 142.472   1
   8   1   4 1596.12 193.351   1
   8   1   4 1466.84 171.398   0
   8  -1   4 1412.61 184.225   0
   9  -1   4 1005.22 157.285   1
   9  -1   4 986.935 159.075   0
   9   1   4 967.723 160.823   1
   9   1   4 865.033 164.548   0
  10   1   4 4155.92 309.035   0
  10  -1   4 4511.51 336.331   0
  11   1   4 18193.5 623.364   0
  11  -1   4 18021.8 631.174   0
  12  -1   4 5025.72 446.188   0
  12   1   4 4848.19 423.581   0
  13  -1   4 313.573 167.515   0
  13   1   4 92.5188 144.237   0
  14  -1   4 45.5113 163.499   0
  14   1   4 82.1032 138.368   0
  15  -1   4 215.503 257.575   0
  15   1   4 48.9587 154.868   0
  16   1   4 550.682 305.659   0
  16  -1   4 666.117 349.864   0
 -18   2   4 1092.21 270.513   2
  18  -2  -4 834.254 398.236   0
  18   2  -4 1097.84 331.967   0
 -17  -2   4 304.823 194.173   2
 -17   2   4 611.219 266.901   2
  17  -2  -4 535.794 242.941   0
  17   2  -4 391.563 212.332   0
 -16  -2   4 44.1359 106.896   2
  16  -2  -4-4.28240 121.083   0
  16   2  -4-67.6989 116.084   0
 -15  -2   4 660.505 169.951   2
  15   2  -4 318.882 160.765   0
  15  -2  -4 167.979 160.608   0
 -14  -2   4 784.976 243.949   2
  14  -2  -4 741.185 244.555   0
  14   2  -4 949.474 341.553   0
 -13  -2   4 5379.16 454.197   2
  13   2  -4 3831.73 333.371   0
  13  -2  -4 2161.68 297.564   3
  13  -2  -4 4279.79 384.783   0
 -12  -2   4 4355.00 348.945   2
  12  -2  -4 3240.94 374.090   0
  12   2  -4 2971.86 317.429   0
  12  -2  -4 5032.60 340.723   3
  11   2  -4 18600.6 546.724   0
  11  -2  -4 18357.6 508.994   0
 -11  -2   4 17826.4 470.456   2
  11  -2  -4 17819.7 478.059   3
  10   2  -4 1835.70 310.439   0
 -10  -2   4 1319.33 231.329   2
  10  -2  -4 1083.87 269.845   0
  10  -2  -4 373.724 127.943   3
   9  -2  -4 5560.54 311.911   0
  -9  -2   4 6089.83 367.702   2
   9   2  -4 5578.66 331.267   0
   9  -2  -4 5693.21 266.660   3
  -8  -2   4 5677.19 275.492   2
   8  -2  -4 5843.49 241.694   3
   8   2  -4 5609.18 276.741   0
   8  -2  -4 5901.88 284.537   0
   7  -2  -4 466.478 142.532   0
  -7  -2   4 597.140 199.371   2
   7  -2  -4 564.441 121.448   3
  -7   2   4 511.039 50.1687   1
   7   2  -4 252.187 92.1196   0
  -6   2   4 10703.5 133.854   1
   6  -2  -4 16320.3 255.127   3
   6   2  -4 16306.4 341.950   0
   6  -2  -4 16004.4 365.306   0
  -6  -2   4 15777.6 320.193   2
   5   2  -4 1357.84 152.533   0
  -5  -2   4 1383.72 159.154   2
  -5   2   4 1074.73 66.3234   1
   5  -2  -4 672.101 102.102   3
   5  -2  -4 2040.69 241.616   0
  -4  -2   4 3982.86 167.460   2
  -4   2   4 4273.14 119.792   1
   4  -2  -4 4450.89 136.623   3
  -4  -2   4 4414.77 173.529   1
  -3  -2   4 25068.6 290.518   1
  -3  -2   4 22690.4 248.073   2
   3  -2  -4 23205.6 195.882   3
  -3   2   4 23934.3 233.846   1
  -2  -2   4 97628.0 429.868   2
   2  -2  -4 101314. 340.697   3
  -2   2   4 100812. 412.544   1
  -2  -2   4 114374. 493.195   1
  -1  -2   4 33040.8 318.273   1
   1  -2  -4 29853.8 235.113   3
  -1   2   4 32301.8 290.693   1
  -1  -2   4 29985.1 288.020   2
  -1  -2   4 20373.8 115.293   3
   0   2   4 7982.39 109.178   2
   0  -2   4 8320.94 185.497   2
   0  -2   4 8641.97 182.711   1
   0  -2   4 8128.24 122.553   3
   0   2   4 8743.17 212.292   1
   1  -2   4 4741.24 196.644   1
   1  -2   4 4172.76 136.593   3
   1  -2   4 4365.92 178.788   0
   1   2   4 4322.71 164.807   1
   1  -2   4 4158.51 143.090   2
   1   2   4 4169.42 70.4304   2
   1   2   4 4663.74 174.505   0
   2   2   4 1425.53 133.651   0
   2  -2   4 1615.77 95.1355   2
   2  -2   4 1682.36 137.187   0
   2  -2   4 1681.15 147.503   1
   2   2   4 1512.20 126.607   1
   2  -2   4 1729.63 134.560   3
   3   2   4 504.102 108.616   1
   3  -2   4 557.241 93.9086   3
   3  -2   4 549.310 90.2856   1
   3  -2   4 582.267 151.551   0
   3   2   4 610.675 108.705   0
   3  -2   4 505.109 88.6751   2
   4  -2   4 102.761 66.8789   3
   4  -2   4 132.640 97.3684   2
   4   2   4 25.1788 59.8514   0
   4  -2   4 119.140 116.005   0
   4  -2   4 38.2578 54.3676   1
   4   2   4 80.4388 92.6767   1
   5   2   4 5432.23 232.523   1
   5  -2   4 5384.71 251.804   3
   5  -2   4 5262.32 201.727   1
   5  -2   4 5952.16 258.712   0
   5   2   4 5554.94 259.710   0
   6  -2   4 3511.82 215.315   3
   6  -2   4 6202.37 355.861   0
   6  -2   4 4865.15 208.589   1
   6   2   4 4636.07 221.270   1
   6   2   4 5127.13 254.593   0
   7  -2   4 15986.0 334.406   1
   7   2   4 16704.8 481.342   0
   7   2   4 14213.9 301.607   1
   7  -2   4 16901.0 494.460   0
   8  -2   4 6578.76 243.795   1
   8   2   4 6311.76 268.043   1
   8  -2   4 6518.48 318.757   0
   8   2   4 7192.07 389.698   0
   9   2   4 1743.88 204.157   1
   9   2   4 1490.30 187.300   0
   9  -2   4 920.302 132.846   0
  10   2   4 2490.89 308.512   0
  10  -2   4 2368.45 252.466   0
  11  -2   4 6104.68 460.180   0
  11   2   4 5227.47 438.937   0
  12  -2   4 768.423 249.514   0
  12   2   4 359.201 207.347   0
  13   2   4 965.893 246.113   0
  13  -2   4 1428.19 304.582   0
  14  -2   4 109.006 202.091   0
  14   2   4 15.1470 106.678   0
  15   2   4 161.718 148.681   0
  15  -2   4 379.651 253.935   0
  16  -2   4 314.440 196.759   0
  16   2   4 537.115 263.656   0
  18  -3  -4 155.674 176.135   0
 -17  -3   4 1070.25 315.337   2
  17   3  -4 1222.12 349.545   0
  17  -3  -4 999.251 268.339   0
 -16  -3   4 115.051 156.466   2
  16  -3  -4 76.0934 148.865   0
  16   3  -4-3.72664 113.676   0
  15  -3  -4 21.3080 116.735   0
 -15  -3   4 42.0261 136.754   2
  15   3  -4 18.8448 121.650   0
  14  -3  -4 2056.67 233.369   3
 -14  -3   4 3076.62 333.918   2
  14   3  -4 2403.59 294.189   0
  14  -3  -4 2631.99 315.272   0
  13  -3  -4 10067.4 544.260   0
 -13  -3   4 10447.7 539.967   2
  13  -3  -4 10467.4 429.199   3
  13   3  -4 10202.8 526.411   0
 -12  -3   4 605.842 223.364   2
  12   3  -4 192.261 104.929   0
  12  -3  -4 698.395 221.444   3
  12  -3  -4 552.805 189.666   0
  11  -3  -4 4266.07 425.588   0
  11  -3  -4 2512.49 285.406   3
 -11  -3   4 2690.74 366.125   2
  11   3  -4 4074.79 431.076   0
 -10  -3   4 23821.4 513.273   2
  10   3  -4 24791.2 550.998   0
  10  -3  -4 27822.8 624.463   0
  10  -3  -4 25291.5 461.788   3
  -9  -3   4 456.574 173.931   2
   9   3  -4 851.888 263.903   0
   9  -3  -4 437.130 248.199   0
   9  -3  -4 231.476 126.218   3
  -8  -3   4 2685.98 219.280   2
   8   3  -4 2542.21 223.484   0
   8  -3  -4 2836.23 209.027   3
   8  -3  -4 2698.73 269.595   0
   7  -3  -4 1530.68 198.785   0
   7  -3  -4 1614.97 145.685   3
  -7  -3   4 1555.16 170.329   2
  -7   3   4 1572.67 55.1146   1
   7   3  -4 1564.84 202.862   0
  -6  -3   4 63.0718 60.0699   2
  -6   3   4 72.9469 51.0543   1
   6   3  -4 433.883 177.247   0
   6  -3  -4 168.577 86.2421   3
   6  -3  -4 189.679 111.070   0
  -5   3   4 20439.4 195.803   1
  -5  -3   4 19197.9 298.982   2
   5  -3  -4 20174.8 335.477   0
   5   3  -4 20655.5 327.382   0
   5  -3  -4 20573.7 272.069   3
  -4  -3   4 7037.74 215.157   2
   4  -3  -4 7505.62 165.061   3
  -4   3   4 7032.82 124.245   1
  -4  -3   4 8199.87 222.452   1
  -3  -3   4 2001.50 154.269   2
  -3  -3   4 1563.07 51.2432   3
  -3   3   4 1747.05 108.224   1
   3  -3  -4 1704.01 119.193   3
  -3  -3   4 1908.17 182.027   1
   2  -3  -4 19267.8 195.945   3
  -2   3   4 20560.4 268.987   1
  -2  -3   4 21396.9 329.793   1
  -2  -3   4 19991.6 277.985   2
   1  -3  -4 167247. 502.430   3
  -1  -3   4 173880. 342.666   3
  -1  -3   4 164037. 545.934   2
  -1   3   4 190698. 626.649   1
  -1  -3   4 189170. 644.065   1
   0  -3   4 44183.3 246.699   3
   0  -3   4 45279.1 363.562   1
   0   3   4 47231.8 360.173   1
   0  -3   4 41397.9 319.002   2
   1  -3   4 5648.19 202.574   1
   1   3   4 4801.03 56.5050   2
   1  -3   4 5413.37 197.036   0
   1   3   4 5891.97 172.351   0
   1  -3   4 5424.71 186.750   2
   1   3   4 5867.07 222.962   1
   1  -3   4 5415.72 150.679   3
   2  -3   4 9166.07 181.453   2
   2  -3   4 9447.72 200.475   3
   2  -3   4 9440.44 192.383   0
   2   3   4 10051.7 219.706   0
   2  -3   4 8679.08 188.454   1
   2   3   4 10954.8 285.547   1
   3  -3   4 20238.8 324.149   0
   3  -3   4 18806.9 285.334   3
   3  -3   4 19077.9 262.592   1
   3  -3   4 19774.3 278.577   2
   3   3   4 21205.2 345.815   0
   3   3   4 19903.3 301.160   1
   4  -3   4 6374.85 196.015   1
   4  -3   4 6931.45 277.530   0
   4  -3   4 6524.75 240.328   3
   4   3   4 6601.89 277.698   0
   4  -3   4 6710.40 229.198   2
   4   3   4 7039.95 263.106   1
   5   3   4 1333.81 158.545   0
   5  -3   4 1274.18 169.577   1
   5  -3   4 1690.14 225.240   3
   5  -3   4 1169.89 186.733   0
   5   3   4 1363.70 187.281   1
   6   3   4 13899.0 418.853   0
   6  -3   4 11354.0 346.096   3
   6   3   4 13108.1 361.841   1
   6  -3   4 13133.6 364.317   0
   6  -3   4 11530.3 263.962   1
   7  -3   4 62.6366 73.1504   1
   7   3   4 39.1369 66.4833   1
   7  -3   4 140.406 148.788   3
   7   3   4 548.065 235.956   0
   7  -3   4 675.092 221.185   0
   8  -3   4 8355.79 424.366   3
   8  -3   4 17900.0 479.962   0
   8  -3   4 13586.6 265.464   1
   8   3   4 16213.6 397.113   1
   8   3   4 18472.0 468.136   0
   9   3   4 7093.05 314.535   1
   9   3   4 7881.27 403.517   0
   9  -3   4 6899.55 379.927   0
  10   3   4 92.4909 103.288   0
  10  -3   4 100.384 112.826   0
  10   3   4 119.593 103.770   1
  11  -3   4 2896.20 352.133   0
  11   3   4 2058.76 321.914   0
  12   3   4 9007.68 480.443   0
  12  -3   4 10283.6 482.817   0
  13  -3   4 21.9257 111.252   0
  13   3   4 96.5612 145.336   0
  14  -3   4 92.6924 128.997   0
  14   3   4 104.441 170.471   0
  15   3   4 3101.25 391.352   0
  15  -3   4 2761.64 404.353   0
  16   3   4 1023.81 277.816   0
  16  -3   4 653.800 269.837   0
  17   4  -4 210.966 155.389   0
  17  -4  -4 529.284 312.146   0
 -16  -4   4 1313.58 336.863   2
  16  -4  -4 751.643 201.506   0
  16   4  -4 693.379 179.120   0
 -15  -4   4 1339.97 328.116   2
  15  -4  -4 470.857 146.684   3
  15  -4  -4 504.798 202.245   0
  15   4  -4 513.196 172.068   0
 -14  -4   4 2709.76 311.705   2
  14   4  -4 3401.89 362.690   0
  14  -4  -4 3030.56 353.719   0
  14  -4  -4 3520.46 391.370   3
 -13  -4   4 89.1696 97.5595   2
  13   4  -4 202.600 193.248   0
  13  -4  -4 200.109 199.724   3
  13  -4  -4 112.059 166.162   0
 -12  -4   4 89.1142 113.034   2
  12  -4  -4 145.087 129.004   3
  12   4  -4 124.775 169.083   0
  12  -4  -4 336.295 234.736   0
 -11  -4   4 6483.50 375.165   2
  11  -4  -4 7140.57 387.956   3
  11   4  -4 6862.07 418.548   0
  11  -4  -4 6847.43 450.792   0
 -10  -4   4 67.8957 86.5777   2
  10   4  -4 97.8458 183.525   0
  10  -4  -4 317.053 210.203   0
  10  -4  -4 315.497 164.980   3
  -9  -4   4 24796.5 462.238   2
   9   4  -4 26667.1 539.940   0
   9  -4  -4 25661.5 471.953   0
   9  -4  -4 26466.1 485.291   3
  -8  -4   4 69.9552 124.301   2
   8  -4  -4 56.4419 79.0381   0
   8  -4  -4 138.779 101.678   3
   8   4  -4 47.6859 81.9240   0
   7  -4  -4 2747.63 204.267   0
  -7  -4   4 3361.97 223.435   2
   7   4  -4 2687.66 171.685   0
   7  -4  -4 3512.76 187.345   3
  -7   4   4 2574.74 67.0475   1
  -6  -4   4 14249.3 314.214   2
   6  -4  -4 14663.1 246.135   3
  -6   4   4 15799.7 173.613   1
   6  -4  -4 15057.8 346.353   0
   6   4  -4 15529.4 329.112   0
  -5  -4   4 30296.7 375.274   2
   5  -4  -4 29396.9 326.962   3
  -5   4   4 29064.1 238.630   1
   5  -4  -4 29779.0 366.886   0
   5   4  -4 31188.3 398.226   0
  -4  -4   4 2723.29 187.591   2
   4  -4  -4 2527.54 137.862   3
  -4   4   4 2873.79 154.846   1
  -3  -4   4 7330.55 101.887   3
   3  -4  -4 7455.51 176.574   3
  -3  -4   4 9190.23 255.777   1
  -3   4   4 8388.02 217.142   1
  -3  -4   4 7785.55 233.678   2
   2  -4  -4 9320.53 196.160   3
  -2  -4   4 9885.30 247.486   1
  -2  -4   4 9160.39 109.263   3
  -2   4   4 10494.2 239.005   1
  -2  -4   4 9007.93 190.913   2
  -1  -4   4 4776.95 118.510   3
  -1  -4   4 4896.11 188.822   1
   1  -4  -4 4517.69 150.707   3
  -1   4   4 6108.80 235.758   1
  -1  -4   4 4656.42 185.731   2
   0  -4   4 1633.63 141.999   1
   0  -4   4 1677.91 84.0080   3
   0  -4   4 1602.65 131.871   2
   0   4   4 2112.76 172.972   1
   1  -4   4 217.941 58.8562   2
   1   4   4 377.947 96.1108   0
   1  -4   4 367.593 95.0516   3
   1  -4   4 271.557 74.9356   1
   1  -4   4 300.179 87.2085   0
   1   4   4 785.503 161.264   1
   2  -4   4 10853.4 204.450   3
   2  -4   4 12162.1 265.193   1
   2  -4   4 11329.3 227.832   0
   2  -4   4 11563.4 251.916   2
   2   4   4 11938.9 232.314   0
   2   4   4 13604.6 336.216   1
   3  -4   4 7113.57 248.671   1
   3  -4   4 6822.86 230.349   0
   3  -4   4 6763.26 224.195   2
   3   4   4 7247.57 240.994   0
   3  -4   4 6670.44 246.413   3
   3   4   4 7434.86 236.054   1
   4  -4   4 19396.0 356.201   3
   4  -4   4 18715.0 307.506   1
   4  -4   4 18323.4 322.514   2
   4  -4   4 18386.4 316.094   0
   4   4   4 19128.2 343.245   0
   4   4   4 19563.3 351.204   1
  -5  -4  -4 2342.28 47.0367   2
   5  -4   4 2862.62 186.563   1
   5  -4   4 2639.95 190.329   2
   5  -4   4 2870.46 207.290   0
   5   4   4 2709.27 156.697   0
   5  -4   4 2999.65 216.260   3
   5   4   4 3330.36 245.046   1
  -6  -4  -4 17637.7 148.218   2
   6  -4   4 20836.6 421.181   3
   6  -4   4 20330.0 397.997   0
   6   4   4 20562.9 452.673   0
   6   4   4 21866.6 415.193   1
   6  -4   4 20858.0 334.904   1
   7  -4   4 18964.3 484.831   3
   7  -4   4 19079.2 340.858   1
   7  -4   4 19618.1 473.537   0
   7   4   4 18849.6 435.392   0
   7   4   4 17721.7 356.636   1
   8  -4   4 8293.02 398.227   3
   8  -4   4 7213.71 265.520   1
   8   4   4 10153.4 451.796   0
   8   4   4 7444.84 300.601   1
   8  -4   4 9228.08 375.366   0
   9  -4   4 67.9437 94.4924   0
   9  -4   4 172.977 156.263   3
   9   4   4 18.4898 64.3186   1
   9   4   4 86.5912 97.4008   0
  10  -4   4 108.091 194.925   3
  10   4   4 2.16092 132.392   0
  10   4   4 15.2737 65.8069   1
  10  -4   4 33.2545 111.248   0
  11  -4   4 3369.08 362.282   0
  11   4   4 3077.05 328.654   0
  12   4   4 363.085 208.824   0
  12  -4   4 248.177 156.328   0
  13  -4   4 113.002 162.698   0
  13   4   4 75.2532 117.564   0
  14   4   4 148.828 166.937   0
  14  -4   4 79.2615 141.245   0
  15  -4   4 587.723 266.097   0
  15   4   4 776.641 322.524   0
  16  -4   4 3561.37 424.001   0
  18  -5  -4 219.088 236.373   0
  17  -5  -4 2358.93 416.454   0
  17   5  -4 2813.14 458.573   0
  16  -5  -4 12.3080 159.291   3
  16   5  -4 166.697 183.574   0
  16  -5  -4 84.5056 164.636   0
 -16  -5   4 182.283 183.702   2
 -15  -5   4 1221.18 247.253   2
  15  -5  -4 428.840 131.418   0
  15  -5  -4 922.451 254.726   3
  15   5  -4 603.838 191.387   0
 -14  -5   4 716.503 224.909   2
  14  -5  -4 285.806 183.635   0
  14   5  -4 260.458 182.202   0
  14  -5  -4 290.079 208.189   3
 -13  -5   4 782.287 200.590   2
  13  -5  -4 1111.02 261.820   0
  13  -5  -4 1349.77 324.286   3
  13   5  -4 1263.61 259.177   0
  12   5  -4 2380.94 316.464   0
  12  -5  -4 2743.94 361.397   3
 -12  -5   4 1977.32 222.310   2
  12  -5  -4 2440.74 303.681   0
 -11  -5   4 1014.49 245.820   2
  11  -5  -4 881.387 217.687   3
  11   5  -4 1178.15 275.123   0
  11  -5  -4 1497.28 305.474   0
  10   5  -4 8864.58 443.082   0
 -10  -5   4 6822.66 328.927   2
  10  -5  -4 9627.47 443.720   0
  10  -5  -4 9000.87 410.153   3
  -9  -5   4-3.28363 80.0722   2
   9   5  -4 367.599 193.311   0
   9  -5  -4 228.932 173.435   0
   9  -5  -4 5.82437 58.9477   3
   8  -5  -4 15141.2 321.066   0
   8  -5  -4 17695.0 392.794   3
  -8  -5   4 17592.2 366.788   2
   8   5  -4 15407.5 341.935   0
   7  -5  -4 1124.21 134.751   3
   7  -5  -4 1893.06 154.775   0
  -7  -5   4 1742.22 160.981   2
  -7   5   4 2363.59 95.1509   1
   7   5  -4 1913.11 192.815   0
   6  -5  -4 12422.9 284.945   3
   6  -5  -4 12056.0 301.650   0
  -6  -5   4 12541.6 300.547   2
  -6   5   4 12212.0 172.878   1
   6   5  -4 11929.7 319.349   0
  -5  -5   4 480.876 132.937   2
   5  -5  -4 553.782 120.258   0
   5  -5  -4 581.522 124.829   3
   5   5  -4 910.732 215.865   0
  -5   5   4 753.780 120.533   1
  -4  -5   4 226.778 85.4513   2
   4  -5  -4 386.425 89.9190   3
  -4   5   4 939.032 117.473   1
  -3  -5   4 1911.37 87.7454   3
   3  -5  -4 1802.26 149.656   3
  -3  -5   4 2108.19 192.806   2
  -3   5   4 2014.21 130.137   1
  -2  -5   4 51.1680 33.5972   3
  -2   5   4 25.6428 47.6643   1
  -2  -5   4 82.3048 63.4893   2
   2  -5  -4 108.209 84.0290   3
  -1  -5   4 12489.1 269.073   1
  -1   5   4 11613.5 220.807   1
  -1  -5   4 12098.3 264.378   2
  -1  -5   4 11451.9 155.781   3
   1  -5  -4 12261.1 238.690   3
   0  -5   4 4594.59 211.289   1
   0  -5   4 4391.73 126.707   3
   0  -5  -4 4309.15 138.707   3
   0  -5   4 4416.20 186.261   2
   0   5   4 4333.21 155.745   1
   1   5   4 16725.3 233.225   0
   1  -5   4 16758.0 237.624   0
   1  -5   4 17218.9 314.914   1
   1  -5   4 15316.4 237.052   2
   1  -5   4 17096.2 236.568   3
   1   5   4 16166.2 270.350   1
   2  -5   4 5377.70 211.767   1
   2   5   4 4832.95 152.154   0
   2  -5   4 4966.73 167.110   3
   2  -5   4 5255.08 226.005   2
   2  -5   4 5337.74 199.881   0
   2   5   4 4674.76 187.669   1
   3  -5   4 21912.3 301.494   1
   3   5   4 22914.6 313.700   0
   3  -5   4 22350.8 328.735   3
   3  -5   4 21923.3 296.188   0
   3  -5   4 22234.5 345.759   2
   3   5   4 19882.2 291.484   1
   4  -5   4 620.005 166.490   3
   4  -5   4 299.410 107.322   2
   4  -5   4 489.028 129.160   0
   4   5   4 464.462 144.190   0
   4  -5   4 480.335 126.339   1
   4   5   4 546.488 189.230   1
   5  -5   4 5926.81 265.033   3
   5  -5   4 6191.17 227.361   1
   5  -5   4 5609.38 235.917   2
   5  -5   4 6100.90 260.022   0
   5   5   4 5832.20 227.973   0
   5   5   4 7265.02 339.195   1
   6  -5   4 490.115 166.786   3
   6  -5   4 384.337 159.113   0
   6  -5   4 579.902 166.100   1
   6   5   4 522.675 147.604   0
   6   5   4 623.432 157.090   1
   7  -5   4 897.261 214.504   0
   7  -5   4 891.954 105.812   1
   7  -5   4 942.787 163.898   3
   7   5   4 850.635 195.782   0
   7   5   4 1262.04 239.529   1
   8  -5   4 6684.47 390.668   0
   8  -5   4 5405.30 239.363   1
   8  -5   4 5750.85 353.188   3
   8   5   4 6150.70 331.278   0
   8   5   4 5325.20 305.714   1
   9  -5   4 2640.90 294.947   0
   9  -5   4 2398.26 324.117   3
   9   5   4 2099.77 212.984   1
   9   5   4 2433.17 247.212   0
  10   5   4 724.874 225.092   0
  10   5   4 666.769 154.476   1
  10  -5   4 1342.61 314.213   3
  10  -5   4 1130.03 238.171   0
  11  -5   4-70.2452 94.0608   3
  11  -5   4 40.8793 115.200   0
  11   5   4 79.6042 131.312   0
  12  -5   4 1056.07 258.095   0
  12   5   4 1190.09 304.581   0
  13  -5   4 224.656 145.728   0
  13   5   4 248.804 153.224   0
  14   5   4 866.122 242.469   0
  14  -5   4 911.223 276.382   0
  15  -5   4 3059.72 365.294   0
  15   5   4 2959.65 410.771   0
  16  -5   4 201.548 243.997   0
  17  -6  -4 617.576 263.355   3
  17  -6  -4 501.445 249.486   0
  17   6  -4 238.476 176.733   0
  16  -6  -4 1499.01 321.812   3
  16  -6  -4 2019.73 307.423   0
  16   6  -4 2209.27 390.907   0
 -15  -6   4 1162.73 223.363   2
  15  -6  -4 966.951 242.865   3
  15   6  -4 756.515 230.659   0
  15  -6  -4 352.926 206.375   0
 -14  -6   4 5648.75 357.626   2
  14  -6  -4 5946.25 395.720   3
  14  -6  -4 5054.33 379.560   0
  14   6  -4 5261.43 474.122   0
  13   6  -4 4695.39 384.179   0
  13  -6  -4 4480.13 380.475   0
  13  -6  -4 5010.23 382.376   3
 -13  -6   4 4322.30 333.386   2
 -12  -6   4 468.867 111.965   2
  12  -6  -4 924.493 176.428   3
  12   6  -4 559.297 109.317   0
  12  -6  -4 932.693 231.872   0
 -11  -6   4 303.054 109.400   2
  11  -6  -4 561.152 191.840   3
  11   6  -4 595.006 229.823   0
  11  -6  -4 524.926 198.515   0
  10   6  -4 2090.55 346.727   0
  10  -6  -4 1317.85 226.019   0
 -10  -6   4 811.563 121.365   2
  10  -6  -4 1041.80 189.546   3
  -9  -6   4 1727.53 237.081   2
   9   6  -4 2984.84 330.608   0
   9  -6  -4 1952.92 196.568   3
   9  -6  -4 2682.94 283.796   0
  -8  -6   4 429.040 134.395   2
   8  -6  -4 383.224 157.771   3
   8   6  -4 703.197 198.208   0
   8  -6  -4 582.400 190.548   0
   7  -6  -4 35943.9 437.274   3
  -7  -6   4 35040.5 470.416   2
   7   6  -4 34611.0 428.652   0
   7  -6  -4 33518.5 417.980   0
  -7   6   4 35785.3 268.788   1
  -6  -6   4 484.911 193.778   2
   6   6  -4 61.3878 61.8333   0
   6  -6  -4 66.9304 72.4759   3
   6  -6  -4 178.378 135.718   0
  -6   6   4 245.947 98.0839   1
   5  -6  -4 11175.2 293.322   3
   5   6  -4 11631.3 316.840   0
   5  -6  -4 11262.7 277.466   0
  -5   6   4 11040.4 204.366   1
  -5  -6   4 10012.4 261.124   2
  -4  -6   4 29693.6 238.581   3
  -4  -6   4 31423.3 382.468   2
   4  -6  -4 30267.2 352.950   3
  -4   6   4 28581.7 287.725   1
  -3   6   4 73640.5 454.431   1
  -3  -6   4 75083.4 340.253   3
   3  -6  -4 75269.7 457.701   3
  -3  -6   4 78014.6 553.651   2
  -2   6   4 918.745 170.467   1
   2  -6  -4 708.680 99.4391   3
  -2  -6   4 844.492 99.6842   3
  -2  -6   4 1169.92 166.539   2
  -1  -6   4 23862.4 221.773   3
  -1   6   4 25126.2 359.991   1
  -1  -6   4 24211.0 332.750   2
   1  -6  -4 25056.8 317.297   3
   0   6   4 1305.73 167.805   1
   0  -6  -4 1209.61 156.653   3
   0  -6   4 1615.11 206.995   1
   0  -6   4 1265.43 167.310   2
   0  -6   4 1286.35 130.157   3
   1   6   4 15414.0 301.385   1
   1  -6   4 15565.6 249.590   3
   1  -6   4 13965.6 261.374   2
   1   6   4 15565.6 236.548   0
   1  -6   4 15619.2 303.123   1
   2   6   4 1468.80 146.333   1
   2  -6   4 1517.64 173.486   2
   2  -6   4 1644.86 156.114   3
   2  -6   4 1699.71 203.679   1
   2   6   4 1668.60 146.372   0
   2  -6   4 1626.57 138.986   0
   3  -6   4 7628.88 217.659   3
   3  -6   4 8345.01 291.241   2
   3   6   4 8817.04 267.600   0
   3  -6   4 8316.50 258.150   1
   3  -6   4 8036.77 201.964   0
   3   6   4 7778.48 248.135   1
   4  -6   4 1103.68 174.122   3
   4   6   4 1432.62 164.887   0
   4  -6   4 1190.03 172.659   2
   4  -6   4 1248.96 172.540   0
   4  -6   4 1346.26 170.280   1
   4   6   4 1046.58 118.272   1
   5  -6   4 9694.83 279.797   2
   5  -6   4 9742.55 291.152   3
   5  -6   4 10785.1 296.599   1
   5   6   4 10679.6 338.468   0
   5  -6   4 10289.7 286.479   0
   5   6   4 8929.51 288.361   1
   6  -6   4 9539.50 294.412   1
   6  -6   4 8579.17 300.718   3
   6   6   4 8565.55 334.350   0
   6  -6   4 8856.18 317.614   0
   6   6   4 9174.92 330.835   1
   7  -6   4 12774.0 317.463   1
   7  -6   4 13366.6 400.585   0
   7   6   4 13963.3 481.309   0
   7  -6   4 11898.9 389.664   3
   7   6   4 14313.7 405.322   1
   8  -6   4 120.179 64.8864   1
   8  -6   4 154.241 99.4513   3
   8  -6   4 200.494 172.383   0
   8   6   4 561.859 195.398   0
   8   6   4 532.242 186.624   1
   9  -6   4 4972.08 403.897   3
   9  -6   4 4851.49 363.069   0
   9   6   4 4511.56 387.900   0
   9   6   4 4436.18 267.762   1
  10  -6   4 2589.88 300.697   3
  10  -6   4 1849.43 211.168   0
  10   6   4 2148.03 276.926   0
  10   6   4 2134.52 248.979   1
  11  -6   4 293.359 196.051   3
  11  -6   4 57.1081 100.966   0
  11   6   4 71.2597 140.349   0
  12  -6   4-80.4579 83.4371   3
  12  -6   4 11.7123 108.521   0
  12   6   4 130.351 140.868   0
  13   6   4-29.4292 126.834   0
  13  -6   4-14.5834 96.8355   0
  14   6   4 50.2294 167.595   0
  14  -6   4-2.95969 103.101   0
  15   6   4 1603.28 382.529   0
  15  -6   4 1277.59 325.601   0
  16  -6   4 1544.05 284.716   0
  17  -7  -4 653.887 238.762   0
  17   7  -4 947.492 284.525   0
  17  -7  -4 862.381 319.772   3
  16   7  -4 1227.51 256.018   0
  16  -7  -4 2425.51 451.386   3
  16  -7  -4 2308.17 348.791   0
 -15  -7   4 3181.59 339.896   2
  15  -7  -4 1789.53 283.347   0
  15   7  -4 2173.99 356.044   0
  15  -7  -4 2976.28 383.228   3
 -14  -7   4 52.0763 104.944   2
  14   7  -4 80.8879 163.510   0
  14  -7  -4 6.38701 91.6613   0
  14  -7  -4 76.5267 127.498   3
 -13  -7   4 2728.40 320.746   2
  13   7  -4 2575.46 298.959   0
  13  -7  -4 3150.20 342.928   0
  13  -7  -4 2668.24 335.067   3
 -12  -7   4 243.744 104.884   2
  12  -7  -4 361.879 166.900   3
  12   7  -4 747.303 283.835   0
  12  -7  -4 377.900 157.016   0
  11  -7  -4 3001.59 313.894   3
 -11  -7   4 2447.81 212.279   2
  11  -7  -4 3309.38 324.060   0
  11   7  -4 2822.61 293.026   0
  10  -7  -4 896.680 228.868   0
  10  -7  -4 766.705 210.689   3
 -10  -7   4 1096.33 263.858   2
  10   7  -4 903.527 249.623   0
   9   7  -4 59.4580 121.813   0
  -9  -7   4 93.7310 128.777   2
   9  -7  -4 301.122 182.538   0
   9  -7  -4 56.4323 83.5729   3
   8   7  -4 12547.9 411.559   0
   8  -7  -4 8217.65 281.688   3
  -8  -7   4 11411.0 416.375   2
   8  -7  -4 12733.2 402.905   0
  -7  -7   4 1891.78 239.014   2
  -7   7   4 1574.20 118.619   1
   7  -7  -4 1246.59 176.548   3
   7   7  -4 1195.68 117.139   0
   7  -7  -4 1090.22 101.893   0
   6   7  -4 75976.4 593.273   0
   6  -7  -4 71361.6 550.828   3
   6  -7  -4 71581.6 532.861   0
  -6  -7   4 75360.7 632.808   2
  -6   7   4 73405.2 444.586   1
   5  -7  -4 12006.0 299.255   0
  -5  -7   4 12360.0 212.877   3
   5  -7  -4 12250.9 324.235   3
   5   7  -4 12714.0 322.517   0
  -5  -7   4 11631.3 284.105   2
  -5   7   4 11552.9 234.160   1
  -4   7   4 5417.45 215.684   1
   4  -7  -4 5663.32 257.750   3
  -4  -7   4 5419.63 182.263   3
   4   7  -4 5428.95 219.811   0
  -4  -7   4 4723.46 210.007   2
  -3   7   4 2032.21 164.726   1
   3  -7  -4 2285.18 184.388   3
  -3  -7   4 1992.36 137.552   3
  -3  -7   4 1917.08 151.741   2
  -2   7   4 1434.76 160.329   1
   2  -7  -4 1482.85 141.265   3
  -2  -7   4 1444.48 108.775   3
  -2  -7   4 1661.77 183.351   2
  -1   7   4 4392.35 225.219   1
  -1  -7   4 4113.08 147.451   3
   1  -7  -4 4561.74 227.702   3
  -1  -7   4 4054.78 184.781   2
   0   7   4 105.881 85.9782   1
   0  -7   4 125.847 74.3322   3
   0  -7  -4 303.737 120.169   3
   0  -7   4 211.980 122.191   2
   1   7   4 4088.61 217.254   1
   1  -7   4 4370.60 237.194   2
   1   7   4 4371.74 158.763   0
   1  -7   4 4381.21 190.936   3
  -1  -7  -4 4848.30 240.947   3
   2   7   4 15057.1 348.429   1
   2   7   4 15864.5 283.325   0
   2  -7   4 14726.6 253.694   0
   2  -7   4 14650.0 292.554   1
   2  -7   4 3740.15 159.059   3
   2  -7   4 14301.7 329.592   2
   3   7   4 8118.59 327.216   1
   3  -7   4 7710.48 252.601   1
   3  -7   4 7901.91 238.095   3
   3   7   4 8038.49 227.428   0
   3  -7   4 8062.87 226.905   0
   3  -7   4 8605.81 316.312   2
   4  -7   4 38003.9 464.015   1
   4  -7   4 37600.4 416.478   0
   4   7   4 36071.6 401.963   0
   4  -7   4 37727.9 529.224   2
   4  -7   4 34420.6 432.191   3
   4   7   4 33664.0 490.317   1
   5  -7   4 2276.15 250.634   3
   5  -7   4 2011.82 231.127   2
   5  -7   4 1895.37 221.274   0
   5   7   4 1789.95 167.203   0
   5  -7   4 2487.74 243.814   1
   5   7   4 1964.45 213.966   1
   6  -7   4 2681.01 265.292   1
   6  -7   4 2253.25 253.426   3
   6   7   4 1887.94 220.722   0
   6   7   4 1750.50 176.713   1
   6  -7   4 1884.84 176.426   0
   7  -7   4 201.668 123.766   1
   7  -7   4 64.9365 86.3657   0
   7   7   4 143.090 134.215   0
   7   7   4 886.951 228.239   1
   7  -7   4 93.0002 102.529   3
   8  -7   4 6408.77 341.730   0
   8   7   4 7004.59 400.079   0
   8  -7   4 5248.30 345.348   3
   8   7   4 7643.28 386.841   1
   9  -7   4 985.281 209.933   3
   9   7   4 799.261 174.655   0
   9  -7   4 804.310 226.748   0
   9   7   4 1408.83 265.721   1
  10  -7   4 32.6129 89.8920   3
  10  -7   4-8.63632 76.8662   0
  10   7   4 17.7053 71.8320   1
  10   7   4 91.8439 144.795   0
  11   7   4 98.1045 201.158   0
  11  -7   4 99.4899 149.742   0
  11  -7   4 177.260 136.175   3
  12   7   4 1071.64 258.467   0
  12  -7   4 981.960 211.963   3
  12  -7   4 826.934 202.256   0
  13  -7   4 16.7544 110.308   3
  13  -7   4 176.475 141.475   0
  13   7   4 566.404 198.311   0
  14   7   4 2295.58 400.427   0
  14  -7   4 2099.90 392.343   0
  15  -7   4 1349.82 286.482   0
  15   7   4 1857.55 425.306   0
  17  -8  -4 85.4472 176.162   0
  17  -8  -4 113.019 152.321   3
  17   8  -4 176.003 195.458   0
  16  -8  -4 651.210 253.755   3
  16  -8  -4 518.259 227.139   0
  16   8  -4 957.038 323.643   0
  15   8  -4 900.939 272.539   0
  15  -8  -4 1093.86 284.728   3
  15  -8  -4 1635.02 356.456   0
  14  -8  -4 1219.95 263.958   0
  14   8  -4 1932.80 367.384   0
 -14  -8   4 1028.16 273.402   2
  14  -8  -4 1418.97 316.980   3
 -13  -8   4 56.1924 119.736   2
  13   8  -4 140.012 171.036   0
  13  -8  -4 78.0226 141.760   0
  13  -8  -4-4.40707 92.7641   3
 -12  -8   4 89.8235 125.454   2
  12  -8  -4 44.6870 87.6133   3
  12  -8  -4 44.7138 78.7008   0
  12   8  -4 62.3591 97.5669   0
 -11  -8   4 1830.26 209.439   2
  11  -8  -4 1771.39 220.769   3
  11   8  -4 2260.38 255.892   0
  11  -8  -4 1745.02 236.280   0
 -10  -8   4 1586.84 209.090   2
  10  -8  -4 1232.75 210.732   3
  10   8  -4 1781.45 308.153   0
  10  -8  -4 2030.28 296.730   0
  -9  -8   4 6504.36 322.746   2
   9   8  -4 7463.63 428.424   0
   9  -8  -4 7163.92 369.603   0
   9  -8  -4 7509.23 385.888   3
   8  -8  -4 565.095 225.230   0
   8   8  -4 270.102 182.160   0
   8  -8  -4 161.791 114.582   3
  -8  -8   4 45.3696 79.1458   2
   7   8  -4 5247.13 310.573   0
   7  -8  -4 5045.59 272.976   3
  -7   8   4 4528.11 153.837   1
   7  -8  -4 4037.13 196.569   0
  -7  -8   4 5496.73 331.113   2
  -6   8   4 5459.63 212.940   1
   6  -8  -4 6272.93 336.053   3
   6   8  -4 5331.52 229.078   0
  -6  -8   4 5322.21 272.439   2
   6  -8  -4 5508.81 229.561   0
  -5  -8   4 17589.1 273.876   3
   5  -8  -4 17525.1 371.255   3
   5   8  -4 18877.2 380.010   0
  -5   8   4 17708.2 353.805   1
   5  -8  -4 17534.6 301.655   0
  -5  -8   4 15960.4 334.991   2
  -4   8   4 3509.27 194.166   1
   4  -8  -4 4198.23 249.642   3
   4  -8  -4 4272.26 206.078   0
   4   8  -4 3976.21 205.775   0
  -4  -8   4 3402.46 151.913   3
  -4  -8   4 3565.25 226.195   2
  -3  -8   4 56.0448 50.4237   3
  -3   8   4 72.9132 73.9676   1
   3  -8  -4 182.052 112.587   3
  -3  -8   4 149.922 125.786   2
   2  -8  -4 3174.15 220.658   3
  -2   8   4 2954.82 243.061   1
  -2  -8   4 2728.40 228.787   2
  -2  -8   4 2998.43 163.096   3
  -1   8   4 428.701 191.244   1
   1  -8  -4 408.857 150.127   3
  -1  -8   4 296.433 83.4107   3
  -1  -8   4 480.473 167.495   2
   0   8   4 1585.22 252.799   1
   0  -8   4 1136.59 140.391   2
   0  -8   4 1350.00 148.285   3
   0  -8  -4 1350.39 144.806   3
   1   8   4 329.206 206.788   1
  -1  -8  -4 140.675 117.512   3
   1  -8   4 219.775 111.490   2
   1  -8   4 110.086 67.2927   3
   2   8   4 2080.42 228.104   1
   2  -8   4 2265.82 155.050   0
   2   8   4 2300.91 152.183   0
   2  -8   4 2382.54 191.159   3
   2  -8   4 2619.99 280.054   2
   3   8   4 759.791 163.721   1
   3   8   4 789.134 104.117   0
   3  -8   4 1549.94 154.182   3
   3  -8   4 2087.25 162.972   0
   3  -8   4 2907.36 276.124   2
   4   8   4 19827.0 468.163   1
   4  -8   4 20061.7 427.202   3
   4  -8   4 17723.4 301.986   0
   4  -8   4 21323.8 516.749   2
   4   8   4 20190.0 360.360   0
   5   8   4 10994.9 329.124   1
   5  -8   4 12423.6 398.553   3
   5   8   4 11340.6 341.575   0
   5  -8   4 11559.0 324.536   0
   5  -8   4 11366.3 364.146   2
   6  -8   4 263.736 160.740   3
   6  -8   4 132.981 168.324   2
   6  -8   4 245.172 103.654   0
   6   8   4 181.093 103.503   0
   6   8   4 97.8779 99.8548   1
   7  -8   4 5467.71 328.743   3
   7   8   4 5129.46 307.100   0
   7  -8   4 5522.48 298.504   0
   7   8   4 4037.47 240.129   1
   8   8   4 2207.86 287.602   1
   8   8   4 910.776 199.256   0
   8  -8   4 1222.71 280.326   3
   8  -8   4 1442.00 229.666   0
   9  -8   4 667.206 168.734   0
   9   8   4 795.195 195.422   0
   9  -8   4 745.720 185.895   3
   9   8   4 1267.05 270.395   1
  10  -8   4 70.1786 91.6312   0
  10   8   4 102.464 93.9969   0
  10   8   4 193.404 162.666   1
  10  -8   4 63.3762 140.081   3
  11  -8   4 2776.35 378.704   3
  11  -8   4 3070.98 344.952   0
  11   8   4 3263.96 339.589   0
  12  -8   4 99.5742 152.099   0
  12  -8   4 48.0654 136.625   3
  12   8   4 118.248 185.471   0
  13  -8   4 141.846 185.401   3
  13  -8   4 173.577 162.344   0
  13   8   4 356.765 228.474   0
  14  -8   4 349.913 237.320   0
  14   8   4 211.286 239.434   0
  14  -8   4 524.597 247.319   3
  15  -8   4 382.556 249.008   0
  15   8   4 249.132 240.298   0
  17   9  -4 243.975 175.431   0
  17  -9  -4 944.764 285.864   0
  17  -9  -4 512.984 271.913   3
  16  -9  -4 523.499 285.939   0
  16  -9  -4 51.4461 127.053   3
  16   9  -4 317.450 240.313   0
  15  -9  -4 200.532 217.567   3
  15   9  -4 380.378 182.467   0
  15  -9  -4 344.050 198.431   0
  14  -9  -4 3258.56 399.307   3
 -14  -9   4 2990.57 369.493   2
  14  -9  -4 2775.71 337.544   0
  14   9  -4 2511.98 302.334   0
  13  -9  -4 2947.51 391.839   0
  13   9  -4 3113.97 382.933   0
 -13  -9   4 2869.93 311.429   2
  13  -9  -4 2164.04 312.090   3
 -12  -9   4 98.0488 122.756   2
  12  -9  -4 77.1108 92.8415   0
  12   9  -4 60.9101 129.246   0
  12  -9  -4 29.3456 101.230   3
 -11  -9   4 142.613 122.985   2
  11  -9  -4 228.482 172.537   3
  11   9  -4 53.8052 125.610   0
  11  -9  -4 106.571 121.257   0
  10  -9  -4 15074.3 480.331   3
  10   9  -4 15296.2 478.140   0
  10  -9  -4 15917.6 450.642   0
 -10  -9   4 15199.1 492.172   2
   9  -9  -4 46.2382 152.992   3
   9  -9  -4 160.928 125.431   0
  -9  -9   4 92.2005 137.309   2
   9   9  -4 93.6246 124.873   0
   8   9  -4 135.639 129.116   0
   8  -9  -4 310.734 163.203   0
   8  -9  -4 346.008 163.846   3
  -8  -9   4 78.3094 86.0104   2
  -7   9   4 5184.75 198.061   1
   7   9  -4 6820.70 320.418   0
   7  -9  -4 5818.01 366.070   3
   7  -9  -4 5936.76 264.086   0
  -7  -9   4 5284.82 308.476   2
  -6  -9   4 5387.94 230.820   3
  -6   9   4 4809.39 205.593   1
   6  -9  -4 5249.83 281.329   3
   6   9  -4 4286.49 202.302   0
   6  -9  -4 4347.69 194.731   0
  -6  -9   4 4587.21 225.949   2
   5   9  -4 1091.66 131.338   0
  -5   9   4 1168.61 156.997   1
   5  -9  -4 1372.93 247.217   3
  -5  -9   4 991.073 141.473   3
   5  -9  -4 1143.75 160.744   0
  -5  -9   4 891.151 150.431   2
  -4  -9   4 19902.8 284.980   3
  -4   9   4 21107.5 391.612   1
   4  -9  -4 20691.6 281.885   0
  -4  -9   4 20692.9 406.395   2
   4   9  -4 21619.2 330.455   0
   4  -9  -4 19954.0 357.044   3
  -3   9   4 350.378 169.333   1
  -3  -9   4 97.3676 56.7350   3
  -3  -9   4 159.812 133.338   2
   3  -9  -4 71.3294 108.799   3
   3   9  -4 106.028 95.6492   0
  -2   9   4 1876.87 261.987   1
   2  -9  -4 1522.13 197.197   3
  -2  -9   4 1165.31 145.111   3
  -2  -9   4 2356.38 261.258   2
  -1   9   4 31212.1 483.761   1
  -1  -9   4 27441.9 326.984   3
   1  -9  -4 30687.8 461.691   3
  -1  -9   4 28876.5 429.839   2
   0   9   4 2764.30 292.322   1
   0  -9   4 1324.99 147.852   2
   0  -9   4 1485.03 133.612   3
   0  -9  -4 1700.39 186.813   3
   1  -9   4 795.495 119.095   3
   1   9   4 1034.29 235.875   1
  -1  -9  -4 963.526 208.714   3
   1  -9   4 802.625 145.603   2
   2  -9   4 15015.9 372.669   2
   2   9   4 14692.0 408.907   1
   2  -9   4 14291.5 340.878   3
  -2  -9  -4 16014.7 396.962   3
   2   9   4 14713.6 244.147   0
   3   9   4 37752.2 650.017   1
   3  -9   4 39034.0 382.675   0
  -3  -9  -4 39367.3 272.995   2
   3  -9   4 32877.6 397.886   3
   3  -9   4 39415.7 530.255   2
   3   9   4 38741.2 395.365   0
   4   9   4 1196.62 152.231   1
   4  -9   4 1048.30 131.852   3
   4  -9   4 1739.09 193.257   0
   4   9   4 1470.96 179.680   0
   4  -9   4 1623.21 255.885   2
   5   9   4 806.816 122.449   1
   5  -9   4 1551.66 260.269   3
   5  -9   4 1162.05 248.060   2
   5   9   4 1121.35 176.070   0
   5  -9   4 1216.49 168.660   0
   6   9   4 12.0239 108.780   1
   6  -9   4 158.179 117.192   0
   6  -9   4 90.4648 167.199   2
   6  -9   4 67.8813 75.3934   3
   6   9   4 103.041 96.6568   0
   7  -9   4 190.488 126.666   0
   7   9   4 321.855 197.738   0
   7   9   4 33.8916 86.0444   1
   7  -9   4 94.5263 93.2683   3
   8   9   4 6468.17 342.942   1
   8  -9   4 8716.53 461.329   3
   8   9   4 8905.34 369.568   0
   8  -9   4 8830.32 382.716   0
   9  -9   4 1663.75 216.981   0
   9   9   4 1640.53 192.536   0
   9  -9   4 1521.19 198.183   3
   9   9   4 2453.73 295.301   1
  10  -9   4 194.989 139.765   3
  10   9   4 278.384 119.979   0
  10  -9   4 439.130 161.006   0
  10   9   4 369.498 195.832   1
  11  -9   4 2594.15 300.322   3
  11  -9   4 3164.38 374.779   0
  11   9   4 3526.92 347.109   0
  11   9   4 3419.27 335.520   1
  12  -9   4 6629.42 450.573   0
  12   9   4 5694.52 391.458   0
  12  -9   4 5593.47 471.583   3
  13  -9   4 1269.04 251.019   0
  13  -9   4 1232.62 282.363   3
  13   9   4 1382.01 279.204   0
  14  -9   4 52.2939 201.000   3
  14   9   4 203.657 245.465   0
  14  -9   4 491.801 252.194   0
  15  -9   4 553.204 223.029   0
  15   9   4 822.492 333.549   0
  16  10  -4 324.248 232.959   0
  16 -10  -4 81.9562 167.624   3
  16 -10  -4 294.870 308.022   0
  15 -10  -4 813.181 274.319   0
  15  10  -4 777.659 302.921   0
  15 -10  -4 643.459 296.349   3
  14  10  -4 2008.85 287.115   0
  14 -10  -4 2580.27 381.188   3
  14 -10  -4 2380.52 383.262   0
  13 -10  -4 4300.07 410.178   3
  13  10  -4 4748.68 426.780   0
  13 -10  -4 4442.03 336.543   0
 -13 -10   4 4672.80 367.445   2
  12 -10  -4 2065.98 268.608   3
  12 -10  -4 1611.60 258.950   0
  12  10  -4 1228.00 188.732   0
 -12 -10   4 1374.71 190.695   2
  11 -10  -4 3793.83 354.699   3
  11  10  -4 2967.14 266.797   0
  11 -10  -4 2925.24 266.872   0
 -11 -10   4 3981.18 333.479   2
  10 -10  -4 302.331 186.546   3
  10 -10  -4 73.7040 115.337   0
  10  10  -4 153.369 128.490   0
 -10 -10   4 192.118 154.882   2
   9 -10  -4 4652.87 279.832   0
   9 -10  -4 4351.13 306.246   3
   9  10  -4 4535.46 307.140   0
  -9 -10   4 3602.01 294.688   2
   8  10  -4 749.005 268.640   0
   8 -10  -4 322.725 143.367   0
   8 -10  -4 367.108 189.436   3
  -8 -10   4 216.213 140.004   2
  -7  10   4 437.788 112.594   1
   7 -10  -4 755.657 160.784   0
   7 -10  -4 561.588 213.498   3
  -7 -10   4 561.440 137.395   3
   7  10  -4 721.505 164.306   0
  -7 -10   4 492.417 212.181   2
  -6  10   4 1687.26 245.102   1
   6 -10  -4 1211.49 178.981   3
   6 -10  -4 1206.23 137.964   0
  -6 -10   4 1309.34 170.218   3
   6  10  -4 1689.82 187.918   0
  -6 -10   4 1071.21 174.976   2
   5 -10  -4 11518.2 267.820   0
  -5  10   4 11356.5 328.292   1
   5 -10  -4 13684.1 413.798   3
  -5 -10   4 10798.6 278.703   3
   5  10  -4 11078.8 279.228   0
  -5 -10   4 11120.2 362.028   2
  -4  10   4 603.661 222.879   1
   4 -10  -4 300.244 187.640   3
  -4 -10   4 189.854 73.6693   3
   4 -10  -4 405.264 124.926   0
   4  10  -4 447.414 115.924   0
  -4 -10   4 453.434 196.968   2
  -3  10   4 7568.69 365.580   1
   3 -10  -4 5499.40 307.863   3
  -3 -10   4 5709.23 238.971   3
   3  10  -4 5772.54 196.619   0
  -3 -10   4 5912.28 328.048   2
  -2  10   4 16654.4 471.831   1
   2 -10  -4 15043.7 367.215   3
  -2 -10   4 14907.5 314.269   3
  -2 -10   4 15628.8 420.183   2
  -1  10   4 1978.74 326.980   1
  -1 -10   4 536.808 143.043   3
   1 -10  -4 1026.10 195.260   3
  -1 -10   4 493.533 111.009   2
   0  10   4 3185.76 322.436   1
   0 -10   4 1806.70 181.200   3
   0 -10   4 1522.93 158.760   2
   0 -10  -4 1787.76 203.399   3
   1  10   4 935.877 244.471   1
   1 -10   4 524.670 137.382   3
  -1 -10  -4 519.440 201.106   3
   1 -10   4 509.438 202.750   2
   2  10   4 266.698 185.210   1
   2  10   4 255.685 79.9744   0
   2 -10   4 214.203 77.7091   3
  -2 -10  -4 499.354 193.426   3
   2 -10   4 1619.30 289.864   2
   3  10   4 445.922 116.734   0
   3  10   4 432.350 131.878   1
   3 -10   4 182.315 76.2714   3
   3 -10   4 722.417 186.447   2
   3 -10   4 416.944 88.5496   0
  -3 -10  -4 718.846 111.485   2
   4  10   4 3312.56 193.965   1
   4 -10   4 3774.91 193.740   0
   4 -10   4 3116.63 243.792   2
   4 -10   4 3899.61 256.869   3
   4  10   4 1147.13 131.932   0
   5  10   4 500.685 241.717   1
   5 -10   4 408.838 172.841   3
   5  10   4 636.062 147.444   0
   5 -10   4 173.620 117.708   0
   5 -10   4 506.262 222.690   2
   6  10   4 135.299 132.002   1
   6  10   4 415.931 171.749   0
   6 -10   4 150.826 128.027   3
   6 -10   4 256.382 133.756   0
   6 -10   4 419.487 227.106   2
   7 -10   4 5269.09 292.306   0
   7 -10   4 4575.91 354.044   3
   7  10   4 5498.56 352.172   0
   7  10   4 3691.72 270.507   1
   8 -10   4 5550.52 315.159   0
   8 -10   4 5407.66 406.317   3
   8  10   4 5574.37 377.653   0
   8  10   4 3235.49 180.305   1
   9  10   4 45.7876 139.457   1
   9 -10   4 126.036 119.349   3
   9  10   4 130.368 99.5837   0
   9 -10   4 116.783 101.493   0
  10 -10   4 4022.92 376.362   3
  10 -10   4 3942.05 309.373   0
  10  10   4 3748.96 337.606   0
  10  10   4 4530.29 314.083   1
  11 -10   4 1513.61 345.353   3
  11 -10   4 1898.10 234.973   0
  11  10   4 1722.15 258.121   0
  11  10   4 2372.56 307.151   1
  12 -10   4 601.189 329.361   3
  12 -10   4 193.592 131.471   0
  12  10   4 356.059 157.882   0
  13 -10   4 650.905 263.567   0
  13 -10   4 764.832 278.898   3
  13  10   4 850.575 255.406   0
  14 -10   4 175.332 227.868   3
  14 -10   4 372.557 207.582   0
  14  10   4 79.9141 164.480   0
  15  10   4 231.083 193.355   0
  16 -11  -4 144.319 177.406   3
  16  11  -4 211.020 254.161   0
  15  11  -4 601.041 275.350   0
  15 -11  -4 208.610 165.281   3
  14 -11  -4 1628.74 299.663   3
  14  11  -4 2469.18 358.188   0
  13  11  -4 3508.26 353.539   0
 -13 -11   4 3501.99 363.789   2
  13 -11  -4 3788.59 365.389   3
  12 -11  -4 3046.60 252.341   0
  12  11  -4 3784.90 331.084   0
  12 -11  -4 3973.60 470.216   3
 -12 -11   4 4625.77 404.764   2
  11 -11  -4-3.89756 73.3354   0
  11 -11  -4 211.103 169.166   3
  11  11  -4-52.8678 87.7710   0
 -11 -11   4 569.700 198.193   2
  10 -11  -4 4148.98 274.902   0
  10  11  -4 4548.55 320.126   0
  10 -11  -4 6942.25 417.211   3
 -10 -11   4 4966.58 314.695   2
   9 -11  -4 6975.04 480.235   3
   9  11  -4 6141.75 361.075   0
   9 -11  -4 5671.60 322.896   0
  -9 -11   4 5299.89 328.429   2
   8 -11  -4 8283.41 407.391   3
  -8 -11   4 7819.17 296.507   3
   8  11  -4 8908.90 357.935   0
  -8 -11   4 7806.68 377.643   2
   8 -11  -4 8586.25 338.889   0
  -7  11   4 3685.95 224.873   1
   7  11  -4 4021.95 271.739   0
   7 -11  -4 3988.69 256.518   0
   7 -11  -4 4087.66 367.006   3
  -7 -11   4 4357.49 277.990   3
  -7 -11   4 3728.99 271.715   2
  -6  11   4 725.379 201.945   1
   6  11  -4 551.948 150.578   0
   6 -11  -4 435.818 124.877   0
   6 -11  -4 302.852 131.894   3
  -6 -11   4 398.745 171.750   3
  -6 -11   4 252.349 113.061   2
  -5  11   4 5495.72 324.850   1
   5 -11  -4 4831.45 315.918   3
   5  11  -4 4733.34 190.424   0
   5 -11  -4 4484.45 213.278   0
  -5 -11   4 4003.47 220.230   3
  -5 -11   4 4580.94 286.702   2
  -4  11   4 10747.8 437.649   1
   4 -11  -4 9163.00 226.706   0
  -4 -11   4 8974.20 267.080   3
  -4 -11   4 9456.48 382.035   2
   4 -11  -4 8759.50 328.042   3
   4  11  -4 8993.07 246.579   0
  -3  11   4 2720.20 285.782   1
   3  11  -4 2076.41 155.236   0
  -3 -11   4 1730.61 155.719   3
   3 -11  -4 1948.17 205.617   3
   3 -11  -4 2412.22 155.634   0
  -3 -11   4 2151.02 242.683   2
  -2  11   4 5154.54 394.544   1
  -2 -11   4 3946.04 252.402   3
   2 -11  -4 4436.72 319.629   3
  -2 -11   4 4698.59 373.557   2
   2  11  -4 4162.43 161.727   0
  -1 -11   4 10785.8 304.693   3
   1 -11  -4 11155.7 370.807   3
  -1  11   4 11731.5 437.052   1
  -1 -11   4 10624.9 344.196   2
   0  11   4 13717.5 545.564   1
   0 -11   4 11122.5 326.736   3
   0 -11  -4 11594.2 378.517   3
   0 -11   4 10011.3 354.384   2
   1  11   4 19102.3 498.021   1
   1 -11   4 18391.1 557.468   2
  -1 -11  -4 19033.1 519.435   3
   1 -11   4 16831.8 346.712   3
   2  11   4 21596.0 602.274   1
  -2 -11  -4 21167.0 538.751   3
   2 -11   4 20058.5 424.895   3
   2 -11   4 19676.0 494.639   2
   3 -11   4 65.3074 49.4914   0
   3  11   4 119.270 202.968   1
   3  11   4 156.206 83.7555   0
  -3 -11  -4-0.10925 30.5990   3
   3 -11   4 100.159 134.951   2
   3 -11   4 60.8057 97.9689   3
   4  11   4 2102.54 298.861   1
   4  11   4 1803.86 182.954   0
   4 -11   4 2097.21 353.194   2
   4 -11   4 1115.91 241.645   3
   4 -11   4 1588.68 150.249   0
   5  11   4 11711.1 504.705   1
   5 -11   4 11769.9 409.831   3
   5 -11   4 13354.1 471.074   2
   5 -11   4 11519.8 281.368   0
   5  11   4 12729.8 374.256   0
   6  11   4 515.217 178.070   1
   6 -11   4 867.222 237.732   3
   6 -11   4 636.424 158.426   0
   6 -11   4 1202.57 373.769   2
   6  11   4 677.747 170.960   0
   7  11   4 1065.53 236.478   1
   7 -11   4 1279.76 235.696   0
   7 -11   4 861.202 236.903   3
   7  11   4 1417.86 229.106   0
   8 -11   4 390.048 192.765   3
   8  11   4 157.633 99.1723   1
   8  11   4 581.929 199.567   0
   8 -11   4 456.430 170.264   0
   9 -11   4 26.1071 96.3958   3
   9 -11   4-5.30737 92.6861   0
   9  11   4 25.2251 106.178   0
   9  11   4-56.4616 91.2385   1
  10 -11   4 2451.23 377.329   3
  10 -11   4 1355.31 207.282   0
  10  11   4 1346.93 217.209   0
  10  11   4 2997.22 322.632   1
  11 -11   4 6663.24 493.727   3
  11  11   4 7873.22 387.000   1
  11  11   4 7473.04 435.665   0
  12 -11   4 4733.76 505.160   3
  12  11   4 5645.05 445.624   0
  13  11   4 94.9765 162.401   0
  13 -11   4-0.42354 91.4893   3
  14 -11   4 322.532 224.523   3
  14  11   4 185.269 199.905   0
  16 -12  -4 197.291 204.094   3
  15 -12  -4 162.540 189.098   3
  15  12  -4 178.101 234.085   0
  14 -12  -4 127.352 156.003   3
  14  12  -4 321.164 256.310   0
  13 -12  -4 1476.23 335.526   3
  13  12  -4 2054.82 300.437   0
  12 -12  -4 1036.40 295.373   3
  12  12  -4 603.659 133.990   0
 -12 -12   4 704.133 191.124   2
  11 -12  -4 5592.94 471.208   3
  11  12  -4 3769.25 259.906   0
 -11 -12   4 5887.15 434.323   2
  10  12  -4 1401.47 154.820   0
  10 -12  -4 2771.73 295.575   3
 -10 -12   4 2898.66 281.132   2
  -9 -12   4 1407.09 226.483   3
   9 -12  -4 839.630 210.429   3
   9  12  -4 652.788 178.986   0
  -9 -12   4 1292.05 270.760   2
  -8 -12   4 1947.32 241.693   3
   8  12  -4 1535.45 200.433   0
   8 -12  -4 1946.70 308.643   3
  -8 -12   4 1830.54 287.835   2
  -7 -12   4 4528.21 294.293   3
   7 -12  -4 5226.39 359.496   3
  -7 -12   4 4208.43 310.510   2
   7  12  -4 4771.64 238.691   0
   6  12  -4 4860.73 227.953   0
  -6  12   4 6188.33 356.532   1
   6 -12  -4 5014.97 330.203   3
  -6 -12   4 4533.82 275.000   3
  -6 -12   4 4568.71 312.002   2
  -5  12   4 836.439 230.701   1
  -5 -12   4 81.5003 77.3418   3
   5 -12  -4 272.491 156.159   3
  -5 -12   4 228.169 177.798   2
  -4  12   4 10730.8 390.004   1
   4 -12  -4 8524.10 346.319   3
  -4 -12   4 8238.71 271.736   3
  -4 -12   4 9060.86 319.707   2
  -3  12   4 20687.5 467.420   1
  -3 -12   4 17595.7 332.772   3
   3 -12  -4 20560.2 459.822   3
  -3 -12   4 20974.3 464.095   2
  -2  12   4 766.781 238.624   1
   2 -12  -4 1202.02 288.451   3
  -2 -12   4 200.019 95.7123   3
  -2 -12   4 166.372 98.7628   2
  -1  12   4 4884.98 355.080   1
  -1 -12   4 5858.96 289.446   3
   1 -12  -4 7079.55 391.092   3
  -1 -12   4 5122.41 351.091   2
   0  12   4 8644.11 461.956   1
   0 -12   4 7887.01 355.228   3
   0 -12   4 7133.45 335.894   2
   0 -12  -4 7693.25 386.941   3
   1  12   4 12302.3 592.499   1
   1 -12   4 10559.7 360.499   3
  -1 -12  -4 9750.10 408.698   3
   1 -12   4 9428.36 368.328   2
   2  12   4 3303.17 346.423   1
  -2 -12  -4 2955.58 251.701   3
   2 -12   4 2407.05 207.502   3
   2 -12   4 2417.93 208.504   2
   3  12   4 6679.60 459.274   1
   3 -12   4 4527.11 240.688   3
  -3 -12  -4 4925.14 382.209   3
   3 -12   4 4539.57 356.317   2
   4  12   4 4274.66 424.519   1
   4 -12   4 3020.73 276.254   3
   4  12   4 3427.77 202.061   0
   4 -12   4 3667.35 414.036   2
  -4 -12  -4 3815.29 371.831   3
   5  12   4 58.8737 156.785   1
   5 -12   4 67.7364 87.5507   3
   5  12   4 137.102 113.567   0
   5 -12   4 271.633 202.925   2
   6  12   4 12006.8 510.940   1
   6 -12   4 12610.1 518.060   3
   6 -12   4 13571.2 573.278   2
   6  12   4 12147.0 369.443   0
   7  12   4 62.5379 108.878   1
   7 -12   4 84.2225 110.954   3
   7  12   4 35.5760 81.1514   0
   8  12   4 305.824 140.719   1
   8  12   4 379.452 116.674   0
   8 -12   4 876.784 292.191   3
   9  12   4 1395.08 171.019   0
   9 -12   4 1688.71 278.290   3
   9  12   4 1370.46 225.610   1
  10 -12   4 4517.72 440.259   3
  10  12   4 3925.89 367.174   0
  10  12   4 4429.86 379.462   1
  11 -12   4 1081.96 302.427   3
  11  12   4 1142.79 259.586   0
  11  12   4 1399.30 267.165   1
  12  12   4 1063.16 253.896   0
  12 -12   4 956.449 390.197   3
  13 -12   4 509.050 230.169   3
  13  12   4 488.448 228.018   0
  15 -13  -4 209.071 201.129   3
  14 -13  -4 1096.35 320.388   3
  13 -13  -4 207.824 186.875   3
  12 -13  -4 566.636 222.035   3
 -12 -13   4 336.308 117.324   2
  11 -13  -4 373.068 219.008   3
 -11 -13   4 161.838 117.104   2
  10 -13  -4 1882.31 342.850   3
 -10 -13   4 3533.74 290.239   2
  -9 -13   4 3827.67 281.271   3
   9 -13  -4 4422.44 432.973   3
  -9 -13   4 4168.93 353.664   2
  -8 -13   4 3875.45 328.522   2
   8 -13  -4 4584.01 424.511   3
  -8 -13   4 4367.72 285.960   3
   7 -13  -4 3336.74 345.185   3
  -7 -13   4 2650.60 277.635   3
  -7 -13   4 2716.13 313.833   2
  -6  13   4 4499.51 334.685   1
  -6 -13   4 3130.32 261.906   3
   6 -13  -4 3098.92 257.321   3
  -6 -13   4 3371.17 279.788   2
  -5  13   4 1141.17 271.192   1
   5 -13  -4 245.795 213.499   3
  -5 -13   4 215.183 186.938   2
  -5 -13   4 98.5987 95.8738   3
  -4  13   4 3172.47 321.235   1
   4 -13  -4 2107.78 228.716   3
  -4 -13   4 2130.11 192.124   3
  -4 -13   4 2982.62 295.914   2
  -3  13   4 5471.89 418.346   1
  -3 -13   4 4488.17 276.058   3
  -3 -13   4 5755.29 383.773   2
   3 -13  -4 4756.63 288.965   3
  -2  13   4 3693.25 302.821   1
  -2 -13   4 4280.53 279.251   3
   2 -13  -4 5411.94 430.593   3
  -2 -13   4 4731.31 390.189   2
   1 -13  -4 496.826 206.659   3
  -1  13   4-14.0958 121.069   1
  -1 -13   4 166.502 137.277   3
  -1 -13   4 148.076 180.424   2
   0  13   4 1026.45 235.356   1
   0 -13   4 1412.26 239.847   3
   0 -13  -4 1261.08 291.092   3
   0 -13   4 903.831 197.974   2
   1 -13   4 11548.2 424.012   2
   1  13   4 14921.8 578.969   1
  -1 -13  -4 12861.4 498.299   3
   1 -13   4 11941.2 369.020   3
   2  13   4 5451.93 488.343   1
   2 -13   4 2516.59 208.243   2
   2 -13   4 2910.47 273.519   3
  -2 -13  -4 3614.21 381.809   3
   3  13   4 3911.01 403.960   1
   3 -13   4 2635.92 280.594   3
  -3 -13  -4 2727.61 289.001   3
   3 -13   4 2506.15 343.172   2
   4  13   4 108.881 121.902   1
   4 -13   4 30.0162 83.1098   3
  -4 -13  -4 36.6541 150.383   3
   4 -13   4 87.9678 101.305   2
   5 -13   4 4387.80 455.599   2
   5  13   4 3996.74 436.696   1
  -5 -13  -4 5115.27 453.681   3
   5 -13   4 3456.04 335.726   3
   6  13   4 90.6663 111.526   1
   6 -13   4 76.9189 116.268   3
   6 -13   4 342.196 285.909   2
   7  13   4 569.072 133.207   1
   7 -13   4 706.649 194.984   3
   8  13   4 129.415 121.007   1
   8 -13   4 146.129 143.277   3
   9 -13   4 315.823 168.323   3
   9  13   4 382.762 206.840   1
  10  13   4 567.683 205.585   1
  10 -13   4 448.044 213.097   3
  11 -13   4 3509.31 438.699   3
  11  13   4 4539.31 369.142   1
  12 -13   4 469.694 243.372   3
  13 -13   4 180.314 204.878   3
  14 -14  -4 345.331 195.416   3
  13 -14  -4 840.990 244.178   3
  12 -14  -4 32.2372 136.380   3
  11 -14  -4 471.442 221.627   3
 -11 -14   4 214.715 170.065   2
 -10 -14   4 207.994 210.819   2
  10 -14  -4 82.2345 189.320   3
  -9 -14   4 3252.79 349.491   2
   9 -14  -4 2740.95 357.271   3
  -8 -14   4 201.625 117.547   3
   8 -14  -4 260.344 159.077   3
  -8 -14   4 202.159 134.772   2
   7 -14  -4 771.465 280.604   3
  -7 -14   4 382.887 138.123   3
  -7 -14   4 252.612 108.926   2
  -6 -14   4 1642.84 199.518   3
  -6  14   4 2622.00 279.147   1
  -6 -14   4 1660.05 222.149   2
   6 -14  -4 1935.60 246.643   3
  -5  14   4 3397.26 351.857   1
  -5 -14   4 2500.91 252.133   3
   5 -14  -4 2646.57 277.272   3
  -5 -14   4 2868.55 279.721   2
  -4  14   4 1988.16 338.834   1
   4 -14  -4 699.557 154.182   3
  -4 -14   4 1079.25 200.722   3
  -4 -14   4 1573.83 304.086   2
  -3  14   4 430.621 217.544   1
  -3 -14   4 645.964 246.235   2
   3 -14  -4 278.529 222.070   3
  -3 -14   4 457.485 145.851   3
  -2  14   4 3168.41 273.847   1
   2 -14  -4 4458.56 412.474   3
  -2 -14   4 3598.76 266.249   3
  -2 -14   4 3507.22 277.846   2
   1 -14  -4 1167.14 213.081   3
  -1 -14   4 840.314 149.812   3
  -1  14   4 508.425 133.127   1
  -1 -14   4 1016.03 234.960   2
   0  14   4 135.415 149.945   1
   0 -14   4 128.623 125.154   3
   0 -14  -4 251.320 139.247   3
   0 -14   4 6.01546 96.9396   2
   1  14   4 2832.90 430.073   1
   1 -14   4 1325.74 217.156   2
   1 -14   4 1478.99 284.923   3
  -1 -14  -4 1800.93 286.872   3
   2  14   4 166.477 127.147   1
   2 -14   4 234.673 125.118   3
  -2 -14  -4 117.627 102.812   3
   2 -14   4 49.2193 96.6144   2
   3  14   4 1682.43 372.270   1
  -3 -14  -4 1039.28 271.745   3
   3 -14   4 1261.40 283.374   2
   3 -14   4 1026.37 224.953   3
   4  14   4 1907.70 315.853   1
   4 -14   4 1647.09 229.093   3
  -4 -14  -4 1826.40 258.622   3
   4 -14   4 1552.44 276.844   2
   5  14   4 546.360 221.068   1
   5 -14   4 667.836 306.742   2
  -5 -14  -4 539.899 211.763   3
   5 -14   4 58.7456 83.3785   3
   6  14   4 61.9679 132.863   1
   6 -14   4-12.9568 86.5580   3
  -6 -14  -4 67.7569 107.071   3
   6 -14   4 216.891 199.010   2
   7  14   4 2696.97 320.895   1
   7 -14   4 3035.87 303.461   3
   8  14   4 4316.69 392.073   1
   8 -14   4 3959.33 399.655   3
   9 -14   4 47.6072 123.035   3
   9  14   4 61.0630 136.796   1
  10 -14   4 181.666 189.986   3
  10  14   4 37.4550 116.650   1
  11 -14   4 153.433 164.078   3
  11  14   4 346.327 216.475   1
  12 -14   4 341.648 227.406   3
  14 -15  -4 110.228 183.220   3
  13 -15  -4 289.780 218.661   3
  12 -15  -4 89.4268 189.929   3
  11 -15  -4 464.434 247.317   3
  10 -15  -4 3639.07 335.998   3
 -10 -15   4 3599.95 343.258   2
   9 -15  -4 942.314 314.613   3
  -9 -15   4 638.338 214.641   2
   8 -15  -4 1554.61 307.240   3
  -8 -15   4 627.919 151.278   2
   7 -15  -4 239.174 184.421   3
  -7 -15   4 81.2283 84.9059   3
  -7 -15   4 70.6034 148.087   2
  -6  15   4 282.627 168.951   1
   6 -15  -4 246.735 201.391   3
  -6 -15   4 177.303 113.013   3
  -6 -15   4 138.283 95.3851   2
  -5  15   4 800.328 298.612   1
  -5 -15   4 519.038 192.542   3
  -5 -15   4 259.978 171.860   2
   5 -15  -4 199.690 185.819   3
  -4  15   4 242.018 209.060   1
  -4 -15   4 45.5044 77.8368   3
   4 -15  -4 34.9253 87.2024   3
  -4 -15   4-30.8425 78.5825   2
  -3  15   4 1525.56 318.026   1
  -3 -15   4 1073.55 224.388   3
   3 -15  -4 852.279 191.964   3
  -3 -15   4 643.124 169.915   2
  -2  15   4 394.922 238.648   1
  -2 -15   4 93.7438 97.9372   3
   2 -15  -4 3.34282 73.0102   3
  -2 -15   4 72.2956 91.7450   2
  -1  15   4 12458.3 500.977   1
   1 -15  -4 15042.2 527.432   3
  -1 -15   4 13392.7 433.889   3
  -1 -15   4 12833.4 554.747   2
   0  15   4 15236.4 680.098   1
   0 -15  -4 14309.2 517.417   3
   0 -15   4 13353.7 429.546   3
   0 -15   4 11813.5 512.215   2
   1  15   4 318.693 200.418   1
   1 -15   4 103.090 218.277   2
   1 -15   4 83.0766 111.968   3
  -1 -15  -4 455.239 226.718   3
   2 -15   4 368.515 190.547   3
   2  15   4 845.612 277.004   1
  -2 -15  -4 216.901 174.004   3
   2 -15   4 334.770 161.380   2
   3  15   4 1783.57 366.549   1
   3 -15   4 1602.19 309.508   3
  -3 -15  -4 1435.85 257.559   3
   3 -15   4 1856.83 338.545   2
   4  15   4 114.582 126.277   1
   4 -15   4 81.3749 158.430   2
  -4 -15  -4 51.0114 119.848   3
   4 -15   4 197.049 160.440   3
   5  15   4 255.730 234.879   1
   5 -15   4-140.578 70.4138   3
  -5 -15  -4 128.906 119.790   3
   5 -15   4 39.8363 175.943   2
   6  15   4 2512.38 380.561   1
   6 -15   4 1896.72 232.629   3
  -6 -15  -4 2991.23 424.333   3
   6 -15   4 3454.40 442.532   2
   7 -15   4 321.434 119.636   3
   7  15   4 494.039 285.350   1
  -7 -15  -4 960.743 331.336   3
   8  15   4 1374.80 348.664   1
   8 -15   4 1064.26 229.226   3
   9 -15   4 1151.76 281.966   3
   9  15   4 1405.23 308.085   1
  10 -15   4 135.270 213.069   3
  10  15   4 113.897 151.068   1
  11  15   4 411.282 271.269   1
  11 -15   4 351.336 224.305   3
  12 -15   4 1694.86 423.324   3
  13 -16  -4 243.476 189.755   3
  12 -16  -4 126.031 166.710   3
  11 -16  -4 1287.83 386.320   3
 -10 -16   4 1041.71 278.759   2
  10 -16  -4 251.164 173.224   3
   9 -16  -4 4551.89 438.800   3
  -9 -16   4 5683.86 400.946   2
   8 -16  -4 282.728 148.278   3
  -8 -16   4 406.656 168.611   2
   7 -16  -4 2347.37 376.378   3
  -7 -16   4 1637.04 230.098   3
  -7 -16   4 1497.79 192.335   2
  -6  16   4 379.643 173.727   1
  -6 -16   4 294.318 158.820   3
   6 -16  -4 427.606 169.333   3
  -6 -16   4 346.900 148.600   2
  -5  16   4 1665.33 257.349   1
   5 -16  -4 1143.53 270.536   3
  -5 -16   4 1016.66 196.337   3
  -5 -16   4 679.605 193.166   2
  -4 -16   4 2328.92 266.378   2
  -4  16   4 4194.18 368.055   1
   4 -16  -4 2402.74 276.102   3
  -4 -16   4 2891.60 262.222   3
  -3  16   4 6756.25 421.276   1
   3 -16  -4 5996.03 439.598   3
  -3 -16   4 5138.99 307.746   3
  -3 -16   4 4536.37 285.475   2
  -2  16   4 6041.29 374.074   1
   2 -16  -4 5796.30 452.721   3
  -2 -16   4 5087.17 332.038   3
  -2 -16   4 5065.84 387.866   2
  -1  16   4 1380.10 272.816   1
  -1 -16   4 906.410 211.457   3
  -1 -16   4 1273.05 283.838   2
   1 -16  -4 960.049 302.492   3
   0  16   4 9205.72 506.118   1
   0 -16  -4 6665.10 395.645   3
   0 -16   4 7073.53 458.815   2
   0 -16   4 7899.09 395.727   3
   1  16   4 2866.86 314.532   1
   1 -16   4 2764.97 361.833   2
  -1 -16  -4 2487.20 345.582   3
   1 -16   4 2026.79 281.544   3
  -2 -16  -4 912.704 242.032   3
   2  16   4 1368.83 318.606   1
   2 -16   4 699.444 209.370   3
   2 -16   4 998.356 316.685   2
   3  16   4 438.729 305.762   1
   3 -16   4 67.1571 102.969   3
  -3 -16  -4 138.632 185.316   3
   3 -16   4 34.8040 139.437   2
   4  16   4 990.394 295.438   1
   4 -16   4 936.923 278.872   2
  -4 -16  -4 794.618 270.800   3
   4 -16   4 508.486 140.923   3
   5  16   4 807.196 287.647   1
   5 -16   4 689.582 320.278   2
   5 -16   4 448.430 193.099   3
  -5 -16  -4 1027.51 268.433   3
   6  16   4 4453.44 517.161   1
   6 -16   4 3231.09 355.186   3
   6 -16   4 4935.26 443.526   2
  -6 -16  -4 5239.59 491.568   3
   7  16   4 7590.98 527.740   1
  -7 -16  -4 9089.29 578.689   3
   7 -16   4 6790.89 428.662   3
   8  16   4 902.289 302.422   1
   8 -16   4 655.155 224.785   3
  -8 -16  -4 723.090 296.119   3
  -9 -16  -4 11.6868 152.003   3
   9  16   4 127.060 200.492   1
   9 -16   4 81.1458 149.162   3
  10 -16   4 138.639 157.728   3
  10  16   4 162.674 218.437   1
  11 -16   4 242.901 207.348   3
  11  16   4 243.589 209.784   1
  12 -17  -4 493.285 248.986   3
  11 -17  -4 1199.20 323.369   3
  10 -17  -4 897.438 290.376   3
   9 -17  -4 578.096 252.015   3
  -9 -17   4 493.937 163.828   2
   8 -17  -4 3076.37 384.972   3
  -8 -17   4 4628.22 358.691   2
   7 -17  -4 233.455 225.490   3
  -7 -17   4 103.933 92.5051   2
  -6  17   4 1788.34 305.227   1
  -6 -17   4 1404.90 211.665   3
   6 -17  -4 1218.26 273.507   3
  -6 -17   4 1883.35 263.758   2
  -5  17   4 805.450 269.741   1
   5 -17  -4 180.207 119.664   3
  -5 -17   4 635.237 194.464   3
  -5 -17   4 143.220 123.537   2
  -4  17   4 617.429 247.062   1
   4 -17  -4 115.245 184.915   3
  -4 -17   4 98.4930 134.831   3
  -4 -17   4 58.8420 103.670   2
  -3  17   4 1810.14 314.225   1
   3 -17  -4 792.569 278.041   3
  -3 -17   4 750.728 195.728   3
  -3 -17   4 646.945 253.813   2
  -2  17   4 8522.09 551.031   1
  -2 -17   4 4944.54 394.427   2
  -2 -17   4 5584.90 349.081   3
   2 -17  -4 5338.12 442.838   3
  -1  17   4 8206.78 543.212   1
  -1 -17   4 5061.95 370.579   3
   1 -17  -4 5250.37 410.130   3
  -1 -17   4 5274.51 462.949   2
   0  17   4 1235.58 307.375   1
   0 -17   4 278.728 190.262   3
   0 -17   4 764.000 308.348   2
   0 -17  -4 128.804 104.659   3
   1  17   4 7292.37 476.223   1
   1 -17   4 5724.47 404.001   2
   1 -17   4 5451.49 392.291   3
  -1 -17  -4 4615.52 364.175   3
   2  17   4 2126.00 357.923   1
  -2 -17  -4 1269.36 294.872   3
   2 -17   4 1202.22 347.314   2
   2 -17   4 1845.64 313.982   3
   3  17   4 1654.65 402.547   1
   3 -17   4 1028.26 239.977   3
  -3 -17  -4 1352.76 346.458   3
   3 -17   4 681.214 216.392   2
  -4 -17  -4 583.836 181.072   3
   4  17   4 985.995 286.887   1
   4 -17   4 938.707 229.039   3
   4 -17   4 541.659 189.351   2
   5  17   4 2108.79 361.886   1
   5 -17   4 2019.10 327.417   3
   5 -17   4 1847.88 422.659   2
  -5 -17  -4 1580.34 308.904   3
   6 -17   4 663.192 210.945   3
   6  17   4 785.814 356.020   1
  -6 -17  -4 516.521 241.157   3
   7  17   4 1640.40 331.438   1
   7 -17   4 1303.43 283.140   3
  -7 -17  -4 1741.75 310.954   3
   8  17   4 4270.25 553.304   1
   8 -17   4 2733.93 347.139   3
  -8 -17  -4 3359.75 491.031   3
   9  17   4 1121.89 310.285   1
  -9 -17  -4 1354.14 308.439   3
   9 -17   4 1235.19 338.355   3
  10 -17   4 146.871 192.426   3
 -10 -17  -4 127.645 155.665   3
  10  17   4 144.288 167.628   1
  11  17   4 232.304 244.596   1
  11 -18  -4 216.726 192.103   3
  10 -18  -4 110.564 155.882   3
   9 -18  -4 691.697 242.080   3
   8 -18  -4 65.6018 137.538   3
  -8 -18   4 366.492 186.685   2
   7 -18  -4 1225.23 332.186   3
  -7 -18   4 1442.33 252.593   2
   6 -18  -4 34.8075 94.6421   3
  -6 -18   4 246.899 242.147   2
  -5  18   4 1344.16 354.989   1
   5 -18  -4 1491.85 326.203   3
  -5 -18   4 1036.31 226.579   3
  -5 -18   4 1019.98 271.563   2
  -4  18   4 3180.77 385.549   1
  -4 -18   4 3019.63 391.454   2
   4 -18  -4 2619.80 326.565   3
  -4 -18   4 2610.85 307.079   3
   3 -18  -4 2949.99 385.296   3
  -3  18   4 3176.72 301.104   1
  -3 -18   4 2770.30 320.399   3
  -3 -18   4 2842.95 320.607   2
  -2  18   4 2090.08 380.193   1
  -2 -18   4 860.344 216.813   3
   2 -18  -4 978.524 199.212   3
  -2 -18   4 830.005 220.104   2
  -1  18   4 332.157 253.516   1
  -1 -18   4-14.9962 77.0369   3
   1 -18  -4 44.8605 120.414   3
  -1 -18   4 222.980 203.586   2
   0  18   4 2330.82 350.545   1
   0 -18   4 649.956 164.989   3
   0 -18  -4 979.097 227.211   3
   0 -18   4 2013.14 347.452   2
   1  18   4 900.251 347.014   1
   1 -18   4 473.870 175.687   2
   1 -18   4 97.1786 109.253   3
  -1 -18  -4 312.472 248.956   3
   2  18   4 1405.54 431.992   1
   2 -18   4 899.566 253.062   3
  -2 -18  -4 899.342 233.124   3
   2 -18   4 579.550 230.393   2
   3  18   4 408.950 241.905   1
   3 -18   4 236.909 191.451   2
  -3 -18  -4 385.036 264.676   3
   3 -18   4 415.353 189.210   3
   4  18   4 158.468 219.305   1
   4 -18   4 192.237 183.305   3
  -4 -18  -4 161.488 139.017   3
   4 -18   4 146.449 199.942   2
   5  18   4 893.334 358.632   1
   5 -18   4 736.811 301.513   2
   5 -18   4 1273.21 364.974   3
  -5 -18  -4 792.137 231.047   3
   6  18   4 3015.67 461.176   1
  -6 -18  -4 2707.77 382.961   3
   6 -18   4 2942.85 390.160   3
   7  18   4 1929.68 480.088   1
  -7 -18  -4 1303.16 362.677   3
   7 -18   4 1349.13 306.485   3
   8  18   4 307.834 217.875   1
   8 -18   4 742.705 264.709   3
  -8 -18  -4 307.902 172.420   3
   9  18   4 212.912 223.842   1
   9 -18   4 1002.41 336.472   3
  -9 -18  -4 604.329 274.247   3
  10 -18   4 153.926 199.085   3
 -10 -18  -4 282.702 232.960   3
  10  18   4 236.506 213.402   1
  11  18   4 67.7702 125.423   1
  10 -19  -4 368.919 280.284   3
   9 -19  -4 37.9753 161.854   3
   8 -19  -4 178.519 195.457   3
  -8 -19   4 553.400 254.923   2
   7 -19  -4 74.9163 157.779   3
  -7 -19   4 120.188 190.494   2
   6 -19  -4 1121.21 266.417   3
  -6 -19   4 1570.39 306.249   2
  -5 -19   4 305.164 160.222   2
  -5  19   4 233.345 215.993   1
   5 -19  -4 463.679 295.769   3
  -4  19   4 158.469 187.690   1
  -4 -19   4 40.1418 133.491   3
   4 -19  -4 299.510 223.727   3
  -4 -19   4 27.9549 113.166   2
  -3  19   4 127.068 149.716   1
   3 -19  -4 30.9949 92.7906   3
  -3 -19   4 86.8884 114.884   3
  -3 -19   4 48.5351 110.427   2
  -2  19   4 411.240 231.429   1
  -2 -19   4 172.992 130.421   3
   2 -19  -4 210.301 165.652   3
  -2 -19   4 219.383 151.262   2
  -1  19   4 1236.51 303.670   1
   1 -19  -4 692.879 261.711   3
  -1 -19   4 530.001 137.684   3
  -1 -19   4 281.162 188.206   2
   0  19   4 303.908 226.461   1
   0 -19  -4 30.5213 130.178   3
   0 -19   4-10.7564 84.5847   3
   0 -19   4 165.438 146.638   2
  -1 -19  -4 263.044 163.121   3
   1  19   4 575.673 319.961   1
   1 -19   4 111.420 116.177   3
   1 -19   4 142.578 126.712   2
   2  19   4 48.6803 121.680   1
   2 -19   4 216.406 210.610   2
  -2 -19  -4 454.462 271.187   3
   2 -19   4 229.914 176.437   3
   3  19   4 405.103 215.308   1
  -3 -19  -4 464.135 204.089   3
   3 -19   4 560.698 222.986   3
   3 -19   4 667.327 293.653   2
   4  19   4 637.583 248.362   1
   4 -19   4 1131.99 311.200   3
  -4 -19  -4 963.925 267.208   3
   4 -19   4 616.647 254.705   2
   5  19   4 308.437 262.337   1
   5 -19   4 302.593 223.771   3
   5 -19   4 73.3880 147.810   2
  -5 -19  -4 110.656 158.563   3
   6  19   4 337.606 226.044   1
  -6 -19  -4 46.8918 169.076   3
   6 -19   4 53.1719 172.399   3
   7 -19   4 234.055 216.098   3
   7  19   4 157.661 237.375   1
  -7 -19  -4 166.661 190.348   3
   8  19   4 905.170 331.144   1
   8 -19   4 618.626 270.707   3
  -8 -19  -4 308.154 197.528   3
   9  19   4 82.3542 193.785   1
   9 -19   4 124.008 179.668   3
  -9 -19  -4 66.2133 138.973   3
   9 -20  -4 83.8501 148.465   3
   8 -20  -4 118.295 220.984   3
   7 -20  -4 393.160 254.162   3
  -7 -20   4 89.4828 140.117   2
   6 -20  -4 693.564 299.398   3
  -6 -20   4 439.725 211.178   2
  -5  20   4 2589.09 391.558   1
  -5 -20   4 2119.84 337.053   2
   5 -20  -4 2366.93 338.641   3
  -4  20   4 95.8397 149.519   1
   4 -20  -4 63.2221 146.391   3
  -4 -20   4 77.4964 156.491   2
  -3  20   4 373.567 204.670   1
  -3 -20   4 63.7383 121.266   3
   3 -20  -4 50.9857 179.780   3
  -3 -20   4 33.1589 97.7604   2
   2 -20  -4 212.055 169.741   3
  -2  20   4 298.674 196.170   1
  -2 -20   4 161.955 158.703   3
  -2 -20   4 75.5879 158.538   2
  -1  20   4 291.684 275.490   1
  -1 -20   4 19.4711 113.606   3
  -1 -20   4 40.4443 110.958   2
   1 -20  -4 165.357 162.684   3
   0  20   4 504.830 272.352   1
   0 -20   4-13.7910 111.449   3
   0 -20  -4 109.195 139.733   3
   0 -20   4 115.194 148.196   2
   1 -20   4 72.5060 118.571   3
   1  20   4 136.683 166.187   1
  -1 -20  -4 63.4356 172.982   3
   1 -20   4 113.291 146.536   2
   2 -20   4 32.9098 121.945   3
   2  20   4 170.404 200.025   1
  -2 -20  -4 110.413 162.706   3
   2 -20   4 125.143 132.136   2
   3  20   4 69.6849 144.779   1
   3 -20   4 82.9091 119.757   3
  -3 -20  -4 456.243 279.148   3
   3 -20   4 65.3722 130.713   2
   4  20   4 1900.08 400.286   1
   4 -20   4 1395.28 330.340   3
  -4 -20  -4 1154.33 253.290   3
   4 -20   4 1309.96 293.501   2
   5  20   4 497.906 235.330   1
  -5 -20  -4 1265.52 361.922   3
   5 -20   4 473.527 211.210   3
   5 -20   4 992.904 358.265   2
   6 -20   4 145.094 197.611   3
  -6 -20  -4-15.8207 82.3839   3
   6  20   4 130.208 187.229   1
   7 -20   4 760.242 291.853   3
   7  20   4 461.203 271.864   1
  -7 -20  -4 114.415 187.179   3
   8  20   4 88.8977 175.781   1
   8 -20   4 36.5742 160.467   3
  -8 -20  -4 195.414 206.653   3
   8 -21  -4 291.143 245.482   3
   7 -21  -4 1098.54 381.442   3
  -6 -21   4 1037.88 300.933   2
   6 -21  -4 1121.77 345.007   3
  -5 -21   4 195.358 190.413   2
   5 -21  -4 833.418 327.230   3
  -4  21   4 3003.61 453.155   1
   4 -21  -4 2564.70 425.254   3
  -4 -21   4 795.109 209.424   2
  -3  21   4 170.605 235.495   1
   3 -21  -4-19.2917 124.880   3
  -3 -21   4-5.53000 112.374   2
  -2 -21   4 198.400 158.428   3
  -2  21   4 629.778 340.493   1
  -2 -21   4 189.980 160.350   2
   2 -21  -4 97.2784 167.631   3
  -1  21   4 608.083 351.745   1
   1 -21  -4 278.651 186.898   3
  -1 -21   4 248.040 163.019   2
  -1 -21   4 133.988 126.344   3
   0  21   4 164.554 236.044   1
   0 -21  -4 58.3600 105.821   3
   0 -21   4 30.5843 128.073   2
   0 -21   4 30.0603 129.167   3
   1  21   4 721.382 352.271   1
   1 -21   4 314.853 209.636   3
  -1 -21  -4 141.179 142.966   3
   1 -21   4 266.062 229.843   2
   2  21   4 3589.67 449.874   1
  -2 -21  -4 4189.20 468.819   3
   2 -21   4 4021.59 499.707   2
   2 -21   4 3188.99 438.380   3
   3  21   4 2862.82 413.742   1
   3 -21   4 2344.87 389.899   3
  -3 -21  -4 2701.14 386.372   3
   3 -21   4 2622.73 340.835   2
   4 -21   4 750.945 306.835   2
   4  21   4 229.031 193.679   1
   4 -21   4 71.7492 141.348   3
  -4 -21  -4 243.171 211.956   3
   5  21   4 637.447 298.972   1
   5 -21   4 499.497 261.338   3
  -5 -21  -4 426.942 245.869   3
   6  21   4 149.327 217.890   1
   6 -21   4 110.061 172.622   3
  -6 -21  -4 180.367 190.216   3
   7 -21   4 71.3584 145.296   3
   5 -22  -4 1057.39 294.426   3
  -5 -22   4 608.163 301.743   2
  -4  22   4 666.696 268.710   1
   4 -22  -4 156.085 184.744   3
  -4 -22   4 295.567 230.437   2
   3 -22  -4 1418.23 357.100   3
  -3  22   4 2066.39 400.998   1
  -3 -22   4 1420.42 341.555   2
  -2  22   4 437.300 283.954   1
   2 -22  -4 64.8091 139.216   3
  -2 -22   4 382.245 221.898   2
  -1  22   4 748.026 319.128   1
   1 -22  -4 152.180 265.284   3
  -1 -22   4 151.536 157.475   2
  -1 -22   4 311.368 203.655   3
   0  22   4 470.547 293.611   1
   0 -22   4 62.6009 141.611   3
   0 -22   4 128.295 191.962   2
   0 -22  -4 62.7567 154.015   3
   1  22   4 1373.79 377.456   1
  -1 -22  -4 335.682 227.670   3
   1 -22   4 397.604 227.304   3
   1 -22   4 163.299 179.133   2
   2  22   4 492.759 263.111   1
   2 -22   4 248.531 226.013   3
  -2 -22  -4 235.738 221.727   3
   2 -22   4 95.7311 145.180   2
   3  22   4 2058.20 501.849   1
   3 -22   4 1899.88 442.384   3
   3 -22   4 1633.16 372.085   2
  -3 -22  -4 1484.04 360.295   3
   4  22   4 2162.28 440.749   1
  -4 -22  -4 1825.66 385.957   3
   4 -22   4 1010.56 305.321   3
   4 -22   4 2198.49 368.181   2
   5 -22   4 7.30554 98.7820   3
  -5 -23   4 508.083 290.109   2
  -4  23   4 1015.13 292.383   1
  -4 -23   4 1061.46 275.942   2
  -3  23   4 433.850 326.963   1
   3 -23  -4 223.673 276.695   3
  -3 -23   4 588.969 278.383   2
  -2  23   4 152.976 198.479   1
   2 -23  -4 76.4652 152.679   3
  -2 -23   4 117.078 179.004   2
  -1  23   4 853.499 340.057   1
   1 -23  -4 374.416 247.784   3
  -1 -23   4 224.724 235.119   2
   0  23   4 312.149 259.025   1
   0 -23   4 414.348 307.256   2
   0 -23   4 454.425 272.177   3
   0 -23  -4 475.839 317.389   3
   1 -23   4 958.262 321.520   3
   1  23   4 1302.78 347.009   1
   1 -23   4 601.036 265.366   2
  -1 -23  -4 1035.48 308.252   3
   2 -23   4 1127.19 299.571   3
   3 -23   4 320.910 231.740   3
   4 -23   4 131.258 215.632   3
   2 -24   4 82.3170 131.243   3
 -18   0   5 5600.35 548.696   2
  18   0  -5 3846.38 365.932   0
 -17   0   5 1992.52 337.251   2
  17   0  -5 1730.66 412.572   0
 -16   0   5 7.98497 113.836   2
  16   0  -5 32.6186 129.564   0
 -15   0   5 52.3825 124.084   2
  15   0  -5 31.3652 120.437   0
 -14   0   5 224.640 175.330   2
  14   0  -5 52.9881 127.913   0
 -13   0   5 349.801 210.000   2
  13   0  -5 50.5008 127.230   0
  12   0  -5 8022.33 466.903   0
 -12   0   5 9561.87 498.465   2
  11   0  -5 29959.7 576.068   0
  10   0  -5 3669.55 217.929   3
  10   0  -5 9937.48 555.894   0
   9   0  -5 39481.0 616.422   0
   9   0  -5 39020.2 430.175   3
   8   0  -5 34203.3 505.928   0
   8   0  -5 35278.4 353.988   3
   7   0  -5 6363.23 315.973   0
  -7   0   5 6917.12 160.546   1
   7   0  -5 6466.09 180.290   3
  -6   0   5 6293.74 290.399   2
  -6   0   5 5518.10 165.146   1
   6   0  -5 5395.27 144.319   3
   6   0  -5 5555.99 234.324   0
  -5   0   5 5032.45 250.456   2
   5   0  -5 4568.00 116.473   3
  -5   0   5 4568.79 142.619   1
  -4   0   5 56744.0 448.482   2
  -4   0   5 58209.9 360.640   1
   4   0  -5 55521.9 233.204   3
  -3   0   5 15326.6 246.447   2
  -3   0   5 15325.8 227.848   1
   3   0  -5 15750.7 118.178   3
  -2   0   5 110648. 464.809   2
  -2   0   5 94562.3 436.876   1
   2   0  -5 109746. 260.951   3
  -1   0   5 579.939 109.054   2
  -1   0   5 410.863 80.4362   1
   0   0   5 6812.87 163.913   1
   0   0   5 7332.78 165.398   2
   1   0   5 95522.7 549.339   0
   1   0   5 88041.8 344.995   2
   1   0   5 91638.7 526.955   1
   2   0   5 1942.48 199.571   0
   2   0   5 1620.02 162.758   1
   2   0   5 1665.01 100.340   2
   3   0   5 2652.50 176.051   0
   3   0   5 2686.27 187.319   1
   3   0   5 2719.82 125.689   2
   4   0   5 23.7812 53.0094   0
   4   0   5 88.4380 94.1159   1
   5   0   5 10889.0 292.655   1
   5   0   5 10499.9 293.995   0
   6   0   5 1369.48 225.087   0
   6   0   5 955.527 183.464   1
   7   0   5 57022.1 675.991   0
   7   0   5 55971.9 530.854   1
   8   0   5 10289.3 487.239   0
   8   0   5 10624.0 390.454   1
   9   0   5-4.97445 97.6648   0
   9   0   5 151.353 98.8106   1
  10   0   5 1073.17 309.924   0
  11   0   5 3530.00 341.981   0
  12   0   5 309.546 175.137   0
  13   0   5 35.0834 139.864   0
  14   0   5 215.053 223.418   0
  15   0   5 727.803 278.411   0
 -18  -1   5 364.077 281.246   2
 -18   1   5 354.291 232.152   2
  18  -1  -5 133.856 234.810   0
  18   1  -5 140.615 212.014   0
  17  -1  -5 912.404 314.276   0
 -17  -1   5 1012.44 275.812   2
 -17   1   5 1639.63 341.926   2
  17   1  -5 1254.08 287.434   0
 -16  -1   5 155.836 184.164   2
 -16   1   5 159.693 186.638   2
  16  -1  -5 168.106 143.992   0
  16   1  -5 16.2810 134.708   0
 -15  -1   5 3.37438 97.0044   2
 -15   1   5 37.5157 128.401   2
  15  -1  -5 43.6311 132.239   0
  15   1  -5 24.7052 88.8429   0
 -14  -1   5 422.821 209.561   2
  14  -1  -5 412.259 186.656   0
  14   1  -5 245.086 209.164   0
 -13  -1   5 1596.99 283.440   2
  13  -1  -5 1128.77 191.200   0
  13   1  -5 901.476 221.462   0
  12  -1  -5 7228.79 425.547   0
 -12  -1   5 8626.99 428.733   2
  12   1  -5 7345.40 429.030   0
  12  -1  -5 6271.17 290.226   3
 -11  -1   5 19158.1 612.728   2
  11   1  -5 17780.2 526.275   0
  11  -1  -5 17419.6 521.052   0
  11  -1  -5 13054.5 385.236   3
 -10  -1   5 71318.8 798.042   2
  10  -1  -5 59768.5 811.167   0
  10   1  -5 55344.1 737.722   0
  10  -1  -5 58479.1 571.264   3
  -9  -1   5 11151.9 462.431   2
   9  -1  -5 7882.90 328.646   3
   9   1  -5 8058.23 421.880   0
   9  -1  -5 7841.63 422.482   0
  -8  -1   5 871.034 241.322   2
   8   1  -5 394.634 215.343   0
   8  -1  -5 644.712 120.371   3
   8  -1  -5 554.519 195.483   0
   7  -1  -5 163.066 163.540   0
  -7  -1   5 83.8865 86.1641   2
  -7   1   5 115.760 56.5788   1
   7  -1  -5 208.163 110.068   3
   7   1  -5 204.486 159.980   0
  -6  -1   5 350.394 161.037   2
   6   1  -5 82.6518 160.179   0
   6   1  -5 232.071 85.7789   3
   6  -1  -5 203.490 88.5163   3
  -6   1   5 345.204 86.3350   1
  -6  -1   5 341.753 99.5206   1
   6  -1  -5 295.753 175.758   0
  -5  -1   5 383.637 159.866   2
   5   1  -5 208.983 56.3760   3
   5  -1  -5 250.610 77.5780   3
  -5   1   5 122.736 48.6608   1
  -5  -1   5 178.802 91.3012   1
  -4  -1   5 16540.3 299.712   2
  -4   1   5 17386.1 235.646   1
  -4  -1   5 16930.9 244.301   1
   4  -1  -5 17038.5 169.017   3
   4   1  -5 16184.9 108.125   3
  -3  -1   5 51561.8 377.020   2
  -3   1   5 57324.0 402.736   2
   3  -1  -5 55764.1 243.277   3
  -3   1   5 55908.4 366.102   1
  -3  -1   5 57544.0 377.706   1
  -2   1   5 5570.28 164.538   2
  -2  -1   5 6350.39 203.848   1
   2  -1  -5 5576.66 111.925   3
  -2   1   5 5692.44 155.577   1
  -2  -1   5 5645.54 170.391   2
  -1  -1   5 112905. 462.528   2
  -1   1   5 110616. 402.321   2
  -1  -1   5 120660. 525.039   1
  -1   1   5 125447. 556.878   1
   0   1   5 57618.2 275.698   2
   0  -1   5 63840.8 434.030   1
   0   1   5 62844.2 423.101   1
   0  -1   5 62941.1 359.568   2
   1   1   5 25607.5 295.039   0
   1  -1   5 26305.8 299.268   0
   1  -1   5 2024.10 175.637   1
   1  -1   5 25335.0 255.626   2
   1   1   5 24662.7 187.315   2
   1   1   5 24437.9 302.019   1
   2  -1   5 11025.4 263.071   1
   2  -1   5 11720.3 266.198   0
   2   1   5 11469.2 269.376   0
   2   1   5 11613.7 272.495   1
   2   1   5 11587.1 135.550   2
   2  -1   5 11312.0 191.979   2
   3   1   5 1607.70 148.672   0
   3  -1   5 1173.04 149.944   1
   3   1   5 1458.65 85.1768   2
   3  -1   5 1670.81 130.572   2
   3  -1   5 1244.69 163.574   0
   3   1   5 1892.79 189.490   1
   4   1   5 327.368 115.452   0
   4  -1   5 406.444 143.976   1
   4  -1   5 419.704 129.801   0
   4  -1   5 636.281 128.813   2
   4   1   5 668.376 172.229   1
   5  -1   5 52.5543 55.1449   1
   5  -1   5 107.893 100.588   0
   5   1   5 52.9595 60.7350   0
   5   1   5 160.728 97.6262   1
   6   1   5 20602.0 379.402   1
   6  -1   5 21887.8 454.322   0
   6   1   5 21391.9 486.101   0
   6  -1   5 18104.2 324.338   1
   7   1   5 297.316 151.052   1
   7   1   5 385.257 176.204   0
   7  -1   5 474.972 159.604   1
   7  -1   5 1608.14 279.682   0
   8  -1   5 26118.1 406.905   1
   8   1   5 25362.4 448.569   1
   8  -1   5 25580.2 598.958   0
   8   1   5 25379.9 613.302   0
   9   1   5 10529.2 373.299   0
   9  -1   5 11804.0 307.826   1
   9  -1   5 10772.3 442.055   0
   9   1   5 12219.4 335.298   1
  10  -1   5 10796.2 504.903   0
  10   1   5 11772.5 608.746   0
  11  -1   5 2412.31 282.754   0
  11   1   5 2987.44 370.101   0
  12  -1   5 101.731 140.425   0
  12   1   5 75.0565 140.530   0
  13   1   5 95.0137 150.989   0
  13  -1   5 50.1120 117.125   0
  14   1   5 130.729 170.546   0
  14  -1   5 94.4242 150.251   0
  15  -1   5 2099.43 402.318   0
  15   1   5 1577.27 403.724   0
 -18  -2   5 647.757 309.811   2
 -18   2   5 1191.10 410.889   2
  18  -2  -5 643.017 297.876   0
  18   2  -5 548.322 352.930   0
 -17  -2   5 92.7845 137.083   2
 -17   2   5 238.104 232.297   2
  17  -2  -5 26.1752 166.795   0
  17   2  -5 139.162 191.547   0
 -16  -2   5 57.9293 136.410   2
  16   2  -5-35.3550 114.813   0
  16  -2  -5 24.8621 105.173   0
 -15  -2   5 173.366 175.329   2
  15  -2  -5 210.324 131.400   0
  15   2  -5 54.1431 111.523   0
 -14  -2   5 59.2237 102.099   2
  14   2  -5 99.0640 152.035   0
  14  -2  -5 39.7537 151.063   0
 -13  -2   5 2704.92 295.143   2
  13  -2  -5 2389.84 249.181   3
  13   2  -5 2277.00 308.362   0
  13  -2  -5 2281.45 302.989   0
  12  -2  -5 4963.56 426.700   0
  12   2  -5 4417.65 421.390   0
 -12  -2   5 4398.92 339.747   2
  12  -2  -5 5288.84 335.900   3
 -11  -2   5 13508.8 452.651   2
  11  -2  -5 13240.1 397.833   3
  11  -2  -5 18354.0 557.520   0
  11   2  -5 20310.0 653.320   0
 -10  -2   5 15100.3 439.696   2
  10  -2  -5 13788.4 434.952   3
  10  -2  -5 15448.3 536.325   0
  10   2  -5 15473.7 567.794   0
  -9  -2   5 21294.7 540.598   2
   9   2  -5 21288.2 572.415   0
   9  -2  -5 20625.9 489.890   0
   9  -2  -5 21484.0 394.176   3
   8  -2  -5 696.113 140.042   3
  -8  -2   5 290.638 143.254   2
   8   2  -5 259.973 124.271   0
  -8   2   5 418.693 50.8048   1
   8  -2  -5 1079.87 258.584   0
  -7  -2   5 46.4526 77.5413   2
  -7   2   5 32.7609 29.8659   1
   7  -2  -5 34.4527 45.0866   3
   7   2  -5 789.580 249.308   0
   7  -2  -5 126.011 140.369   0
  -6  -2   5 2102.34 202.107   2
   6  -2  -5 2025.53 222.777   0
  -6   2   5 1949.53 103.196   1
   6  -2  -5 1989.84 121.065   3
   6   2  -5 2389.08 249.153   0
  -5  -2   5 8615.01 259.822   2
  -5  -2   5 8605.13 218.160   1
   5  -2  -5 8437.23 187.085   3
  -5   2   5 6817.03 130.285   1
  -4  -2   5 3457.28 160.388   2
   4  -2  -5 4030.67 131.151   3
  -4  -2   5 3734.99 142.927   1
  -4   2   5 3914.75 167.554   1
  -3  -2   5 1558.66 129.140   2
  -3   2   5 2615.02 112.799   1
  -3  -2   5 2616.74 134.689   1
   3  -2  -5 2707.91 101.763   3
  -2  -2   5 70182.0 458.405   1
  -2   2   5 67532.4 388.745   2
   2  -2  -5 64308.3 309.247   3
  -2   2   5 68265.7 402.226   1
  -2  -2   5 63346.6 422.470   2
  -1   2   5 3704.49 122.888   2
  -1  -2   5 4043.33 166.575   1
  -1  -2   5 3818.04 140.272   2
  -1   2   5 3769.68 140.941   1
   0  -2   5 46535.1 342.664   2
   0   2   5 43840.0 229.342   2
   0   2   5 46824.6 372.102   1
   0  -2   5 47870.8 412.556   1
   1  -2   5 1243.40 182.185   0
   1  -2   5 1109.53 184.840   1
   1   2   5 899.213 161.743   1
   1  -2   5 798.994 103.791   2
   1   2   5 1124.99 160.372   0
   1   2   5 905.602 66.1298   2
   2   2   5 23029.8 361.478   0
   2   2   5 20674.1 313.420   1
   2  -2   5 20434.3 311.367   1
   2   2   5 20511.5 125.748   2
   2  -2   5 20402.2 249.856   2
   2  -2   5 21066.1 312.724   0
   3  -2   5 5166.80 178.588   0
   3  -2   5 8762.38 245.408   1
   3  -2   5 7987.37 194.162   2
   3   2   5 8388.68 208.327   0
   3   2   5 8308.92 231.521   1
   4  -2   5 8392.78 241.906   1
   4  -2   5 8898.19 297.961   0
   4   2   5 9003.96 297.962   0
   4   2   5 8186.53 233.290   1
   4  -2   5 8356.42 202.636   2
   5  -2   5 398.452 145.217   0
   5  -2   5 227.939 104.999   1
   5   2   5 323.828 160.930   0
   5   2   5 124.838 68.2975   1
   6  -2   5 3032.52 265.804   1
   6  -2   5 4357.71 383.712   0
   6   2   5 2851.75 223.820   1
   6   2   5 3447.09 293.811   0
   7  -2   5 23613.2 392.575   1
   7   2   5 20725.4 396.616   1
   7  -2   5 22858.4 502.719   0
   7   2   5 21645.7 504.596   0
   8  -2   5 7139.98 336.347   1
   8  -2   5 7127.52 471.817   0
   8   2   5 6959.95 410.631   0
   8   2   5 5178.34 263.685   1
   9  -2   5 91.9144 100.351   1
   9   2   5 130.823 105.779   1
   9  -2   5 127.540 109.442   0
   9   2   5 196.905 137.501   0
  10  -2   5 194.874 195.991   0
  10   2   5 191.419 111.497   0
  11  -2   5 365.631 207.485   0
  11   2   5 653.229 284.011   0
  12   2   5 3335.96 430.970   0
  12  -2   5 2759.83 402.349   0
  13  -2   5 16.4655 82.1122   0
  13   2   5 18.4515 139.569   0
  14  -2   5 184.175 177.371   0
  14   2   5 151.666 199.788   0
  15  -2   5 476.315 263.632   0
  15   2   5 202.725 210.006   0
 -18  -3   5 218.211 197.768   2
 -18   3   5 219.914 225.301   2
  18  -3  -5 521.023 273.199   0
 -17  -3   5 13.9969 112.775   2
  17  -3  -5 0.85097 76.4630   0
  17   3  -5 133.300 169.500   0
 -16  -3   5 315.720 198.943   2
  16   3  -5 158.883 185.639   0
  16  -3  -5 301.749 220.319   0
 -15  -3   5 16.7959 129.304   2
  15  -3  -5 69.3923 165.100   0
  15   3  -5 327.932 239.906   0
 -14  -3   5 3009.95 348.962   2
  14  -3  -5 2658.14 243.760   3
  14  -3  -5 3622.16 468.237   0
  14   3  -5 3159.48 399.880   0
 -13  -3   5 232.908 182.819   2
  13  -3  -5 510.484 202.121   3
  13   3  -5 331.275 223.860   0
  13  -3  -5 195.600 182.393   0
  12  -3  -5 336.761 215.002   0
 -12  -3   5 300.395 181.489   2
  12  -3  -5 340.068 145.111   3
  12   3  -5 272.280 197.286   0
 -11  -3   5 19427.0 506.090   2
  11  -3  -5 23800.3 539.796   0
  11   3  -5 24368.6 589.649   0
  11  -3  -5 20016.2 431.703   3
 -10  -3   5 3933.55 390.528   2
  10   3  -5 4341.45 368.144   0
  10  -3  -5 3689.46 348.721   0
  10  -3  -5 5137.27 287.592   3
  -9  -3   5 9686.14 426.029   2
   9  -3  -5 9644.46 323.417   3
   9   3  -5 9984.75 438.459   0
   9  -3  -5 10225.3 466.093   0
  -8   3   5 2279.85 69.2968   1
   8   3  -5 3143.83 339.278   0
  -8  -3   5 2404.32 221.379   2
   8  -3  -5 2301.02 286.934   0
   8  -3  -5 2505.52 205.071   3
  -7  -3   5 26518.9 458.925   2
  -7   3   5 26605.2 214.951   1
   7   3  -5 27777.3 488.149   0
   7  -3  -5 28767.9 514.407   0
   7  -3  -5 27207.4 346.606   3
  -6  -3   5 2994.78 218.717   2
   6  -3  -5 2717.91 126.076   3
   6   3  -5 3628.47 252.371   0
  -6   3   5 3008.44 120.754   1
   6  -3  -5 3818.14 275.758   0
  -5  -3   5 8606.23 235.042   2
  -5  -3   5 10130.2 265.397   1
   5  -3  -5 9227.16 221.011   3
  -5   3   5 8872.21 176.118   1
  -4  -3   5 1252.97 182.585   2
  -4  -3   5 1152.63 157.995   1
   4  -3  -5 1146.26 109.642   3
  -4   3   5 1321.65 150.264   1
  -3  -3   5 111.482 106.509   2
  -3   3   5-10.0215 35.0212   1
  -3  -3   5 42.2645 54.9385   1
   3  -3  -5 23.1991 53.5912   3
   2  -3  -5 78383.2 372.248   3
  -2   3   5 87264.1 492.658   1
  -2  -3   5 79264.7 481.227   2
  -2  -3   5 86309.9 496.324   1
   1  -3  -5 101372. 424.753   3
  -1  -3   5 111730. 575.191   1
  -1   3   5 109940. 560.422   1
  -1  -3   5 102606. 294.500   3
  -1  -3   5 96986.5 475.140   2
   0   3   5 873.600 67.0713   2
   0  -3   5 885.185 78.1604   3
   0  -3   5 883.489 141.508   1
   0   3   5 742.689 111.991   1
   0  -3   5 1044.94 143.007   2
   1  -3   5 82.5200 83.2390   0
   1  -3   5-48.5622 44.5767   1
   1  -3   5 156.448 71.5124   3
   1   3   5 167.907 121.377   1
   1  -3   5 137.615 103.248   2
   1   3   5 130.403 37.8861   2
   1   3   5 194.417 104.787   0
   2   3   5 17405.9 279.152   0
   2  -3   5 16659.5 289.865   0
   2  -3   5 17203.3 327.376   1
   2  -3   5 16398.1 273.415   2
   2   3   5 16926.4 346.914   1
   2  -3   5 16766.7 268.442   3
   3  -3   5 441.584 106.584   1
   3  -3   5 579.698 110.982   2
   3   3   5 697.144 150.439   1
   3  -3   5 488.550 115.056   3
   3  -3   5 662.475 120.637   0
   3   3   5 415.919 127.086   0
   4  -3   5 6267.94 271.315   0
   4  -3   5 5796.14 233.047   1
   4  -3   5 5810.47 231.329   3
   4   3   5 5974.45 272.464   1
   4   3   5 6378.83 273.690   0
   4  -3   5 5825.76 221.168   2
   5  -3   5 4389.60 268.833   3
   5  -3   5 4437.02 286.658   0
   5   3   5 4746.74 284.844   0
   5  -3   5 3894.15 207.375   1
   5  -3   5 4258.35 220.866   2
   5   3   5 4666.93 275.842   1
   6   3   5 763.056 151.115   1
   6  -3   5 720.632 112.068   1
   6  -3   5 487.912 115.740   3
   6  -3   5 1287.73 255.016   0
   6   3   5 1395.14 254.927   0
   7  -3   5 11625.4 311.132   1
   7  -3   5 11603.7 434.638   0
   7   3   5 12384.4 474.908   0
   7   3   5 10741.6 310.028   1
   8  -3   5 20141.5 391.742   1
   8  -3   5 26110.2 590.167   0
   8   3   5 21970.0 465.517   1
   8   3   5 24891.0 572.053   0
   9   3   5 13676.4 379.147   1
   9  -3   5 14097.4 533.391   0
   9   3   5 14657.2 521.182   0
  10   3   5 887.170 199.836   1
  10  -3   5 696.381 202.888   0
  10   3   5 896.253 281.609   0
  11  -3   5 8259.75 485.129   0
  11   3   5 6921.41 424.190   0
  12  -3   5 3328.28 364.148   0
  12   3   5 3751.45 386.551   0
  13  -3   5 138.904 198.542   0
  13   3   5 65.2017 149.164   0
  14  -3   5 333.492 226.528   0
  14   3   5 391.402 243.777   0
  15  -3   5 1190.97 324.013   0
  15   3   5 747.640 287.436   0
  18  -4  -5 50.6558 174.752   0
 -17  -4   5 1220.03 287.547   2
  17  -4  -5 773.603 310.262   0
  17   4  -5 834.729 304.016   0
 -16  -4   5 129.509 155.123   2
  16  -4  -5 47.0689 165.795   0
[truncated: 574,121 more chars]
